# Supplementary material for: Transcriptomic and Physiological Response of Durum Wheat Grain to Short-Term Heat Stress during Early Grain Filling
Source: Preprints.org preprint supplement (doi:10.20944/preprints202112.0111.v1), 2021-12-07
Supplement: Supplementary file 1 [file Supplementary Table1.xlsx]

## Sheet: Hoja1
Supplementary Table 1: Primers used for RT-qPCR.
Gene identificator
T. durum	T. aestivum (ortholog)	Primer name	Sequence 5´-3´
TRITD3Bv1G162500	TraesCS3D02G273600	HSP101-F	AAGATCATGCAGGACAGCGGAGAG
		HSP101-R	AGGGATCAATCGATGCGGTTTCC
TRITD6Bv1G185560	TraesCS6B02G346700	HSP23.5-F	AAGGACGTCTTCGAGGTCAACG
		HSP23.5-R	ATTCCGTGACGCGAAACTTGGG
TRITD4Bv1G060980	TraesCS4B02G140200	RubiscoActivaseB-F	ATGTGCTGCCTCTTCATCAACGAC
		RubiscoActivaseB-R	TGGCGTTCACCATCTGGTTGTTC
TRITD4Av1G226680	TraesCS4A02G414200	putative_ubiquitin_4AL-F	CGGGCCCGAAGAGAGTCT
		putative_ubiquitin_4AL-R	ATTAACGAAACCAATCGACGGA
TRITD5Av1G116250	TraesCS5A02G155900	DOF-A-F	GCTCCCTGATGTAAGTGCAAT
		DOF-A-R	CATGAAAATGATGGAGCGAAATAAGTC
TRITD5Bv1G096580	TraesCS5B02G154100	DOF-B-F	CATGGCAAAGCCTCCTCAAT
		DOF-B-R	CTCCAATTCAATGATCTCCATTTCG
TRITD3Bv1G044290	TraesCS3B02G130400	HSP20-F	CAGAGTGTGAGTGGGTAGCG
		HSP20-R	CCAGTACGCACGAACAGACA
TRITD2Av1G163520	TraesCS2A02G277100	Rotamase-F	ATCAGCGTTGTACCGTGGTT
		Rotamase-R	CGATCACAGACGAGGCACAA
TRITD2Bv1G010840	TraesCS2B02G047400	HSP90-F	CGTCCATGGGTGAGTGAGTT
		HSP90-R	CGACACCGACACTACCAGAC
TRITD4Bv1G019310	TraesCS4B02G059300	GlutathioneS_transferase-F	TGCTGCTGAAACTGAAAGCG
		GlutathioneS_transferase-R	CGTGCTGGTGATGATCCCAT
