# Supplementary material for: Transcriptomic and Physiological Response of Durum Wheat Grain to Short-Term Heat Stress during Early Grain Filling
Source: Preprints.org preprint supplement (doi:10.20944/preprints202112.0111.v1), 2021-12-07
Supplement: Supplementary file 3 [file Supplementary Table2.xlsx]

## Sheet: air Temp
Average daily air temperatures
	Date	Temp. (ºC)	Phenology
Ambient condition	28-01-2016	17.8	Sowing (Zadok 00)
	29-01-2016	18.9
	30-01-2016	21.6
	31-01-2016	23.6
	01-02-2016	22.7
	02-02-2016	20.8
	03-02-2016	16.9
	04-02-2016	15.2
	05-02-2016	15.4
	06-02-2016	16.4	Emergence start (Zadok 0.9)
	07-02-2016	16.2
	08-02-2016	16.9
	09-02-2016	18.8
	10-02-2016	20.7
	11-02-2016	16.6
	12-02-2016	16.5
	13-02-2016	14.1
	14-02-2016	14.4
	15-02-2016	18.8
	16-02-2016	14.7
	17-02-2016	15.8
	18-02-2016	14.1
	19-02-2016	12.5
	20-02-2016	15.4
	21-02-2016	18
	22-02-2016	17.8
	23-02-2016	15.8
	24-02-2016	13.2
	25-02-2016	13.3
	26-02-2016	14.2
	27-02-2016	13.8
	28-02-2016	15.2
	29-02-2016	16.4
	01-03-2016	18.1
	02-03-2016	17.4
	03-03-2016	18.4
	04-03-2016	17.9
	05-03-2016	20.1
	06-03-2016	15.7
	07-03-2016	17.4
	08-03-2016	14.8
	09-03-2016	18
	10-03-2016	17
	11-03-2016	16.6
	12-03-2016	16.7
	13-03-2016	16
	14-03-2016	14.3
	15-03-2016	16
	16-03-2016	16
	17-03-2016	12
	18-03-2016	10.5
	19-03-2016	16
	20-03-2016	16.9
	21-03-2016	14.2
	22-03-2016	16.2
	23-03-2016	15.8
	24-03-2016	15.6
	25-03-2016	15.6
	26-03-2016	16.5
	27-03-2016	13.2
	28-03-2016	15.2
	29-03-2016	14.5
	30-03-2016	13.1
	31-03-2016	13
Glasshouse condition	01-04-2016	19.4
	02-04-2016	18.6
	03-04-2016	20
	04-04-2016	17.6
	05-04-2016	17.7
	06-04-2016	18.2
	07-04-2016	17.4
	08-04-2016	16.8
	09-04-2016	18	Heading start (Zadok 5.0)
	10-04-2016	19.6
	11-04-2016	20.2
	12-04-2016	18
	13-04-2016	19.7
	14-04-2016	22
	15-04-2016	20.6
	16-04-2016	16.2
	17-04-2016	16
	18-04-2016	13.9
	19-04-2016	17.2
	20-04-2016	21
	21-04-2016	18.6
	22-04-2016	17.1
	23-04-2016	17
	24-04-2016	16.4
	25-04-2016	15.4
	26-04-2016	16.2
	27-04-2016	16.4
	28-04-2016	17.4
	29-04-2016	20.2	Anthesis start (Zadok 6.5)
	30-04-2016	16.2
	01-05-2016	17.6
	02-05-2016	21.1
	03-05-2016	19
	04-05-2016	19.4
	05-05-2016	19.2
	06-05-2016	21.4
	07-05-2016	19.4
	08-05-2016	18.8
	09-05-2016	18.4	HS experiment 1
	10-05-2016	18.1
	11-05-2016	20
	12-05-2016	22.3
	13-05-2016	20.4		HS experiment 2
	14-05-2016	18.2
	15-05-2016	18.7
	16-05-2016	19.2
	17-05-2016	16.8			HS experiment 3
	18-05-2016	15
	19-05-2016	17.2
	20-05-2016	17
	21-05-2016	16				HS experiment 4	HS experiment 5
	22-05-2016	14.7
	23-05-2016	18.5
	24-05-2016	18.6
	25-05-2016	20.6
	26-05-2016	19.2
	27-05-2016	15.8
	28-05-2016	13.8
	29-05-2016	18
	30-05-2016	17.2
	31-05-2016	15.7
	01-06-2016	14.4
	02-06-2016	14.4
	03-06-2016	14
	04-06-2016	15.8
	05-06-2016	14.6
	06-06-2016	16.8
	07-06-2016	16.2
	08-06-2016	16.2
	09-06-2016	15.6
	10-06-2016	15.1
	11-06-2016	12.4
	12-06-2016	12.1
	13-06-2016	17.6
	14-06-2016	16.2
	15-06-2016	15.9
	16-06-2016	16.8
	17-06-2016	17.2
	18-06-2016	16
	19-06-2016	10.8
	20-06-2016	12.4
	21-06-2016	11.8
	22-06-2016	13.2
	23-06-2016	15
	24-06-2016	14
	25-06-2016	17.8
	26-06-2016	12.7	Physiological maturity start (Zadok 8.9)
	27-06-2016	11.8
	28-06-2016	11.8
	29-06-2016	15.8
	30-06-2016	12.6
	01-07-2016	11.4
	02-07-2016	9
	03-07-2016	8.5
	04-07-2016	12.6
	05-07-2016	15.4
	06-07-2016	14.4
	07-07-2016	18
	08-07-2016	16.8
	09-07-2016	18.8
	10-07-2016	18.2

## Sheet: HS Temp
Experiment 1	Temperature (ºC)				Experiment 2	Temperature (ºC)				Experiment 3	Temperature (ºC)				Experiment 4*	Temperature (ºC)			Experiment 5*	Temperature (ºC)			(*) Experiments 4 and 5 were performed at the same time in independent HS chambers
Thermal treatment (hours)	Control 1	HS1	HS-Grain1		Thermal treatment (hours)	Control 2	HS2	HS-Grain2		Thermal treatment (hours)	Control 3	HS3	HS-Grain3		Thermal treatment (hours)	Control 4	HS4		Thermal treatment (hours)	Control 5	HS5
0	14	28.1	18.9		0	13.5	24.7	13.8		0	26	33.6	33.6		0	15.5	18.5		0	15.5	18
0.2	13.7	28.6	21.6		0.2	13.2	30.5	24.1		0.2	29.2	32.5	32.9		0.25	15.5	21		0.25	15.5	23
0.3	13.9	22.5	22.5		0.3	13	30.9	23.2		0.3	30.8	35.9	32.3		0.5	15.5	27		0.5	15.5	25.5
0.5	14.3	24.1	21.9		0.5	13	29.2	23.2		0.5	30.6	32.6	28.5		0.75	16	27.5		0.75	16	25.5
0.7	14	24.2	21.5		0.7	13.1	30.7	23.3		0.7	28	32.2	24.6		1	17	28		1	17	26
0.8	14.5	24.9	22.4		0.8	13.1	29.6	23.1		0.8	27.8	35.7	27.2		1.24333	17	28		1.24333	17	26
1	14.3	27.5	22.6		1	12.8	30.3	22.8		1	28	34.8	27		1.49	18	29.5		1.49	18	27.5
1.2	14.2	26.7	22.8		1.2	12.7	30.7	22.3		1.2	27.8	34.2	26.8		1.73667	19.5	30.5		1.73667	19.5	28.5
1.3	14.7	23.2	22.7		1.3	12.9	30.2	22.5		1.3	31.1	34.8	29.5		1.98333	19	30.5		1.98333	19	29
1.5	14.8	28	23.1		1.5	12.9	29.7	22.2		1.5	29.2	34.3	29.7		2.23	20	32		2.23	20	30
1.7	15.4	26.5	23.3		1.7	12.8	28.8	22.3		1.7	29.5	40.7	34.1		2.47667	21.5	35		2.47667	21.5	33.5
1.8	14.7	29.1	24.1		1.8	12.6	26.8	22.1		1.8	31.7	37.8	30.4		2.72333	25	36		2.72333	25	34.5
2	15.3	28.2	24		2	12.4	29.1	21.6		2	30.2	46.3	40.3		2.97	24	36		2.97	24	34
2.2	15.1	24.2	24.1		2.2	12.1	28.5	21.4		2.2	27.7	35.4	30.5		3.21667	25.5	38		3.21667	25.5	35
2.3	16.6	28.3	25.2		2.3	12.1	27.8	21.4		2.3	31.9	37.2	32.1		3.46333	27	39		3.46333	27	36
2.5	16.7	31.7	25.7		2.5	11.9	26.5	21.1		2.5	28.2	34.6	30		3.71	26.5	37.5		3.71	26.5	36.5
2.7	16.9	33.4	26.2		2.7	11.6	27.7	21.5		2.7	28.5	34.9	30.4		3.95667	23.5	33.5		3.95667	23.5	32
2.8	17.5	28.6	26.1		2.8	11.5	29	21.6		2.8	32.4	33.2	29		4.20333	24.5	38.5		4.20333	24.5	36
3	16.4	28.7	26.5		3	11.4	28.3	21.2		3	31	35.9	31.2		4.45	24.5	34.5		4.45	24.5	33.5
3.2	17.6	28.5	25.6		3.2	11.4	27.9	21.3		3.2	30.4	33.4	29.1		4.69667	22.5	33		4.69667	22.5	31.5
3.3	16.9	30.1	26.1		3.3	11.5	27.3	21.5		3.3	29.5	34.2	30.1		4.94333	22	32.5		4.94333	22	31.5
3.5	17.7	30.8	26		3.5	11.3	27.7	21.6		3.5	29.1	36	32.5		5.19	23	35		5.19	23	35
3.7	17	30.3	26.5		3.7	11.3	28.4	21.6		3.7	24.2	32.5	30.1		5.43667	25.5	44.5		5.43667	25.5	36
3.8	17.7	26.9	25.9		3.8	11.2	27.9	21.7		3.8	23.6	34	31.1		5.68333	29	42.5		5.68333	29	41
4	18.2	33.1	26.6		4	10.9	24.3	21.4		4	24.4	33.3	30.6		5.93	27.5	40		5.93	27.5	38
4.2	20.2	35.5	30.6		4.2	10.7	26.9	21.4		4.2	21.1	29.9	27.7		6.17667	27.5	39		6.17667	27.5	36.5
4.3	22.9	36.8	30.6		4.3	10.6	27.6	21.4		4.3	19.6	30.5	28.1		6.42333	27.5	36		6.42333	27.5	36.5
4.5	19.1	29.9	28.6		4.5	10.4	26.8	21.3		4.5	18.5	29.4	27.5		6.67	24.5	30		6.67	24.5	30.5
4.7	21.9	35.1	28.4		4.7	10.4	26.8	21.3		4.7	17.3	27.1	25.4		6.91667	26.5	34.5		6.91667	26.5	33.5
4.8	21.9	36.4	29.2		4.8	10.3	27.4	21.4		4.8	16.4	29	26.7		7.16333	25.5	32.5		7.16333	25.5	33.5
5	24.2	37	35.4		5	10.4	26.4	21.3		5	15.6	26.9	25.6		7.41	22	26		7.41	22	26.5
5.2	22.8	36.1	31.6		5.2	10.4	27.3	21.5		5.2	15.3	28	26.4		7.65667	21	25.5		7.65667	21	25.5
5.3	21.2	35.2	34.3		5.3	10.5	27	21.5		5.3	14.9	26.8	25		7.90333	20.5	27		7.90333	20.5	25
5.5	20.9	33.9	32.9		5.5	10.5	27.8	21.6		5.5	14.7	26.5	25.4		8.15	20	28.5		8.15	20	24.5
5.7	21.5	35.3	31.5		5.7	10.5	26.5	21.6		5.7	14.9	27.8	26.8		8.39667	19	30.5		8.39667	19	30
5.8	21.4	32	32.1		5.8	10.5	27.1	21.6		5.8	14.3	26.4	25.1		8.64333	18	29.5		8.64333	18	29
6	20.9	30.6	27.9		6	10.4	27	21.6		6	14.4	27	26		8.89	18	29		8.89	18	28.5
6.2	18.5	33.1	29.5		6.2	10.3	26.4	21.6		6.2	14	27.1	26		9.13667	17.5	29		9.13667	17.5	28
6.3	18.2	33.4	28.3		6.3	10.4	26.2	21.5		6.3	13.5	26.5	25.4		9.38333	17.5	28.5		9.38333	17.5	28
6.5	17.4	31.5	25.6		6.5	10.3	26.5	21.7		6.5	13.7	25.2	24.7		9.63	17	28.5		9.63	17	27.5
6.7	16.5	32.7	24.7		6.7	10.5	27.1	21.7		6.7	14.1	28.5	27.7		9.87667	16.5	27.5		9.87667	16.5	27
6.8	17.4	30	24.8		6.8	10.4	26.4	21.8		6.8	14.1	28.2	27.2		10.1233	16	27.5		10.1233	16	26.5
7	16.8	25.1	24.5		7	10.3	26.6	21.8		7	13.8	27.9	27		10.37	16	27.5		10.37	16	26.5
7.2	16	24.7	24		7.2	10.1	25.9	21.5		7.2	13.6	27	26.6		10.6167	16	27		10.6167	16	26.5
7.3	15.7	25.7	23.3		7.3	9.9	24.2	21.5		7.3	13.6	28.8	27.6		10.8633	16	27.5		10.8633	16	26.5
7.5	15.1	26.4	23.3		7.5	9.8	23	21.2		7.5	13.4	26.9	26.2		11.11	16	27.5		11.11	16	27
7.7	14.9	27.3	22.8		7.7	9.7	26.5	21.3		7.7	13.3	26.6	25.7		11.3567	16	27.5		11.3567	16	27
7.8	14.7	27	22.2		7.8	9.5	25.9	21.1		7.8	12.9	26.7	25.6		11.6033	16	27.5		11.6033	16	26.5
8	14.5	25.1	22.2		8	9.5	26.2	21		8	12.9	27.8	26.8		11.85	16	27		11.85	16	27
8.2	14.1	22.5	22.3		8.2	9.1	26.1	21		8.2	12.7	27.5	26.7		12.0967	15.5	27		12.0967	15.5	26
8.3	13.9	23.8	21.9		8.3	9	25.6	20.8		8.3	12.4	26.1	25.1		12.3433	15	26.5		12.3433	15	25.5
8.5	13.7	26.1	22.1		8.5	8.8	25.8	20.6		8.5	12.5	25.6	24.7		12.59	15	26.5		12.59	15	25.5
8.7	13.6	24.5	21.1		8.7	9	25.6	20.3		8.7	12.5	26.7	25.4		12.8367	15	27		12.8367	15	25.5
8.8	13.4	23	21.4		8.8	8.9	23.1	20.6		8.8	12.3	25.6	25.1		13.0833	15.5	26.5		13.0833	15.5	26
9	13.3	21.4	20.7		9	8.9	22.1	20.8		9	12.1	26.4	25.8		13.33	15.5	26		13.33	15.5	26.5
9.2	13.2	24.8	21.1		9.2	8.7	25.9	20.5		9.2	12	27.3	26.1		13.5767	15.5	26.5		13.5767	15.5	26.5
9.3	12.8	26.3	21		9.3	8.7	26.8	20.4		9.3	11.9	26.9	26.4		13.8233	15.5	26.5		13.8233	15.5	26.5
9.5	12.7	21.3	20.5		9.5	8.6	25.6	20.6		9.5	12	26.7	25.5		14.07	15	27		14.07	15	26
9.7	12.4	22.8	20.1		9.7	8.6	22.8	20.5		9.7	11.7	26.1	25.2		14.3167	15	26.5		14.3167	15	26.5
9.8	12.2	23.9	20		9.8	8.5	25.4	20.3		9.8	11.9	26.4	25.5		14.5633	15	26.5		14.5633	15	25.5
10	12	24.3	20.2		10	8.3	25	20.3		10	12	26.4	25.2		14.81	15	26		14.81	15	25.5
10.2	11.8	25.2	19.8		10.2	8.3	25.6	20.1		10.2	12.2	26.6	26		15.0567	14.5	26		15.0567	14.5	25.5
10.3	11.6	21.1	19.6		10.3	8.1	25.4	20.1		10.3	12.4	26.3	25.3		15.3033	14.5	25.5		15.3033	14.5	25.5
10.5	11.6	24.4	19.4		10.5	8	23.8	19.7		10.5	12.5	26	25.1		15.55	14.5	25.5		15.55	14.5	25
10.7	11.2	20.3	19.3		10.7	7.8	24.6	19.4		10.7	12.5	27	26.1		15.7967	14.5	25.5		15.7967	14.5	25.5
10.8	11.2	21.8	19.1		10.8	7.7	21.8	19.6		10.8	12.5	25.8	24.8		16.0433	14	25.5		16.0433	14	25
11	11	25.5	19.1		11	7.6	24.2	19.9		11	12.7	26.4	26.1		16.29	14	25		16.29	14	24
11.2	11.2	22.7	19.3		11.2	7.6	25	19.5		11.2	12.4	25.8	25		16.5367	13.5	25		16.5367	13.5	24
11.3	11.5	20.3	19.2		11.3	7.5	23.9	19.5		11.3	12.4	25.6	24.8		16.7833	13.5	24.5		16.7833	13.5	25
11.5	11.7	22.4	19.6		11.5	7.7	24.9	19.8		11.5	12.3	26.6	25.6		17.03	13.5	24.5		17.03	13.5	24.5
11.7	11.8	23	19.1		11.7	7.9	26	19.7		11.7	11.9	25.7	24.7		17.2767	13.5	24.5		17.2767	13.5	24
11.8	11.9	23.4	19.6		11.8	8.2	24.9	20		11.8	11.9	26.3	25.4		17.5233	13.5	25		17.5233	13.5	25
12	12	21.4	19.7		12	8.3	24.8	20.2		12	11.6	26.8	25.4		17.77	13.5	25.5		17.77	13.5	25
12.2	12	22.4	20.1		12.2	8.5	24.4	20.3		12.2	11.7	26	25.5		18.0167	13.5	25.5		18.0167	13.5	24.5
12.3	12.1	21.4	19.9		12.3	8.4	25.7	20.3		12.3	11.6	25.8	24.5		18.2633	14	25.5		18.2633	14	24.5
12.5	12.2	23.6	20		12.5	8	24.8	20.2		12.5	11.5	25	24		18.51	14	26		18.51	14	24.5
12.7	12.3	20.6	20.2		12.7	7.7	22.7	19.9		12.7	11.4	25.4	24.7		18.7567	14	25		18.7567	14	24.5
12.8	12.3	23.3	20.2		12.8	7.6	23.1	19.5		12.8	11.1	25.2	25.1		19.0033	13.5	24.5		19.0033	13.5	24.5
13	12.4	20.7	20		13	7.5	22.4	19.7		13	10.8	26.1	24.9		19.25	13.5	24.5		19.25	13.5	24.5
13.2	12.4	25.7	20.3		13.2	7.4	24.4	19.5		13.2	10.9	25.3	24.4		19.4967	13	24.5		19.4967	13	24
13.3	12.4	24.7	20.2		13.3	7.1	24.7	19.3		13.3	10.7	25.4	24.8		19.7433	13.5	24.5		19.7433	13.5	25
13.5	12.4	23.7	20		13.5	23	34.6	32.6		13.5	10.3	24.9	24.2		19.99	13.5	24.5		19.99	13.5	24.5
13.7	12.4	26.7	20.3		13.7	22.3	33.2	31.5		13.7	10.1	24.9	23.9		20.2367	13.5	25		20.2367	13.5	25
13.8	12.4	21.2	19.9		13.8	19.9	28.5	28.1		13.8	9.9	25.2	24.3		20.4833	13.5	25		20.4833	13.5	25
14	12.3	21.2	20.1		14	20	31.9	28.1		14	9.9	25	24.1		20.73	13.5	25		20.73	13.5	24
14.2	12.4	22.7	20.3		14.2	19.9	30.7	26.5		14.2	9.7	24.7	24.1		20.9767	13.5	25		20.9767	13.5	25
14.3	12.3	25.7	20		14.3	18.5	27.8	26.7		14.3	9.7	24.7	24.2		21.2233	13.5	25		21.2233	13.5	24
14.5	12.2	21.7	20.2		14.5	19.6	31.4	27.1		14.5	9.7	24.9	24.2		21.47	13.5	25		21.47	13.5	24.5
14.7	12	20.6	20.2		14.7	18.8	27.9	25.8		14.7	9.6	24.9	24.3		21.7167	13.5	25		21.7167	13.5	24.5
14.8	12	21.5	20.2		14.8	18.7	32.5	28		14.8	9.7	24.2	23.5		21.9633	13.5	26.5		21.9633	13.5	25
15	12	24.1	20.1		15	19.2	34.1	29.6		15	9.5	23.6	22.9		22.21	13.5	25		22.21	13.5	24.5
15.2	11.9	25.4	19.8		15.2	17.9	28.9	28.4		15.2	9.4	23.7	23.2		22.4567	13.5	24		22.4567	13.5	24
15.3	11.8	21.6	19.4		15.3	17.4	27.3	26.6		15.3	9.5	23.8	23.1		22.7033	13.5	25.5		22.7033	13.5	24
15.5	11.8	23.5	19.1		15.5	16.2	27.3	25.6		15.5	9.5	23.8	23.4		22.95	13.5	25		22.95	13.5	24.5
15.7	11.7	23.5	19.2		15.7	15.7	26.2	24.3		15.7	9.6	23.7	23.2		23.1967	14	25		23.1967	14	24.5
15.8	11.8	22.7	19.1		15.8	15	28.1	24.5		15.8	9.6	24.8	23.9		23.4433	14	25		23.4433	14	24.5
16	11.7	24.1	19.3		16	14.1	27.1	23.1		16	9.6	24	23.3		23.69	14.5	26.5		23.69	14.5	25.5
16.2	11.8	21.4	19.2		16.2	13.5	23.5	22.5		16.2	9.6	24	23		23.9367	15	26		23.9367	15	25.5
16.3	11.5	24.6	19.2		16.3	12.8	25.2	21.6		16.3	9.6	23.8	23.4		24.1833	15.5	26.5		24.1833	15.5	25.5
16.5	11.6	22.5	19.2		16.5	12.2	24.8	21.5		16.5	9.5	24	23.4		24.43	15.5	27		24.43	15.5	27
16.7	11.4	24.8	19.4		16.7	11.8	25	20.4		16.7	9.4	23.9	23.2		24.6767	16	27.5		24.6767	16	26
16.8	11.3	20.3	18.9		16.8	11.1	23.1	20		16.8	9.3	23.7	23		24.9233	16	27		24.9233	16	26
17	11.3	23.4	19.5		17	10.7	24.3	19.4		17	9.3	23.8	23.4		25.17	16.5	27.5		25.17	16.5	27
17.2	11.2	21.9	19.2		17.2	10.5	22.7	19		17.2	9.3	24.4	23.6		25.4167	16.5	28		25.4167	16.5	27.5
17.3	11.3	24.3	19.2		17.3	10.5	22.5	18.9		17.3	9.5	23.4	22.4		25.6633	16.5	27.5		25.6633	16.5	27
17.5	11.3	24.7	19		17.5	9.9	20.8	18.9		17.5	9.8	24.4	23.7		25.91	16.5	28		25.91	16.5	27.5
17.7	11.3	24.8	19.2		17.7	9.6	20.2	18.5		17.7	10.3	24.7	24.3		26.1567	16.5	29		26.1567	16.5	27
17.8	11.4	19.9	19.2		17.8	9.4	21.2	18		17.8	11	25.3	24.2		26.4033	18	29.5		26.4033	18	28
18	11.2	23.7	19.1		18	9.3	20.7	17.9		18	11.9	26.1	25		26.65	19	35.5		26.65	19	29
18.2	11.3	20	19.1		18.2	9	18.7	17.5		18.2	13.1	27.1	26.1		26.8967	20	31		26.8967	20	30
18.3	11.3	22.7	19.5		18.3	9.4	24.8	20.1		18.3	14.3	28	26.6		27.1433	20	32		27.1433	20	30
18.5	11.4	20.1	19.2		18.5	9.5	23.8	21		18.5	14.4	26.9	25.4		27.39	21.5	32.5		27.39	21.5	31
18.7	11.3	23.7	19.4		18.7	9.3	26.6	21.2		18.7	14.5	27.7	26.1		27.6367	26.5	41		27.6367	26.5	36
18.8	11.3	22.3	19.2		18.8	9.2	22.4	20.8		18.8	16	29.1	27.3		27.8833	25.5	39.5		27.8833	25.5	35.5
19	11.3	24.6	19		19	9.2	25.3	20.8		19	16.6	27.6	25.5		28.13	28	42		28.13	28	38
19.2	11.2	21.2	19.4		19.2	8.9	24.4	20.6		19.2	17.5	29.4	27.2		28.3767	29	38		28.3767	29	39
19.3	11.2	21.1	19.4		19.3	8.6	24.4	20.2		19.3	17.9	28.3	26.7		28.6233	26.5	33.5		28.6233	26.5	37
19.5	11.2	22.5	19		19.5	8.5	23.7	20.2		19.5	18.2	27.4	25.8		28.87	26	32		28.87	26	36.5
19.7	11.3	24.6	19		19.7	8.4	22.6	20.2		19.7	18.1	27.6	26.4		29.1167	30	37.5		29.1167	30	41
19.8	11.4	20.5	19.2		19.8	8.2	23.1	19.6		19.8	19.9	28.8	26.8		29.3633	26.5	32.5		29.3633	26.5	37
20	11.4	21	19.1		20	8	24.1	19.5		20	19.1	27.1	25		29.61	26	35.5		29.61	26	37.5
20.2	11.4	20.6	19.1		20.2	8	23.4	19.3		20.2	18.8	27.4	24.8		29.8567	24	29.5		29.8567	24	35.5
20.3	11.3	21.3	19		20.3	7.9	20.6	19		20.3	18.3	28.6	26.1		30.1033	22.5	26.5		30.1033	22.5	33
20.5	11.4	24.4	18.9		20.5	7.7	20.6	18.8		20.5	18.9	29	26.1		30.35	22.5	26.5		30.35	22.5	33
20.7	11.4	23	18.9		20.7	7.6	24.6	18.8		20.7	21.7	28.5	25.8		30.5967	25.5	31.5		30.5967	25.5	36.5
20.8	11.2	19.4	19.3		20.8	7.5	24.5	19		20.8	21.3	27.4	23.9		30.8433	22	25.5		30.8433	22	33
21	11.2	21.2	19.2		21	7.5	23	18.6		21	22.3	28.2	24.9		31.09	22	27		31.09	22	34.5
21.2	11.2	21.6	19.4		21.2	7.1	22.7	18.3		21.2	21.6	29	25.4		31.3367	23.5	29.5		31.3367	23.5	35.5
21.3	11	24.8	19.5		21.3	6.9	23.2	18.4		21.3	23.3	32.6	28.6		31.5833	21	24		31.5833	21	32
21.5	11.1	19.3	19.3		21.5	6.6	23	18.4		21.5	21.8	28.5	25.4		31.83	19	21		31.83	19	30
21.7	11.3	24.5	19.2		21.7	6.8	21.9	17.9		21.7	22.2	30.1	27.3		32.0767	17.5	19.5		32.0767	17.5	28
21.8	11.5	20	19.3		21.8	6.9	22.3	18.3		21.8	21.6	27.6	24.6		32.3233	17	23.5		32.3233	17	28.5
22	11.6	21.9	19.1		22	6.8	22.9	18.2		22	21.7	31.5	28.3		32.57	17	29		32.57	17	26.5
22.2	11.5	23.1	19.1		22.2	6.8	20.7	18.2		22.2	22.2	32.5	29.5		32.8167	16.5	28.5		32.8167	16.5	26.5
22.3	11.6	22.8	19.8		22.3	6.7	23.8	17.9		22.3	21.5	32	29.2		33.0633	16.5	28		33.0633	16.5	26
22.5	12	24.7	20.1		22.5	6.2	21.4	17.4		22.5	26.4	31.2	28.3		33.31	16	28		33.31	16	26
22.7	12.2	23.3	19.9		22.7	6.3	20.6	17.8		22.7	26.8	30.7	26.7		33.5567	15.5	28		33.5567	15.5	25.5
22.8	12.5	23	20.3		22.8	6.4	22.5	17.6		22.8	24.8	30.7	26.9		33.8033	15.5	27		33.8033	15.5	25
23	12.7	22.2	20.8		23	6.2	22.6	17.6		23	27.7	31.8	30.3		34.05	15	27		34.05	15	25
23.2	12.6	20.6	20.9		23.2	6.3	21.9	17.5		23.2	25.6	31	27.2		34.2967	14.5	27.5		34.2967	14.5	24.5
23.3	12.4	20.2	21.1		23.3	6	21.7	17.3		23.3	25.5	30.5	26.1		34.5433	14.5	27		34.5433	14.5	24.5
23.5	13	25.2	20.9		23.5	5.7	20.4	17.3		23.5	22.8	27.5	24.5		34.79	14.5	26.5		34.79	14.5	24.5
23.7	13	25	21.4		23.7	5.9	20.3	17.3		23.7	21.7	28.4	25.3		35.0367	14.5	26.5		35.0367	14.5	24
23.8	13.8	26	21.8		23.8	5.9	23.4	17.3		23.8	21.4	28.9	26.3		35.2833	14.5	25.5		35.2833	14.5	24
24	14	22.7	21.9		24	6	21.8	17.4		24	27.8	32.3	27.8		35.53	14	26		35.53	14	25
24.2	14.2	22.9	22.3		24.2	5.6	22.6	16.9		24.2	29	34.6	28.9		35.7767	14	26		35.7767	14	24.5
24.3	14.1	23.9	22.3		24.3	5.6	19.4	16.9		24.3	30.9	36	29.3		36.0233	14	26.5		36.0233	14	24
24.5	13.7	28.7	22.6		24.5	5.6	23.8	16.9		24.5	27.8	33.9	28.7		36.27	13.5	25		36.27	13.5	23
24.7	14.4	26.5	22.7		24.7	5.5	22.7	17.2		24.7	29.1	32.5	27		36.5167	13	24.5		36.5167	13	23.5
24.8	14.6	26.4	22.3		24.8	5.4	21.6	16.9		24.8	26	31.3	25.3		36.7633	13	24.5		36.7633	13	23
25	15.2	29	23		25	5.8	22.3	17		25	26.6	30.9	25.3		37.01	13	24.5		37.01	13	22.5
25.2	15.3	24.9	23.2		25.2	5.6	22.4	16.7		25.2	29	31.5	26		37.2567	13	24.5		37.2567	13	22.5
25.3	15.6	25.9	23.9		25.3	5.4	19.3	16.8		25.3	29.4	31.2	27.2		37.5033	13	26		37.5033	13	22.5
25.5	15.9	26.6	23.8		25.5	5.5	20.7	16.6		25.5	30.2	31.3	28.5		37.75	12.5	24.5		37.75	12.5	22.5
25.7	15.7	24.6	23.2		25.7	5.1	20	16.6		25.7	27.8	31.3	27		37.9967	12.5	23.5		37.9967	12.5	22.5
25.8	15.7	27	23.4		25.8	5.2	22.2	16.6		25.8	27.6	30	26.1		38.2433	12.5	24		38.2433	12.5	22.5
26	16	27.5	24.5		26	5.3	21.3	16.7		26	27.2	31.4	27.8		38.49	12.5	23.5		38.49	12.5	22
26.2	16.2	30.6	24.6		26.2	5.2	19.5	16.7		26.2	23.6	29.3	26.3		38.7367	12.5	24.5		38.7367	12.5	22.5
26.3	17.9	34.3	26.6		26.3	5.7	19.3	16.9		26.3	25.9	30.7	27.3		38.9833	12.5	25		38.9833	12.5	23
26.5	19.8	32	29.3		26.5	5.7	23.4	17.2		26.5	22.7	29.8	26.9		39.23	13	25		39.23	13	23
26.7	18.8	30.6	28.1		26.7	5.8	22.6	17.2		26.7	21.6	27.5	25.6		39.4767	13	24.5		39.4767	13	23.5
26.8	18.1	32.8	27.1		26.8	6	22.1	17.2		26.8	24.9	27.4	25.4		39.7233	13	25.5		39.7233	13	23.5
27	19.5	32.3	28.5		27	6	19.4	17.3		27	24.3	27.2	22.9		39.97	13	25		39.97	13	23.5
27.2	19.4	35.3	28.9		27.2	6	23.7	17.4		27.2	27.4	29.9	26.5		40.2167	13	25		40.2167	13	23
27.3	19.5	30.5	28.5		27.3	6.1	22.1	17.2		27.3	27.2	31.4	28.3		40.4633	13	24.5		40.4633	13	23
27.5	18.6	29	28.3		27.5	6.2	21.6	17.5		27.5	26.5	33.1	28.6		40.71	13	24.5		40.71	13	23
27.7	17.9	31.4	26.9		27.7	6.1	21.8	17.5		27.7	22.4	27	25.4		40.9567	13	25		40.9567	13	23
27.8	18.7	30.8	26.1		27.8	6.1	19.4	17.2		27.8	22	29.1	26.6		41.2033	13	25		41.2033	13	23.5
28	18.2	29.4	26.7		28	6.1	23.2	17.3		28	22.7	31.1	28.8		41.45	13	25		41.45	13	23.5
28.2	18.1	27.7	26.3		28.2	6.1	19.4	17.2		28.2	19	28.5	26.4		41.6967	13	25		41.6967	13	23
28.3	17.8	27.5	26		28.3	6.1	21.6	17.5		28.3	17.7	29	26.6		41.9433	13	25		41.9433	13	23.5
28.5	18	28	25.5		28.5	6.3	22.5	17.4		28.5	16.1	26.7	25		42.19	13	25		42.19	13	23
28.7	18	27.2	25.2		28.7	6.2	21.7	17.5		28.7	15.9	27.6	25.9		42.4367	13	24.5		42.4367	13	23
28.8	17	27.7	25.3		28.8	6.1	22	17.5		28.8	15.4	25.7	24.2		42.6833	13	25.5		42.6833	13	23.5
29	16.9	27.3	24.8		29	6.1	21.7	17.5		29	14.6	27.4	25.6		42.93	13	24.5		42.93	13	23.5
29.2	16.6	26.9	24.3		29.2	6.3	19	17.3		29.2	14.5	26.4	24.9		43.1767	13	25		43.1767	13	23.5
29.3	16.6	25.5	24.2		29.3	6.1	19.4	17.5		29.3	14.2	26.5	25.2		43.4233	13	25		43.4233	13	23
29.5	17	27.6	24.8		29.5	6	23.4	17.4		29.5	14.2	26.3	24.7		43.67	13	25		43.67	13	23
29.7	16.9	26.6	24.4		29.7	6	20.5	17.4		29.7	14.1	24.5	23.3		43.9167	13	24.5		43.9167	13	23
29.8	16.6	30.4	24.2		29.8	6	20.4	17.4		29.8	14.3	25.9	25.2		44.1633	13	24.5		44.1633	13	23
30	16.4	27.6	24.2		30	5.7	20.6	17.3		30	14.1	24.3	24.1		44.41	13	25		44.41	13	23
30.2	16.3	26.2	24.4		30.2	5.8	21.2	17.1		30.2	14	27.3	25.6		44.6567	13	25		44.6567	13	23
30.3	16.1	24.6	23.8		30.3	5.8	23.4	17.1		30.3	14	28.9	26.8		44.9033	13	24.5		44.9033	13	22.5
30.5	15.9	25	23.6		30.5	6	22.2	17.3		30.5	13.9	26.4	26.1		45.15	13	24.5		45.15	13	23.5
30.7	15.7	27.7	23.9		30.7	5.8	19.7	17.5		30.7	13.6	23.6	23.3		45.3967	13	25		45.3967	13	23
30.8	15.4	27	22.6		30.8	6.3	20.4	17		30.8	13.3	23.8	22.9		45.6433	13	25		45.6433	13	23
31	15.4	24.1	22.9		31	6.4	21.4	17.2		31	12.9	25.2	23.8		45.89	13	24.5		45.89	13	22
31.2	14.9	27.6	23.1		31.2	6.5	21.9	17.8		31.2	12.8	26.5	24.9		46.1367	12.5	24.5		46.1367	12.5	22.5
31.3	14.7	24.7	22.2		31.3	6.7	24.5	18.1		31.3	12.5	24.5	23		46.3833	12.5	25		46.3833	12.5	22.5
31.5	14.4	28.9	22		31.5	6.8	23.1	18.2		31.5	12.3	25.8	24.2		46.63	13	25		46.63	13	22.5
31.7	14.2	26.7	21.8		31.7	6.6	24	18		31.7	11.9	24.7	23.3		46.8767	13	24.5		46.8767	13	23
31.8	14.1	25.7	21.8		31.8	6.6	28.2	22.4		31.8	11.6	25.2	23.4		47.1233	13.5	24.5		47.1233	13.5	23
32	13.9	23.2	22.1		32	7.3	29.1	23.3		32	11.3	23.4	22.1		47.37	13.5	24.5		47.37	13.5	23.5
32.2	13.8	23.1	21.2		32.2	7.1	28.4	23.1		32.2	11.3	24.6	23.1		47.6167	13.5	25.5		47.6167	13.5	23.5
32.3	13.8	23.4	21.2		32.3	8.7	28.5	23.8		32.3	11.1	23.4	22.1		47.8633	14	25.5		47.8633	14	24
32.5	13.7	27.3	21.3		32.5	8.5	29.2	24.5		32.5	10.8	23.5	22.1		48.11	14	26		48.11	14	24.5
32.7	13.5	23	20.7		32.7	8.3	30.4	24.5		32.7	10.6	22.4	21.6		48.3567	14.5	25.5		48.3567	14.5	24.5
32.8	13.4	25.4	20.9		32.8	8.7	30.5	24.9		32.8	10.2	21.8	21.2		48.6033	15	26.5		48.6033	15	25
33	13.3	24.5	21.2		33	8.9	31.1	25.5		33	10.1	22.5	21.8		48.85	16	27.5		48.85	16	25.5
33.2	13.2	27.1	21		33.2	9.6	31.6	26		33.2	10	22.4	21.4		49.0967	16	29		49.0967	16	25.5
33.3	13.3	22.3	21.1		33.3	10.4	32.7	26.7		33.3	9.7	24.5	23		49.3433	16	27.5		49.3433	16	25.5
33.5	13.2	23.7	21.1		33.5	9.9	32.7	27.3		33.5	9.4	20.9	20.1		49.59	16	28		49.59	16	26
33.7	13	26.4	21.2		33.7	9.4	32.1	26.7		33.7	9.4	21.7	20.5		49.8367	16	27.5		49.8367	16	26
33.8	12.8	26	20.6		33.8	10.2	33.1	27		33.8	9.3	23.4	21.8		50.0833	15.5	27		50.0833	15.5	25.5
34	12.4	21.4	20.2		34	10.7	32.7	27		34	9.1	23.9	22.2		50.33	15.5	27		50.33	15.5	25
34.2	12.5	24	20.1		34.2	10.9	33	27.1		34.2	9.1	23.4	22		50.5767	16	28		50.5767	16	26
34.3	12.3	24	19.9		34.3	11	34	28.1		34.3	8.6	22.9	21.5		50.8233	18	29.5		50.8233	18	27.5
34.5	12.3	22	20.1		34.5	12	27.2	27.3		34.5	8.7	22.7	21.6		51.07	18.5	30		51.07	18.5	29
34.7	12.2	23	19.7		34.7	13.4	28.9	25.4		34.7	8.5	20.4	20.8		51.3167	19.5	31.5		51.3167	19.5	29.5
34.8	12.1	20.6	20.2		34.8	14.1	30.6	26.2		34.8	8.2	23.2	21.6		51.5633	21	33.5		51.5633	21	31.5
35	12	22	19.9		35	14.6	29.8	25.1		35	8.2	22	20.7		51.81	19	29.5		51.81	19	28.5
35.2	12	21.1	19.9		35.2	13.4	29.6	24.6		35.2	7.9	23.9	21.8		52.0567	19	30.5		52.0567	19	29.5
35.3	11.8	20.5	19.1		35.3	13	28.1	24.5		35.3	7.9	22.9	21.4		52.3033	19	29		52.3033	19	29
35.5	11.7	24.1	18.8		35.5	13.2	25.9	23.5		35.5	8	22.3	21		52.55	19	29.5		52.55	19	28.5
35.7	11.4	22	18.9		35.7	13	27.7	23.7		35.7	7.9	19.4	19		52.7967	19	30.5		52.7967	19	28.5
35.8	11.5	23.1	18.9		35.8	13.7	26.8	24		35.8	8.1	22.2	20.8		53.0433	19	30.5		53.0433	19	29
36	11.4	24.2	18.9		36	13.2	30.1	23.9		36	7.8	22.8	21.3		53.29	19	30.5		53.29	19	29
36.2	11.5	21.9	18.9		36.2	13.3	28.2	23.6		36.2	7.6	18.8	19		53.5367	19	30		53.5367	19	29
36.3	11.8	20.8	18.9		36.3	13.6	27.9	23.3		36.3	7.4	18.9	18.7		53.7833	19	30.5		53.7833	19	29
36.5	11.9	23.3	18.5		36.5	15.8	31.5	25.6		36.5	7.4	17.9	17.6		54.03	19	30.5		54.03	19	29
36.7	11.9	22.7	18.8		36.7	17.2	29.1	25.9		36.7	7.3	21.2	20.3		54.2767	19	30.5		54.2767	19	29
36.8	11.9	22.6	18.8		36.8	15.4	29.1	26.3		36.8	7.1	20.6	19.5		54.5233	19	30.5		54.5233	19	28.5
37	12.1	25.9	19.5		37	14.2	28.1	23.7		37	7	17.9	17.9		54.77	18.5	30		54.77	18.5	28.5
37.2	12	23.1	19.8		37.2	15.8	32.9	26.5		37.2	7.2	18.7	18.6		55.0167	18	30		55.0167	18	28
37.3	12.2	22.3	20		37.3	15.2	28.8	25.3		37.3	7.2	20.9	20.2		55.2633	17	28.5		55.2633	17	27.5
37.5	12.3	24.5	20.1		37.5	14.7	27.2	24.6		37.5	7.4	18.8	18.7		55.51	16.5	28.5		55.51	16.5	26.5
37.7	12.3	23.5	20		37.7	14.7	25.5	23.8		37.7	7.5	19.5	18.9		55.7567	16	27.5		55.7567	16	25.5
37.8	12.4	21.8	20.5		37.8	13.7	28.8	24.6		37.8	7.4	19.5	19.2		56.0033	15.5	27		56.0033	15.5	25
38	12.3	23.4	20.2		38	13.6	27	24.5		38	7.4	20.3	20.1		56.25	15	26.5		56.25	15	25.5
38.2	12.3	24	20.2		38.2	12.8	24.4	23.7		38.2	7.3	22.4	20.7		56.4967	15	27		56.4967	15	25
38.3	12.3	22.5	20.2		38.3	12.6	28.8	23.6		38.3	7.3	19.2	18.7		56.7433	14.5	27		56.7433	14.5	24.5
38.5	12.4	21.5	20.1		38.5	13.6	27.8	24.4		38.5	7	22.3	20.8		56.99	14.5	27		56.99	14.5	24.5
38.7	12.4	25.4	20.2		38.7	13.1	29.8	24.5		38.7	6.6	21.5	20.1		57.2367	14.5	26		57.2367	14.5	24.5
38.8	12.4	23.4	20.1		38.8	13	26.3	24.2		38.8	6.7	20.8	19.6		57.4833	14.5	26		57.4833	14.5	24
39	12.4	25.6	20.1		39	13.4	27.9	24.2		39	6.5	17.1	17.3		57.73	14.5	26.5		57.73	14.5	24.5
39.2	12.4	24.2	20.1		39.2	12.9	27.8	23.9		39.2	6.3	21.5	20.2		57.9767	14.5	25.5		57.9767	14.5	24
39.3	12.3	35.3	24.5		39.3	12.8	27.6	24		39.3	6.5	19.5	18.9		58.2233	14.5	25.5		58.2233	14.5	24
39.5	12.5	25.5	20.8		39.5	12.4	24.5	23.6		39.5	6	18.5	18		58.47	14.5	26		58.47	14.5	24.5
39.7	12.4	23.6	22.7		39.7	12.2	26.9	23		39.7	5.9	20.9	19.4		58.7167	14.5	25.5		58.7167	14.5	24
39.8	12.4	23.3	20.8		39.8	12.4	25.8	22.9		39.8	6	19	17.9		58.9633	14	26		58.9633	14	24.5
40	12.3	25.6	20.2		40	12.2	24.4	23		40	5.9	17.2	17.9		59.21	14	25.5		59.21	14	24.5
40.2	12.3	21.3	20.1		40.2	11.9	26.1	22.6		40.2	5.9	19.5	18.6		59.4567	14	26		59.4567	14	24
40.3	12.3	26.3	20.2		40.3	11.8	26.3	21.9		40.3	5.5	20.5	19.3		59.7033	14	26		59.7033	14	24
40.5	12.2	21.3	20.1		40.5	11.5	25	22.4		40.5	5.4	19.6	18.5		59.95	14	25.5		59.95	14	23.5
40.7	12	21.3	20.2		40.7	10.7	24.9	22.3		40.7	5.2	18.3	17.2		60.1967	14	26		60.1967	14	24.5
40.8	11.9	21.7	20.1		40.8	10.8	26.5	22.1		40.8	5.5	17.1	17.6		60.4433	14	26		60.4433	14	24
41	11.8	23.3	19.7		41	10.7	25	22.1		41	5.4	18.6	18		60.69	14	25.5		60.69	14	24
41.2	11.9	21.8	18.9		41.2	10.7	27	21.7		41.2	5.7	18.9	18.5		60.9367	14	25.5		60.9367	14	24
41.3	11.8	23.8	19		41.3	10.7	24.2	22		41.3	6.5	18.8	18.6		61.1833	14	25.5		61.1833	14	24.5
41.5	11.9	20.4	18.9		41.5	10.7	25.3	21.8		41.5	7.5	21.6	20.3		61.43	14	25.5		61.43	14	24
41.7	12	24.1	20.5		41.7	10.3	22.8	21.7		41.7	8.6	21.5	20.4		61.6767	14	26		61.6767	14	24.5
41.8	11.9	20.8	21.4		41.8	10.5	26.4	21.8		41.8	9.6	21.1	21		61.9233	14	26		61.9233	14	24
42	12	22.6	20.4		42	10.3	24.9	21.4		42	10.2	19.6	19.5		62.17	14	25.5		62.17	14	24
42.2	11.9	20.8	20.3		42.2	10.5	22.9	21.6		42.2	11.9	23.2	22.2		62.4167	14	25.5		62.4167	14	24.5
42.3	12	20.8	20.1		42.3	10.4	23.7	21.4		42.3	13.5	24.8	23		62.6633	14	26		62.6633	14	24
42.5	12	21.7	19.9		42.5	10.4	25.3	21.5		42.5	14.5	23.3	22		62.91	14	26		62.91	14	24.5
42.7	11.9	22.9	19.7		42.7	10.1	24.9	21.2		42.7	16.6	24.6	23.1		63.1567	14	25.5		63.1567	14	23.5
42.8	12	21.6	19.8		42.8	10.1	23.9	21.1		42.8	15.7	23.1	21.6		63.4033	13.5	25.5		63.4033	13.5	24
43	11.8	21.2	19.4		43	10	23.9	21.2		43	15.9	22.7	21.5		63.65	13.5	26		63.65	13.5	23.5
43.2	11.9	19.6	19.3		43.2	10.1	22.9	21.1		43.2	17.4	25	23.1		63.8967	13.5	25		63.8967	13.5	23.5
43.3	11.8	24.7	19.2		43.3	10.3	25.2	21.3		43.3	19.2	25.9	25.4		64.1433	13.5	25		64.1433	13.5	23
43.5	11.7	24.3	18.9		43.5	10.1	24.9	21.2		43.5	19.6	25.6	24.9		64.39	13.5	25.5		64.39	13.5	23.5
43.7	11.5	21.3	18.5		43.7	9.5	25.4	21.2		43.7	19	28.5	27.3		64.6367	13	24.5		64.6367	13	23
43.8	11.7	18.7	19.2		43.8	10	21.5	21		43.8	20.9	29.3	27.7		64.8833	13	25		64.8833	13	24
44	11.7	19.7	18.9		44	9.7	25.9	20.8		44	21.6	32.2	28.8		65.13	13	25.5		65.13	13	23
44.2	11.8	23.8	19.5		44.2	9.7	25.1	21.1		44.2	23.2	34.4	28.9		65.3767	13	24.5		65.3767	13	23
44.3	11.7	22	18.9		44.3	9.6	23.3	21.1		44.3	25.2	33.9	28.5		65.6233	13	24.5		65.6233	13	23
44.5	11.6	21.9	21.7		44.5	9.5	24.7	20.5		44.5	26.2	35.6	28.8		65.87	13	25		65.87	13	23
44.7	11.6	21.8	19.7		44.7	9.6	26.4	20.9		44.7	23.7	38	30.8		66.1167	13.5	25.5		66.1167	13.5	23.5
44.8	11.7	23	19.6		44.8	9.5	25.4	20.8		44.8	26.7	35.3	31.8		66.3633	13.5	25.5		66.3633	13.5	23
45	11.5	21.8	19.5		45	9.6	22.3	21.1		45	29	37.3	32.4		66.61	13.5	25		66.61	13.5	23.5
45.2	11.6	20.8	19.5		45.2	9.4	25.5	20.4		45.2	32.1	38.1	32.2		66.8567	13.5	25		66.8567	13.5	23.5
45.3	11.6	23.3	19.1		45.3	9.4	23.8	20.4		45.3	25.8	37.8	32.9		67.1033	13.5	25.5		67.1033	13.5	23.5
45.5	11.5	20.2	19		45.5	9.5	24.8	20.4		45.5	25.6	38.5	33		67.35	13.5	24.5		67.35	13.5	23
45.7	11.5	24.3	18.9		45.7	9.4	23.2	20.4		45.7	32.9	37.5	31.1		67.5967	13.5	25.5		67.5967	13.5	23.5
45.8	11.8	22.2	18.7		45.8	9.2	23.6	20.3		45.8	35.5	39	30.9		67.8433	13.5	25.5		67.8433	13.5	23
46	11.8	21.5	19.9		46	9.2	23.5	20.2		46	30.9	40.3	34.3		68.09	13.5	24.5		68.09	13.5	23.5
46.2	12	22.1	20		46.2	9.3	24	20.3		46.2	37.1	35.2	34.3		68.3367	13.5	25		68.3367	13.5	23
46.3	12.4	23.7	19.4		46.3	9.2	23.4	20.3		46.3	32	39.7	34.3		68.5833	13.5	25		68.5833	13.5	23
46.5	12.8	26.7	20.3		46.5	9.2	23.6	20.3		46.5	36.4	40.2	33.7		68.83	13.5	25		68.83	13.5	23
46.7	13	22.1	20.6		46.7	9.2	24.2	20.3		46.7	36.7	41.3	33.4		69.0767	13.5	24.5		69.0767	13.5	23.5
46.8	13.4	24.1	20.7		46.8	9.1	23.4	20.3		46.8	35.3	41.2	31		69.3233	13.5	24.5		69.3233	13.5	23.5
47	13.8	25.6	21.4		47	9.2	23.7	20.2		47	34.3	38.1	36.2		69.57	13.5	24.5		69.57	13.5	23.5
47.2	13.9	24.5	22.4		47.2	9.2	24	20.2		47.2	34.3	37.1	35.1		69.8167	13.5	25		69.8167	13.5	23.5
47.3	14.2	22.7	21.9		47.3	9.1	24	20.3		47.3	29.6	37.3	29.3		70.0633	13.5	24.5		70.0633	13.5	23.5
47.5	14.6	23.1	22.6		47.5	9.1	23.2	20.3		47.5	28.2	33.1	27.6		70.31	13.5	25.5		70.31	13.5	23
47.7	14.5	24.6	23.2		47.7	9.1	24.4	20.3		47.7	30.2	33.6	28.8		70.5567	13.5	28.5		70.5567	13.5	23.5
47.8	14.7	26.8	23		47.8	9.1	23.4	20.2		47.8	29.2	29.9	28.8		70.8033	14	31		70.8033	14	24
48	15.2	25.4	23.6		48	9.1	23.7	20.4		48	29.7	30.4	27.4		71.05	14	26		71.05	14	24
48.2	16	29.7	24		48.2	9.1	24.7	20.2		48.2	30	30.9	27		71.2967	14	26		71.2967	14	24
48.3	16	28.9	23.7		48.3	9.1	22.7	20.2		48.3	29.8	32.4	25.9		71.5433	14.5	26.5		71.5433	14.5	25
48.5	15.6	29.3	24.2		48.5	9	21.6	20		48.5	29.7	30.7	26.4		71.79	15	26		71.79	15	25.5
48.7	16.3	27.2	24.4		48.7	9	20.9	19.9		48.7	27.6	29.4	25.6		72.0367	15	26.5		72.0367	15	25
48.8	16.3	29	25.3		48.8	8.9	23.5	20.1		48.8	28.8	31.8	26.3		72.2833	15.5	28.5		72.2833	15.5	25.5
49	16.1	27	24.5		49	9	23	20.3		49	28	30.1	25.7		72.53	16	27.5		72.53	16	26
49.2	16.3	30.1	24.6		49.2	8.9	24.9	20		49.2	29.3	29.7	26.1		72.7767	16	32.5		72.7767	16	25
49.3	16.6	29	24.8		49.3	9	21.2	20		49.3	30.8	30.5	26		73.0233	16	28		73.0233	16	17
49.5	16.5	30.5	25.7		49.5	8.9	21.2	19.9		49.5	30	31.9	27.4		73.27	15.5	27		73.27	15.5	15.5
49.7	16.4	28.2	25.6		49.7	8.9	23.4	19.7		49.7	28	30.4	26		73.5167	16	27		73.5167	16	16
49.8	17.7	30.1	26.7		49.8	8.9	22.5	19.7		49.8	28	30.5	26.6		73.7633	16.5	27.5		73.7633	16.5	17
50	18.1	48	33.5		50	8.9	25.3	20		50	28.5	31.5	27.9		74.01	16	27		74.01	16	16.5
50.2	19.3	31.6	29.2		50.2	9	25.3	19.9		50.2	25.6	30.5	26.5		74.2567	16	27.5		74.2567	16	16
50.3	21.1	42.1	31.2		50.3	9	25.1	19.9		50.3	27.5	29.7	26		74.5033	17	29.5		74.5033	17	17.5
50.5	22.6	43.4	35.4		50.5	9	22.6	20		50.5	25.1	29.2	25.5		74.75	17.5	29		74.75	17.5	18
50.7	20.2	36.6	31		50.7	9	25.9	20		50.7	29.5	27.8	26		74.9967	17.5	29		74.9967	17.5	18
50.8	21.4	36.2	31.4		50.8	9	25.8	20		50.8	24.8	29.4	26.6		75.2433	18.5	30		75.2433	18.5	19
51	21.3	32.2	30		51	9	25.6	19.8		51	24.3	30.5	24.8		75.49	19.5	31		75.49	19.5	20
51.2	20.8	30.7	29.7		51.2	9	20.7	19.9		51.2	24.5	29.5	25.5		75.7367	19.5	30.5		75.7367	19.5	20
51.3	20.3	34	28.4		51.3	9.1	23.6	20.2		51.3	25	29.9	26.4		75.9833	19.5	31		75.9833	19.5	20
51.5	19.8	30.1	27.3		51.5	9.1	24.8	20.4		51.5	24	32.1	26.9		76.23	19.5	31		76.23	19.5	20
51.7	18.7	27.9	26.5		51.7	9.1	24.1	20.4		51.7	25.5	32.1	29.5		76.4767	18.5	29.5		76.4767	18.5	19
51.8	17.8	30.5	25.7		51.8	9.2	23.6	20.3		51.8	23.4	34.9	31.2		76.7233	18.5	30		76.7233	18.5	19
52	17.6	31.8	25.8		52	9.2	23.6	20.2		52	22.5	33.6	30.9		76.97	19	29.5		76.97	19	19
52.2	17.9	30.8	25.7		52.2	9.2	23.7	20.3		52.2	21.4	31.4	27.7		77.2167	19	30		77.2167	19	19
52.3	17.2	31.6	25.5		52.3	9.3	23.8	20.4		52.3	20.6	33.6	29.7		77.4633	19	30		77.4633	19	19.5
52.5	16.9	27.7	24.9		52.5	9.3	24.1	20.4		52.5	18.8	27.2	25.5		77.71	19	37		77.71	19	19.5
52.7	16.8	34.8	26.2		52.7	9.3	23.7	20.4		52.7	17.6	27.3	25.3		77.9567	19	30		77.9567	19	19
52.8	17	26.1	24.8		52.8	9.4	23.9	20.5		52.8	16.9	30.2	26.9		78.2033	19	30		78.2033	19	19
53	17.2	29.7	25		53	9.4	25	20.5		53	16.8	27.2	25.3		78.45	18.5	31		78.45	18.5	19
53.2	17.5	26.5	25.1		53.2	9.4	24.2	20.5		53.2	16.2	29.4	26.2		78.6967	18	35		78.6967	18	18.5
53.3	17.1	29.2	24.3		53.3	9.4	23.4	20.5		53.3	15.8	25.9	24.5		78.9433	18	29.5		78.9433	18	18
53.5	16.7	27.6	24.4		53.5	9.5	25.4	20.7		53.5	15.3	27.2	24.7		79.19	17.5	28.5		79.19	17.5	18
53.7	16.4	26.3	24.3		53.7	9.5	24.5	20.4		53.7	15.1	26.8	24.6		79.4367	17	28		79.4367	17	17
53.8	16.6	28.2	24.4		53.8	9.5	22.8	20.7		53.8	14.6	27	24.8		79.6833	16	27.5		79.6833	16	16
54	16.8	27.2	24.8		54	9.5	24.8	20.9		54	14.1	24.4	23.2		79.93	15.5	26.5		79.93	15.5	15
54.2	17	26.9	24		54.2	9.5	24.9	20.7		54.2	14.4	24.6	23		80.1767	14.5	26		80.1767	14.5	14.5
54.3	16.9	26.6	24.5		54.3	9.5	24.3	20.4		54.3	14	26.5	24.3		80.4233	14	26		80.4233	14	14
54.5	16.6	24.9	24.7		54.5	9.5	23.7	20.5		54.5	13.9	27.1	24.6		80.67	14	25		80.67	14	13.5
54.7	16.4	25.7	24.5		54.7	9.5	24.4	20.5		54.7	14.3	26.5	24.1		80.9167	13.5	25		80.9167	13.5	13
54.8	16.3	29	23.6		54.8	9.5	23.7	20.4		54.8	14.3	28.1	24.4		81.1633	13	24		81.1633	13	12.5
55	16	28.1	24		55	9.5	23.7	20.4		55	14.4	25.5	23.7		81.41	13	24.5		81.41	13	12.5
55.2	15.8	27.9	24.1		55.2	9.5	24.2	20.6		55.2	14.3	25	23.5		81.6567	12.5	24		81.6567	12.5	12.5
55.3	15.8	28.8	23.7		55.3	9.5	22.8	20.5		55.3	13.9	25.4	23.5		81.9033	12.5	23.5		81.9033	12.5	12
55.5	15.6	29.4	23.6		55.5	9.6	22.4	20.7		55.5	13.8	26.4	24.3		82.15	12.5	24		82.15	12.5	12
55.7	15.5	25.9	22.8		55.7	9.6	22.1	20.9		55.7	13.7	25.8	23.6		82.3967	12	23.5		82.3967	12	11.5
55.8	15.3	25.7	23.2		55.8	9.5	24.1	20.8		55.8	13.4	27	24.2		82.6433	12	24		82.6433	12	11.5
56	15.2	23.8	23		56	9.7	29	22.3		56	13.2	25.2	22.9		82.89	11.5	23.5		82.89	11.5	11.5
56.2	15.1	28.4	23		56.2	10.4	28.6	23.7		56.2	13.3	24.6	22.9		83.1367	11.5	22.5		83.1367	11.5	11
56.3	15.2	25.6	23.1		56.3	10.4	28.7	24.3		56.3	12.9	25	22.7		83.3833	11.5	22.5		83.3833	11.5	11
56.5	15.2	23.6	23		56.5	10.6	28.9	24.4		56.5	12.9	25.7	22.7		83.63	11.5	22.5		83.63	11.5	11
56.7	15.2	27.8	23.1		56.7	10.7	29.2	24.8		56.7	12.8	25	22.8		83.8767	11.5	22.5		83.8767	11.5	11
56.8	15.1	25	23.2		56.8	10.9	30.2	24.9		56.8	12.5	23.6	21.9		84.1233	11	22.5		84.1233	11	10.5
57	15.1	24.3	23		57	10.9	29.4	25.2		57	12.5	25	22.7		84.37	11	23		84.37	11	10.5
57.2	14.9	24.7	23.1		57.2	10.5	29.2	24.9		57.2	12.1	24.5	22.4		84.6167	11	23		84.6167	11	10.5
57.3	14.9	28.6	22.9		57.3	10.6	27.6	24.8		57.3	11.8	23.6	21.8		84.8633	11	23		84.8633	11	10.5
57.5	14.9	24.6	22.7		57.5	11	29.6	24.9		57.5	11.7	24.2	22.1		85.11	11	22.5		85.11	11	10.5
57.7	14.7	25.4	22.8		57.7	11.1	28.5	25		57.7	11.7	23.8	22		85.3567	10.5	22		85.3567	10.5	10
57.8	14.8	23.8	23		57.8	11.6	29.9	25.7		57.8	11.5	22.7	21.4		85.6033	10.5	21.5		85.6033	10.5	10
58	14.7	25.5	23		58	11.6	30.5	26		58	11.3	23.3	20.9		85.85	10.5	22		85.85	10.5	10
58.2	14.7	24.3	23.3		58.2	12.3	31.5	26.7		58.2	11.3	22.1	20.9		86.0967	10	22		86.0967	10	10
58.3	14.7	26.2	23.1		58.3	13	31.2	27.2		58.3	11	23.9	21.3		86.3433	10	22		86.3433	10	9.5
58.5	14.6	27.4	23		58.5	13.1	31.1	27.4		58.5	10.9	23.3	21.9		86.59	10	21.5		86.59	10	9.5
58.7	14.5	27.2	22.6		58.7	13.8	32.9	28		58.7	10.8	22.9	21.1		86.8367	10	21.5		86.8367	10	9.5
58.8	14.4	25	22.5		58.8	13.8	27.8	27.9		58.8	10.6	23.1	20.8		87.0833	10	22		87.0833	10	9.5
59	14.4	24.1	22.2		59	14.5	30.3	26.9		59	10.6	22.7	21.1		87.33	10	21.5		87.33	10	9.5
59.2	14.3	24.7	22.2		59.2	16.9	33.1	28.1		59.2	10.4	24.4	21.3		87.5767	10	21.5		87.5767	10	9.5
59.3	14.3	23.4	22.2		59.3	15.8	32.5	29.2		59.3	10.4	22.3	20.3		87.8233	10	21		87.8233	10	9.5
59.5	14.1	25	22		59.5	16	32.3	29.2		59.5	10.4	24.2	21.6		88.07	10	21.5		88.07	10	9.5
59.7	14.2	24.4	22.3		59.7	17.4	35.6	30		59.7	10.2	22.1	20.3		88.3167	10	21		88.3167	10	9.5
59.8	14.1	25.1	22		59.8	16.9	34.2	30.1		59.8	10.1	22.2	20.3		88.5633	10	21		88.5633	10	9.5
60	14.3	20.4	25.6		60	16.7	31.3	28.8		60	9.9	23.9	21		88.81	10	21.5		88.81	10	9.5
60.2	14.2	23.3	22.7		60.2	15.9	29.9	27.7		60.2	9.9	21.6	20.3		89.0567	10	21.5		89.0567	10	9.5
60.3	14.4	33.6	29.4		60.3	17.9	33.4	28.9		60.3	10	21.8	20.4		89.3033	10	21.5		89.3033	10	9.5
60.5	14.1	25.8	23		60.5	19	32.8	30.7		60.5	9.8	23.3	21.2		89.55	10	22		89.55	10	10
60.7	14.1	26.1	22.4		60.7	20.7	31.4	30.3		60.7	9.8	22.4	20.4		89.7967	10	22		89.7967	10	10
60.8	13.8	25.3	22.3		60.8	20.6	36.2	32.6		60.8	9.7	22.3	20.2		90.0433	10.5	21.5		90.0433	10.5	10
61	13.7	22.9	22.3		61	21.8	39.7	34.2		61	9.4	23.2	20.4		90.29	10.5	21.5		90.29	10.5	10
61.2	13.6	25.1	22		61.2	20.2	35.6	33.3		61.2	9.3	23	20.1		90.5367	10.5	21.5		90.5367	10.5	10
61.3	13.5	25.1	21.3		61.3	21.4	39.3	33.1		61.3	9.1	23.3	20.5		90.7833	10.5	21.5		90.7833	10.5	10
61.5	13.3	22	20.9		61.5	22.1	37.6	34.4		61.5	9.2	20.6	19.3		91.03	10.5	21.5		91.03	10.5	10
61.7	13.3	23.4	21.2		61.7	20.7	30.7	30.8		61.7	8.9	20	19.4		91.2767	10.5	21.5		91.2767	10.5	10
61.8	13.3	23.2	20.6		61.8	20.7	34.3	31.2		61.8	8.7	21.8	19.3		91.5233	10	21.5		91.5233	10	10
62	13.1	24	21.1		62	20.4	32.9	30.5		62	8.5	21.6	19.9		91.77	10.5	22		91.77	10.5	10
62.2	13.2	24.9	21.1		62.2	20.4	30.8	28.6		62.2	8.1	21.7	19.7		92.0167	10.5	21.5		92.0167	10.5	10
62.3	13.2	22.4	21.1		62.3	19.3	27.7	26.6		62.3	7.9	20.3	18.8		92.2633	10.5	22		92.2633	10.5	10
62.5	13.4	23.2	20.7		62.5	19.4	29.5	27		62.5	7.9	20	18.4		92.51	10.5	21.5		92.51	10.5	10
62.7	13.4	22.9	21		62.7	19.9	29.3	26.5		62.7	7.9	21.2	19		92.7567	10.5	22		92.7567	10.5	10
62.8	13.4	23.3	20.4		62.8	19.6	28.1	26.2		62.8	7.6	21.3	18.5		93.0033	10.5	22		93.0033	10.5	10
63	13.5	24.1	20.9		63	17.9	27.9	25.9		63	7.3	20.6	18.6		93.25	10.5	22		93.25	10.5	10
63.2	13.3	25.8	20.9		63.2	16.9	25.8	24		63.2	7.2	19	17.3		93.4967	10.5	21.5		93.4967	10.5	10
63.3	13.1	22.6	20.9		63.3	16.4	27.5	23.2		63.3	7	20	18.4		93.7433	10.5	21.5		93.7433	10.5	10
63.5	12.9	23.2	21		63.5	16.3	24	22.9		63.5	6.9	18.7	17.6		93.99	10.5	22.5		93.99	10.5	10
63.7	12.8	25.3	21.1		63.7	15.9	26.6	23.1		63.7	6.8	19.3	17.8		94.2367	11	23		94.2367	11	10.5
63.8	12.7	26.2	20.6		63.8	15.6	25.2	22.4		63.8	6.5	20.2	17.3		94.4833	11	22.5		94.4833	11	11
64	12.7	30.4	21.8		64	15.1	24.3	21.3		64	6.2	19.3	17.5		94.73	11.5	23		94.73	11.5	11.5
64.2	12.6	24.1	20.9		64.2	14.6	26.6	21.1		64.2	6.2	16.7	16.1		94.9767	12	23.5		94.9767	12	12
64.3	12.6	21.1	20.6		64.3	14.2	21.5	20.6		64.3	5.9	20.8	17.7		95.2233	12	23.5		95.2233	12	12.5
64.5	12.7	23.3	20.2		64.5	14	20.5	20.3		64.5	5.9	17.3	16.4		95.47	12.5	24.5		95.47	12.5	13
64.7	12.9	22.5	20.7		64.7	13.9	28.3	23		64.7	5.7	16.4	15.5		95.7167	13.5	25.5		95.7167	13.5	14
64.8	13	22.1	23.6		64.8	13.7	26.3	23.1		64.8	5.6	16.9	15.9		95.9633	14.5	26.5		95.9633	14.5	15
65	12.9	26	21.4		65	13.6	29.2	23.1		65	5.9	17.5	16.7
65.2	13	25.9	21.3		65.2	13.5	26.9	23.1		65.2	5.9	16.8	16
65.3	12.9	22.8	21		65.3	13.5	27.2	22.9		65.3	6.4	18.4	17.3
65.5	12.7	23.8	20.8		65.5	13.3	25.2	22.9		65.5	7.6	21.4	18.9
65.7	12.8	22.2	20.7		65.7	13.3	28.7	24.7		65.7	9	23.6	20.8
65.8	12.8	25.9	20.9		65.8	13.3	28.9	25.2		65.8	10.1	22.4	20.9
66	12.9	25.4	20.9		66	13.1	28.5	25.1		66	11.3	21.8	20.8
66.2	12.9	32.6	29.4		66.2	13	28.7	25.1		66.2	12.5	23.7	22.8
66.3	13.2	24.4	22.2		66.3	12.7	27.8	24.9		66.3	13.6	26.1	24
66.5	13.1	23.7	21.5		66.5	12.6	27.9	24.4		66.5	14.5	26.6	23.7
66.7	12.8	22.2	21.4		66.7	12.7	27.7	24.6		66.7	14.4	26.2	24.2
66.8	13	25.4	21.1		66.8	12.6	29.3	24.6		66.8	16.3	27.1	25.6
67	13	22	21.1		67	12.4	28.5	24.1		67	17.2	26.2	24.4
67.2	13	24	22.5		67.2	12.3	28	24.2		67.2	18.3	26.8	25.6
67.3	13.1	25.8	21.3		67.3	12.2	28.2	24		67.3	17.3	26.2	24.8
67.5	13.1	22.3	21.4		67.5	12.1	27.5	23.9		67.5	18.3	27.7	24.9
67.7	13.2	24.3	21.4		67.7	12	28	23.9		67.7	18.9	30.6	26.2
67.8	13.1	23.8	21.5		67.8	11.9	27.8	23.7		67.8	20.5	30.9	27.6
68	13.1	25.4	21		68	11.7	27.2	23.5		68	23	31.1	28.9
68.2	13.3	24.8	21.2		68.2	11.6	26.1	23.8		68.2	25.1	32.2	28.8
68.3	13.1	24.1	21.1		68.3	11.6	24.6	23.5		68.3	23.6	34.9	29.8
68.5	13.2	26.4	21.1		68.5	11.5	28.6	23.2		68.5	23.2	36.2	30.1
68.7	13.3	26	21.1		68.7	11.5	26.8	23.5		68.7	23.5	37.1	31.7
68.8	13.2	24	20.9		68.8	11.6	27.9	23.5		68.8	24.1	37.2	31.5
69	13.2	22.7	21		69	11.6	25.1	23.5		69	25.9	39.1	33.6
69.2	13.2	23	20.6		69.2	11.6	26.7	23.6		69.2	25.3	40	34
69.3	13.2	25.6	20.9		69.3	11.6	28.6	23.5		69.3	25.2	41.2	34.3
69.5	13.3	25	20.8		69.5	11.9	28.6	23.7		69.5	26.2	40.9	34.2
69.7	13.3	21.8	20.7		69.7	11.7	27.8	23.6		69.7	27.1	40.1	33.2
69.8	13.5	26.1	21.1		69.8	11.9	26.7	23.7		69.8	28.1	41.9	31.6
70	13.7	26	21.2		70	11.8	26	23.8		70	29.8	40.9	36
70.2	14	23.3	21.7		70.2	11.8	27.1	23.4		70.2	32.4	42.3	39.4
70.3	14.1	22.6	21.4		70.3	11.6	26.8	23.5		70.3	30.1	41.5	35.3
70.5	14.3	26.7	22.2		70.5	11.5	28	23.3		70.5	28.4	41.9	34.2
70.7	14.7	24.5	22.8		70.7	11.5	27.4	23.3		70.7	28.6	40.9	32.1
70.8	15	26.1	23.1		70.8	11.4	29.1	23.4		70.8	28.8	41.3	29.5
71	15.3	24.6	23.3		71	11.4	27.3	23.2		71	28.8	39	34.8
71.2	15.7	26.2	23.9		71.2	11.3	27.7	23.1		71.2	29.3	39.3	36.2
71.3	15.8	26.3	23.8		71.3	11.2	26	22.9		71.3	29.3	40.7	33.3
71.5	15.9	28.2	24		71.5	11.2	28.1	23.1		71.5	28.7	38.8	32.7
71.7	16.1	31.7	23.9		71.7	11.3	26.9	23.1		71.7	29.2	42.4	32.4
71.8	16.7	31	25.2		71.8	11.4	26.9	23.1		71.8	30.6	39.1	33
72	17.1	29.4	26.6		72	11.3	27.1	23.3		72	31.1	42.8	33
72.2	17.1	28.5	26.4		72.2	11.4	26.2	23.3		72.2	30.3	41.6	32.6
72.3	17.6	29	26.3		72.3	11.4	26.7	23.3		72.3	31	41.9	31.8
72.5	17.6	29.7	26.5		72.5	11.3	26.7	23.2		72.5	30.9	40.1	32.3
72.7	18.8	32.9	28		72.7	11.3	26.4	23.1		72.7	31.9	43	32.5
72.8	20.8	37	28.5		72.8	11.3	26.5	23.1		72.8	31.6	42.1	32.2
73	24.5	39.3	30.9		73	11.1	26.8	23.1		73	32	38	30.5
73.2	20.8	33	30.5		73.2	11.1	26.3	22.9		73.2	32.6	37.9	31.4
73.3	20.1	33.7	30		73.3	11.1	26.6	23		73.3	31.3	35	29.7
73.5	21.7	38.6	31.2		73.5	10.9	27.8	23		73.5	31.1	36.2	30.2
73.7	21.3	38.7	31.5		73.7	10.6	26.6	22.3		73.7	31.6	36	29.8
73.8	22.7	37.1	32.3		73.8	10.7	26.2	22.9		73.8	32.2	35.3	29.7
74	23.4	41.3	33.2		74	10.7	28.2	22.6		74	30.9	36.8	31.6
74.2	22	33.2	31.4		74.2	10.7	26.8	22.3		74.2	30.6	35.8	31.2
74.3	21.1	32	28.9		74.3	10.7	25.3	22.8		74.3	30.2	35	30.2
74.5	21	34.7	28.7		74.5	10.7	24.6	22.9		74.5	28.9	34.3	29.7
74.7	22.2	34.8	31.3		74.7	10.7	26.6	22.4		74.7	28.1	31.6	28.5
74.8	21.9	34.4	29.9		74.8	10.7	25.8	22.7		74.8	28	31.8	28.3
75	21.3	33.1	28.9		75	10.7	28.3	22.7		75	27.5	32.1	26.2
75.2	20.3	31.8	28.3		75.2	10.7	27.1	22.8		75.2	27.5	31	27.1
75.3	20.8	30.8	28.4		75.3	10.6	24	22.6		75.3	27.9	30.4	27
75.5	21.1	32.3	28.5		75.5	10.6	25.3	22.8		75.5	26.7	32.1	26.9
75.7	23.3	37.9	32.1		75.7	10.6	24.9	22.7		75.7	28.3	33.2	29.9
75.8	22.6	52.9	33		75.8	10.7	27	22.6		75.8	25	28.1	24.7
76	25.4	40.9	33.3		76	10.5	23.8	22.7		76	28.1	34.8	32.2
76.2	26.2	36.6	34.5		76.2	10.5	25.3	22.7		76.2	27	34.3	31.1
76.3	27.9	39.1	34.6		76.3	10.5	25.5	22.4		76.3	25.8	33.9	30.5
76.5	26.3	35.6	33.9		76.5	10.6	27.1	22.4		76.5	24.5	33.2	30.4
76.7	25.3	38.1	32.7		76.7	10.7	27.2	22.5		76.7	23.1	33.2	30.3
76.8	24.9	33.9	31.5		76.8	10.6	26.3	22.6		76.8	22.1	33.5	30.7
77	26.3	31.9	30.3		77	10.6	24.5	22.5		77	21.1	33.2	30.5
77.2	25.8	33	32.3		77.2	10.5	25.9	22.1		77.2	20.1	32	29.7
77.3	23.3	34.5	32.9		77.3	10.6	25.8	22.7		77.3	19.7	32	29.8
77.5	23.2	32.7	29.3		77.5	10.5	26.7	22.4		77.5	19.3	30.8	28.5
77.7	21.8	26.7	27.3		77.7	10.6	25.9	22.3		77.7	18.9	32.5	29.5
77.8	20.7	25.7	24.4		77.8	10.5	25.6	22.2		77.8	18.5	30.4	28
78	20.2	26.3	23.4		78	10.4	26.1	22.3		78	18	31.1	28.4
78.2	20.2	25.3	23.3		78.2	10.5	25.3	22.3		78.2	17.8	32.5	29.2
78.3	20.2	29.8	23.7		78.3	10.4	25.8	22.2		78.3	17.5	28.3	26.7
78.5	20	32.1	23.4		78.5	10.3	26	22.1		78.5	17.3	30.4	27.7
78.7	19.8	37.6	24.9		78.7	10.2	25.5	22.2		78.7	17	30.5	27.9
78.8	18.7	29.2	26.7		78.8	10.3	26	22.2		78.8	16.9	30.8	27.5
79	18.7	28.1	25.9		79	10.4	25.2	22.2		79	16.5	30.2	27.5
79.2	18.4	28.2	25.7		79.2	10.3	26.3	22.1		79.2	16.4	29.3	27.1
79.3	18.2	29.2	25.5		79.3	10.5	26	22.3		79.3	16.2	28.8	26.9
79.5	17.7	29.6	25.7		79.5	10.7	24.3	22.8		79.5	15.8	30	27.2
79.7	17.7	31.5	25.3		79.7	11	26.8	22.9		79.7	15.8	28.2	26.2
79.8	17.5	26.6	25		79.8	11	26.4	22.9		79.8	15.3	27.3	25.4
80	17.1	25.8	25		80	11.2	27.8	23.1		80	14.8	27.7	25.4
80.2	16.7	29.7	24.7		80.2	11.8	28.4	23.6		80.2	14.9	27.4	25.1
80.3	16.6	25.8	24.2		80.3	12.2	27.3	24.3		80.3	14.7	26.1	24.5
80.5	16.2	25.6	23.7		80.5	12.3	27.5	24.2		80.5	14.7	28	25.5
80.7	16.2	27.2	23.6		80.7	11.8	26.8	23.9		80.7	14.1	27.3	24.8
80.8	16.1	27	23.8		80.8	12.3	27.4	23.8		80.8	14	28	25
81	16	27.7	23.4		81	12.7	26.6	25		81	14.1	26	23.9
81.2	15.9	25.1	23.7		81.2	13.2	29.4	25		81.2	14.1	27.2	24.4
81.3	15.9	27.8	23.5		81.3	13.4	31.2	25.8		81.3	13.9	28.7	25.2
81.5	15.9	27.3	23.6		81.5	13.4	29	25.5		81.5	13.7	28.7	25.4
81.7	16.2	25.8	23.7		81.7	13	28.7	24.8		81.7	13.7	28.8	25.5
81.8	16.1	27.3	23.9		81.8	13.3	29.8	24.9		81.8	13.5	27.1	24.7
82	16	26.7	23.8		82	13.9	29.6	25.5		82	13.3	24.8	23.5
82.2	16	27.9	23.7		82.2	14.7	31.7	26.7		82.2	12.9	26.6	24.3
82.3	15.8	27.1	23.8		82.3	14.3	31.4	26.8		82.3	12.5	24.7	22.9
82.5	15.5	26.2	23.1		82.5	15.4	32.9	27.9		82.5	12.2	24.8	23.1
82.7	15.2	27.8	23.1		82.7	15.1	30.8	27.3		82.7	12.1	23.3	21.9
82.8	15.2	24	23.4		82.8	14.5	32.2	27		82.8	11.8	25.2	23
83	15.1	26.2	23.1		83	14.5	31.2	27.3		83	11.6	25.6	22.9
83.2	15.2	26.5	23.1		83.2	15.1	32.8	27.6		83.2	11.5	23.5	21.8
83.3	15.4	26.9	23		83.3	15.5	33	28.2		83.3	11.2	23.1	21.5
83.5	15.4	27.3	23.2		83.5	15.9	32.8	28.1		83.5	11.1	26.1	22.9
83.7	15.5	26.3	22.8		83.7	15.3	32.9	28		83.7	10.7	23.3	21.5
83.8	15.5	25.3	22.7		83.8	16.4	32.1	28.6		83.8	10.7	22.6	21.1
84	15.4	27.5	23		84	15.6	33.5	28.6		84	10.5	23.3	21.3
84.2	15.4	23.6	22.9		84.2	15.2	32.8	27.7		84.2	10.3	23.1	21
84.3	15.4	26.2	22.8		84.3	14.9	31.9	27.6		84.3	10	24.4	21.6
84.5	15.4	27.1	22.5		84.5	14.4	30.3	26.7		84.5	9.9	23.7	21.3
84.7	15.4	25.9	22.8		84.7	14.3	31.4	26.6		84.7	10	23.5	21.3
84.8	15.3	26.2	22.6		84.8	14.2	30.6	26.7		84.8	9.7	22.4	20.6
85	15.1	26.2	22.6		85	15.8	32.8	27.8		85	9.6	22.1	20.6
85.2	15	26.9	22.7		85.2	15.7	34	28.3		85.2	9.4	20	19.7
85.3	14.9	23.7	22.8		85.3	14.5	31.3	27.2		85.3	9.4	21.4	20
85.5	14.6	24.1	22.8		85.5	14.7	33	27.6		85.5	9.1	23.8	21.1
85.7	14.6	24.4	22		85.7	14.5	30.3	26.9		85.7	8.9	22.5	20.5
85.8	14.6	23.9	21.9		85.8	16.9	33.1	28.1		85.8	8.5	21.1	19.3
86	14.6	22.5	21.9		86	15.8	32.5	29.2		86	8.5	20.2	19.2
86.2	14.5	24.3	21.9		86.2	16	32.3	29.2		86.2	8.3	21	19.1
86.3	14.5	25.6	21.6		86.3	17.4	35.6	30		86.3	8.3	21.2	19.4
86.5	14.2	25	21.7		86.5	16.9	34.2	30.1		86.5	8.1	22.4	20.3
86.7	14.1	24.5	21.8		86.7	16.7	31.3	28.8		86.7	8.1	19.5	18.6
86.8	13.7	25.9	21.9		86.8	15.9	29.9	27.7		86.8	7.8	21.7	19.7
87	13.7	27	21.7		87	17.9	33.4	28.9		87	7.8	20.4	19
87.2	13.7	26.3	21.2		87.2	19	32.8	30.7		87.2	7.6	20	18.8
87.3	13.7	23.1	20.9		87.3	20.7	31.4	30.3		87.3	7.6	20.4	19.3
87.5	13.8	23.8	21		87.5	20.6	36.2	32.6		87.5	7.6	21.1	19.8
87.7	13.8	23.9	20.5		87.7	21.8	39.7	34.2		87.7	7.4	21	19
87.8	13.7	25.8	20.7		87.8	20.2	35.6	33.3		87.8	7.3	19.1	18.1
88	13.8	25.7	21.1		88	21.4	39.3	33.1		88	7.2	21.4	19.1
88.2	13.7	23.3	21.3		88.2	22.1	37.6	34.4		88.2	6.9	18.9	18.5
88.3	13.8	25.3	21.9		88.3	20.7	30.7	30.8		88.3	7	20.1	18.9
88.5	13.9	25.1	21.6		88.5	20.7	34.3	31.2		88.5	6.9	20.5	18.9
88.7	13.9	23.6	21.9		88.7	20.4	32.9	30.5		88.7	6.8	20.8	19.1
88.8	14	27.2	21.7		88.8	20.4	30.8	28.6		88.8	7	21.3	19.7
89	14.1	26	22.9		89	19.3	27.7	26.6		89	7.5	19.4	18.4
89.2	14	22.2	22.1		89.2	19.4	29.5	27		89.2	7.9	20.9	19.9
89.3	13.9	26.2	21.8		89.3	19.9	29.3	26.5		89.3	8.7	20.2	19.5
89.5	13.7	24	21.9		89.5	19.6	28.1	26.2		89.5	9.8	20.7	20.4
89.7	13.5	25.2	21.2		89.7	17.9	27.9	25.9		89.7	11	24.6	22.8
89.8	13.5	24.1	20.6		89.8	16.9	25.8	24		89.8	12.1	23.5	22.1
90	13.5	24.1	20.8		90	16.4	27.5	23.2		90	12.9	24.6	23.5
90.2	13.6	21.4	21		90.2	16.3	24	22.9		90.2	14.1	26.3	25.3
90.3	13.5	23.6	20.7		90.3	15.9	26.6	23.1		90.3	15.2	28.9	26.3
90.5	13.6	22	20.8		90.5	15.6	25.2	22.4		90.5	16.4	28.8	26.3
90.7	13.7	24.1	20.6		90.7	15.1	24.3	21.3		90.7	15.8	28.2	25.7
90.8	13.8	23.5	20.8		90.8	14.6	26.6	21.1		90.8	15.2	25.9	23.9
91	13.9	22.7	21		91	14.2	21.5	20.6		91	16.2	27	24.7
91.2	13.7	26.3	21.3		91.2	14	20.5	20.3		91.2	16.3	26.1	24.9
91.3	13.8	25.2	21.2		91.3	13.9	28.3	23		91.3	17.1	26	24.9
91.5	13.9	24.5	21.4		91.5	13.7	26.3	23.1		91.5	17.6	27.4	25.2
91.7	13.9	26.2	21.6		91.7	13.6	29.2	23.1		91.7	19.9	30.5	27.4
91.8	13.9	25.8	21.6		91.8	13.5	26.9	23.1		91.8	18.9	29.2	25.3
92	13.9	25.1	21.6		92	11.9	27.8	23.7		92	20.8	30.4	25.6
92.2	13.9	25.5	21.6		92.2	11.7	27.2	23.5		92.2	22.8	33.1	28.7
92.3	13.9	23.9	21.2		92.3	11.6	26.1	23.8		92.3	22.9	34.3	29.9
92.5	13.8	38.1	22.1		92.5	11.6	24.6	23.5		92.5	22.2	31.7	27.8
92.7	13.9	22.9	22.3		92.7	11.5	28.6	23.2		92.7	22.5	30.5	28.8
92.8	13.7	25.1	21.2		92.8	11.5	26.8	23.5		92.8	24.3	32.4	29.1
93	13.8	23.8	21		93	11.6	27.9	23.5		93	23.7	33	28.5
93.2	13.8	24	21.1		93.2	11.6	25.1	23.5		93.2	22.3	31.7	27.8
93.3	13.9	23.3	21.2		93.3	11.6	26.7	23.6		93.3	23.3	35.7	30.9
93.5	13.9	23.1	21.6		93.5	11.6	28.6	23.5		93.5	23.7	33.7	30.9
93.7	13.9	23.8	21.6		93.7	11.9	28.6	23.7		93.7	24.4	36.9	29.6
93.8	14.1	25	21.7		93.8	11.7	27.8	23.6		93.8	26	39.3	30.1
94	14.2	24.9	21.3		94	11.9	26.7	23.7		94	25.6	37.4	31.9
94.2	14.4	25.2	21.1		94.2	11.8	26	23.8		94.2	25.3	34.2	31.7
94.3	14.6	27.7	21.9		94.3	11.8	27.1	23.4		94.3	23.7	34.4	28.6
94.5	14.9	23.9	22.4		94.5	11.6	26.8	23.5		94.5	23.7	35	30.6
94.7	15	25.3	22.4		94.7	11.5	28	23.3		94.7	24.9	35.5	29.4
94.8	15.2	25.5	22.4		94.8	11.5	27.4	23.3		94.8	25	35.2	28.2
95	15.4	28.3	23		95	11.4	29.1	23.4		95	25	33.3	28.5
95.2	15.4	28.4	23.2		95.2	11.4	27.3	23.2		95.2	26.5	32.2	30.1
95.3	15.5	27.5	23.5		95.3	11.3	27.7	23.1		95.3	26.9	38.9	33.5
95.5	15	26.6	23.4		95.5	11.2	26	22.9		95.5	27	37.3	31.4
95.7	15.4	27.9	23.4		95.7	11.2	28.1	23.1		95.7	27.4	39.5	32
95.8	16	25.6	23.6		95.8	11.3	26.9	23.1		95.8	29.1	39.3	33.2
96	16.1	29	23.9		96	11.4	26.9	23.1		96	29.6	42.2	33.1
