# Supplementary material for: Transcriptomic and Physiological Response of Durum Wheat Grain to Short-Term Heat Stress during Early Grain Filling
Source: Preprints.org preprint supplement (doi:10.20944/preprints202112.0111.v1), 2021-12-07
Supplement: Supplementary file 5 [file Supplementary Table3.xlsx]

## Sheet: Hoja1
Samples	Raw reads	Pseudoaligned	%
C_R1_(A)	30477655	21196757	69.5
C_R2_(B)	34065488	23939390	70.3
C_R3_(C)	25060694	18154591	72.4
HS_R1_(TR1D)	31648504	22592433	71.4
HS_R2_(TR2E)	28718304	19966750	69.5
HS_R3_(TR3L)	26684873	18524268	69.4
