# Supplementary material for: Transcriptomic and Physiological Response of Durum Wheat Grain to Short-Term Heat Stress during Early Grain Filling
Source: Preprints.org preprint supplement (doi:10.20944/preprints202112.0111.v1), 2021-12-07
Supplement: Supplementary file 7 [file Supplementary Table4.xlsx]

## Sheet: up
ensembl_gene_id	interpro_description	taestivum_eg_homolog_ensembl_gene	athaliana_eg_homolog_ensembl_gene	TF Family	Arabidopsis best hit TF	evalue	TF description	pval	qval	fc	se_fc	C_R1_(A)	C_R2_(B)	C_R3_(C)	HS_R1_(TR1D)	HS_R2_(TR2E)	HS_R3_(TR3L)
TRITD3Bv1G044280	Alpha crystallin/Hsp20 domain	TraesCS3B02G130300, TraesCS3D02G115400						1.43959e-202	6.00282e-198	2.60779	0.0858719	9.70946	9.813	9.05939	114.119	141.259	137.931
TRITD4Bv1G129640	Alpha crystallin/Hsp20 domain	TraesCS4B02G212200, TraesCS4D02G212300, TraesCS4A02G092200, TraesCS4A02G092100						1.0878e-139	2.26795e-135	1.43059	0.056859	76.3602	77.6637	85.4982	310.241	346.672	351.56
TRITD2Av1G163520	FKBP-type peptidyl-prolyl cis-trans isomerase domain	TraesCS2A02G277100, TraesCS2D02G276000, TraesCS2B02G294500	AT3G25230, AT5G48570					1.48445e-136	2.06328e-132	1.7864	0.0718231	9.72116	9.63592	8.41533	52.4026	52.9434	61.5384
TRITD2Bv1G010840	Heat shock protein Hsp90 family	TraesCS2B02G047400, TraesCS2D02G033200, TraesCS2A02G033700	AT5G52640					1.68124e-119	1.75261e-115	2.10733	0.090666	4.21303	3.18699	4.13866	30.6937	33.3371	30.8936
TRITD2Bv1G137350	FKBP-type peptidyl-prolyl cis-trans isomerase domain	TraesCS2B02G294500, TraesCS2D02G276000, TraesCS2A02G277100	AT3G25230, AT5G48570					3.24195e-115	2.70365e-111	1.30808	0.0573337	59.041	57.3725	50.4732	206.447	197.595	215.718
TRITD0Uv1G009860	Heat shock protein Hsp90 family	TraesCS2B02G047400, TraesCS2D02G033200, TraesCS2A02G033700	AT5G52640					3.92427e-113	2.72723e-109	1.28242	0.0567334	14.4794	13.1342	15.2564	51.6132	51.2885	52.2513
TRITD3Bv1G044290	Alpha crystallin/Hsp20 domain	TraesCS3B02G130400, TraesCS3A02G113100, TraesCS4D02G145500						3.42553e-111	2.04054e-107	3.05935	0.136541	3.32458	2.8225	2.71173	53.4649	71.9764	67.9223
TRITD5Av1G157030	Alpha crystallin/Hsp20 domain	TraesCS5A02G257700, TraesCS5D02G266000, TraesCS5B02G257000						1.19362e-94	6.22146e-91	1.94177	0.0940769	5.07994	5.43196	4.5955	34.1104	36.5555	35.4508
TRITD3Bv1G012590	Alpha crystallin/Hsp20 domain							2.4241e-81	1.12311e-77	1.65056	0.0864069	51.7398	45.7948	42.5837	215.826	252.245	267.623
TRITD3Av1G035580	Alpha crystallin/Hsp20 domain	TraesCS4D02G145600						2.18323e-74	9.10365e-71	2.53524	0.13894	4.82367	6.76497	4.77051	62.0469	73.7468	72.4205
TRITD3Bv1G044320	Alpha crystallin/Hsp20 domain	TraesCS3B02G131000						1.43419e-68	5.43661e-65	3.68924	0.210815	1.72421	0.98228	1.31156	48.1815	62.5236	53.0563
TRITD4Av1G041210	Alpha crystallin/Hsp20 domain	TraesCS4B02G212200, TraesCS4D02G212300, TraesCS4A02G092200, TraesCS4A02G092100						3.5241e-65	1.22457e-61	1.19643	0.070174	38.6591	47.2314	41.7325	134.949	140.285	148.783
TRITD3Bv1G044350	Alpha crystallin/Hsp20 domain	TraesCS3B02G131200, TraesCS3D02G114900						8.05248e-59	2.58286e-55	2.71972	0.168183	4.08834	3.27038	2.91651	47.9974	53.6506	56.1241
TRITD6Av1G217330	COBRA, plant	TraesCS6A02G379800, TraesCS6B02G418400, TraesCS6D02G364400	AT3G02210, AT3G29810					9.64281e-51	2.68057e-47	0.919716	0.0613885	17.4091	15.524	14.5177	39.6818	40.9026	38.8479
TRITD4Bv1G147020	Heat shock protein 70 family	TraesCS4B02G243400, TraesCS4D02G243000, TraesCS4A02G066100	AT2G32120					2.59944e-45	6.37596e-42	1.26863	0.0898037	2.45881	2.20341	2.53527	8.50103	8.39292	8.86796
TRITD4Av1G023620	Heat shock protein 70 family	TraesCS4A02G066100, TraesCS4D02G243000, TraesCS4B02G243400	AT2G32120					1.15934e-44	2.68566e-41	1.34553	0.0959649	3.09698	2.37905	3.19021	11.0579	11.7874	10.4508
TRITD6Bv1G185560	Alpha crystallin/Hsp20 domain	TraesCS6B02G346700, TraesCS6A02G316200, TraesCS6D02G295500	AT5G51440, AT4G25200					1.41747e-44	3.11082e-41	1.4964	0.106834	11.4341	11.1087	8.54202	42.3611	50.5526	46.2198
TRITD4Av1G041570	Alpha crystallin/Hsp20 domain	TraesCS4A02G092600, TraesCS4D02G212500						2.93395e-44	6.11699e-41	2.51498	0.180221	1.6504	1.48674	1.76309	15.3555	24.3084	24.0666
TRITD3Av1G035590	Alpha crystallin/Hsp20 domain	TraesCS3A02G113000						7.03063e-43	1.39601e-39	3.12534	0.227684	2.01507	3.73905	4.02396	66.8148	82.3731	69.3814
TRITD7Bv1G189970	(2R)-phospho-3-sulpholactate synthase, ComA	TraesCS7B02G351000, TraesCS7D02G440200, TraesCS7A02G451100	AT4G21320					5.49354e-41	1.04123e-37	0.755972	0.0563859	45.8849	43.2789	52.4229	98.9056	101.116	102.311
TRITD5Av1G223030	Oxoglutarate/iron-dependent dioxygenase	TraesCS5B02G459100, TraesCS5D02G460700	AT3G28490, AT3G28480					8.88612e-39	1.61102e-35	1.00927	0.0774904	8.07488	7.70895	8.33445	22.5869	21.3848	22.65
TRITD7Bv1G071080	Heat shock protein Hsp90 family	TraesCS7B02G149200, TraesCS7A02G242200, TraesCS7D02G241100	AT5G56010, AT5G56000, AT5G56030					6.06769e-36	1.05421e-32	0.841419	0.067225	282.899	249.934	232.128	597.992	560.515	621.147
TRITD4Bv1G019410		TraesCS4B02G059500, TraesCS4D02G059000, TraesCS4A02G255700	AT1G17870					4.31085e-33	6.9136e-30	2.04305	0.170482	0.489642	0.363933	0.473187	2.85083	4.20733	3.48378
TRITD3Av1G181910	ClpA/B family	TraesCS3A02G274400, TraesCS3B02G308100, TraesCS3D02G273600	AT4G14670, AT4G14675, AT1G74310					7.2303e-33	1.07675e-29	0.831463	0.0696306	5.65308	5.59295	5.37048	12.9293	12.714	12.7442
TRITD3Bv1G044370	Alpha crystallin/Hsp20 domain	TraesCS3B02G131300, TraesCS3A02G112900, TraesCS3D02G114700, TraesCS3D02G114800						2.35627e-32	3.27506e-29	1.85965	0.157033	6.31659	5.6746	4.0615	29.1246	36.6257	37.8723
TRITD1Av1G198060	ClpA/B family	TraesCS1A02G340100, TraesCS1B02G352400, TraesCS1D02G342100	AT4G14670, AT4G14675, AT1G74310					3.55577e-32	4.78286e-29	0.692768	0.0586701	11.1156	10.7567	12.1802	21.7539	24.667	22.0538
TRITD7Av1G089150	Heat shock protein Hsp90 family	TraesCS7A02G242200, TraesCS7B02G149200, TraesCS7D02G241100	AT5G56010, AT5G56000, AT5G56030					5.17534e-31	6.53944e-28	0.868053	0.0749583	171.897	154.59	134.413	362.148	357.687	378.925
TRITD1Bv1G125280	Putative S-adenosyl-L-methionine-dependent methyltransferase	TraesCS1B02G213600, TraesCS1D02G202300, TraesCS1A02G198600	AT1G31850, AT4G19120					9.80025e-31	1.16757e-27	0.648956	0.0563055	30.7847	31.4322	28.3728	58.4091	62.4597	53.6044
TRITD6Av1G082720	Alpha crystallin/Hsp20 domain	TraesCS6A02G181700, TraesCS6D02G169100, TraesCS6B02G210600	AT1G52560					1.15019e-29	1.26212e-26	0.68226	0.0603153	35.1694	34.5915	31.8153	61.5245	70.4727	70.4112
TRITD1Bv1G202380	Alcohol dehydrogenase, zinc-type, conserved site	TraesCS1B02G389200, TraesCS1A02G370200, TraesCS1D02G376300	AT1G77120					3.76432e-28	4.02474e-25	1.72958	0.157215	1.23983	1.01574	0.894053	5.04241	5.95285	7.10453
TRITD1Bv1G138380	RNA recognition motif domain	TraesCS1B02G244200, TraesCS1A02G229900, TraesCS1D02G232100	AT4G02430					8.50958e-28	8.87081e-25	0.833261	0.0762531	12.6495	11.853	11.4663	27.5533	29.6524	26.1585
TRITD3Av1G036100	Glycosyl hydrolases 36	TraesCS3A02G113900, TraesCS3D02G116400, TraesCS3B02G133400	AT3G57520					1.02185e-26	1.01451e-23	0.62364	0.0582861	14.263	13.4535	14.3365	27.3682	25.8925	25.6314
TRITD3Av1G286310	Major intrinsic protein	TraesCS3A02G535300, TraesCS3B02G608500, TraesCS3D02G540900	AT4G01470					1.7514e-26	1.69837e-23	0.87583	0.0822407	30.91	40.4504	34.8122	85.4988	86.6316	82.8991
TRITD1Av1G135190	Proline dehydrogenase domain	TraesCS1A02G209100, TraesCS1D02G212400, TraesCS1B02G223300	AT5G38710, AT3G30775					2.12157e-26	2.01057e-23	0.729278	0.0685946	36.9477	41.1854	33.1006	73.9936	79.2843	77.8357
TRITD6Bv1G038830		TraesCS6B02G122200, TraesCS6A02G093300, TraesCS6D02G089000						2.22516e-26	2.06188e-23	0.588533	0.0553794	7.72512	7.39472	8.17236	15.2455	13.8937	13.0875
TRITD2Av1G228320	Tetratricopeptide repeat 1	TraesCS2A02G386800, TraesCS2D02G383600, TraesCS2B02G404400	AT1G12270, AT4G12400, AT1G62740					1.04687e-25	9.28778e-23	0.821301	0.0783547	9.46637	8.272	7.6469	18.1156	21.2444	18.6113
TRITD5Av1G145020	Chlorophyll A-B binding protein, plant	TraesCS5A02G229300, TraesCS5D02G238300, TraesCS5B02G227900	AT3G47470					1.15048e-25	9.99434e-23	0.648931	0.0619628	82.609	91.9475	76.4065	156.933	168.835	156.246
TRITD5Bv1G222550	ShKT domain	TraesCS5B02G459100, TraesCS2A02G448900, TraesCS5D02G460700	AT3G28490, AT3G28480					4.46481e-25	3.72347e-22	0.739647	0.0715064	13.2689	14.1199	12.7883	26.3256	27.0787	31.5074
TRITD7Av1G047960	RNA recognition motif domain	TraesCS7A02G152800, TraesCS7B02G056600, TraesCSU02G104300	AT4G31580, AT2G24590					1.97e-24	1.61069e-21	0.917713	0.0899663	31.8342	31.7115	25.3833	68.2792	75.2773	79.8048
TRITD7Bv1G188630	Alpha crystallin/Hsp20 domain	TraesCS7B02G347100, TraesCS3D02G114900						2.48155e-24	1.98991e-21	1.61744	0.158912	4.23554	3.64716	5.2241	17.661	24.0117	25.5047
TRITD1Av1G147120	RNA recognition motif domain	TraesCS1A02G229900, TraesCS1D02G232100, TraesCS1B02G244200	AT4G02430					3.09998e-24	2.43892e-21	0.78766	0.0775522	13.1491	12.3337	11.6069	27.8153	27.8419	26.3457
TRITD6Av1G155830	Domain of unknown function DUF676, lipase-like	TraesCS6A02G243800, TraesCS6D02G226000, TraesCS6B02G280500						4.05429e-24	3.13067e-21	0.602615	0.0594864	31.3358	28.5047	30.3671	59.3246	56.1921	50.4853
TRITD4Av1G233370	Early nodulin 93 ENOD93 protein	TraesCS4A02G392300, TraesCS7D02G087900, TraesCS7D02G088100						7.24798e-23	5.2108e-20	1.14639	0.116451	14.5592	10.4351	13.1182	38.6648	38.9664	42.6583
TRITD1Bv1G063270	Heat shock protein 70 family	TraesCS1B02G139500, TraesCS1D02G121000, TraesCS1A02G120100	AT1G79920, AT1G79930					7.82177e-23	5.528e-20	0.5879	0.0597658	31.493	32.343	28.2594	53.6361	59.51	53.4819
TRITD3Av1G053480	Oxoglutarate/iron-dependent dioxygenase	TraesCS3A02G133400, TraesCS3B02G166100, TraesCS3D02G149600	AT1G30040, AT2G34555, AT1G78440					1.12005e-22	7.65639e-20	0.748456	0.076369	9.30594	8.96959	8.77799	21.3295	19.7443	16.7537
TRITD3Av1G086560	Plant peroxidase	TraesCS3A02G180000, TraesCS3B02G209700, TraesCS3D02G184900						5.47166e-21	3.35525e-18	0.937538	0.0997412	4.0753	4.07012	3.63868	10.1476	9.75212	10.3999
TRITD1Av1G212940	Photosystem I PsaH, reaction centre subunit VI	TraesCS1A02G392000, TraesCS1B02G420100, TraesCS1D02G400100						7.80456e-21	4.71644e-18	0.714469	0.0763137	58.3696	58.4865	49.8532	107.547	124.839	110.645
TRITD3Bv1G266850		TraesCS3B02G557000, TraesCS3A02G495200, TraesCS3D02G502300						1.1086e-20	6.60379e-18	0.69637	0.0746768	73.172	75.6687	60.1803	146.189	132.835	141.175
TRITD1Av1G041760	Leucine-rich repeat domain superfamily	TraesCS1A02G101700, TraesCS1D02G093300, TraesCS1B02G112200						5.94295e-20	3.34877e-17	0.704259	0.0770072	5.63064	4.58036	4.91583	10.8148	10.2158	9.66125
TRITD5Av1G254510	Pterin 4 alpha carbinolamine dehydratase	TraesCS5A02G545700, TraesCS4B02G379500, TraesCSU02G129700						9.93198e-20	5.1768e-17	0.645556	0.0710206	19.9863	23.7017	19.9723	40.2883	39.5716	41.9708
TRITD3Bv1G044340	Alpha crystallin/Hsp20 domain	TraesCS3B02G131100, TraesCS3D02G115400						4.06353e-19	2.06636e-16	2.5815	0.288913	0.856494	0.896577	0.368536	7.71333	10.6282	9.57161
TRITD6Av1G193530	Alpha crystallin/Hsp20 domain	TraesCS6A02G316200, TraesCS6D02G295500, TraesCS6B02G346700	AT5G51440, AT4G25200					4.8542e-19	2.40965e-16	1.61775	0.181453	1.94345	1.52665	1.18761	7.58948	7.29719	8.73026
TRITD0Uv1G101850	Alpha crystallin/Hsp20 domain	TraesCSU02G175200, TraesCS5B02G245700						5.98252e-19	2.93481e-16	2.22956	0.250728	1.43361	0.611169	1.05755	8.03083	9.87703	10.419
TRITD6Bv1G073300	Chlorophyll A-B binding protein, plant	TraesCS6B02G191500, TraesCS6D02G152700, TraesCS6A02G159800	AT1G61520					7.0629e-19	3.42452e-16	0.595663	0.0671253	69.8285	78.7951	63.7299	124.434	132.792	128.934
TRITD2Av1G261030	Plant peroxidase	TraesCS2A02G467000, TraesCS2B02G489800, TraesCS2D02G467000	AT5G42180					7.4193e-19	3.55598e-16	0.69215	0.0780466	9.67592	9.59254	10.7521	21.009	20.862	18.5138
TRITD6Bv1G134260		TraesCS6D02G209600, TraesCS6A02G224800, TraesCS6B02G256600	AT3G04500					1.05512e-18	4.99958e-16	0.734248	0.0831622	19.1177	16.756	18.116	38.2084	38.7572	36.3284
TRITD5Bv1G233210	Expansin/pollen allergen, DPBB domain	TraesCS5B02G494400, TraesCS5D02G494800, TraesCS5A02G481200	AT2G28950, AT3G55500, AT2G39700					1.98516e-18	9.19748e-16	0.607711	0.0693883	17.3845	18.9301	15.2758	32.1615	30.7638	32.0512
TRITD3Bv1G163380	GDSL lipase/esterase	TraesCS3A02G273000, TraesCS3D02G272400, TraesCS3B02G306600	AT1G29670, AT4G18970, AT5G45670, AT1G29660					2.38496e-18	1.08096e-15	0.722678	0.0827107	27.1904	32.2534	25.1968	61.5539	55.4883	57.5581
TRITD6Bv1G228570	Isoprenoid synthase domain superfamily	TraesCS7B02G482000, TraesCS7D02G553300, TraesCS7A02G557300	AT5G17230					2.60708e-18	1.14431e-15	0.703652	0.080626	9.77113	9.65863	8.54502	19.0791	18.2682	19.476
TRITD4Av1G199950	RNA recognition motif domain	TraesCS4A02G289300, TraesCS4D02G022700, TraesCS4B02G025600						1.0667e-17	4.31836e-15	0.589065	0.0687637	17.353	19.6767	17.2808	31.4401	32.0507	34.9238
TRITD4Av1G168210	Alpha crystallin/Hsp20 domain	TraesCS4A02G226700, TraesCS4B02G089800, TraesCS4D02G086200						2.89863e-17	1.11914e-14	1.58185	0.187189	1.18599	0.749103	1.07606	4.17029	5.54763	5.13185
TRITD4Bv1G120830	Heat shock protein 70 family	TraesCS4B02G205700, TraesCS4D02G206600, TraesCS4A02G098600						4.93958e-17	1.83902e-14	0.671429	0.0800452	5.22375	4.17504	4.92361	8.78046	9.10272	10.2565
TRITD4Bv1G165680	Heat shock factor (HSF)-type, DNA-binding	TraesCS4B02G278100, TraesCS4D02G276500, TraesCS4A02G027700	AT3G22830, AT3G51910, AT3G63350	HSF	AT3G22830.1	1e-96	heat shock transcription factor A6B	7.44778e-17	2.7483e-14	0.861075	0.10325	4.06474	4.64929	3.53973	8.90919	10.4835	9.72
TRITD2Av1G015090	Ribulose bisphosphate carboxylase small chain, domain	TraesCS2D02G065200, TraesCS2B02G079200, TraesCS2A02G066800	AT5G38420, AT1G67090, AT5G38410, AT5G38430					7.7666e-17	2.8408e-14	0.69066	0.0828652	118.758	141.482	108.536	241.521	244.436	249.838
TRITD6Av1G224340	Virus X resistance protein-like, coiled-coil domain	TraesCS6A02G411800, TraesCS6D02G394500, TraesCS6B02G458600, TraesCS6B02G458100, TraesCS6B02G458300						1.1501e-16	4.06413e-14	0.801169	0.0966642	2.37614	1.8677	2.20581	4.59505	5.09893	4.71989
TRITD2Bv1G019880	Ribulose bisphosphate carboxylase small chain, domain	TraesCS2B02G078900, TraesCS2A02G066700, TraesCS2D02G065100	AT5G38420, AT1G67090, AT5G38410, AT5G38430					4.32077e-16	1.39665e-13	0.795184	0.097818	12.1679	12.0578	10.3887	25.5563	23.7164	27.9579
TRITD1Bv1G032240	Glycoside hydrolase family 9	TraesCS1B02G090700, TraesCS1D02G074800	AT2G44560, AT2G44570, AT2G44540, AT2G44550					9.95795e-16	3.05314e-13	0.765442	0.095354	13.1828	11.304	10.953	21.8693	28.3576	26.6356
TRITD6Av1G025210		TraesCS6A02G093300, TraesCS6B02G122200, TraesCS6D02G089000						1.00314e-15	3.05322e-13	0.637847	0.0794679	8.80099	7.66946	8.4869	17.1484	16.6902	13.7779
TRITD5Bv1G201760	Cyclic nucleotide-binding domain	TraesCS5B02G400100, TraesCS5D02G404600, TraesCS5A02G395300	AT5G15410					1.15542e-15	3.49122e-13	0.627504	0.0783488	8.90335	7.91828	8.28262	17.1907	15.3541	14.7949
TRITD6Bv1G227030	Sucrose synthase	TraesCS6B02G466600, TraesCS4A02G492600, TraesCSU02G082000, TraesCS6D02G403800	AT5G37180, AT1G73370					2.07641e-15	6.09733e-13	0.726107	0.0914873	2.8273	2.94177	2.42921	5.79813	5.94252	5.28028
TRITD4Bv1G040430	Alcohol dehydrogenase, zinc-type, conserved site	TraesCS4B02G106500, TraesCS4D02G103300, TraesCS4A02G202300	AT1G77120					2.3375e-15	6.81601e-13	1.53432	0.193679	0.662114	0.737915	0.699682	2.51055	3.29179	4.45195
TRITD2Av1G234240		TraesCS2A02G396100, TraesCS2D02G393800, TraesCS2B02G414400						2.58624e-15	7.48895e-13	1.36156	0.172144	3.09499	3.80456	2.85161	12.4338	13.2837	12.8107
TRITD6Av1G025440	Cyclin-dependent protein kinase inhibitor SMR	TraesCS6A02G094700, TraesCS6D02G088500, TraesCS6B02G122900						5.12363e-15	1.40556e-12	0.717867	0.0917537	15.4207	17.8197	16.4408	30.7564	37.0369	35.004
TRITD1Av1G104110	Dim1 family	TraesCS1A02G161900, TraesCS1D02G158700, TraesCS1B02G178500	AT5G08290					9.39516e-15	2.52748e-12	0.644351	0.0831723	84.8445	93.4585	79.5587	151.406	158.175	183.796
TRITD7Av1G004300								1.06273e-14	2.84061e-12	0.914566	0.118291	6.19737	7.58278	9.30702	19.2498	19.6314	18.5051
TRITD7Av1G264870	Signal transduction response regulator, receiver domain	TraesCS7A02G510300, TraesCS7B02G420900, TraesCS7D02G499600	AT3G62670	ARR-B	AT2G25180.1	2e-80	response regulator 12	1.19166e-14	3.14491e-12	0.903923	0.117135	2.00842	1.96791	1.6596	4.34583	4.9269	4.7359
TRITD6Bv1G139520	Autophagy-related protein 13, N-terminal	TraesCS6B02G285600, TraesCS6D02G221200, TraesCS6A02G238900						1.32235e-14	3.46787e-12	0.597366	0.0775433	16.9489	16.6956	16.995	33.0912	31.0192	28.6163
TRITD3Bv1G202470	Heat shock protein 70 family	TraesCS3B02G390700, TraesCS3D02G351900, TraesCS3D02G352400	AT3G12580					2.96487e-14	7.35887e-12	1.10348	0.145198	15.4015	11.4245	15.1924	46.4563	33.9453	47.2535
TRITD5Bv1G008040	RmlC-like cupin domain superfamily	TraesCS5B02G023100, TraesCS5A02G025300, TraesCS5D02G031700						3.94499e-14	9.61977e-12	1.17449	0.155299	1.33255	1.14589	1.7634	4.14864	4.56479	5.03449
TRITD5Av1G234850	Proton-dependent oligopeptide transporter family	TraesCS5A02G485000, TraesCS5D02G498500, TraesCS5B02G498400	AT2G38100					4.89134e-14	1.15231e-11	0.846064	0.112288	1.80362	2.50875	1.85673	5.06994	4.61443	4.65501
TRITD4Bv1G136930	Alpha crystallin/Hsp20 domain	TraesCS4B02G225400, TraesCS4D02G226000, TraesCS4A02G068300	AT4G27670					8.78783e-14	2.01338e-11	3.68605	0.494245	0.0851866	0	0.0612907	2.24562	4.19335	3.5722
TRITD1Av1G162670	Transketolase, N-terminal	TraesCS1A02G255800, TraesCS1D02G255100, TraesCS1B02G266500	AT3G21500, AT4G15560					8.92547e-14	2.03374e-11	0.602766	0.0808441	3.22751	3.8621	3.35042	6.58894	6.26203	6.29091
TRITD2Bv1G160500	Sugar/inositol transporter	TraesCS2B02G338500, TraesCS2A02G340700, TraesCS2D02G318300						1.18167e-13	2.66342e-11	0.783388	0.105595	2.38833	2.35157	2.36019	6.04155	5.27409	4.46524
TRITD7Av1G253900	Peptidase S10, serine carboxypeptidase	TraesCS7A02G482300, TraesCS7D02G469300, TraesCS7B02G384500	AT2G27920					1.37102e-13	3.07358e-11	0.605764	0.0818699	7.69063	6.84289	6.79544	14.22	11.4081	13.8269
TRITD4Av1G033200	Alpha crystallin/Hsp20 domain		AT4G27670					1.50632e-13	3.28999e-11	3.17667	0.430059	0.267025	0.125285	0.564546	6.21018	8.44502	7.3991
TRITD3Bv1G143940	Zinc finger, AN1-type	TraesCS3B02G275100, TraesCS3D02G246600	AT4G12040, AT4G25380, AT4G14225, AT1G12440, AT4G22820					2.05253e-13	4.36665e-11	1.02655	0.139755	5.19918	5.78347	5.76325	13.641	17.1018	16.7724
TRITD7Av1G175880	MIR motif	TraesCS7A02G330300, TraesCS7D02G327100, TraesCS7B02G231000	AT2G25110					2.47312e-13	5.18211e-11	0.68261	0.0932482	28.4818	29.4818	22.5978	50.9831	57.2699	51.4078
TRITD1Av1G180370	Heat shock protein 70 family	TraesCS1A02G295600, TraesCS2D02G575200, TraesCS4B02G397600	AT4G37910, AT5G09590					2.71428e-13	5.63086e-11	0.84522	0.115659	5.00271	3.96053	5.43037	9.81136	12.6513	11.1499
TRITD3Bv1G162500	ClpA/B family	TraesCS3B02G308100, TraesCS3D02G273600, TraesCS3A02G274400	AT4G14670, AT4G14675, AT1G74310					2.7857e-13	5.72208e-11	0.768053	0.10515	1.53738	1.89193	1.60749	3.46644	3.46458	3.98692
TRITD5Av1G049810	Tapetum determinant 1	TraesCS5A02G090900, TraesCS5D02G103200						3.28178e-13	6.61081e-11	0.916751	0.125888	51.4874	52.0021	37.2353	104.797	120.933	125.848
TRITD4Av1G033110	Alpha crystallin/Hsp20 domain	TraesCS4A02G068300, TraesCS4D02G226000, TraesCS4B02G225400	AT4G27670					4.19823e-13	8.25743e-11	2.95709	0.40793	0.257739	1.03284	0.850262	13.169	13.0241	11.6248
TRITD4Bv1G207630	Chaperone DnaK	TraesCS4B02G397600, TraesCS2D02G575200, TraesCS1A02G295600, TraesCSU02G116400	AT4G37910, AT5G09590					8.21405e-13	1.52906e-10	0.763972	0.106737	2.98704	2.19007	2.97457	5.75052	6.2589	5.46015
TRITD2Av1G191220	Alpha crystallin/Hsp20 domain	TraesCS2A02G312900, TraesCS2D02G311400, TraesCS4B02G014800	AT1G76770					9.47195e-13	1.73229e-10	3.39636	0.475816	0.230105	0.04932	0.0653824	3.11481	5.11419	3.10928
TRITD4Av1G041810	Alpha crystallin/Hsp20 domain	TraesCS4A02G092900, TraesCS4D02G212200, TraesCS4B02G211600						1.91511e-12	3.27279e-10	0.665812	0.0945685	24.7566	28.0682	24.01	45.8895	47.0199	58.2394
TRITD7Av1G069250	Alpha crystallin/Hsp20 domain	TraesCS7A02G202200, TraesCS7B02G109100, TraesCS7D02G205400	AT5G37670					1.95619e-12	3.32936e-10	0.755004	0.107282	10.5677	10.6313	10.7785	20.4522	21.7448	26.9562
TRITD7Bv1G193200								1.96585e-12	3.33219e-10	0.672585	0.0955799	20.513	16.9199	23.1234	40.8636	41.0062	36.9266
TRITD4Av1G156820	Alcohol dehydrogenase, zinc-type, conserved site	TraesCS4A02G202200, TraesCS4D02G103100, TraesCS4B02G106400						2.8422e-12	4.61145e-10	0.864631	0.123778	3.08043	2.90621	2.83107	5.53346	7.63915	8.24421
TRITD7Bv1G021650	RNA recognition motif domain	TraesCS7A02G152800, TraesCS7B02G056600, TraesCSU02G104300	AT4G31580, AT2G24590					4.18247e-12	6.45928e-10	0.591743	0.0853778	23.6581	23.712	19.7182	36.3158	44.0443	41.6361
TRITD1Bv1G154320	NmrA-like domain	TraesCS1B02G279100, TraesCS1D02G268500, TraesCS1A02G268400	AT4G39230, AT1G19540, AT1G75290, AT1G75280, AT1G75300					5.86289e-12	8.79391e-10	0.702858	0.102116	9.12447	11.9054	8.80974	21.1306	19.6919	19.3196
TRITD6Av1G195790		TraesCS6A02G323000, TraesCS6D02G302700, TraesCS6B02G353500						1.08431e-11	1.56594e-09	1.10294	0.16232	7.84706	6.16082	6.0196	20.0235	21.5112	19.3084
TRITD2Av1G278690	Shikimate kinase/Threonine synthase-like 1	TraesCS2A02G523400, TraesCS2B02G553300, TraesCS2D02G525500	AT2G21940, AT4G39540					1.15539e-11	1.65559e-09	0.88643	0.130632	3.70144	2.35135	3.22242	7.3539	7.38493	7.6001
TRITD2Av1G179040	Phosphatidylethanolamine-binding, conserved site	TraesCSU02G202000, TraesCS2D02G292000, TraesCS2B02G310700	AT5G03840					1.20021e-11	1.70806e-09	0.983608	0.145071	3.84404	4.82424	4.35069	12.537	11.8851	10.7309
TRITD6Av1G014080		TraesCS6A02G061000, TraesCS6D02G063600, TraesCS6B02G081400						1.33842e-11	1.88546e-09	0.614319	0.0908161	5.24543	5.12496	4.73291	10.0276	9.09823	8.9903
TRITD6Bv1G039070	Cyclin-dependent protein kinase inhibitor SMR	TraesCS6B02G122900, TraesCS6D02G088500, TraesCS6A02G094700						1.50257e-11	2.08848e-09	0.827675	0.122661	9.93006	6.823	6.92816	16.9722	18.218	18.7296
TRITD1Bv1G143950								2.37443e-11	3.17336e-09	0.761278	0.113948	18.3393	16.7811	16.6149	33.83	32.8829	46.0841
TRITD4Bv1G107070	Ribosomal protein L10e	TraesCS4B02G171600, TraesCS4D02G173700						3.27109e-11	4.26244e-09	1.01901	0.153609	1.85331	2.51281	2.60551	6.07096	6.72329	6.57723
TRITD0Uv1G040750	Inositol polyphosphate-related phosphatase	TraesCS5A02G202800, TraesCS5B02G201300, TraesCS5D02G209200	AT2G01900					3.82441e-11	4.87676e-09	0.832513	0.125934	2.45553	2.71577	2.74541	6.31661	5.62051	6.42121
TRITD1Bv1G125400	CRAL-TRIO lipid binding domain	TraesCS1B02G213900, TraesCS1D02G202700, TraesCS1A02G198900	AT3G51670					4.11715e-11	5.18662e-09	0.753006	0.114095	2.23532	2.81166	2.09352	5.02231	5.35825	4.80438
TRITD2Bv1G187220	Major intrinsic protein	TraesCS2B02G396800, TraesCS2A02G379900, TraesCS2D02G376100						7.05246e-11	8.52386e-09	0.786122	0.120579	3.9223	5.50081	5.42569	10.1192	10.8526	11.5746
TRITD6Bv1G199700	Alpha crystallin/Hsp20 domain	TraesCS6B02G374100, TraesCS6D02G322300	AT1G54050					7.13655e-11	8.57579e-09	0.62714	0.0962202	10.8927	11.8146	12.1203	20.4686	22.1108	23.1309
TRITD2Av1G223160	Sulfotransferase domain	TraesCS2A02G375800, TraesCS2D02G372000, TraesCS2B02G392700	AT1G18590, AT1G74100, AT1G74090					8.16493e-11	9.69975e-09	0.997338	0.153495	1.86858	1.30226	1.8347	4.61286	4.40782	4.54596
TRITD3Bv1G029360	Protein kinase domain	TraesCS3B02G103500						9.78014e-11	1.13597e-08	0.843932	0.130432	1.85865	1.43977	1.82988	3.96311	3.82958	4.18292
TRITD1Bv1G159670	Ankyrin repeat	TraesCS1B02G289100, TraesCS1A02G280200, TraesCS1D02G279300						1.13573e-10	1.29747e-08	0.676502	0.104922	7.71003	7.5757	6.44556	14.7083	15.9755	12.437
TRITD5Bv1G149720	Leucine-rich repeat	TraesCS5B02G265900, TraesCS5A02G266200						1.16285e-10	1.32122e-08	1.48885	0.231041	0.517943	0.445618	0.331852	1.72301	2.30887	1.85993
TRITD1Bv1G105410	Vps52	TraesCS1B02G179200, TraesCS1D02G159400, TraesCS1A02G163100	AT1G71300, AT1G71270					1.48974e-10	1.66988e-08	0.659724	0.102978	5.23433	5.65066	5.60324	10.9042	9.96187	11.2871
TRITD7Bv1G146610	Cro/C1-type helix-turn-helix domain	TraesCS7B02G259000, TraesCS7D02G353800, TraesCS7A02G369500	AT3G24500					2.05583e-10	2.23823e-08	0.914603	0.143871	33.0116	36.8681	23.4091	72.842	81.9429	75.934
TRITD5Av1G150370	Patatin-like phospholipase domain	TraesCS5A02G243200, TraesCS5D02G249800, TraesCS5B02G241100	AT2G26560					2.15684e-10	2.32995e-08	0.858119	0.135142	1.88629	1.56515	1.48149	4.08844	4.36179	3.31999
TRITD4Bv1G121900	Myc-type, basic helix-loop-helix (bHLH) domain	TraesCS4B02G203700, TraesCS4A02G100700, TraesCS4D02G204700		bHLH	AT1G27660.1	1e-22	bHLH family protein	2.54992e-10	2.73333e-08	0.747192	0.118153	3.41274	4.48145	4.05941	7.55222	10.0226	7.91743
TRITD4Bv1G127800	Nucleotide exchange factor Fes1	TraesCS4B02G208900, TraesCS4A02G095500, TraesCS4D02G209700	AT3G53800, AT3G09350, AT5G02150					2.68089e-10	2.85173e-08	0.744496	0.117871	4.11417	3.2941	3.04569	7.82276	6.83127	7.37804
TRITD6Bv1G035020	Photosystem II 5kDa protein, chloroplastic	TraesCS6B02G115900, TraesCSU02G077300, TraesCS6A02G086300						2.69016e-10	2.85431e-08	0.670091	0.1061	64.8573	67.058	59.7256	118.107	152.684	109.945
TRITD5Bv1G203270	DnaJ domain	TraesCS5B02G404700, TraesCS5A02G399900, TraesCS5D02G409800						2.74691e-10	2.90713e-08	0.86623	0.137226	1.30152	1.34341	1.58907	3.47505	3.6637	3.02401
TRITD7Bv1G155430		TraesCS7B02G276200, TraesCS7D02G371000, TraesCS7A02G351900						3.38255e-10	3.51734e-08	0.651524	0.103743	39.3396	42.1604	45.7171	98.6135	71.6506	77.6482
TRITD3Av1G045370	Zinc finger, CCCH-type	TraesCS3A02G128400, TraesCS3D02G129300		C3H	AT1G66810.1	4e-10	C3H family protein	3.64038e-10	3.72965e-08	0.853676	0.13618	3.13786	3.8363	2.4556	7.28384	7.5919	7.15246
TRITD2Bv1G158360	Lipoxygenase	TraesCS2B02G333600, TraesCS2D02G313400, TraesCS2A02G315100	AT1G17420, AT1G72520					3.67744e-10	3.74919e-08	0.611363	0.0975505	2.81225	2.55973	2.5862	4.72167	5.63265	4.46895
TRITD3Bv1G107390	Phosphofructokinase domain	TraesCS2A02G331700, TraesCS2D02G331200, TraesCS2B02G350500	AT5G47810					4.6552e-10	4.62173e-08	0.802561	0.128816	21.0708	20.4915	24.6914	53.0385	48.117	47.5619
TRITD4Av1G008900	Heat shock factor (HSF)-type, DNA-binding	TraesCS4A02G027700, TraesCS4D02G276500, TraesCS4B02G278100	AT3G22830, AT3G51910, AT3G63350	HSF	AT3G22830.1	9e-97	heat shock transcription factor A6B	5.04491e-10	4.97311e-08	0.68405	0.110017	3.65388	4.02432	3.22315	6.61418	7.23792	7.88949
TRITD5Av1G184610	Phosphatidylinositol-specific phospholipase C, X domain	TraesCS5A02G327600, TraesCS5B02G327500, TraesCS5D02G333500	AT4G34920, AT4G38690, AT4G34930					5.92694e-10	5.73414e-08	0.779676	0.125909	3.18485	3.52748	2.35495	6.65937	6.26194	6.753
TRITD6Av1G157520	Bifunctional inhibitor/plant lipid transfer protein/seed storage helical domain	TraesCS6A02G247600, TraesCS6B02G277100, TraesCS6D02G229700						1.11047e-09	1.00132e-07	0.777625	0.127633	17.5482	18.3524	23.0452	52.1477	38.3675	39.1835
TRITD5Bv1G234240	Proton-dependent oligopeptide transporter family	TraesCS5B02G498400, TraesCS5A02G485000, TraesCS5D02G498500	AT2G38100					1.28856e-09	1.14077e-07	0.870774	0.143483	1.59917	2.12894	1.34834	4.03213	4.34526	3.66503
TRITD6Av1G043010	Kelch repeat type 1	TraesCS6A02G129100, TraesCS6B02G157400, TraesCS6D02G118600	AT4G03030					1.48843e-09	1.30388e-07	0.65619	0.10854	3.24205	3.48462	3.62325	5.96386	7.832	6.42539
TRITD6Av1G056270	AMP-dependent synthetase/ligase	TraesCS6A02G151700, TraesCS6B02G179900, TraesCS6D02G141700	AT1G51680, AT3G21240					1.70068e-09	1.46822e-07	0.599635	0.0995396	27.1908	29.3432	24.1026	42.709	49.2595	56.2108
TRITD7Av1G204350	CRAL-TRIO lipid binding domain	TraesCS7A02G378400, TraesCS7D02G375200, TraesCS7B02G280200	AT1G55840, AT5G47730					1.74171e-09	1.49744e-07	0.902918	0.149981	4.30752	3.63171	3.35203	7.96875	12.1469	8.37475
TRITD3Av1G056250		TraesCS3A02G142600, TraesCS6D02G012500, TraesCSU02G039000						1.88386e-09	1.60312e-07	1.11858	0.186196	1.36147	1.30287	1.36946	3.88641	3.51932	5.38059
TRITD5Av1G051820	Cytochrome b245, heavy chain	TraesCS5A02G093600, TraesCS5D02G105900, TraesCS5B02G099700	AT1G09090					1.90181e-09	1.61182e-07	0.986942	0.164327	0.533319	0.517064	0.540882	1.397	1.61871	1.32868
TRITD3Bv1G087110	Rapid ALkalinization Factor	TraesCS3B02G205700, TraesCS3A02G176000, TraesCS3D02G181700						1.94228e-09	1.63615e-07	0.748258	0.124656	8.88868	9.36364	8.65042	19.2555	21.4525	16.945
TRITD6Av1G044680	Quinone oxidoreductase/zeta-crystallin, conserved site	TraesCS6A02G133100, TraesCS6B02G161600, TraesCS6D02G122800	AT1G23740					1.98541e-09	1.6691e-07	0.6713	0.111902	3.9215	4.29719	3.80896	8.72359	8.82366	6.38466
TRITD5Bv1G047670	EF-hand domain	TraesCS5B02G099700, TraesCS5D02G105900, TraesCS5A02G093600	AT1G09090					2.43519e-09	2.00677e-07	0.904723	0.151653	0.637807	0.745473	0.560646	1.59927	1.76481	1.47382
TRITD4Bv1G049640	EGF-like calcium-binding domain	TraesCS4B02G121300, TraesCS4A02G193900, TraesCS4D02G119400	AT2G30290, AT3G52850					2.54997e-09	2.08079e-07	0.615479	0.103299	2.3359	1.96047	2.2569	3.5454	4.28342	4.40615
TRITD7Av1G265100	SANT/Myb domain	TraesCS7A02G511100, TraesCSU02G105200, TraesCS7D02G500600, TraesCS7B02G422100	AT3G62670	ARR-B	AT2G25180.1	3e-77	response regulator 12	2.58016e-09	2.10132e-07	1.02552	0.172174	0.770289	0.56049	0.50009	1.91835	1.41436	1.80721
TRITD7Av1G264670	Aldehyde oxidase/xanthine dehydrogenase, a/b hammerhead	TraesCS7A02G509200, TraesCS7B02G417900, TraesCS7D02G498100	AT1G04580, AT5G20960, AT1G02590, AT3G43600, AT2G27150					2.99506e-09	2.38792e-07	0.593316	0.100022	2.53335	2.20622	2.71923	4.03001	4.98588	4.57315
TRITD7Bv1G216470	SANT/Myb domain	TraesCS7B02G422000	AT3G62670	ARR-B	AT2G25180.1	3e-77	response regulator 12	3.1435e-09	2.49671e-07	1.92454	0.324876	0.116275	0.231129	0.28735	2.105	1.19589	1.14186
TRITD0Uv1G039410	Protein of unknown function DUF4228, plant	TraesCS5A02G204400, TraesCS5D02G211700, TraesCS5B02G203800						3.80482e-09	2.97104e-07	0.675111	0.114572	5.33472	5.10836	5.04267	9.35365	11.789	9.68571
TRITD3Av1G047960	Phloem protein 2-like	TraesCS3A02G310200, TraesCS3D02G136100, TraesCS3B02G153400	AT1G65390, AT1G33920, AT5G45090, AT4G19840, AT4G19850					3.84681e-09	2.99821e-07	0.679477	0.115348	4.93099	4.64116	3.86367	8.62576	8.10386	9.96238
TRITD2Av1G081720	Germin	TraesCS2A02G211800, TraesCS4D02G032500						4.20518e-09	3.2233e-07	0.581865	0.0990255	7.77589	7.77312	8.91969	14.0967	14.2542	15.7094
TRITD2Av1G227030	Glycoside hydrolase family 1	TraesCS2A02G384300, TraesCS2B02G401500, TraesCS2D02G381000						4.70035e-09	3.56355e-07	0.734343	0.125369	12.7614	9.27582	8.71569	19.3955	22.095	22.1917
TRITD2Bv1G215760	Tetratricopeptide-like helical domain superfamily	TraesCS2B02G462900						5.69249e-09	4.25386e-07	0.815412	0.139972	0.392397	0.279402	0.345488	0.79268	0.850991	0.666971
TRITD5Av1G010030	RmlC-like cupin domain superfamily	TraesCS5A02G025300, TraesCS5D02G031700, TraesCS5B02G023100, TraesCS5B02G023400						6.13265e-09	4.55827e-07	1.34462	0.231309	0.648528	0.557122	0.541204	1.84924	2.65207	2.481
TRITD1Bv1G125830	Cyanobacterial aminoacyl-tRNA synthetase, CAAD domain	TraesCS1B02G214700, TraesCS1A02G200000, TraesCS1D02G203500						6.16989e-09	4.57779e-07	0.810152	0.139391	5.88678	4.57131	6.48703	12.6699	13.4694	11.9963
TRITD2Av1G191250	Domain of unknown function DUF861, cupin-3	TraesCS2A02G313000, TraesCS2B02G330100, TraesCS2D02G311500	AT4G10300					6.38821e-09	4.72297e-07	0.632996	0.10902	27.0474	36.8913	27.4097	56.5123	59.5228	55.4863
TRITD5Av1G106600	Major facilitator superfamily	TraesCS5A02G140000, TraesCS5D02G153600, TraesCS5B02G137400	AT3G43790, AT5G13740, AT5G13750					6.50835e-09	4.80328e-07	0.645325	0.111203	32.7859	33.6526	27.0255	53.2979	70.6857	55.7915
TRITD5Bv1G135200	Chlorophyll A-B binding protein, plant	TraesCS5B02G227900, TraesCS5A02G229300, TraesCS5D02G238300	AT3G47470					7.36271e-09	5.38614e-07	0.683854	0.118264	115.958	144.787	98.085	228.015	234.594	243.836
TRITD2Bv1G069200	NADH-ubiquinone reductase complex 1 MLRQ subunit	TraesCS2B02G201000, TraesCS2D02G182000, TraesCS2A02G174600						7.56074e-09	5.49247e-07	1.13433	0.19632	7.16812	4.32074	5.18324	14.0764	18.1866	20.0286
TRITD2Bv1G122000	Photosystem I PsaG/PsaK protein	TraesCS2B02G272300, TraesCS2A02G252600, TraesCS2D02G253200						9.71632e-09	6.86502e-07	0.639169	0.111439	98.7687	112.481	80.4451	174.251	201.749	176.586
TRITD5Bv1G165770	NB-ARC	TraesCS5B02G304900, TraesCS5A02G304400, TraesCS5D02G311300						9.81446e-09	6.90123e-07	0.846346	0.147604	0.629568	0.748688	0.754426	1.49842	1.83901	1.69189
TRITD1Av1G130880	Cyanobacterial aminoacyl-tRNA synthetase, CAAD domain	TraesCS1A02G200000, TraesCS1D02G203500, TraesCS1B02G214700						1.00468e-08	7.02908e-07	0.630742	0.110078	8.61345	11.3662	8.28266	18.2772	18.4498	16.3586
TRITD4Bv1G040420	Alcohol dehydrogenase, zinc-type, conserved site	TraesCS4B02G106400, TraesCS4D02G103100, TraesCS4A02G202200	AT1G77120					1.16126e-08	8.01692e-07	1.04073	0.182415	1.54228	1.94136	1.45475	4.68623	4.27329	5.16212
TRITD5Av1G237000	FAS1 domain	TraesCS5A02G490900, TraesCS4B02G321200, TraesCS4D02G317800	AT3G60900, AT2G45470					1.1795e-08	8.10263e-07	0.664646	0.11655	3.41918	2.54188	2.92513	5.1945	6.37255	5.7783
TRITD4Av1G043180	Armadillo-like helical	TraesCS4A02G095500, TraesCS4B02G208900, TraesCS4D02G209700	AT3G53800, AT3G09350, AT5G02150					1.24338e-08	8.42589e-07	0.836548	0.146926	1.68761	1.37945	1.71034	3.46915	3.86748	3.76883
TRITD1Av1G031490	Phosphoglycerate/bisphosphoglycerate mutase, active site	TraesCS1A02G084500, TraesCS1D02G085900, TraesCS1B02G101800	AT1G08940, AT3G05170					1.87473e-08	1.21198e-06	0.672915	0.119668	3.05513	2.06531	2.59647	5.44296	4.90167	4.73944
TRITD6Av1G022570		TraesCS6A02G086300, TraesCSU02G077300, TraesCS6B02G115900						2.10261e-08	1.34265e-06	0.641642	0.114511	82.8612	99.3319	69.8404	153.027	173.306	151.84
TRITD6Bv1G212980	Thioredoxin domain	TraesCS6B02G409800, TraesCS6D02G356100, TraesCS6A02G372100	AT1G76080					2.1527e-08	1.37253e-06	0.681722	0.121752	8.12498	9.6571	6.48461	15.1206	15.873	16.7266
TRITD4Bv1G047020	TB2/DP1/HVA22-related protein	TraesCS4B02G116600, TraesCS4A02G198800, TraesCS4D02G114200	AT2G36020					2.17048e-08	1.38175e-06	0.598391	0.106897	12.3462	12.8906	9.51249	20.282	23.0564	19.913
TRITD1Bv1G191450	Phytocyanin domain	TraesCS1B02G362600, TraesCS1A02G348000, TraesCS1D02G350900						2.66172e-08	1.65654e-06	0.658059	0.118306	65.472	84.5549	63.6366	139.176	154.554	120.116
TRITD6Bv1G149000	Putative S-adenosyl-L-methionine-dependent methyltransferase	TraesCS6B02G269400, TraesCS6A02G256000, TraesCS6D02G237200	AT4G00750, AT2G45750					3.34004e-08	2.03022e-06	0.583734	0.105699	2.90624	3.29151	2.51423	4.74454	5.85117	5.10966
TRITD3Av1G002350								3.57941e-08	2.15374e-06	0.644103	0.116888	53.5428	35.0069	38.4301	80.9319	79.2779	78.8671
TRITD1Bv1G052110	NADH dehydrogenase-like complex, subunit S	TraesCS1B02G126900, TraesCS1D02G105800, TraesCS1A02G097000						3.91043e-08	2.32606e-06	0.671601	0.122224	3.65646	5.1942	4.45679	9.33008	8.84551	7.89152
TRITD1Bv1G137910	AP2/ERF domain	TraesCS1B02G243200, TraesCS1A02G231200, TraesCS1D02G230900	AT1G72360	ERF	AT3G16770.1	1e-40	ethylene-responsive element binding protein	4.65076e-08	2.70804e-06	0.667371	0.122136	6.52054	6.06987	5.87953	12.8469	13.2849	10.3631
TRITD1Bv1G140910	Glycoside hydrolase family 17	TraesCS1B02G249000, TraesCS1D02G237500, TraesCS1A02G234600	AT3G57240, AT3G57260, AT4G16260, AT3G57270					5.06501e-08	2.91714e-06	1.11661	0.20492	0.848775	0.569705	0.938996	2.5755	1.82143	2.95153
TRITD3Bv1G168520	Glycosyl transferase, family 8	TraesCS3B02G318100, TraesCS3A02G284100, TraesCS3D02G284000	AT3G58790					5.66868e-08	3.1906e-06	0.666913	0.122844	2.03179	1.7723	1.53488	3.21223	3.85258	3.38621
TRITD4Av1G201080	BTB/POZ domain	TraesCS4A02G294400, TraesCS4D02G017500, TraesCS4B02G018900	AT4G19660, AT5G45110					5.73039e-08	3.21797e-06	0.993276	0.183024	0.543054	0.691346	0.387698	1.49273	1.34916	1.49588
TRITD0Uv1G023990	Alpha crystallin/Hsp20 domain	TraesCSU02G047300, TraesCSU02G164000, TraesCS3D02G045700, TraesCS3D02G046300, TraesCS3D02G046600						5.82375e-08	3.25521e-06	1.23488	0.227664	12.9791	16.3257	23.3676	44.124	72.1466	64.8025
TRITD4Av1G045640	Heat shock protein 70 family	TraesCS4A02G098600, TraesCS4D02G206600, TraesCS4B02G205700						5.96086e-08	3.30802e-06	1.26584	0.233551	1.3087	0.796906	1.68864	3.60788	4.73676	4.74339
TRITD7Bv1G047110	B-box-type zinc finger	TraesCS7B02G113400, TraesCS7A02G206200, TraesCS7D02G209000	AT1G68520, AT1G25440, AT1G73870, AT1G49130	CO-like	AT1G25440.1	6e-83	B-box type zinc finger protein with CCT domain	5.95497e-08	3.30802e-06	0.624523	0.115222	2.13614	2.19417	2.34656	4.01885	4.38834	4.16019
TRITD5Bv1G086810		TraesCS5B02G137300, TraesCS5A02G139900, TraesCS5D02G153500	AT5G04200					6.72574e-08	3.66122e-06	0.592486	0.109753	48.6097	47.8338	37.1751	76.9092	91.6609	73.7843
TRITD1Av1G142880	Protein kinase domain	TraesCS1A02G222700, TraesCS1B02G236000, TraesCS1D02G224300	AT5G58540, AT5G07150, AT3G56050, AT2G40270					7.28529e-08	3.92483e-06	0.807171	0.149921	1.09561	1.34688	0.946822	2.29259	3.13353	2.26114
TRITD3Av1G278300		TraesCS5A02G034200						8.44254e-08	4.44491e-06	0.614872	0.11477	10.3253	10.0162	11.4949	18.3751	19.6781	21.3621
TRITD6Bv1G021770	EF-hand domain	TraesCS6B02G088900, TraesCS6A02G065900, TraesCSU02G118100						8.50823e-08	4.46822e-06	0.851648	0.159008	15.1004	13.4329	9.19392	26.6506	32.139	28.8322
TRITD6Bv1G052260	Protein kinase domain	TraesCS6B02G150200, TraesCS6D02G112000, TraesCS6A02G122000						8.58542e-08	4.50308e-06	0.593124	0.110774	1.53426	1.19563	1.27181	2.68013	2.34835	2.24585
TRITD4Bv1G208050	Pyridoxal phosphate-dependent decarboxylase	TraesCS4B02G396200, TraesCSU02G029800						9.87476e-08	5.07091e-06	1.21035	0.227125	0.286339	0.394374	0.587263	1.29904	1.41884	1.49059
TRITD1Av1G172950								1.02201e-07	5.21612e-06	0.731395	0.137409	3.61908	2.84764	3.20271	5.67785	8.16416	6.57908
TRITD3Bv1G256280		TraesCS3B02G517900, TraesCS3D02G470700, TraesCS3A02G474300						1.08402e-07	5.4657e-06	0.631627	0.118905	6.78836	7.11044	9.44137	15.8336	15.1575	12.8656
TRITD5Av1G227400	Oxygen-evolving enhancer protein 3	TraesCS5A02G461500, TraesCS5D02G474200, TraesCS5B02G471700						1.11799e-07	5.59734e-06	0.672386	0.126712	11.2616	13.1874	9.10152	19.6048	21.9219	24.1809
TRITD2Av1G160080	RNA recognition motif domain	TraesCS2A02G273400						1.24608e-07	6.193e-06	0.593083	0.112186	2.15053	1.85288	2.50226	3.92567	4.13354	3.72561
TRITD5Bv1G127660	Gamma-glutamylcyclotransferase, AIG2-like	TraesCS5B02G209700, TraesCS5D02G218000, TraesCS5A02G214000	AT5G46720, AT3G02910					1.26116e-07	6.25111e-06	0.611247	0.11567	6.51954	8.91723	7.09224	13.1584	15.3537	13.092
TRITD6Av1G214540	Thioredoxin domain	TraesCS6A02G372100, TraesCS6D02G356100, TraesCS6B02G409800	AT1G76080					1.38504e-07	6.78652e-06	0.745392	0.141515	2.70495	2.73084	2.18596	5.15745	4.68164	6.44507
TRITD7Bv1G019190	SWEET sugar transporter	TraesCS7B02G050500, TraesCS7A02G147300, TraesCS7D02G149000	AT5G23660, AT5G50800, AT5G13170, AT5G50790, AT3G48740, AT4G25010					1.55182e-07	7.43767e-06	0.877587	0.167277	5.35001	3.49497	4.67002	13.4204	9.24021	10.0355
TRITD7Bv1G183940	Protein DMP	TraesCS7B02G337100, TraesCS7D02G428000, TraesCS7A02G438100	AT3G21520, AT3G21550					1.71156e-07	8.10085e-06	0.867693	0.165964	4.08016	3.52445	3.27262	9.36379	8.59257	8.24554
TRITD0Uv1G115290	Glycoside hydrolase family 9	TraesCS1A02G072300, TraesCS1D02G074900, TraesCS1D02G075100	AT2G44560, AT2G44570, AT2G44540, AT2G44550					1.82287e-07	8.49275e-06	0.749115	0.143603	19.9058	28.0726	23.9465	41.5688	54.2002	57.344
TRITD7Av1G086030	UDP-glucuronosyl/UDP-glucosyltransferase	TraesCS7A02G234900, TraesCS7D02G234900, TraesCS7B02G133100	AT1G05530, AT1G05560, AT4G14090, AT4G15550					1.98838e-07	9.10114e-06	0.597555	0.114905	2.29703	2.8412	1.98104	3.966	4.61337	4.34183
TRITD1Bv1G146000		TraesCS1B02G261000, TraesCS1D02G250000, TraesCS1A02G250400						2.20011e-07	9.97174e-06	0.589504	0.113769	9.78855	11.2142	9.34547	16.954	22.2999	16.3011
TRITD7Bv1G018330	Signal transduction response regulator, receiver domain	TraesCS7B02G049100, TraesCS7A02G146600, TraesCS7D02G148100	AT2G47430					2.78897e-07	1.23063e-05	0.995463	0.193776	0.60096	0.373204	0.353659	1.42437	1.10066	1.04062
TRITD3Av1G049660	Phytocyanin domain	TraesCS3A02G314000, TraesCS3D02G140400, TraesCS3B02G157900						2.96061e-07	1.2954e-05	0.709313	0.138377	10.4178	13.944	15.8982	28.1953	29.2432	24.0017
TRITD0Uv1G042890	Gamma-glutamylcyclotransferase, AIG2-like	TraesCS5A02G214000, TraesCS5D02G218000, TraesCS5B02G209700	AT5G46720, AT3G02910					3.31657e-07	1.42866e-05	1.04615	0.204946	2.49885	2.0917	1.7623	5.897	6.07168	6.25115
TRITD6Av1G212420		TraesCS6A02G362200						3.59463e-07	1.53575e-05	0.729762	0.143392	26.0116	39.9578	32.4083	62.3014	75.8229	65.1306
TRITD6Bv1G055440	BURP domain	TraesCS6B02G157900, TraesCS6D02G119300, TraesCS4A02G014300	AT5G25610					3.65104e-07	1.55825e-05	0.996019	0.195824	1.90354	2.6211	1.3683	5.48618	4.72382	5.37007
TRITD7Av1G261590	SANT/Myb domain	TraesCS7A02G502300, TraesCS7D02G489600, TraesCS7B02G408700	AT3G62670	ARR-B	AT2G25180.1	3e-84	response regulator 12	4.14545e-07	1.74629e-05	0.736999	0.14559	1.12238	1.29303	1.19796	2.66918	2.45976	2.48997
TRITD6Av1G199660	Nitrite/Sulfite reductase ferredoxin-like domain	TraesCS6A02G333900, TraesCS6D02G313100, TraesCS6B02G364600	AT2G15620					4.28482e-07	1.79928e-05	0.663006	0.131137	1.53186	1.33791	1.44801	2.72268	3.20018	2.55967
TRITD1Bv1G020600	Protein kinase domain	TraesCS1B02G076800, TraesCS1D02G058900						4.54253e-07	1.89036e-05	0.708174	0.14038	2.06514	1.62724	2.25592	4.37291	3.87444	3.85973
TRITD1Bv1G212900	Glycoside hydrolase family 16	TraesCS1B02G424500, TraesCS1D02G404300, TraesCS1A02G396200						4.70267e-07	1.93385e-05	0.735526	0.145994	3.23531	2.36117	2.50682	5.36542	4.90968	6.81735
TRITD5Av1G254600	C2 domain	TraesCS5A02G546300, TraesCS4B02G380100, TraesCSU02G130300	AT2G01540, AT1G73580, AT3G17980, AT1G66360, AT1G70810, AT1G70790, AT1G48590, AT1G70800, AT1G23140, AT5G37740					4.88038e-07	2.00039e-05	0.625479	0.124326	5.87812	6.7803	7.2355	12.5668	10.5888	14.5335
TRITD6Bv1G159060	Carotenoid oxygenase	TraesCS6B02G298800, TraesCS6D02G251800, TraesCS6A02G271600	AT4G19170					5.33372e-07	2.15927e-05	0.603457	0.120357	5.93617	4.04922	4.56912	9.20558	8.06477	9.23389
TRITD1Av1G024610	Glycoside hydrolase family 9	TraesCS1A02G072100, TraesCS1D02G074700	AT2G44560, AT2G44570, AT2G44540, AT2G44550					5.43535e-07	2.19191e-05	0.58066	0.115894	10.2996	9.21287	7.36888	14.8111	18.0218	15.2225
TRITD2Bv1G214430	F-box-like domain superfamily	TraesCS2B02G458800, TraesCS2D02G435600, TraesCS2A02G438500						5.45332e-07	2.19398e-05	0.952726	0.190179	1.126	1.9457	1.10798	3.79065	3.31355	3.59332
TRITD1Av1G192120		TraesCS5A02G518800, TraesCS6B02G258200, TraesCS6B02G135700						5.4589e-07	2.19398e-05	0.61729	0.123225	4.85443	5.67817	4.5276	9.47683	9.23346	9.32835
TRITD5Bv1G068770		TraesCS6B02G258200, TraesCS7A02G024000, TraesCS5A02G518800						5.4589e-07	2.19398e-05	0.61729	0.123225	4.85443	5.67817	4.5276	9.47683	9.23346	9.32835
TRITD2Bv1G079700	Aromatic amino acid lyase	TraesCS2B02G224000, TraesCS2D02G204400, TraesCS2A02G212900, TraesCS2D02G218700, TraesCS2A02G212600, TraesCS2A02G196400	AT5G04230, AT3G53260, AT3G10340, AT2G37040					5.60894e-07	2.2467e-05	1.03789	0.207403	0.352198	0.283233	0.304632	0.709356	0.909747	1.12662
TRITD7Av1G032380	Transferase	TraesCS7A02G112700, TraesCS7B02G010400, TraesCS7D02G107900	AT1G28680					6.10642e-07	2.425e-05	0.675205	0.135371	3.19973	3.34974	2.52347	4.99865	7.15514	5.85941
TRITD3Av1G155600	ATPase, AAA-type, core	TraesCS3A02G230900, TraesCS3D02G222400, TraesCS3B02G260200	AT5G17740, AT3G29800, AT5G17730, AT5G17750, AT5G17760					6.7168e-07	2.61754e-05	0.600853	0.120911	2.53416	2.27408	2.35607	4.50351	4.65262	4.03454
TRITD0Uv1G046640	Zf-FLZ domain	TraesCS5A02G216400, TraesCS5B02G215300, TraesCS5D02G224500						7.62756e-07	2.91525e-05	0.614852	0.124346	35.3473	44.0373	52.8704	85.4791	74.6493	83.1689
TRITD7Bv1G216530	SANT/Myb domain	TraesCS7B02G422100, TraesCS7A02G511100, TraesCS7A02G511300, TraesCSU02G105200, TraesCS7D02G500600	AT3G62670	ARR-B	AT4G31920.1	1e-77	response regulator 10	7.63707e-07	2.91621e-05	1.72011	0.34789	0.0756612	0.116313	0.107852	0.846405	0.706853	0.351871
TRITD1Bv1G179130	Cyclic nucleotide-binding domain	TraesCS1B02G334100, TraesCS1D02G322000, TraesCS1A02G321700	AT5G54250					8.4031e-07	3.17384e-05	0.664366	0.134876	1.67017	2.43213	2.40009	4.58415	3.81943	4.17312
TRITD6Av1G183090	B-box-type zinc finger	TraesCS6A02G293200, TraesCS6D02G274100, TraesCS6B02G323400	AT1G68520, AT1G25440, AT1G73870, AT1G49130	CO-like	AT1G25440.1	1e-76	B-box type zinc finger protein with CCT domain	8.69907e-07	3.26787e-05	0.652184	0.132585	1.83975	1.71999	1.88699	3.33829	3.64739	3.56386
TRITD7Av1G118960		TraesCS7A02G279200, TraesCS2B02G256000						9.07428e-07	3.38141e-05	0.642102	0.130755	11.093	8.61426	13.696	21.9889	20.9718	20.0682
TRITD7Bv1G145930	Transferase		AT3G62160					9.12233e-07	3.39412e-05	0.628028	0.127916	6.64117	7.2684	6.74463	12.3323	14.7501	12.1105
TRITD2Bv1G165720	Amino acid transporter, transmembrane domain	TraesCS2B02G351100, TraesCS2D02G331800, TraesCS2A02G331100	AT5G23810					9.12469e-07	3.39412e-05	0.618629	0.126003	4.72703	6.5317	4.7313	10.3134	10.5079	8.81268
TRITD5Bv1G122760	Inositol polyphosphate-related phosphatase	TraesCS5B02G201300, TraesCS5A02G202800, TraesCS5D02G209200	AT2G01900					9.69803e-07	3.53796e-05	0.600651	0.12264	3.38344	3.58806	3.08548	6.14708	7.0781	5.33312
TRITD2Bv1G039490	Photosystem II PsbX	TraesCS2B02G130300, TraesCS2D02G112000, TraesCS2A02G111300						1.00873e-06	3.67355e-05	0.713617	0.145936	111.585	145.796	96.16	221.882	275.869	221.929
TRITD5Bv1G182790		TraesCS5B02G351200						1.01933e-06	3.70566e-05	0.725659	0.148461	3.00722	3.43319	3.26337	5.8964	6.06642	8.58767
TRITD4Bv1G004500	Tubulin	TraesCS4B02G017100, TraesCS4A02G296600, TraesCS4D02G015400						1.02806e-06	3.72441e-05	0.595493	0.121873	10.1109	10.7815	7.51963	17.6892	15.7009	17.9375
TRITD5Bv1G145910	Alpha crystallin/Hsp20 domain	TraesCS5B02G257000, TraesCS5A02G257700, TraesCS5D02G266000						1.13039e-06	4.01491e-05	1.50136	0.308447	1.2027	0.79246	2.28169	5.35353	5.71357	6.79583
TRITD5Av1G147560	Glycosyl transferase, family 31	TraesCS5A02G235300, TraesCS5D02G242400, TraesCS5B02G233700	AT1G22015, AT1G77810					1.16415e-06	4.12429e-05	0.585292	0.12039	2.68551	3.34223	3.90714	6.55156	5.79118	5.4719
TRITD3Bv1G169780	Pyridoxal phosphate phosphatase-related	TraesCS3B02G322200, TraesCS3D02G287300, TraesCS3A02G287500, TraesCS3D02G287100	AT1G73010, AT1G17710					1.17674e-06	4.16533e-05	1.20279	0.247513	0.629102	0.960369	0.473477	2.25303	2.91077	1.75689
TRITD3Av1G195430	Pyridoxal phosphate-dependent decarboxylase	TraesCS3A02G296900, TraesCS3D02G305600, TraesCS3B02G340000						1.28364e-06	4.49038e-05	1.29184	0.266784	0.248881	0.439435	0.188339	1.10914	1.02401	0.976111
TRITD3Bv1G002990		TraesCS3B02G014200						1.30859e-06	4.55473e-05	0.775036	0.160183	9.96353	13.4364	9.58669	22.1125	23.7398	25.8579
TRITD7Av1G189820	FAD linked oxidase, N-terminal	TraesCS7A02G353700, TraesCS7D02G369100	AT1G34575, AT1G26410, AT4G20800, AT1G01980, AT1G26420, AT1G11770, AT1G30700, AT1G26390, AT4G20830, AT1G26400, AT1G30730, AT2G34810, AT1G26380, AT4G20840, AT1G30720, AT1G30740, AT1G30710					1.4217e-06	4.87917e-05	0.717923	0.148887	1.02175	1.23276	0.978615	2.62005	1.90535	2.19603
TRITD7Av1G061410	Amino acid transporter, transmembrane domain	TraesCS7A02G188200, TraesCS7D02G189000, TraesCS7B02G093200						1.52578e-06	5.18941e-05	0.634349	0.131941	3.06252	4.03642	2.81056	6.77934	6.52007	5.39198
TRITD5Bv1G147150	FAS1 domain	TraesCS5B02G260100, TraesCS5A02G262000, TraesCS5D02G269300	AT2G04780					1.54076e-06	5.23131e-05	0.590089	0.122785	19.6624	21.4511	15.9096	29.0635	37.8971	36.4452
TRITD3Bv1G003250	Protein kinase domain	TraesCS3B02G015500, TraesCSU02G167900, TraesCS3D02G011400, TraesCS3A02G013400						1.62844e-06	5.49373e-05	0.710382	0.148157	1.49946	1.34705	1.43085	2.91147	2.34948	3.66681
TRITD2Av1G029940	Photosystem II PsbX	TraesCS2A02G111300, TraesCS2D02G112000, TraesCS2B02G130300						1.67439e-06	5.63223e-05	0.657205	0.137226	115.498	142.151	94.1829	211.928	253.723	210.824
TRITD5Bv1G092530	Chalcone isomerase	TraesCS5B02G145800, TraesCS5D02G145400, TraesCS5A02G146900						1.68901e-06	5.67512e-05	0.595374	0.124361	23.1083	25.2586	17.0507	38.1109	38.539	41.2141
TRITD6Av1G002820	S-phase kinase-associated protein 1-like	TraesCS6A02G016900, TraesCS6B02G024700, TraesCS7D02G439100						1.86528e-06	6.18606e-05	0.630346	0.132217	5.92839	8.48672	6.1677	13.5819	11.4012	13.6504
TRITD1Av1G184510	Chlorophyll A-B binding protein, plant	TraesCS1A02G306600, TraesCS1B02G317500, TraesCS6B02G122500, TraesCS1D02G306200	AT1G29910, AT2G34420, AT1G29930, AT2G34430, AT1G29920					1.86102e-06	6.18606e-05	0.599762	0.12579	46.6835	55.1401	36.8296	77.6401	86.8149	86.5931
TRITD7Av1G037550	Protein of unknown function UPF0301	TraesCS7A02G126700, TraesCS7D02G124600, TraesCS7B02G026100	AT3G29240					1.9504e-06	6.41385e-05	0.695283	0.146114	2.02545	2.26154	2.07012	3.79557	5.53967	3.74263
TRITD3Bv1G134490	Pectinesterase, catalytic	TraesCS3B02G258100, TraesCS3D02G224400, TraesCS3A02G226400	AT2G21610					2.01832e-06	6.58529e-05	0.647989	0.136373	28.2097	38.3396	37.2217	76.0383	68.2238	55.1605
TRITD5Av1G195790	Wall-associated receptor kinase, galacturonan-binding domain	TraesCS5B02G368200, TraesCS5D02G375200						2.07658e-06	6.7437e-05	0.838543	0.176691	0.832064	0.619758	0.810058	1.68068	1.84076	1.72985
TRITD7Av1G196870	Glycoside hydrolase family 16	TraesCS7A02G363000, TraesCS7D02G360100, TraesCS7B02G265000	AT2G36870					2.09443e-06	6.78055e-05	0.824007	0.173691	2.06985	2.30009	1.41988	4.99538	4.28282	3.90286
TRITD2Av1G013590	Oxoglutarate/iron-dependent dioxygenase	TraesCS2A02G060500, TraesCS2B02G073900						2.13214e-06	6.89195e-05	0.679819	0.143407	3.2638	3.1152	2.33439	5.21201	6.5555	5.50616
TRITD2Av1G191260	Pectinesterase inhibitor domain	TraesCS2A02G313100, TraesCS2D02G311600, TraesCS2B02G330200						2.16235e-06	6.96324e-05	0.644236	0.135983	12.1236	11.6893	12.3541	17.9337	28.4977	24.1921
TRITD7Av1G233710	Peptidase M20	TraesCS7A02G435700, TraesCS7B02G335500, TraesCS7D02G426400	AT1G44350					2.16255e-06	6.96324e-05	0.626382	0.132215	3.65128	4.02628	2.90281	5.71774	7.77803	6.42378
TRITD7Bv1G232050	IRX15/IRX15L/IGXM	TraesCS7B02G485000, TraesCS7A02G560100, TraesCS7D02G549800	AT1G09610, AT4G09990, AT1G71690, AT1G33800					2.62516e-06	8.2057e-05	0.623734	0.132761	2.67644	2.95225	2.70514	4.7406	6.16693	4.87937
TRITD6Bv1G224710	NB-ARC							2.6579e-06	8.28939e-05	0.735549	0.156646	0.623748	0.421531	0.53838	1.11734	1.27135	0.933634
TRITD1Bv1G222590		TraesCS1B02G461500, TraesCS1D02G436400						2.6606e-06	8.29162e-05	0.669556	0.142598	83.5656	60.7971	55.4361	111.243	127.003	150.694
TRITD2Av1G260890	Protein of unknown function DUF716	TraesCS2A02G465800, TraesCS2D02G466300, TraesCS2B02G487900, TraesCSU02G181800, TraesCSU02G212900, TraesCSU02G010600, TraesCSU02G182600						2.69228e-06	8.36389e-05	0.662707	0.141212	2.19591	2.56688	2.51671	4.63953	5.02232	4.57474
TRITD5Av1G159570	Myc-type, basic helix-loop-helix (bHLH) domain	TraesCS5A02G264800, TraesCS5D02G272800, TraesCS5B02G264300	AT2G42280, AT1G51140	bHLH	AT2G42280.1	2e-53	bHLH family protein	2.75049e-06	8.51446e-05	0.675587	0.144091	1.77914	2.0069	2.01865	4.06096	4.62513	3.00204
TRITD6Bv1G018210	Leucine-rich repeat domain superfamily	TraesCS6D02G060400, TraesCS6A02G056900						2.80827e-06	8.65478e-05	0.816969	0.174403	0.721404	0.449074	0.7585	1.35911	1.35878	1.58896
TRITD6Bv1G227610	1,3-beta-glucan synthase subunit FKS1-like, domain-1	TraesCS6B02G468600, TraesCS6A02G419900, TraesCS6D02G405900	AT5G36870, AT1G05570, AT5G13000, AT2G31960					2.82783e-06	8.68938e-05	0.860384	0.183727	1.04444	1.36334	1.22932	3.54488	2.75696	2.47233
TRITD6Av1G144790		TraesCS6A02G226000, TraesCS6D02G209100, TraesCS6B02G255600						3.37923e-06	0.000101372	0.806461	0.17357	2.87639	4.00597	3.25789	6.80096	10.1139	6.39877
TRITD2Av1G150470	Multicopper oxidase, type 1	TraesCS2A02G264900, TraesCS2B02G277200, TraesCS2D02G259100	AT4G37160, AT5G66920, AT2G23630					3.80098e-06	0.000112009	0.671917	0.145374	1.1822	0.950322	1.48251	2.15293	2.68823	2.22625
TRITD3Bv1G147220	Protein of unknown function DUF538	TraesCS3B02G282700, TraesCS4A02G279500, TraesCS4A02G182000, TraesCS4D02G031400	AT5G19860					4.02466e-06	0.000117604	0.643418	0.139567	6.68661	8.56267	5.90451	13.0287	15.6416	11.7268
TRITD2Bv1G225460	Leucine-rich repeat domain superfamily	TraesCS2B02G496800						4.08456e-06	0.000119103	0.715756	0.155362	3.67192	2.25134	3.48623	6.42659	6.5873	5.94086
TRITD3Bv1G260330								4.09107e-06	0.00011921	0.669127	0.145251	21.6296	31.8577	22.9618	43.4271	53.4276	52.0999
TRITD6Bv1G224860	NB-ARC	TraesCS6B02G458300, TraesCS6A02G411800, TraesCS6D02G394500						4.27572e-06	0.000123726	0.595575	0.129543	0.706453	0.602393	0.875307	1.29944	1.45464	1.20796
TRITD4Bv1G013070	B-box-type zinc finger	TraesCS4B02G045700, TraesCS4A02G268500, TraesCS4D02G046200		CO-like	AT1G25440.1	6e-71	B-box type zinc finger protein with CCT domain	4.43368e-06	0.000127542	0.672203	0.146451	1.69945	2.00975	1.84362	3.86972	3.54764	3.54806
TRITD1Bv1G125890	Plant peroxidase	TraesCS1B02G214900, TraesCS1D02G203700, TraesCS1A02G200200						4.85199e-06	0.000137913	0.657451	0.143828	2.19959	2.1654	1.99979	4.29218	4.33154	3.79446
TRITD4Bv1G168280	Cytochrome P450	TraesCS4B02G284700, TraesCS4A02G019400, TraesCS4D02G283400	AT1G69500					4.93022e-06	0.000139661	0.910593	0.199353	0.534916	0.633983	0.628029	1.38538	1.84316	1.34374
TRITD5Bv1G225320	Chaperonin-like RbcX	TraesCS5B02G468800, TraesCS5D02G470300, TraesCS5A02G459200	AT5G19855					5.06339e-06	0.000142823	0.602574	0.132081	4.75848	4.77686	3.83219	8.55573	9.21328	6.92056
TRITD3Bv1G241620		TraesCS3B02G475300, TraesCS3A02G441300, TraesCS3D02G434100		Trihelix	AT2G33550.1	7e-49	Trihelix family protein	5.21629e-06	0.000146668	1.43345	0.314637	0.660449	1.18411	0.545805	3.42489	3.92863	2.60971
TRITD1Av1G092270	Proton-dependent oligopeptide transporter family	TraesCS1A02G150400, TraesCS1D02G147400, TraesCS1B02G168100						5.32161e-06	0.000149127	0.794877	0.174633	0.544126	0.581786	0.81778	1.4898	1.19426	1.64171
TRITD7Av1G007710	Glutathione S-transferase, N-terminal	TraesCS7A02G034300						5.98471e-06	0.000164611	0.852543	0.188327	1.96943	1.38895	1.44343	3.70359	2.99525	4.82551
TRITD4Av1G259790	Transcription factor GRAS	TraesCS4A02G482000, TraesCS7D02G011400	AT3G60630, AT2G45160, AT4G00150	GRAS	AT4G00150.1	2e-84	GRAS family protein	6.20068e-06	0.000169545	0.6059	0.134066	1.58112	1.39333	1.54143	2.54566	3.0123	2.79851
TRITD7Bv1G035340								6.70467e-06	0.000181514	0.701412	0.15577	6.86669	9.65455	8.75171	13.9772	20.4206	17.2961
TRITD5Av1G143390	NAD(P)-binding domain	TraesCS5A02G225100, TraesCS5D02G232400, TraesCS5B02G223700	AT1G15950, AT1G80820					7.19074e-06	0.000191102	0.693574	0.154541	1.58922	2.13149	2.60795	4.03821	4.72264	3.82994
TRITD7Av1G051130	DnaJ domain	TraesCS7A02G159500, TraesCS7B02G064000, TraesCS7D02G160400	AT3G14200					7.4063e-06	0.000196206	0.682147	0.152208	2.72982	3.02204	3.0802	5.71096	5.9407	5.98782
TRITD4Bv1G032990	WD40 repeat	TraesCS4B02G092000, TraesCS4D02G089000						7.48231e-06	0.000197968	1.12977	0.252211	0.797149	0.720967	0.465013	2.27048	2.04817	1.8627
TRITD2Av1G193860		TraesCS2A02G318800, TraesCS2D02G316500, TraesCS2B02G337100						7.49891e-06	0.000198281	0.597692	0.133443	4.64115	3.65623	3.67746	7.95951	6.87406	7.04385
TRITD3Av1G239120		TraesCS3A02G416800, TraesCS3B02G451800, TraesCS3D02G412300						8.0205e-06	0.000210207	0.87987	0.197075	11.8821	7.34396	9.25993	19.1836	20.165	30.4024
TRITD7Av1G053460		TraesCS7A02G167400, TraesCS7D02G168100, TraesCS7B02G072100						8.70023e-06	0.00022533	0.82559	0.185643	5.58722	5.78809	5.12295	14.1807	11.8578	12.3069
TRITD2Av1G064510	Chlorophyll A-B binding protein, plant	TraesCS2A02G187200, TraesCS2D02G200700, TraesCS2B02G220100	AT3G61470, AT5G28450					8.88365e-06	0.000229369	0.636519	0.143273	105.025	135.813	83.93	196.949	208.118	200.651
TRITD5Bv1G235340	Pectinesterase inhibitor domain	TraesCS5B02G502800, TraesCS4A02G369800						9.3868e-06	0.000240424	0.686392	0.154913	4.50779	6.39408	5.34828	13.5419	9.55919	9.58994
TRITD4Bv1G152610		TraesCS4B02G255700, TraesCS4D02G255800, TraesCS4A02G049100						9.41623e-06	0.000240882	0.814018	0.183745	21.172	16.6574	13.1946	32.4297	49.046	34.6546
TRITD7Av1G031270	Cytochrome P450	TraesCS7A02G107800, TraesCS7D02G102100						9.84424e-06	0.000250406	0.838574	0.189698	0.58044	0.518673	0.563729	1.38758	1.62043	0.979988
TRITD4Av1G257000	HAD hydrolase, subfamily IA	TraesCS4A02G462400	AT2G38740					9.84859e-06	0.000250406	0.778127	0.176028	1.81353	1.73699	1.48042	3.43174	3.77969	3.86727
TRITD3Bv1G245430	Methyltransferase type 11		AT3G54150, AT3G61210, AT1G55450, AT4G22530, AT5G10830					9.9473e-06	0.000252608	1.23845	0.280299	0.87616	1.16655	0.548347	2.10322	3.03375	3.88913
TRITD5Bv1G141330	Zinc finger, RING-type	TraesCS5B02G246000, TraesCS5D02G255200, TraesCS5A02G248300						1.01986e-05	0.000257734	0.580837	0.131622	2.38531	2.87174	1.96727	4.18927	4.59476	4.10224
TRITD1Bv1G024660		TraesCS1B02G084000, TraesCS1D02G066800, TraesCS1A02G065800						1.03421e-05	0.000260413	0.611867	0.138749	3.46315	3.89238	3.82173	7.7815	7.18285	5.94517
TRITD4Bv1G208090	UDP-glucuronosyl/UDP-glucosyltransferase	TraesCS4B02G396400, TraesCSU02G030000	AT1G07250, AT2G29710, AT3G21780, AT3G21760, AT4G15280, AT3G21800, AT1G07240, AT2G29730, AT4G15260, AT2G29740, AT2G29750, AT4G15270, AT3G21750, AT3G21790, AT1G07260					1.04209e-05	0.000261172	0.619765	0.140592	1.94558	2.19135	2.06641	3.96265	4.27754	3.42435
TRITD7Av1G102420	F-box domain	TraesCS7A02G259000, TraesCS7D02G259900, TraesCS7B02G156500						1.05454e-05	0.000263622	1.13795	0.258292	0.451672	0.544213	0.274439	1.3136	1.31279	1.30605
TRITD4Bv1G093310	Transcription termination factor, mitochondrial/chloroplastic	TraesCS4B02G156500, TraesCS4D02G156100, TraesCS1A02G084300	AT2G36000					1.12505e-05	0.00027726	0.769461	0.175211	1.55787	1.36764	1.3092	2.736	4.30514	2.47184
TRITD6Av1G053370	Late embryogenesis abundant protein, LEA_2 subgroup	TraesCS6A02G148200, TraesCS6B02G176500, TraesCS6D02G137600						1.13494e-05	0.000279129	0.701129	0.159721	2.91057	2.90476	2.23051	4.6678	5.79073	5.91294
TRITD6Bv1G072670	Domain of unknown function DUF659							1.1536e-05	0.000282294	0.712562	0.162456	1.11747	0.740757	1.2865	2.12166	2.1606	2.0261
TRITD6Bv1G057380	Quinone oxidoreductase/zeta-crystallin, conserved site	TraesCS6B02G161600, TraesCS6A02G133100, TraesCS6D02G122800	AT1G23740					1.1759e-05	0.000286812	0.587588	0.134091	8.4327	8.82322	6.06737	14.8404	14.6671	12.3201
TRITD2Bv1G196630	Protein of unknown function DUF2358	TraesCS2D02G394100, TraesCS2B02G414700	AT2G46100					1.1823e-05	0.000287964	0.61517	0.140423	3.43388	2.73022	3.21604	6.74583	5.79082	5.02604
TRITD7Av1G037060	Pyridoxal phosphate phosphatase-related	TraesCS7A02G125100, TraesCS7B02G374300, TraesCS7D02G460300, TraesCS7B02G374400	AT1G73010, AT1G17710					1.29417e-05	0.000311212	0.930381	0.213337	0.749594	1.02245	0.583833	2.34981	2.20095	1.50315
TRITD3Bv1G173090	Cyclic nucleotide-binding domain	TraesCS3B02G328800, TraesCS3A02G294200, TraesCS3D02G294000	AT5G46240, AT4G18290					1.39291e-05	0.000330892	0.868484	0.199882	2.48152	2.37188	4.43233	7.53194	6.86426	7.03068
TRITD3Av1G264060	Cytochrome P450	TraesCS3A02G479700, TraesCS3B02G524300, TraesCS3B02G523800, TraesCS3D02G474600						1.41034e-05	0.000334517	0.714273	0.164494	0.764081	1.17682	1.18773	2.38109	2.15819	1.83386
TRITD2Av1G227590		TraesCS2A02G384800, TraesCS2D02G381500, TraesCS2B02G401800						1.4832e-05	0.000350007	0.587047	0.13554	9.89154	11.2002	9.83432	18.2084	18.0531	19.8237
TRITD7Av1G058510	AP2/ERF domain	TraesCS7A02G180900, TraesCS7B02G085900, TraesCS7D02G182700	AT5G65130, AT2G22200, AT1G36060, AT4G39780, AT1G22190, AT1G78080	ERF	AT1G78080.1	4e-64	related to AP2 4	1.62334e-05	0.000378792	0.607747	0.140968	1.77593	1.63156	2.09672	4.1294	3.23938	2.89211
TRITD4Bv1G044700	Leucine-rich repeat domain superfamily							1.64386e-05	0.000382509	0.728943	0.169188	5.1674	6.22999	4.48119	8.89918	13.9408	10.7789
TRITD5Av1G236780	Mlo-related protein	TraesCS5A02G489900, TraesCS4D02G318600						1.69895e-05	0.000392264	2.62802	0.611001	0.0276753	0.0238264	0	0.313878	0.384014	0.330193
TRITD3Av1G260670	Aspartic peptidase A1 family	TraesCS3A02G472000, TraesCS3D02G467700, TraesCS3B02G515200	AT5G48430					1.97842e-05	0.000444483	1.48476	0.347938	0.213653	0.160969	0.18261	0.442675	1.42951	1.01395
TRITD7Bv1G225070	NADH:flavin oxidoreductase/NADH oxidase, N-terminal	TraesCS7B02G455300, TraesCS7A02G537100, TraesCS7D02G524400						1.98177e-05	0.000444996	0.658709	0.154375	2.19348	1.89178	1.63884	3.26135	4.81457	3.21693
TRITD5Av1G044090		TraesCS5A02G083400, TraesCS2B02G022200						1.99777e-05	0.000447625	0.665067	0.155931	18.1456	18.4401	15.2655	36.6366	29.8555	35.0908
TRITD4Av1G016490	Glycoside hydrolase family 10 domain	TraesCS4A02G045500, TraesCS4B02G259100, TraesCS4D02G259500	AT4G33830, AT4G33860, AT4G33840					2.01626e-05	0.000451283	0.782037	0.183444	0.616282	0.723563	0.546882	1.36089	1.48211	1.31583
TRITD4Bv1G200230	FBD domain	TraesCS4B02G365300, TraesCSU02G138500, TraesCS5A02G533800						2.02902e-05	0.000453409	0.59739	0.140177	2.20815	1.65836	2.11881	3.18102	4.54856	3.30114
TRITD2Av1G068440	Armadillo	TraesCS2A02G193000, TraesCS2B02G213900, TraesCS2D02G194400	AT3G01400, AT5G58680					2.0938e-05	0.000465887	0.589547	0.138565	1.59837	2.13872	2.17515	2.99176	4.18311	3.57983
TRITD1Av1G005720		TraesCS1A02G030000, TraesCS1D02G030500	AT5G02160					2.12364e-05	0.00047102	0.681857	0.160381	13.5263	11.999	10.2399	20.6561	31.2954	20.4478
TRITD7Av1G228350	AP2/ERF domain	TraesCS7B02G324400		ERF	AT1G53910.1	9e-28	related to AP2 12	2.43609e-05	0.000527141	0.7672	0.181773	1.1984	1.09127	1.20413	3.3834	2.30374	2.10091
TRITD6Bv1G173670	Caleosin-related	TraesCS6B02G326300, TraesCS6D02G276700, TraesCS6A02G296500	AT1G70680, AT1G70670, AT1G23240, AT1G23250					2.45966e-05	0.000531414	0.621998	0.147446	126.596	158.093	97.3662	225.741	250.71	226.662
TRITD0Uv1G059950	Beta-grasp domain superfamily	TraesCS7A02G108600, TraesCS7D02G103500, TraesCS7B02G006600	AT3G16250					2.47858e-05	0.000534671	0.728012	0.172648	5.44333	9.48148	7.22237	13.7767	16.3284	15.2382
TRITD4Av1G017860		TraesCS4A02G049100, TraesCS4B02G255700, TraesCS4D02G255800						2.49332e-05	0.000537481	0.702895	0.166744	12.0165	11.2683	10.1261	17.2958	29.8321	22.6373
TRITD2Bv1G236760		TraesCS4B02G323700						2.49419e-05	0.000537481	0.607719	0.144169	0.998121	1.37988	1.43281	2.55137	2.52722	1.94344
TRITD3Av1G025540	Protein kinase domain	TraesCS3A02G088100, TraesCS3A02G088000, TraesCS3D02G088300						2.50991e-05	0.00054031	0.926068	0.219765	0.187087	0.246456	0.168566	0.480772	0.645375	0.428041
TRITD2Av1G250810		TraesCS2A02G432400, TraesCS2B02G453600, TraesCS2B02G453700, TraesCS2D02G430300, TraesCS2D02G430100						2.51579e-05	0.0005409	0.677752	0.160857	13.6655	10.7436	13.2604	23.3072	25.4223	25.8228
TRITD6Av1G016520	Leucine-rich repeat-containing N-terminal, plant-type	TraesCS6D02G066900, TraesCS6B02G093400						2.7363e-05	0.000582432	0.847247	0.201996	1.13469	0.694491	1.18654	2.27491	2.3683	2.33323
TRITD1Av1G211870	Protein Casparian strip integrity factor 1/2	TraesCS1A02G393900, TraesCS1D02G402600, TraesCS1B02G422900						2.7971e-05	0.000593252	1.10729	0.264308	1.50328	2.95192	2.65477	6.51855	8.08955	6.91107
TRITD5Av1G140710	Protein of unknown function DUF4228, plant	TraesCS5A02G200100, TraesCS5D02G205700, TraesCS5B02G198400, TraesCS5B02G198500						2.86666e-05	0.000604623	0.727148	0.173801	2.12461	2.90191	2.35819	4.5145	5.7942	5.12045
TRITD4Av1G210300	Gamma-glutamylaminecyclotransferase	TraesCS4A02G323800, TraesCS5B02G554500, TraesCS5D02G554300	AT5G46720, AT3G02910					3.25604e-05	0.000674468	0.595019	0.143213	5.47049	4.86195	5.49415	8.85858	11.1583	9.08507
TRITD7Av1G054050	Aspartic peptidase A1 family	TraesCS7A02G168800, TraesCS7D02G169700, TraesCS7B02G073700						3.33276e-05	0.000687968	0.828954	0.199774	0.649624	0.53875	0.6446	1.43869	1.95297	1.01378
TRITD5Bv1G224780	Photosystem I PsaD	TraesCS5B02G466700, TraesCS5A02G457500, TraesCS5D02G468400	AT1G03130, AT4G02770					3.39487e-05	0.000699404	0.80155	0.193367	107.425	91.5842	64.9143	153.432	233.973	200.848
TRITD3Bv1G169930	Peptidase S10, serine carboxypeptidase	TraesCS3A02G288000, TraesCS3D02G287800						3.53022e-05	0.000721583	0.788117	0.190539	1.65166	2.02724	1.26387	2.76298	4.26305	3.92864
TRITD6Bv1G189090		TraesCS6B02G353500, TraesCS6D02G302700, TraesCS6A02G322900, TraesCS6A02G323000						3.62131e-05	0.000739115	0.661849	0.160238	10.1547	7.18578	7.68511	12.9747	18.1836	17.9387
TRITD5Av1G005460		TraesCS1A02G103800, TraesCS5D02G019300, TraesCS5B02G011500, TraesCSU02G210700						3.97126e-05	0.000798042	0.859226	0.209101	0.940455	0.512523	0.571366	1.44968	1.86346	1.42749
TRITD7Bv1G004390								4.04528e-05	0.000809405	0.890219	0.216869	8.9238	5.16495	6.02825	14.2298	21.6212	13.8108
TRITD5Av1G044080								4.16603e-05	0.000828793	0.790881	0.192988	4.87743	5.18902	2.87918	8.56412	9.45988	10.0361
TRITD3Bv1G252790	Agenet-like domain	TraesCS3B02G509700, TraesCS3A02G465800						4.19139e-05	0.000832646	0.655886	0.160102	0.927824	1.11593	1.23943	1.91861	2.15422	2.29528
TRITD7Bv1G211440	Signal transduction response regulator, receiver domain	TraesCS7B02G408700, TraesCS7A02G502300, TraesCS7D02G489600	AT3G62670	ARR-B	AT2G25180.1	3e-84	response regulator 12	4.31034e-05	0.000850604	1.2159	0.297272	0.282713	0.356579	0.440604	1.09814	1.08899	1.58935
TRITD3Bv1G169760	Phosphatase PHOSPHO-type	TraesCS3B02G322000, TraesCS3D02G287000	AT1G73010, AT1G17710					4.40476e-05	0.000862299	0.863708	0.211426	2.0366	2.17849	1.83209	4.94324	4.30971	5.32167
TRITD7Av1G270510	Protein kinase domain	TraesCS7B02G448200, TraesCS7D02G518500	AT5G02290, AT3G55450, AT2G39660					4.48446e-05	0.000874208	1.0236	0.250822	0.306997	0.648721	0.572429	1.50961	1.5939	1.11999
TRITD6Bv1G211220		TraesCS6B02G402300, TraesCS6D02G350000, TraesCS6A02G367000	AT1G19660, AT1G75380					4.48742e-05	0.000874376	0.608208	0.14904	5.24398	5.32415	5.37303	8.4519	9.17814	12.2931
TRITD5Bv1G221610		TraesCS5B02G457900						4.53201e-05	0.000882205	0.676545	0.165879	11.5855	7.04293	7.64501	16.4495	17.0583	17.565
TRITD5Bv1G079350	Cytochrome P450	TraesCS5B02G128100, TraesCS5A02G129500, TraesCS5D02G137000	AT2G27690					4.71495e-05	0.000911469	1.07882	0.265111	0.478065	0.720993	0.454141	1.04529	1.91987	2.16826
TRITD4Bv1G180060	Protein of unknown function DUF677	TraesCS4B02G314700, TraesCS4A02G414000, TraesCS4D02G311800	AT3G49070					4.77948e-05	0.00092053	1.28227	0.315353	0.443203	0.29588	0.22404	0.902877	1.58886	1.08078
TRITD5Av1G214880	Transcription termination factor, mitochondrial/chloroplastic	TraesCS5A02G423600, TraesCS5B02G425900, TraesCS5D02G432100	AT2G34620					4.8618e-05	0.00093509	0.840578	0.206928	0.918711	0.756867	0.979942	1.78724	2.85011	1.75403
TRITD3Bv1G174420	Dynein light chain, type 1/2	TraesCS3B02G330900, TraesCS3A02G305600, TraesCS3D02G296300	AT1G52245, AT3G16120					5.08576e-05	0.000969665	0.630326	0.155573	8.71401	9.05369	8.59292	17.1777	17.0861	15.8346
TRITD4Av1G193170	B-box-type zinc finger	TraesCS4A02G268500, TraesCS4B02G045700, TraesCS4D02G046200		CO-like	AT1G25440.1	3e-67	B-box type zinc finger protein with CCT domain	5.13285e-05	0.000974634	0.631239	0.155881	1.71108	1.47457	1.29	2.6549	3.17802	2.64119
TRITD2Av1G284060	Exostosin-like	TraesCS2A02G547000, TraesCS7D02G415500, TraesCS2B02G577800	AT1G34270					5.29301e-05	0.000999661	0.611847	0.151361	1.11696	1.22119	1.24764	2.40356	2.24063	2.03945
TRITD2Av1G077110	Protein of unknown function wound-induced	TraesCS2B02G233100, TraesCS2D02G210300						5.32934e-05	0.00100553	1.06313	0.263106	2.24695	4.88652	4.43394	12.5279	11.2796	8.87777
TRITD4Bv1G173700	AP2/ERF domain	TraesCS4B02G299500, TraesCS4D02G298400, TraesCS4A02G005600		ERF	AT1G72360.3	1e-35	ERF family protein	5.62903e-05	0.00105255	1.07417	0.266686	0.340363	0.414639	0.645426	1.31949	1.10378	1.73283
TRITD5Bv1G196840	FAD-binding domain	TraesCS5B02G386000, TraesCS5D02G391600						5.93435e-05	0.00109637	0.614947	0.153147	1.30374	1.43703	1.18866	2.47943	2.27462	2.57409
TRITD3Bv1G019020		TraesCS4B02G253400, TraesCS3A02G196800						5.96507e-05	0.00110156	0.788898	0.196527	9.87816	5.93006	10.2332	21.0575	16.8608	18.7317
TRITD5Bv1G109490	Basic-leucine zipper domain	TraesCS5B02G176700, TraesCS5A02G179000, TraesCS5D02G183500		bZIP	AT1G75390.1	4e-27	basic leucine-zipper 44	6.18741e-05	0.00113608	0.590349	0.147383	5.72395	5.38719	4.28833	9.28085	9.66682	8.94684
TRITD3Bv1G099260	Piezo non-specific cation channel, R-Ras-binding domain	TraesCS3B02G222000, TraesCS3A02G192500, TraesCS3D02G196400	AT2G48060					6.26516e-05	0.00114833	0.606486	0.151523	1.95152	2.69728	2.69613	3.9542	5.55957	4.0517
TRITD4Av1G247240	Zinc finger, RING-type	TraesCS4A02G429100, TraesCS7D02G055500	AT3G54070, AT3G54065, AT5G15500, AT5G54610, AT1G14480, AT1G14500, AT5G54620, AT4G10720					6.60562e-05	0.00120227	0.604561	0.151517	3.61289	3.47132	2.40428	5.90723	6.46086	4.95673
TRITD1Bv1G176400	Transcription termination factor, mitochondrial/chloroplastic	TraesCS1B02G325200, TraesCS1A02G313400, TraesCS1D02G313900	AT1G61990, AT1G62110, AT3G46950, AT1G21150, AT1G56380, AT1G61970, AT1G61960, AT1G62085, AT1G62150, AT5G23930, AT1G62120, AT1G61980, AT5G07900, AT1G62010, AT1G62490					6.73543e-05	0.0012211	0.614306	0.154137	1.32917	1.54621	1.3334	2.34264	3.21527	2.3697
TRITD1Av1G191960	Photosystem II PsbW, class 2	TraesCS1A02G326100, TraesCS1D02G328000, TraesCS1B02G339500						7.19929e-05	0.00129228	0.631413	0.159062	5.69632	6.20648	4.63971	8.17052	12.9125	10.6243
TRITD5Bv1G079130	Fibronectin type III	TraesCS5B02G127800, TraesCS5A02G129200, TraesCS5D02G136700	AT3G52810, AT3G52820					7.72612e-05	0.001368	0.791069	0.200132	1.85336	1.75168	2.08379	4.80201	3.7906	4.10233
TRITD7Av1G004830		TraesCS7A02G024000, TraesCS6B02G258200, TraesCS6B02G135700						7.79765e-05	0.00137805	0.64931	0.16436	2.57641	3.42973	3.54608	4.88582	7.58914	6.11769
TRITD3Bv1G258860	Major pollen allergen Lol pI	TraesCS3B02G524500, TraesCS3A02G480000, TraesCS3D02G474800	AT2G45110, AT1G65681, AT3G60570					7.82069e-05	0.00138012	0.762647	0.193084	1.1629	1.22555	0.854193	1.93217	3.19382	2.03219
TRITD4Av1G048060	ABC transporter-like	TraesCS4A02G103400, TraesCS4D02G201700, TraesCS4B02G200600	AT2G39350, AT5G13580, AT3G55100, AT3G55130, AT3G55110, AT3G53510, AT3G55090, AT2G37360					8.19139e-05	0.00143274	0.605679	0.153775	3.16417	3.65603	2.52338	4.85932	7.02239	5.36877
TRITD7Bv1G034940		TraesCS7B02G085600, TraesCS7A02G180600, TraesCS7D02G182400						8.27247e-05	0.00144389	0.794761	0.201902	1.1942	1.21898	1.55127	2.48309	3.93239	2.64352
TRITD6Bv1G172650	B-box-type zinc finger	TraesCS6B02G323400, TraesCS6A02G293200, TraesCS6D02G274100	AT1G68520, AT1G25440, AT1G73870, AT1G49130	CO-like	AT1G25440.1	3e-78	B-box type zinc finger protein with CCT domain	8.53144e-05	0.00147857	0.67796	0.172555	1.46282	1.21382	1.49746	2.23608	2.7697	3.39559
TRITD2Av1G267500	Glycoside hydrolase, family 32	TraesCS2A02G488900, TraesCS2D02G489200, TraesCS2B02G516700						8.71364e-05	0.00150079	1.68954	0.430579	0.370165	0.439211	0.124565	1.07392	1.54919	2.17353
TRITD3Av1G029210		TraesCS3A02G097400, TraesCS3D02G097900, TraesCS3B02G113100						8.7791e-05	0.00150895	0.607548	0.154905	2.53238	2.61003	3.13242	5.70921	3.95521	5.85605
TRITD4Bv1G139920	Zinc finger C2H2-type	TraesCS4B02G230800, TraesCS4D02G232000, TraesCS4A02G074700	AT2G01940	C2H2	AT1G68130.1	1e-110	indeterminate(ID)-domain 14	8.85346e-05	0.0015186	0.598445	0.152663	1.58477	2.28302	2.37165	3.33031	4.13448	3.88785
TRITD1Av1G021580		TraesCS1D02G066800, TraesCS1B02G084000, TraesCS1A02G065800						9.35965e-05	0.00158844	0.596006	0.152563	3.1544	4.06454	2.73643	6.38105	6.84337	4.94831
TRITD5Bv1G006240		TraesCS5B02G016800, TraesCS5A02G019300						9.61031e-05	0.00162174	0.688405	0.176504	1.09616	1.36483	1.16192	2.37513	2.61935	2.29319
TRITD1Bv1G116690	Alpha/beta hydrolase fold-1	TraesCS1B02G197000, TraesCS1D02G187100, TraesCS1A02G189300						9.65545e-05	0.00162738	0.597888	0.15334	1.71241	1.733	1.45317	2.66621	2.99314	3.34833
TRITD0Uv1G023440	NPR1/NH1-interacting protein	TraesCS3B02G040800, TraesCS3D02G037900, TraesCS3A02G042700						9.92928e-05	0.00166545	0.59978	0.154093	4.92576	5.79725	5.05443	8.23317	12.9016	8.50685
TRITD3Bv1G010400	NPR1/NH1-interacting protein	TraesCS3B02G040800, TraesCS3D02G037900, TraesCS3A02G042700						9.92928e-05	0.00166545	0.59978	0.154093	4.92576	5.79725	5.05443	8.23317	12.9016	8.50685
TRITD4Av1G261340	Glycoside hydrolase, family 32	TraesCS4A02G484800	AT1G12240, AT1G62660					0.00010284	0.00171391	0.711212	0.183123	1.92055	2.32555	1.74266	4.28599	3.01869	5.2003
TRITD6Av1G005420	Protein kinase domain	TraesCSU02G079900, TraesCS6B02G039900, TraesCS6D02G031600	AT2G28250					0.000108889	0.00178899	0.633381	0.163669	0.704724	0.899738	1.20646	1.6218	1.96968	1.65079
TRITD6Av1G213430	Bifunctional nuclease domain	TraesCS6A02G367000, TraesCS6B02G402300, TraesCS6D02G350000	AT1G19660, AT1G75380					0.000110856	0.00181973	0.658973	0.170475	3.58125	3.80296	3.43277	6.96156	6.11876	8.14936
TRITD2Av1G243530	Zinc finger, FYVE/PHD-type	TraesCS2A02G413800, TraesCS2B02G432600, TraesCS2D02G410800						0.000113681	0.0018582	0.646973	0.167637	3.1818	3.4339	3.62376	6.00435	6.19813	7.68364
TRITD2Av1G028400	NADH-ubiquinone reductase complex 1 MLRQ subunit	TraesCS2A02G106900, TraesCS2D02G106400, TraesCS2B02G123400						0.000117394	0.00190397	0.840754	0.218292	3.42606	3.85794	3.89378	6.56629	10.2126	10.1831
TRITD7Bv1G014190								0.00012215	0.00196732	0.833772	0.217028	2.2364	1.35125	2.15599	3.56689	5.24786	4.51501
TRITD5Bv1G113750	WRKY domain	TraesCS5B02G183800, TraesCS5A02G185700, TraesCS5D02G190800	AT2G46400	WRKY	AT2G46400.1	8e-36	WRKY DNA-binding protein 46	0.000127752	0.00203944	1.06982	0.279272	0.909869	0.390072	0.948576	2.13546	2.13472	1.96562
TRITD2Av1G244410								0.000129291	0.00205691	0.785869	0.205305	12.1999	10.8543	8.09005	22.8039	25.014	20.6693
TRITD3Bv1G178960	NB-ARC	TraesCS3B02G349500						0.000132323	0.00209556	0.767912	0.200914	0.243385	0.292229	0.193218	0.516684	0.546402	0.513014
TRITD7Av1G026830	Early nodulin 93 ENOD93 protein	TraesCS7A02G092000, TraesCS7D02G088500, TraesCSU02G258300						0.000134702	0.00212596	2.09822	0.549602	0.350696	0.442211	0.197047	2.58925	3.82985	3.33163
TRITD1Av1G127910	Nucleic acid-binding, OB-fold	TraesCS1A02G195000						0.00013482	0.00212702	1.34235	0.351633	0.543091	0.217334	0.641417	1.40409	1.50083	2.16885
TRITD4Av1G187350		TraesCS4A02G255700, TraesCS4D02G059000, TraesCS4B02G059500	AT1G17870					0.000139622	0.00218459	1.01437	0.266321	0.256566	0.456856	0.271472	1.13446	1.04606	0.604544
TRITD6Bv1G128400	Major pollen allergen Lol pI	TraesCS6B02G245700, TraesCS6D02G198400, TraesCS6A02G217100	AT2G45110, AT1G65681, AT3G60570					0.000140604	0.00219667	0.698589	0.183496	2.09444	2.01662	1.3493	3.34438	3.79609	3.80226
TRITD7Bv1G129580	Protein DMP	TraesCS7B02G225000, TraesCS7A02G324500, TraesCS7D02G320400	AT3G02430, AT4G24310					0.000141062	0.00220217	0.669665	0.175936	2.287	1.81447	1.91904	3.98679	3.92608	3.93699
TRITD1Bv1G210790	Photosystem I PsaH, reaction centre subunit VI							0.00014195	0.00221107	0.583772	0.153433	87.5372	105.702	74.8794	152.559	198.395	134.586
TRITD1Av1G001600	Snf7 family	TraesCS1A02G005100, TraesCS1B02G006600	AT3G10640, AT5G04850					0.00014279	0.00222	0.697678	0.183441	3.45927	5.01764	3.83856	8.89492	8.00079	7.94257
TRITD2Av1G282740	FAD linked oxidase, N-terminal	TraesCS2A02G542600, TraesCS2D02G543700, TraesCS2B02G572400	AT1G34575, AT1G26410, AT4G20800, AT1G01980, AT1G26420, AT1G11770, AT1G30700, AT1G26390, AT4G20830, AT1G26400, AT1G30730, AT2G34810, AT1G26380, AT4G20840, AT1G30720, AT1G30740, AT1G30710					0.000144589	0.00223879	0.71653	0.188551	1.33101	0.952942	0.723799	1.92891	2.3155	1.82268
TRITD1Av1G190310	SPEAR family	TraesCS1A02G321400, TraesCS1A02G321500, TraesCS1D02G321600, TraesCS1B02G336800, TraesCS1D02G321500, TraesCS1B02G333900, TraesCS1D02G324800						0.000149182	0.00229967	0.921162	0.242895	3.77295	6.40005	6.66983	17.4328	15.1201	10.1908
TRITD7Bv1G069820	HECT domain	TraesCS7A02G244000						0.000150226	0.00231112	0.58592	0.154568	1.81137	2.28319	1.69528	3.30246	3.42605	3.70571
TRITD5Bv1G128220	Chlorophyll A-B binding protein, plant	TraesCS5B02G210800, TraesCS5A02G213000, TraesCS5D02G219100	AT1G19150					0.000152374	0.0023385	0.615456	0.162511	3.77797	5.87492	5.54136	7.85711	10.3292	9.83295
TRITD6Av1G010760		TraesCS6A02G053000, TraesCSU02G132300, TraesCS6B02G071600	AT3G50685					0.000153504	0.00234978	0.633603	0.167384	3.62374	3.81966	2.91647	5.74798	8.76148	5.55227
TRITD4Bv1G029490	Peptidase S8/S53 domain	TraesCS4B02G085500, TraesCS4A02G230400						0.00015466	0.00236054	0.886442	0.234294	0.411009	0.640542	0.546634	1.20407	1.38683	1.32617
TRITD5Bv1G095410	Alpha/beta hydrolase fold-1	TraesCS5B02G156000, TraesCS5D02G163100, TraesCS5A02G157700	AT3G55180, AT2G39420, AT2G39400, AT3G55190, AT2G39410					0.00015714	0.00239402	0.683605	0.180872	0.900201	1.33941	1.07009	1.8379	2.38125	2.38559
TRITD7Av1G037280		TraesCS4B02G253400, TraesCS1B02G319800						0.000159849	0.00242643	0.806202	0.21355	8.4475	6.05457	7.23692	14.4091	17.4454	17.2624
TRITD0Uv1G028890	FAD/NAD(P)-binding domain superfamily	TraesCSU02G062000, TraesCS1A02G407600, TraesCS5B02G529400, TraesCS5D02G528500	AT1G57770					0.000160033	0.00242745	0.772103	0.204533	1.06994	0.755133	0.890421	1.39376	2.50954	2.17012
TRITD2Av1G061990	Protein kinase domain	TraesCS2A02G182400, TraesCS2B02G208900, TraesCS2D02G190200	AT1G74360					0.000165691	0.00249692	0.674662	0.179132	0.379346	0.349554	0.317442	0.687619	0.620382	0.773501
TRITD6Av1G161330	Protein of unknown function DUF241, plant	TraesCS6A02G253500, TraesCS6D02G235000, TraesCS6B02G271900						0.000168884	0.00252859	0.81171	0.215793	0.948695	0.647937	0.71955	1.95243	2.25462	1.20668
TRITD7Bv1G204660	FKBP-type peptidyl-prolyl cis-trans isomerase domain	TraesCS7B02G388800, TraesCS7D02G472600, TraesCS7A02G485300	AT5G45680					0.000183343	0.00269666	0.665539	0.177908	3.10316	2.5185	1.75384	4.35437	5.25289	4.59475
TRITD2Av1G012260	Glycoside hydrolase family 18, catalytic domain	TraesCS2A02G058100, TraesCS1B02G064600, TraesCS1B02G065000, TraesCS2D02G057000						0.000183641	0.00269819	1.56892	0.419439	0.457068	0.270516	0.216817	0.738133	2.49542	2.00266
TRITD4Av1G254330	Aspartic peptidase A1 family	TraesCS4A02G450900, TraesCSU02G168200, TraesCS4D02G094300, TraesCS4B02G098100						0.00018471	0.00270928	0.711686	0.190338	1.50708	2.76307	2.35332	4.91839	4.20438	4.11674
TRITD2Bv1G069570	Cytochrome P450	TraesCS2B02G201900, TraesCS2A02G175700, TraesCS2D02G183000	AT1G13710, AT1G74110					0.000187329	0.00274271	0.708488	0.189663	0.555252	0.643205	0.599776	1.0006	1.4016	1.33449
TRITD1Bv1G103820	Domain of unknown function DUF547	TraesCS1B02G175600, TraesCS1A02G159200, TraesCS1D02G156600	AT3G11920					0.0001923	0.00280368	1.02765	0.275588	0.34531	0.616745	0.462884	1.17836	1.31559	1.53945
TRITD3Bv1G054050	Embryo-specific ATS3	TraesCS3B02G148700, TraesCS3A02G129600, TraesCS3D02G130500	AT2G41475					0.000199159	0.00288352	0.618206	0.166181	4.46406	6.93714	4.83485	8.81951	11.9243	9.34271
TRITD6Av1G026800	AP2/ERF domain	TraesCS6A02G097500, TraesCSU02G183700, TraesCS6D02G085000, TraesCS6B02G126600, TraesCS6B02G126700		ERF	AT1G72360.1	5e-32	ERF family protein	0.000199969	0.00288992	0.682642	0.183552	0.789058	0.830101	1.0322	2.03979	1.448	1.848
TRITD3Bv1G004510	TRAF-like	TraesCSU02G166900, TraesCS3A02G028500, TraesCS3D02G017400						0.000200216	0.00288992	0.624026	0.167805	1.19673	1.77535	1.35009	2.41214	2.90094	2.737
TRITD2Av1G278730	Chlorophyll A-B binding protein	TraesCS2A02G523700, TraesCS2B02G553600, TraesCS2D02G525900	AT2G21970					0.000206578	0.00296214	0.898872	0.242229	5.17003	4.204	2.47835	9.32665	11.3583	7.80611
TRITD6Bv1G055080		TraesCS6B02G157200, TraesCS6D02G117100						0.00021072	0.0030122	0.620981	0.16757	1.3962	1.35215	1.66302	2.49618	3.06212	2.73945
TRITD5Bv1G163710	AAA+ ATPase domain	TraesCS5B02G299200, TraesCS5D02G306600, TraesCS5A02G301500	AT5G08470					0.000217627	0.00308556	0.628075	0.169859	0.368414	0.413189	0.365242	0.684275	0.75956	0.7274
TRITD6Av1G155070	Pectinesterase inhibitor domain	TraesCS6A02G241600, TraesCS6B02G283000						0.000223908	0.00315956	0.60794	0.164736	49.0079	70.1024	43.4305	85.991	99.6295	109.935
TRITD5Bv1G097770	Proton-dependent oligopeptide transporter family	TraesCS5B02G152000, TraesCS5A02G153200, TraesCS5D02G158500	AT3G45650, AT3G45710, AT3G45680, AT3G45690, AT3G45700, AT3G45660, AT3G45720					0.000226878	0.00319607	1.06886	0.289896	0.454608	0.587194	0.494384	0.898404	2.39207	1.59826
TRITD2Bv1G192020	Senescence regulator S40	TraesCS2B02G407800, TraesCS2D02G387500, TraesCS2A02G391200						0.000231723	0.00324309	0.583907	0.158599	4.95591	5.87178	6.39978	8.65951	13.3793	9.51364
TRITD5Bv1G040800	Casparian strip membrane protein domain	TraesCS5B02G088800, TraesCS5A02G082700, TraesCS5D02G095200	AT3G55390					0.000234226	0.00326538	0.771763	0.20978	2.4367	3.46463	2.14259	5.12658	7.79708	4.77412
TRITD6Bv1G148270	Protein kinase domain	TraesCS6B02G270400, TraesCS6A02G255100, TraesCS6D02G236400						0.000235205	0.00327684	0.628145	0.170791	1.82167	1.11441	1.62615	3.35325	2.61122	2.54271
TRITD5Bv1G235200	GRAM domain	TraesCS5B02G502200, TraesCS5D02G503400, TraesCS5A02G488500	AT5G13200					0.000240996	0.00334077	0.613177	0.167004	2.59832	2.34663	2.37592	4.70066	4.27045	4.67368
TRITD7Av1G263950	GNAT domain	TraesCS7B02G106100, TraesCS2B02G156100, TraesCS6B02G203800						0.000243777	0.00336925	0.580172	0.158141	2.69561	3.39925	3.14578	5.76089	5.08414	5.77457
TRITD3Bv1G032870	Alpha/Beta hydrolase fold	TraesCS3D02G097100	AT4G16070					0.000247326	0.003407	1.37037	0.373907	0.601471	0.66035	0.389651	2.25287	2.19981	2.3148
TRITD4Av1G255310		TraesCS3D02G491100						0.000247434	0.00340737	0.953876	0.260273	0.312899	0.359257	0.371189	1.30894	0.776392	0.780099
TRITD4Bv1G023460	EF-hand domain	TraesCS4B02G069900, TraesCS4D02G068700, TraesCS4A02G245500						0.000247833	0.00341174	0.621267	0.169537	3.1182	2.84911	3.20418	5.91881	7.56766	4.21958
TRITD5Bv1G195860	CDC50/LEM3 family	TraesCS5B02G384100, TraesCS5A02G380500, TraesCS5D02G390300						0.000262721	0.00356956	0.908832	0.249027	0.765336	1.12025	0.491781	1.93753	2.17702	1.62703
TRITD7Bv1G029320	Aspartic peptidase A1 family	TraesCS7B02G073700, TraesCS7D02G169700, TraesCS7A02G168800						0.000290613	0.00386908	0.663573	0.183129	0.897219	0.687871	0.810751	1.23938	1.74822	1.75643
TRITD2Av1G225700	Protein kinase domain	TraesCS2A02G381600, TraesCS2D02G378100, TraesCS2B02G398900	AT1G08650, AT3G04530					0.00029708	0.00393508	0.86447	0.238947	1.99494	1.70256	3.11408	5.40982	6.96409	3.93058
TRITD2Bv1G029870	Wound-induced protein Wun1-like	TraesCS2A02G092200, TraesCS2B02G107100, TraesCS2D02G091300						0.000311488	0.00409189	0.72453	0.200948	6.1496	5.40606	4.51386	8.80226	15.916	9.8367
TRITD3Bv1G283300	Oxoglutarate/iron-dependent dioxygenase	TraesCS3B02G603000, TraesCS3A02G537300, TraesCS3D02G542800	AT3G47190, AT5G58660					0.000311529	0.00409189	0.698949	0.193855	0.742825	1.30808	1.00701	1.85208	2.1718	2.07003
TRITD2Bv1G204060	Cyclin P/U	TraesCS2B02G432000, TraesCS2D02G411300, TraesCS2A02G413300	AT3G60550, AT2G45080					0.000320747	0.00418215	0.592321	0.164628	2.35372	2.38619	2.00706	4.11053	4.22915	3.96217
TRITD3Bv1G280790	Zinc finger, RING-type	TraesCS3B02G609500, TraesCS3A02G532700, TraesCS7D02G304700, TraesCS3D02G537900	AT2G28840					0.000321286	0.00418786	0.77521	0.215485	1.02676	0.476539	0.707674	1.54653	1.55323	1.54838
TRITD2Bv1G145970	Heparan-alpha-glucosaminide N-acetyltransferase, catalytic domain	TraesCS2B02G307400, TraesCS2A02G291000, TraesCS2D02G288900	AT5G47900					0.000321609	0.00419072	0.70951	0.197237	1.0355	0.6288	0.97218	1.88381	1.48198	1.98985
TRITD2Bv1G129840		TraesCS1B02G462100, TraesCS2B02G282600, TraesCS2A02G172900						0.00032471	0.00421805	0.854745	0.237776	7.66147	6.82968	6.20161	17.9591	17.7519	13.9464
TRITD5Av1G124590	FAS1 domain	TraesCS5A02G167900, TraesCS5B02G164700, TraesCS5D02G172100	AT4G12730					0.000325512	0.00422578	0.732714	0.203866	0.741731	0.772447	0.748028	1.69177	1.63718	1.45876
TRITD2Av1G094230	Zinc finger, Dof-type	TraesCS2A02G225900, TraesCS2D02G231600, TraesCS2B02G249200		Dof	AT5G60200.1	7e-38	TARGET OF MONOPTEROS 6	0.000331052	0.00428569	0.605012	0.168541	1.23313	1.55451	1.36262	2.12544	3.11938	2.49817
TRITD4Bv1G041870	Protein kinase domain	TraesCS4B02G108900, TraesCS4A02G205100, TraesCS4D02G106000	AT5G47850					0.000346066	0.00444829	0.607364	0.169744	0.615299	0.476379	0.503301	0.924762	1.06964	0.953303
TRITD4Av1G017900	BTB/POZ domain	TraesCS4A02G049300, TraesCS4D02G255500, TraesCS4B02G255500	AT5G67385, AT3G49970					0.000347444	0.00446129	0.670855	0.187542	1.3506	0.999578	0.94615	1.60881	2.74331	2.23776
TRITD3Bv1G173700	Protein of unknown function DUF4228, plant	TraesCS3B02G330000, TraesCS3D02G295400, TraesCS3A02G306500						0.000374463	0.00474404	0.786818	0.221174	1.56192	1.26515	1.55975	2.90352	4.44387	2.67446
TRITD2Bv1G157230	Alpha crystallin/Hsp20 domain	TraesCS2B02G329900						0.000379144	0.00479077	1.62089	0.45605	0.829073	0.177842	0.70707	2.2622	2.56086	2.80247
TRITD4Av1G010250	Ovate protein family, C-terminal	TraesCS4A02G030800, TraesCS4B02G275200, TraesCS4D02G273800						0.000388283	0.00488405	0.77676	0.218934	1.61735	1.04261	1.18171	2.13282	3.95587	2.5704
TRITD2Av1G026910	Ricin B-like lectins	TraesCS2A02G101800, TraesCS2B02G118700, TraesCS2D02G101200	AT2G39050					0.000418302	0.005185	0.624466	0.17699	4.59767	4.97407	3.04525	6.69005	9.10438	7.60009
TRITD3Av1G143130	Retrotransposon gag domain							0.000426432	0.00526543	0.895872	0.254281	1.41539	0.645105	1.29659	3.02651	2.58557	2.3178
TRITD7Av1G174220	GNAT domain	TraesCS7A02G327800, TraesCS7D02G324600, TraesCS7B02G228500	AT1G26220					0.000431283	0.00530776	0.766834	0.217841	1.39908	1.3933	1.62607	3.286	4.49552	2.25398
TRITD3Av1G057540	PPM-type phosphatase domain	TraesCS3A02G144400, TraesCS3D02G153000, TraesCS3B02G170900						0.000446225	0.00545171	0.590442	0.168163	5.51404	6.34384	3.65652	9.34356	9.28019	8.86417
TRITD7Bv1G218380	SANT/Myb domain			MYB_related	AT1G17460.2	1e-12	TRF-like 3	0.000451099	0.00549676	0.594681	0.16951	1.88307	1.51521	2.10073	2.73049	3.49779	3.86106
TRITD7Av1G045340	SWEET sugar transporter	TraesCS7A02G147300, TraesCS7B02G050500, TraesCS7D02G149000	AT5G23660, AT5G50800, AT5G13170, AT5G50790, AT3G48740, AT4G25010					0.000452293	0.0055081	0.600051	0.171075	4.36801	2.61758	3.76809	7.61504	5.8899	5.95076
TRITD7Av1G264880	Signal transduction response regulator, receiver domain		AT2G25180, AT4G31920	ARR-B	AT2G25180.1	3e-74	response regulator 12	0.000470789	0.00569013	0.747697	0.21382	1.32603	1.39649	0.722813	2.39329	2.55926	2.17023
TRITD7Bv1G119100	AMP-dependent synthetase/ligase	TraesCS7B02G210000, TraesCS7D02G306700, TraesCS7A02G310100	AT1G30520					0.000480326	0.0057786	0.681239	0.195114	0.761828	0.858746	1.32346	1.82039	1.85775	2.04978
TRITD7Bv1G000660	Protein kinase domain							0.000481713	0.00578694	0.634791	0.181851	2.29817	1.56204	2.85958	3.8904	4.65667	3.89979
TRITD5Bv1G230510	Ubiquitin-like domain	TraesCS5B02G486400, TraesCS5D02G486200, TraesCS5A02G473500						0.000483034	0.00579759	1.01069	0.289598	0.75045	1.19495	0.450879	1.74724	2.31468	2.24674
TRITD2Av1G276730	VQ	TraesCS2A02G517000, TraesCS2D02G518600, TraesCS2B02G545500						0.000494966	0.00591717	0.808684	0.232149	0.904875	1.13738	0.891105	2.2129	2.33375	2.15129
TRITD7Av1G002810	HPT domain superfamily	TraesCS7A02G016100, TraesCS7D02G012700						0.000533161	0.00627838	0.827461	0.238908	6.9385	5.09131	3.51146	14.8625	11.5233	9.02524
TRITD6Av1G066490	Glycoside hydrolase family 17	TraesCS6A02G164100, TraesCS6B02G188000, TraesCS6D02G148900	AT2G26600, AT3G15800					0.000536181	0.0063086	0.582739	0.168324	1.19078	1.20297	0.873961	1.63807	2.31995	1.95341
TRITD5Av1G139810	Zinc finger, RING-type	TraesCS5A02G198500, TraesCS5B02G197200, TraesCS5D02G204500	AT1G23980, AT5G40250					0.000544074	0.00638055	0.62254	0.180026	1.28936	1.3921	0.842394	1.97089	2.36457	2.17773
TRITD3Bv1G231920		TraesCS3B02G451800, TraesCS3A02G416800, TraesCS3D02G412300						0.000549651	0.00642539	0.778814	0.225396	11.8257	6.41456	10.1361	21.1026	15.4662	25.3166
TRITD5Bv1G246170	Cytochrome P450	TraesCS5B02G548600, TraesCS4A02G339100, TraesCS5D02G535400, TraesCSU02G084800, TraesCSU02G084600						0.00055494	0.00647269	0.615117	0.178154	5.93183	5.59926	3.74472	7.72362	11.0699	9.38153
TRITD6Bv1G004410	Signal transduction histidine kinase, phosphotransfer (Hpt) domain	TraesCS6D02G021700, TraesCS6D02G021500, TraesCS6D02G023100, TraesCS6A02G020400						0.000562255	0.00654155	0.658651	0.190958	7.03031	8.52988	4.93821	11.1509	12.6445	15.6149
TRITD3Bv1G002740	Major pollen allergen Lol pI	TraesCS3D02G000500, TraesCS3A02G011100	AT2G45110, AT1G65681, AT3G60570					0.000593988	0.00683102	1.12972	0.328947	0.687685	0.881057	0.684286	2.10267	2.87667	2.3173
TRITD6Av1G202910	Peptidase S8/S53 domain	TraesCS7B02G452500	AT3G14067					0.000605199	0.00692904	0.617124	0.179958	0.490782	0.544289	0.399936	0.941528	0.862959	0.86822
TRITD6Av1G016510	Glycoside hydrolase, family 32	TraesCS6A02G069000, TraesCS6D02G066800						0.000607115	0.00694717	0.583465	0.170185	0.818417	0.705534	0.767428	1.25307	1.58791	1.32304
TRITD7Bv1G120900	Probable transposase, Ptta/En/Spm, plant	TraesCS7B02G213600, TraesCS7D02G309600, TraesCS7A02G313200						0.000635003	0.00721015	0.924888	0.270735	0.796563	0.566521	0.321122	1.46045	1.19049	1.39228
TRITD3Bv1G014400	Alpha crystallin/Hsp20 domain	TraesCSU02G175200						0.000641863	0.00726899	2.82489	0.827618	0	0	0	0.566732	0.93169	0.660083
TRITD4Av1G245450	F-box domain	TraesCS4A02G423400, TraesCS7D02G061200, TraesCS2B02G146300						0.000646968	0.00730695	0.793662	0.232669	0.385119	0.642009	0.567715	1.1193	1.2199	1.18488
TRITD4Av1G149350	Clp, repeat (R) domain	TraesCS4A02G199000, TraesCS4D02G114100, TraesCS4B02G116400	AT3G52490					0.000651104	0.00733776	1.29724	0.380491	0.129991	0.146626	0.129385	0.520106	0.73148	0.366787
TRITD4Av1G156850	Alcohol dehydrogenase, zinc-type, conserved site	TraesCS4A02G202300, TraesCS4B02G106500, TraesCS4D02G103300						0.000652253	0.00734873	0.791408	0.232159	6.70994	3.41058	5.35606	8.93126	10.9402	13.7875
TRITD3Bv1G202710	Heat shock protein 70 family	TraesCS3B02G390800	AT3G12580					0.00067934	0.0075883	1.65351	0.486644	3.70245	5.38244	1.19318	10.6462	19.5802	16.9711
TRITD1Bv1G004180	Protein of unknown function DUF594	TraesCS1B02G022600, TraesCS1A02G018800						0.000709654	0.0078497	1.17803	0.347931	0.132726	0.266831	0.100877	0.540264	0.702016	0.384125
TRITD7Av1G027410	Transferase	TraesCS7A02G094300, TraesCS7D02G089800	AT1G03495, AT1G03940					0.000709724	0.0078497	0.667714	0.197211	0.810377	0.498655	0.633456	1.35317	1.23981	1.18091
TRITD3Av1G259620	F-box associated domain, type 3	TraesCS3A02G466800, TraesCSU02G185300, TraesCS3B02G505700, TraesCS7D02G391200						0.00072495	0.00796968	0.725958	0.214783	1.51569	3.14942	2.29399	4.41418	4.9822	4.59579
TRITD7Av1G237410	SAWADEE domain	TraesCS7A02G442700, TraesCS7D02G431900, TraesCS7D02G431800, TraesCS7B02G341500, TraesCS7B02G341400						0.000744478	0.00814569	0.827569	0.245376	1.012	0.578528	1.02252	2.35669	2.33285	1.39805
TRITD3Bv1G226840	G10 protein	TraesCS3B02G445500	AT4G21110					0.000747588	0.00816916	2.16302	0.64156	0.262198	0.45647	0	2.73557	3.53571	1.66825
TRITD4Av1G234300	WD40 repeat	TraesCS4A02G388400, TraesCS7D02G084500	AT3G20740					0.000765201	0.00832655	0.632367	0.18792	1.57891	1.76205	1.83527	4.69419	2.67017	2.78562
TRITD4Av1G195140	Leucine-rich repeat	TraesCS4A02G273300, TraesCS4D02G038100, TraesCS4B02G040700						0.000766637	0.00833783	0.848565	0.252206	0.588967	0.253637	0.442436	0.830961	1.0967	0.975231
TRITD1Bv1G062490	UDP-glucuronosyl/UDP-glucosyltransferase	TraesCS1B02G138700, TraesCS1D02G120100, TraesCS1A02G119300	AT1G05530, AT1G05560, AT4G14090, AT4G15550					0.000774797	0.0083981	0.679023	0.201991	0.681206	0.598823	0.815602	1.43331	1.51827	1.22662
TRITD3Av1G129580	Transferase	TraesCS3A02G205200, TraesCS3D02G210200, TraesCS3B02G237300						0.000807037	0.00867092	0.597461	0.178327	1.59057	1.45948	1.54526	2.18371	3.98058	2.5458
TRITD7Av1G041420	Exostosin, GT47 domain	TraesCS7A02G139600, TraesCS7D02G140900, TraesCS7B02G041200	AT5G25310					0.000826019	0.00883616	0.668882	0.200029	1.30274	1.48256	0.991088	1.9302	3.3457	2.2734
TRITD6Av1G129180	NPH3 domain	TraesCS6A02G208800, TraesCS6D02G192300, TraesCS6B02G237800	AT1G67900, AT3G26490					0.000829457	0.00886672	0.764723	0.228769	1.37356	2.7912	1.46495	3.72598	4.03186	3.80744
TRITD1Av1G169590	Zinc-ribbon 15	TraesCS1A02G271800, TraesCS1D02G271900, TraesCS1B02G281700	AT1G44414					0.000829514	0.00886672	0.735345	0.219982	3.39967	4.02713	3.22276	6.90004	9.59568	6.39136
TRITD7Bv1G041880	Armadillo	TraesCS7B02G100600, TraesCS7A02G194900, TraesCS7D02G196500	AT3G47820, AT5G62560, AT5G40140, AT5G65200					0.000853703	0.00906486	0.654677	0.196319	0.477761	0.57237	0.753522	1.256	1.1768	1.03622
TRITD1Bv1G201690	Transcription factor TFIIB	TraesCS1B02G386800, TraesCS1A02G368200						0.000855005	0.00907176	0.759074	0.227653	2.32343	1.66995	1.34427	3.3574	5.20335	3.0122
TRITD5Bv1G206620	Protein kinase domain	TraesCS5B02G415000, TraesCS5A02G411300	AT1G49270, AT4G34440, AT3G18810					0.00086681	0.00917367	0.664662	0.199566	1.29328	1.40822	1.1884	2.51472	2.62709	2.47564
TRITD1Bv1G016640	Signal transduction histidine kinase, phosphotransfer (Hpt) domain	TraesCS4B02G011600, TraesCSU02G197100, TraesCS4A02G302200, TraesCS4D02G009700, TraesCSU02G059800						0.000873587	0.00922432	0.791363	0.237764	4.41047	4.74177	2.49772	6.87431	10.563	8.05006
TRITD6Bv1G086480	Alpha crystallin/Hsp20 domain	TraesCS6B02G210600, TraesCS6D02G169100, TraesCS6A02G181700	AT1G52560					0.000885987	0.00932456	1.17734	0.354147	0.508727	0.357037	0.210979	0.846177	1.46166	1.24712
TRITD7Av1G114640	D-galactoside/L-rhamnose binding SUEL lectin domain	TraesCS7A02G272400, TraesCS7D02G272600, TraesCS7B02G169700	AT2G16730, AT4G35010, AT4G38590					0.000891646	0.00936992	0.657448	0.197868	0.445146	0.69253	0.554024	1.05165	1.18654	1.01876
TRITD6Av1G042160	Leucine-rich repeat-containing N-terminal, plant-type	TraesCS6A02G126700, TraesCS6B02G155000, TraesCS6D02G117200						0.000906465	0.00949216	0.861307	0.259582	0.55351	0.344024	0.722377	1.2454	1.13928	1.38647
TRITD5Av1G255690	Dirigent protein	TraesCS5A02G549300, TraesCS3B02G568700, TraesCS4B02G385500, TraesCS4D02G359300, TraesCSU02G200800						0.000912891	0.00954552	0.825351	0.248893	1.83409	1.00974	1.11596	4.17714	2.32714	2.68835
TRITD3Av1G285990	RNA recognition motif domain		AT5G59865					0.000928142	0.00966093	0.768918	0.2322	2.49335	2.03564	1.41109	3.81603	4.49327	4.46968
TRITD3Bv1G229490	Nuclear transport factor 2	TraesCS3B02G354200, TraesCS3A02G325400, TraesCS3D02G318700	AT1G11570					0.000954763	0.00989678	0.595167	0.180161	3.16993	3.88577	3.60203	6.12454	6.67388	6.73179
TRITD5Av1G055210	Late embryogenesis abundant protein, LEA_2 subgroup	TraesCS5A02G098600, TraesCS5D02G110800, TraesCS5B02G103800	AT5G53730					0.000965099	0.00997835	0.595788	0.180514	1.90993	2.38314	2.01719	3.30602	3.95861	4.34736
TRITD1Av1G163670	P-type ATPase	TraesCS1A02G258300, TraesCS1B02G268800, TraesCS1D02G257600	AT3G42640, AT2G07560					0.000976864	0.0100452	1.08368	0.328677	0.0853805	0.0853914	0.0876461	0.238799	0.392672	0.201276
TRITD5Av1G103660	Transcription factor GRAS	TraesCS5A02G135000, TraesCS5D02G139500, TraesCS5B02G133800	AT1G50420	GRAS	AT1G50420.1	1e-119	scarecrow-like 3	0.000982913	0.0100974	0.80167	0.243271	0.229435	0.457438	0.35597	0.620923	0.859227	0.82881
TRITD4Av1G084090	Integrase, catalytic core							0.000997165	0.0102061	0.7946	0.241422	0.105874	0.0975077	0.153089	0.289211	0.294481	0.214844
TRITD2Bv1G217170	SANT/Myb domain	TraesCS2B02G466500, TraesCS2D02G444300, TraesCS2A02G445500	AT3G12820, AT1G16490, AT1G79180, AT1G56160	MYB	AT1G79180.1	8e-77	myb domain protein 63	0.000998917	0.010219	0.587006	0.178376	1.04108	1.24134	1.1507	1.99504	2.18782	2.0522
TRITD2Av1G047870								0.00100921	0.0103041	0.678567	0.20638	2.4923	3.11659	3.61689	6.48057	6.07767	5.73377
TRITD3Bv1G167320	Aminotransferase class V domain	TraesCS3B02G316300, TraesCS3A02G282600, TraesCS3D02G282600						0.00101956	0.0103869	1.15203	0.350686	0.195051	0.116738	0.105094	0.358405	0.424142	0.577852
TRITD4Av1G161400	NB-ARC	TraesCS4A02G209700, TraesCS4D02G110700, TraesCS4B02G113200						0.00102723	0.0104471	0.808557	0.246289	0.387995	0.401138	0.379131	1.00559	0.903931	0.7813
TRITD2Bv1G220430	Zinc finger, RING-type	TraesCS2B02G477500, TraesCS2D02G455800, TraesCS2A02G455400	AT1G20823, AT1G76410					0.0010424	0.0105782	0.593	0.180857	2.22344	2.43516	2.38521	3.66958	5.07173	4.26777
TRITD7Av1G218760	NUDIX hydrolase domain	TraesCS7A02G406000, TraesCS7D02G399800, TraesCS7B02G305900	AT5G24460					0.00106297	0.0107426	0.624412	0.190759	1.42525	2.31128	1.89257	3.531	3.74999	3.18552
TRITD6Av1G032580	Galactose-binding-like domain superfamily	TraesCS6A02G108400, TraesCS6B02G136900, TraesCS6D02G096400	AT1G65210, AT2G22620, AT4G37950, AT4G38030					0.00108496	0.0109145	0.889276	0.272157	0.18468	0.190904	0.349662	0.623842	0.507007	0.610328
TRITD2Bv1G083310	Putative cell wall protein	TraesCS2B02G229200, TraesCS1D02G003600, TraesCS2A02G202100						0.00110456	0.0110659	0.681164	0.208789	90.6646	88.1037	51.8572	131.778	181.494	136.533
TRITD0Uv1G040730	Alpha/beta hydrolase fold-1	TraesCS5A02G202900, TraesCS5D02G209300, TraesCS5B02G201400	AT1G18360, AT1G73480					0.00111417	0.0111458	0.610968	0.187414	0.94073	0.779887	1.35297	1.50938	2.03449	2.09633
TRITD7Bv1G199710	Transcription factor CBF/NF-Y/archaeal histone domain	TraesCS7B02G376500, TraesCS3D02G102500, TraesCS7D02G462100		NF-YC	AT1G54830.3	3e-54	nuclear factor Y, subunit C3	0.00113495	0.0112974	0.647427	0.198918	3.28038	4.54855	2.65304	8.30715	5.61837	6.08934
TRITD7Bv1G115250	ABC transporter-like	TraesCS7B02G203400, TraesCS7D02G298600, TraesCS7A02G303200						0.00113618	0.0113071	0.700806	0.215339	0.272507	0.34279	0.442378	0.721751	0.634319	0.771203
TRITD5Av1G180210	Cytochrome P450	TraesCS5A02G316600, TraesCS5D02G322900, TraesCS5B02G317200	AT3G61880, AT2G46660, AT1G01190					0.0011444	0.0113672	0.587262	0.180563	0.822345	0.827826	0.797392	1.28873	2.09294	1.21468
TRITD1Av1G191340		TraesCS1A02G323800, TraesCS1D02G325100, TraesCS1B02G337100						0.00114592	0.0113741	0.687879	0.211524	1.33255	1.69784	0.945198	2.39661	3.35114	2.19357
TRITD6Av1G167890	Protein OCTOPUS-like							0.00115106	0.0114061	0.609557	0.187514	1.47301	1.37129	1.07115	2.14278	2.83445	2.30425
TRITD5Av1G155690	Protein kinase domain	TraesCS5A02G254600, TraesCS5D02G262400, TraesCS5B02G253700	AT4G26540, AT5G56040					0.0011724	0.0115626	0.914984	0.281923	0.1162	0.0919342	0.121566	0.244838	0.307722	0.294662
TRITD3Bv1G005980		TraesCS3B02G023400, TraesCS3D02G024300, TraesCS3A02G022300						0.00117339	0.0115697	0.652107	0.200941	2.48744	2.68822	1.62941	3.38325	5.24012	4.46792
TRITD3Bv1G032110	Twin-arginine translocation pathway, signal sequence	TraesCS3B02G110400, TraesCS3D02G095100, TraesCS3A02G094900						0.00118899	0.011682	0.705518	0.217651	1.79911	3.56759	2.10894	4.66429	5.55441	4.49807
TRITD4Bv1G156020		TraesCS4B02G261300, TraesCS4D02G261300, TraesCS4A02G040300						0.00120487	0.0117962	0.687352	0.212295	2.08916	2.10554	1.22013	3.64054	3.17644	3.83191
TRITD3Bv1G247800	Alpha/beta hydrolase fold-1	TraesCS3B02G493900, TraesCS3D02G447800, TraesCS3A02G455100	AT2G23620, AT4G37150, AT2G23560, AT2G23550, AT2G23590, AT2G23570, AT2G23580, AT4G37140, AT5G10300, AT2G23600, AT3G50440, AT2G23610					0.00122356	0.0119429	0.623503	0.192836	1.13673	1.98693	1.18534	2.55643	2.99767	2.35786
TRITD5Av1G219840	Glycoside hydrolase family 10 domain	TraesCS5A02G441600, TraesCS5D02G448800, TraesCS5B02G445500						0.00124563	0.0121073	0.59173	0.183299	5.94647	4.6634	3.57061	6.89825	10.106	8.54202
TRITD1Av1G103880	Cytochrome P450	TraesCS1A02G161400, TraesCS1B02G177900, TraesCS7D02G520200, TraesCS1D02G158400	AT5G23190, AT5G08250					0.00124849	0.0121323	0.72552	0.224789	0.59113	0.696299	0.471843	1.03115	1.79828	0.962581
TRITD1Av1G102690		TraesCS1A02G159800, TraesCS7B02G223600						0.00126102	0.0122284	1.04174	0.323049	1.59951	1.73013	2.28752	4.97352	4.86801	6.79524
TRITD0Uv1G055150	Pentatricopeptide repeat	TraesCS6D02G017800, TraesCSU02G089700, TraesCS6D02G017700, TraesCSU02G090205, TraesCS7D02G487500						0.00126887	0.0122873	0.603714	0.187318	0.553494	0.404936	0.539448	0.823357	1.07949	0.865094
TRITD4Av1G213700	Protein kinase domain	TraesCS4A02G335200, TraesCS5D02G536900, TraesCS5B02G550100						0.00127287	0.0123152	0.78897	0.244867	0.532067	0.868178	1.2704	1.81418	1.89297	1.96293
TRITD3Bv1G001540	Cyclophilin-type peptidyl-prolyl cis-trans isomerase domain	TraesCS3B02G008100, TraesCS3A02G005900, TraesCS3D02G004600	AT1G74070					0.00128334	0.0123912	0.665925	0.20683	0.734963	1.02093	0.85384	1.80191	1.41872	1.93442
TRITD7Av1G021520	Cytochrome P450	TraesCS7A02G077500, TraesCS7D02G073100						0.00129328	0.0124608	0.641368	0.19934	0.509324	0.713191	0.472871	0.938558	1.13661	1.15171
TRITD6Av1G189010	Major intrinsic protein	TraesCS6A02G307300, TraesCS6B02G335900, TraesCS6D02G286400						0.00131228	0.0126256	0.690204	0.214797	1.2204	1.34026	1.0181	2.73656	2.24783	2.26487
TRITD2Bv1G187460	Senescence regulator S40	TraesCS2B02G397000, TraesCS2D02G376300, TraesCS2A02G380100						0.00132219	0.0127005	0.613559	0.191073	6.04314	5.88952	3.54237	9.03817	10.8915	8.30491
TRITD4Bv1G169150	Domain of unknown function DUF304	TraesCS4B02G287400, TraesCS4A02G016700, TraesCS4D02G286200	AT1G14345					0.00137475	0.0131207	0.808822	0.252765	0.878896	1.28912	1.24696	2.23976	3.0331	2.52914
TRITD5Av1G021520	Aminoacyl-tRNA synthetase, class Ia	TraesCS5A02G048100, TraesCS5B02G053100	AT1G27160, AT1G14610					0.00139349	0.0132601	0.780249	0.244133	0.186081	0.20675	0.182275	0.368091	0.566426	0.371922
TRITD7Bv1G144170	Cytochrome P450	TraesCS7B02G254100, TraesCS7A02G373100	AT2G26710					0.00139831	0.0132939	0.842437	0.263674	0.517069	0.603302	0.329198	1.22266	0.953012	1.21465
TRITD5Av1G246150	GDSL lipase/esterase	TraesCS5A02G517200, TraesCS4D02G343600	AT5G18430					0.00140845	0.0133631	1.25639	0.393492	0.227807	0.15869	0.23099	0.994545	0.718363	0.621204
TRITD3Av1G217260	Homeobox domain	TraesCS3A02G358100, TraesCS3D02G352500, TraesCS3B02G391100		WOX	AT5G59340.1	5e-26	WUSCHEL related homeobox 2	0.00144049	0.0136049	0.593281	0.186191	1.09164	1.44102	1.28709	2.72212	2.00672	2.28052
TRITD7Av1G040300	Sulfiredoxin	TraesCS7A02G135700, TraesCS7D02G135800, TraesCS7B02G036800						0.00146871	0.0138026	0.581944	0.182955	4.70708	5.45242	4.00963	9.57529	7.65075	8.38038
TRITD4Av1G193940	Domain unknown function DUF295	TraesCS4A02G270600, TraesCS4D02G041000, TraesCS4B02G043500						0.0015016	0.0140358	0.694313	0.218725	0.739879	0.420829	0.735566	1.0036	1.52228	1.26765
TRITD2Bv1G232020	PB1 domain	TraesCS2B02G519200, TraesCS2A02G491000, TraesCS2D02G491200	AT1G19850	ARF	AT1G19850.1	0	ARF family protein	0.00152275	0.0142048	0.70903	0.223647	0.312739	0.313146	0.270983	0.483791	0.706453	0.679967
TRITD1Av1G123300		TraesCS1A02G188400, TraesCS1B02G196100, TraesCS1D02G188000						0.00152314	0.0142053	0.699878	0.220765	8.04998	4.51676	4.23097	8.96206	11.7034	12.5994
TRITD3Bv1G206100	Leucine-rich repeat domain superfamily	TraesCS3B02G396800, TraesCS3A02G364900						0.00153194	0.0142682	0.629849	0.198781	1.93055	1.46118	1.55304	2.62652	3.92968	2.89493
TRITD2Av1G267740	WRKY domain	TraesCS2A02G489500, TraesCS2D02G489700, TraesCS2B02G517400	AT2G40750, AT3G56400	WRKY	AT3G56400.1	8e-31	WRKY DNA-binding protein 70	0.00154636	0.014364	0.916692	0.289557	0.808407	0.611281	0.319436	1.13639	1.39425	1.70453
TRITD7Bv1G145920	Transferase	TraesCS7B02G257000, TraesCS7A02G370700, TraesCS7D02G352200	AT3G62160					0.0015485	0.0143775	0.585119	0.184846	2.75991	4.9115	3.44001	5.79189	7.48611	6.37628
TRITD1Bv1G044800	NB-ARC	TraesCS1B02G112200, TraesCS1A02G101700, TraesCS1D02G093300						0.00155191	0.0143996	0.82706	0.261331	0.0854629	0.0622161	0.120598	0.14327	0.268343	0.216606
TRITD6Av1G159910	AP2/ERF domain	TraesCS6A02G250900, TraesCS6D02G232700, TraesCS6B02G274500	AT4G16750, AT2G35700	ERF	AT2G44940.1	5e-51	ERF family protein	0.00157124	0.0145462	0.621922	0.196736	1.12118	1.39442	1.53045	2.68487	2.56584	2.33994
TRITD2Bv1G037800	Plant peroxidase	TraesCS2B02G124300, TraesCS2D02G107300, TraesCS2A02G106700						0.00158007	0.0146006	0.836829	0.264856	0.903649	0.435151	0.576216	1.41947	1.57475	1.37091
TRITD5Bv1G007790	Pectinesterase inhibitor domain	TraesCS5B02G021900, TraesCS5B02G022000, TraesCS5D02G030100, TraesCS5A02G024200						0.00158868	0.0146494	0.625514	0.198074	103.113	121.713	64.3772	162.36	178.085	185.911
TRITD3Bv1G243760	F-box domain	TraesCS3B02G481200, TraesCS3A02G446100						0.00159286	0.0146782	0.739286	0.234158	0.497	0.501343	0.652515	0.849375	1.05888	1.77337
TRITD4Av1G083900		TraesCS4A02G144200, TraesCS5B02G138000, TraesCS6D02G110200, TraesCS2D02G239400						0.00159707	0.0147041	0.603791	0.191289	9.81809	10.3789	12.3801	19.4883	20.0819	20.313
TRITD3Bv1G003240	Protein kinase domain	TraesCS3B02G015400, TraesCSU02G167800, TraesCS3D02G011900, TraesCS3A02G012900, TraesCS3A02G013500						0.00162481	0.0148871	0.871881	0.276663	0.738267	0.408801	0.765436	1.08381	1.52719	2.07236
TRITD2Bv1G079740	WD40 repeat		AT4G02730					0.00164281	0.015019	0.604108	0.19189	11.5004	10.3717	6.80143	14.734	21.0901	16.4797
TRITD3Bv1G023110	Leucine-rich repeat domain superfamily	TraesCS3A02G068700						0.00170085	0.0154481	0.731117	0.232986	0.764851	0.776947	0.848616	1.65226	1.69829	1.76909
TRITD7Av1G007650	F-box domain	TraesCS3D02G491100						0.00170528	0.0154849	0.885856	0.282365	0.269974	0.32543	0.384846	1.23549	0.748286	0.568753
TRITD6Bv1G179310	Major intrinsic protein	TraesCS6B02G335900, TraesCS6D02G286400, TraesCS6A02G307300						0.00172646	0.0156364	0.889167	0.283748	0.839912	0.615797	0.436327	1.53415	1.63861	1.41707
TRITD2Bv1G039820	Universal stress protein A family	TraesCS2B02G131300, TraesCS2A02G112500, TraesCS2D02G113000	AT5G49050					0.00176215	0.0158598	0.581871	0.186042	2.29428	3.10378	2.46824	4.48402	4.5853	5.08569
TRITD6Bv1G224790	NB-ARC	TraesCS6B02G457400, TraesCS6A02G411300						0.00176569	0.0158818	0.744847	0.238195	0.201272	0.12943	0.159237	0.360218	0.449783	0.255662
TRITD4Bv1G187220	Tubulin							0.00179047	0.0160385	0.750506	0.240319	1.20294	1.02721	1.65602	2.77853	2.53824	2.96294
TRITD7Av1G026960	Early nodulin 93 ENOD93 protein	TraesCS7A02G092900, TraesCS7D02G088600, TraesCSU02G258300						0.00180047	0.0161073	0.729759	0.233799	7.10784	5.14559	9.52912	10.8391	17.1351	17.4323
TRITD6Av1G199490	Glycoside hydrolase, family 5	TraesCS6A02G333500, TraesCS6B02G363900, TraesCS6D02G312600	AT1G02310					0.00181079	0.0161718	0.665716	0.213396	1.08284	1.50317	1.63059	3.83018	2.17832	2.42285
TRITD3Av1G172540	ABC transporter type 1, transmembrane domain	TraesCS3A02G258400, TraesCS3B02G291100, TraesCS3D02G258300	AT5G46540, AT4G18050					0.00181916	0.0162257	0.92514	0.296684	0.480031	0.583073	1.21185	1.58875	2.20791	1.60577
TRITD5Av1G208600		TraesCS5A02G405100, TraesCS5D02G415200						0.00182289	0.0162507	0.649144	0.208215	0.695764	0.575029	0.665965	1.06832	1.21365	1.50927
TRITD2Av1G014070	TPR and ankyrin repeat-containing protein 1	TraesCS2A02G063600, TraesCS2B02G076300, TraesCS2D02G061800						0.0018277	0.016281	0.603276	0.193551	3.17601	1.9728	2.85054	5.46809	4.29293	4.84903
TRITD1Av1G190690	GDSL lipase/esterase	TraesCS1A02G322600, TraesCS1D02G322600, TraesCS1B02G334900						0.00183852	0.0163507	0.612966	0.196769	0.731845	1.20431	1.22183	2.01608	2.23391	1.55921
TRITD7Bv1G005570	Dirigent protein	TraesCS7B02G017300						0.00185135	0.0164495	1.65583	0.531893	0.247073	0.140731	0.280212	1.00765	1.4603	1.50932
TRITD1Bv1G024670		TraesCS1B02G084100, TraesCS1A02G065900, TraesCS1D02G066900						0.00186207	0.0165307	1.69575	0.545013	0.379848	0.0809824	0.215145	1.82662	0.934247	1.22674
TRITD2Bv1G189780	Small auxin-up RNA	TraesCS2B02G403800, TraesCS2D02G383200, TraesCS2A02G386400	AT4G22620, AT4G12410					0.00197074	0.0172797	0.627752	0.202854	2.65751	2.55412	1.50688	3.62894	4.09004	4.74455
TRITD5Av1G157190	AAA+ ATPase domain	TraesCS5A02G257900, TraesCS5D02G266200, TraesCS5B02G257100						0.00203375	0.0177153	0.590268	0.191319	0.272803	0.262594	0.328161	0.521459	0.604297	0.456079
TRITD3Av1G239410	F-box domain	TraesCS3A02G417400, TraesCS3B02G452300, TraesCS3D02G412900	AT4G05497, AT4G05490, AT4G05475, AT4G03630, AT4G05470, AT4G05460, AT5G52480					0.00206097	0.0178703	0.67091	0.217736	0.533025	0.460713	0.505733	0.854354	1.11702	1.02528
TRITD6Bv1G077650	RNA polymerase I specific transcription initiation factor RRN3	TraesCS6B02G199600, TraesCS6A02G171400, TraesCS6D02G161100	AT2G39240, AT2G34750, AT1G30590					0.00206391	0.0178921	0.599943	0.194731	1.64026	1.00801	0.918117	2.42597	2.14391	1.83108
TRITD7Av1G061930	Putative S-adenosyl-L-methionine-dependent methyltransferase							0.00206492	0.0178971	0.796561	0.258562	2.70009	3.15255	2.23738	6.01045	6.04762	6.09795
TRITD7Av1G073100	Zinc finger, SWIM-type							0.00208104	0.01801	0.648608	0.210695	0.72157	0.573427	0.632482	1.38009	1.15526	1.20405
TRITD3Av1G001510		TraesCS3D02G022100, TraesCS3A02G024200, TraesCS3B02G020700						0.00208191	0.0180107	0.599107	0.194623	1.3168	2.05528	1.46326	3.11221	3.58627	2.21994
TRITD6Bv1G056680	Lipoxygenase	TraesCS6B02G160400, TraesCS6D02G121900, TraesCS6D02G122000, TraesCS6A02G132500, TraesCS6A02G132200	AT3G22400, AT1G55020					0.00209958	0.018129	0.792234	0.257572	0.214321	0.217489	0.136964	0.627974	0.309846	0.378206
TRITD5Av1G182270	UDP-glucuronosyl/UDP-glucosyltransferase	TraesCS5A02G320000						0.00213083	0.0183274	0.87332	0.284343	0.2227	0.368047	0.228498	0.699307	0.795073	0.509559
TRITD5Bv1G162200	NB-ARC	TraesCS5B02G292400, TraesCS5D02G300500, TraesCS5A02G293300						0.00214015	0.0183886	2.0119	0.65533	0.12991	0.0279419	0	0.396742	0.386067	0.246453
TRITD5Bv1G214940	Bifunctional inhibitor/plant lipid transfer protein/seed storage helical domain	TraesCS5B02G436600, TraesCS5A02G433400, TraesCS5D02G441600						0.00214245	0.0184008	0.978675	0.318814	0.549422	0.881839	0.467889	1.61994	1.6918	1.76564
TRITD3Av1G152380	NAD-dependent epimerase/dehydratase	TraesCS3A02G229700, TraesCS3D02G223500, TraesCS3B02G259000	AT5G14700					0.00214737	0.0184279	0.58346	0.190111	2.38868	1.89018	1.33554	3.45841	2.78566	3.70589
TRITD7Bv1G076440	Domain of unknown function DUF1618	TraesCS7B02G157700						0.00214999	0.0184321	1.03188	0.33626	0.268512	0.323675	0.152997	0.796448	0.425845	0.990298
TRITD1Bv1G165730	Domain of unknown function DUF1618	TraesCS1B02G301800, TraesCS1A02G292400, TraesCS1D02G290800						0.00216328	0.0184997	1.15455	0.376461	0.332585	0.103587	0.262365	0.770939	0.926021	0.482848
TRITD5Av1G191040	Peptidase S1, PA clan	TraesCS5B02G351500, TraesCS5B02G256800, TraesCS6B02G345200						0.00216569	0.0185127	1.17453	0.383017	0.125658	0.0719351	0.215049	0.567904	0.417166	0.340307
TRITD2Av1G219940		TraesCS2A02G367000, TraesCS2D02G363900	AT1G04530					0.00223561	0.0189858	0.618726	0.202396	1.33189	1.56344	1.70619	3.23031	2.81077	2.64341
TRITD4Av1G128610								0.00239106	0.0200246	0.868498	0.285991	1.00879	1.62394	0.806029	2.45624	2.37853	3.34943
TRITD6Bv1G156020	Pentatricopeptide repeat	TraesCS6B02G294200, TraesCS6A02G266800, TraesCS6D02G247900, TraesCSU02G123205	AT1G31920					0.002401	0.0200756	0.609991	0.200949	0.754579	0.928995	0.825941	1.17988	1.61907	1.96166
TRITD4Bv1G009640	Lysine-tRNA ligase, class II	TraesCS4B02G034500, TraesCS4A02G278500, TraesCS4D02G032900						0.00245253	0.0204001	0.707172	0.233457	0.399495	0.519999	0.851441	0.995237	1.14723	1.35184
TRITD1Av1G025030	Glycoside hydrolase family 9	TraesCS1A02G072300, TraesCS1D02G074900, TraesCS1D02G075100	AT2G44560, AT2G44570, AT2G44540, AT2G44550					0.00252777	0.0209257	1.18524	0.392462	0.361289	0.333737	0.126417	0.644103	0.753682	1.31785
TRITD7Bv1G064610		TraesCS7B02G139300, TraesCS7A02G251800, TraesCS7D02G249800						0.00253111	0.0209368	0.629856	0.208589	9.42146	9.65625	5.14172	14.145	15.2341	14.6847
TRITD5Bv1G132860	Methyladenine glycosylase	TraesCS5B02G223100, TraesCS5D02G231700, TraesCS5A02G224300	AT5G57970					0.00257408	0.0212459	0.688348	0.228346	0.573185	0.455752	0.590962	0.979211	1.13624	1.15463
TRITD1Bv1G035120	F-box domain	TraesCS1B02G094000, TraesCS1A02G075300, TraesCS1A02G075400, TraesCS5D02G230400						0.00259882	0.0214161	0.877692	0.291438	0.391273	0.705268	0.336311	1.6097	0.940437	0.903519
TRITD5Bv1G162190	Leucine-rich repeat domain superfamily	TraesCS6D02G388800, TraesCS6D02G404200, TraesCS4A02G494300, TraesCSU02G194100, TraesCS7A02G006300, TraesCSU02G103100, TraesCSU02G103200, TraesCS7A02G004500, TraesCS4A02G487200, TraesCS4A02G493400, TraesCSU02G022300, TraesCS4A02G491000, TraesCS4A02G490500, TraesCS7A02G007300, TraesCS7A02G005900, TraesCS4A02G487400, TraesCS7A02G007882						0.00260064	0.0214269	2.21139	0.734346	0	0.0339658	0	0.171858	0.117279	0.128344
TRITD1Bv1G040520		TraesCS1B02G102500, TraesCS1A02G085400						0.0026242	0.0215571	0.674285	0.224116	2.27679	2.12306	2.57585	4.45679	4.90049	4.54568
TRITD1Av1G200370	Phytocyanin domain	TraesCS1A02G348000, TraesCS1B02G362600, TraesCS1D02G350900						0.00264017	0.0216584	0.640267	0.21294	74.9216	89.3202	48.6905	108.32	158.019	132.362
TRITD4Bv1G183350	Zinc finger, RING-type	TraesCS4B02G322200, TraesCS4D02G318800, TraesCS5A02G494500	AT4G35480, AT2G17450					0.00264345	0.0216761	0.663961	0.220848	1.15319	1.50837	1.10342	2.01442	3.11648	2.36113
TRITD3Bv1G052650		TraesCS3B02G146300, TraesCS3D02G128300						0.00269885	0.0219927	0.599558	0.199846	4.55641	3.14695	3.48136	6.67593	7.74868	6.08099
TRITD2Av1G037320								0.00271147	0.0220671	0.611011	0.203759	5.10192	4.06366	3.32025	6.75562	10.5835	6.28337
TRITD1Bv1G051070	Aromatic amino acid lyase	TraesCS1B02G122800, TraesCS1D02G103500, TraesCS1A02G094900	AT5G04230, AT3G53260, AT3G10340, AT2G37040					0.0027469	0.0222669	0.651255	0.217467	0.658066	0.623207	0.496148	0.784707	1.20793	1.56747
TRITD1Bv1G008590	NAD-dependent epimerase/dehydratase	TraesCS1A02G042200, TraesCS7B02G228100	AT1G08200, AT2G27860					0.00275713	0.022328	0.657205	0.219537	0.453103	0.358022	0.581296	1.202	0.89903	0.655902
TRITD2Av1G262080	Transferase	TraesCS2A02G471300, TraesCS2D02G471000, TraesCS2B02G494100						0.00278202	0.0224598	0.694525	0.232216	0.399353	0.408434	0.65431	1.17575	0.940324	0.820306
TRITD1Av1G009210	Ankyrin repeat	TraesCS4D02G096800, TraesCS1D02G042500, TraesCS1B02G053900						0.0027833	0.0224657	0.726616	0.242958	1.56599	1.67966	0.845663	2.44663	2.461	3.3939
TRITD2Bv1G025510	Tapetum determinant 1	TraesCS2B02G096400, TraesCS2A02G082300, TraesCS2D02G080200						0.00278871	0.0224939	1.88364	0.629955	0.0711404	0.243506	0	0.435072	0.841938	0.691076
TRITD2Bv1G159950	UDP-glucuronosyl/UDP-glucosyltransferase	TraesCS2B02G337500, TraesCS2A02G319200, TraesCS2D02G317000						0.00279302	0.0225181	0.780896	0.2612	0.462798	0.435645	0.980816	1.43622	1.17701	1.27962
TRITD6Bv1G162740		TraesCS6B02G305300, TraesCS6D02G257900, TraesCS6A02G277300						0.00282853	0.022734	0.622648	0.208538	1.3133	1.545	0.971962	2.36293	2.23139	2.53219
TRITD7Bv1G226380	Protein of unknown function DUF677	TraesCS7B02G464400, TraesCS7A02G542500, TraesCS7D02G527700	AT1G20180					0.00283391	0.0227553	1.0967	0.36738	0.132463	0.182496	0.21188	0.485349	0.892872	0.373602
TRITD3Bv1G058400	Phytocyanin domain	TraesCS3B02G157900, TraesCS3D02G140400, TraesCS3A02G314000						0.00287385	0.0230272	0.671834	0.225378	9.22262	15.6685	17.8826	32.8425	24.0638	25.028
TRITD3Av1G019880	Protein kinase domain	TraesCS3D02G072100						0.00288407	0.0230959	0.86103	0.288953	0.167465	0.194534	0.283773	0.49391	0.531379	0.522538
TRITD7Bv1G197470	Small auxin-up RNA	TraesCS7B02G370300, TraesCS7A02G468600, TraesCS7D02G456200	AT1G79130, AT1G56150, AT1G16510, AT3G12830					0.00290033	0.0231815	0.674309	0.226422	4.36217	3.22021	2.35571	5.54585	8.57498	5.50059
TRITD7Av1G003200	Transcription factor GRAS	TraesCS7A02G014200, TraesCS7D02G011400	AT3G60630, AT2G45160, AT4G00150	GRAS	AT4G00150.1	9e-54	GRAS family protein	0.00290336	0.0231969	0.616761	0.207121	1.82312	2.60364	1.45024	2.96675	4.44748	3.44268
TRITD7Bv1G091590	DNA helicase							0.00310061	0.024385	1.04424	0.353073	0.70656	1.21961	2.36761	4.63674	3.36872	3.32826
TRITD7Bv1G214350	Methyladenine glycosylase	TraesCS7B02G416200, TraesCS7A02G508000, TraesCS7D02G496200	AT5G57970					0.00310683	0.0244201	0.663554	0.224404	0.626052	0.656197	0.620363	1.0686	1.5648	1.18099
TRITD4Bv1G208040	Pyridoxal phosphate-dependent decarboxylase	TraesCS7D02G538800						0.00317824	0.0248456	0.86555	0.293412	1.68521	1.54939	1.4252	4.42162	4.12669	3.00941
TRITD4Bv1G154600	Glycoside hydrolase family 10 domain	TraesCS4B02G259100, TraesCS4D02G259500, TraesCS4A02G045500	AT4G33830, AT4G33860, AT4G33840					0.00323232	0.0251834	0.619658	0.210429	0.497144	0.561448	0.551138	1.04189	1.07133	0.920771
TRITD1Av1G008040	Aromatic amino acid lyase	TraesCS1A02G037700, TraesCS1B02G048200, TraesCS1B02G048100, TraesCS1D02G039300	AT5G04230, AT3G53260, AT3G10340, AT2G37040					0.00326042	0.0253623	1.43402	0.487422	0.077403	0.103306	0.0397157	0.273901	0.338119	0.339223
TRITD5Bv1G169450		TraesCS5B02G316900, TraesCS5D02G322600, TraesCS5A02G316400						0.00333149	0.0257445	0.920622	0.31363	0.329971	0.35411	0.613334	0.983297	1.56282	0.829986
TRITD7Av1G201790	Protein kinase domain	TraesCS7A02G374200, TraesCS7D02G349100, TraesCS7B02G253200						0.0033724	0.0260219	0.894645	0.305175	0.260546	0.106897	0.133254	0.53067	0.300694	0.376123
TRITD4Av1G066050	Bifunctional inhibitor/plant lipid transfer protein/seed storage helical domain	TraesCS4A02G129300, TraesCS4D02G177100, TraesCS4B02G175200						0.00341187	0.0262472	0.836655	0.285746	0.622167	0.74629	0.636161	1.41294	2.21132	1.2772
TRITD2Bv1G051840	Terpene synthase, N-terminal domain	TraesCS2B02G159800, TraesCS2D02G138400, TraesCS2A02G135900	AT5G23960					0.00342446	0.0263068	0.788667	0.269462	0.677016	0.71429	0.623588	1.29115	1.33975	1.99883
TRITD1Av1G021590		TraesCS1A02G065900, TraesCS1D02G066900, TraesCS1B02G084100						0.00344147	0.0264082	1.6656	0.569382	0.0949619	0.323929	0.322717	1.41148	1.30795	1.4312
TRITD3Av1G172030		TraesCS3A02G257200, TraesCS3D02G257200, TraesCS3B02G290100						0.00344069	0.0264082	0.612348	0.209325	1.69321	2.88809	2.34434	4.02967	4.6274	4.051
TRITD3Av1G261400	SANT/Myb domain	TraesCS3A02G473600, TraesCS3B02G517000	AT3G62670	ARR-B	AT4G31920.1	3e-80	response regulator 10	0.00344758	0.0264502	1.09498	0.374387	2.81174	2.34076	0.876505	5.09464	6.59969	4.72596
TRITD5Av1G218040	Ankyrin repeat	TraesCS5A02G436200, TraesCS5B02G439300, TraesCS5D02G443900						0.00345341	0.0264755	0.621921	0.212681	0.35723	0.410935	0.434819	0.754583	0.850683	0.671951
TRITD2Bv1G246090	Pre-mRNA-processing-splicing factor 8		AT1G80070, AT4G38780					0.00346466	0.026552	0.678963	0.232268	1.17133	1.00318	1.55542	2.38748	2.0551	3.02227
TRITD4Bv1G031570	Alpha crystallin/Hsp20 domain	TraesCS4B02G089800, TraesCS4A02G226700, TraesCS4D02G086200						0.00346622	0.0265591	1.72108	0.588795	0.133223	0.108639	0.144065	0.830824	1.12671	0.685009
TRITD7Av1G179530								0.00354067	0.0269956	0.610446	0.209313	3.44192	1.94119	3.08753	6.17912	5.252	4.07402
TRITD7Av1G077820	BAG family molecular chaperone regulator 5/6/7/8	TraesCS5A02G047200						0.00358884	0.027293	0.582667	0.200078	4.32658	4.45281	3.55269	6.71897	9.06275	6.7441
TRITD5Av1G022450		TraesCS5A02G050800						0.00359854	0.0273457	0.684075	0.234967	1.12697	1.71648	0.853539	1.96875	2.84328	2.43512
TRITD7Av1G036790	Xyloglucan fucosyltransferase	TraesCS7A02G124400, TraesCS7D02G122100, TraesCS7B02G023400						0.00368278	0.0278247	0.967455	0.333131	0.210696	0.428146	0.149244	0.564372	0.865888	0.554039
TRITD7Bv1G042000	FBD domain	TraesCS7B02G101200, TraesCS7D02G197000						0.00369766	0.0279219	0.653003	0.224951	0.783614	0.931644	0.484062	1.46595	1.29151	1.39145
TRITD5Av1G145100	EF-hand domain	TraesCS5A02G229000, TraesCS5D02G238700, TraesCS5B02G227700						0.00381378	0.0285669	0.683666	0.236303	1.35846	1.16177	1.3703	2.04431	2.23187	3.90819
TRITD7Bv1G030310	Xyloglucan fucosyltransferase	TraesCS7B02G076100, TraesCS7A02G171000, TraesCS7D02G171800						0.00390899	0.0291328	1.25548	0.435111	0.158379	0.0779708	0.0633842	0.414447	0.269245	0.392864
TRITD0Uv1G018010	Staygreen protein	TraesCSU02G162400, TraesCS2A02G560500, TraesCS2D02G569700	AT1G44000					0.00392619	0.0292138	0.695873	0.241285	1.47573	2.8908	1.82813	3.06039	4.69382	4.53976
TRITD5Bv1G125940	Cytochrome P450	TraesCS5B02G206000, TraesCS5A02G207700						0.00398169	0.0295319	0.876226	0.304286	0.163817	0.304205	0.314858	0.519746	0.700582	0.666833
TRITD3Bv1G210330		TraesCS3B02G406300, TraesCS3D02G366800, TraesCS3A02G374100						0.00405807	0.0299652	0.645678	0.224692	0.711719	1.066	1.3028	1.95479	2.20018	1.67452
TRITD7Av1G070430	GDSL lipase/esterase	TraesCS7A02G204900, TraesCS7D02G207900, TraesCS7B02G112100	AT5G37690					0.0041438	0.0304258	1.54042	0.537293	0.0674153	0.116164	0.0256183	0.235216	0.35656	0.499241
TRITD5Bv1G141210	Alpha crystallin/Hsp20 domain	TraesCS5B02G245700						0.00425462	0.0309993	2.53336	0.886212	0.738574	0	0.418374	3.47142	3.82531	2.38662
TRITD7Av1G021840	DJ-1/PfpI	TraesCS7A02G078400	AT4G34020					0.00427399	0.0311024	0.719186	0.25171	0.439148	0.615882	0.98537	1.12755	1.42486	1.54493
TRITD6Av1G155510	Transferase	TraesCS6A02G242600, TraesCS6B02G281900, TraesCS6D02G224600	AT5G02890					0.00429089	0.031171	0.611225	0.214018	0.783969	0.959406	0.943258	1.75777	1.98819	1.3312
TRITD7Av1G089280		TraesCS7A02G242500, TraesCS5B02G133100						0.00431958	0.0313139	0.865673	0.303337	1.28043	1.5253	1.15306	3.01214	3.16147	3.44323
TRITD4Av1G201760	TATA-box binding protein	TraesCS4A02G298000, TraesCS4D02G014000	AT1G55520, AT3G13445					0.00434193	0.0314113	0.676911	0.23733	1.35147	0.83048	1.53433	2.59423	2.61147	2.06169
TRITD2Av1G202010	Heavy metal-associated isoprenylated plant protein 47	TraesCS2A02G332400, TraesCS2D02G330500						0.00436731	0.0315339	0.750046	0.263143	2.4659	2.87285	3.32946	4.88653	4.78155	10.1478
TRITD3Av1G278490	RNA polymerase, alpha subunit	TraesCS3A02G513100, TraesCS3D02G522400, TraesCS3B02G581800						0.00439314	0.0316783	0.584429	0.205174	0.376751	0.189956	0.270029	0.540247	0.432524	0.494009
TRITD3Av1G209350	Protein kinase domain	TraesCS3A02G340000, TraesCS3B02G371600, TraesCS3D02G333500	AT1G79620					0.0044806	0.0321349	0.67523	0.237575	0.192414	0.243386	0.180821	0.384147	0.559497	0.315661
TRITD2Bv1G231460	WRKY domain	TraesCS2B02G517400, TraesCS2A02G489500, TraesCS2D02G489700	AT2G40750, AT3G56400	WRKY	AT3G56400.1	2e-29	WRKY DNA-binding protein 70	0.00448943	0.0321816	0.985559	0.346838	0.468792	0.213065	0.270534	0.640348	1.05305	0.889996
TRITD2Bv1G000600		TraesCS2B02G022200, TraesCS5A02G083400						0.00451355	0.0323045	0.644905	0.227092	9.27442	7.51265	7.93349	14.0081	18.5589	15.296
TRITD4Av1G169790		TraesCS4A02G215100, TraesCS4B02G101000, TraesCS4D02G097600						0.00455534	0.0325255	1.11138	0.391759	0.139647	0.334273	0.344402	0.737496	0.941058	0.795791
TRITD2Bv1G258960	Leucine-rich repeat domain superfamily	TraesCS2D02G595200						0.00455494	0.0325255	0.582696	0.205396	0.488075	0.40454	0.599409	1.14605	0.819442	0.75409
TRITD7Av1G226760	NB-ARC	TraesCS7A02G419800, TraesCS7B02G320700, TraesCS7D02G412600, TraesCS7B02G320600						0.00458047	0.032649	0.620615	0.2189	0.5053	0.294063	0.621208	0.831916	0.823928	0.898551
TRITD1Bv1G091200		TraesCS1B02G162000, TraesCS1A02G144700, TraesCS1D02G143800						0.00461839	0.0328239	0.886319	0.312909	2.54042	2.61473	1.18556	4.73266	3.67513	6.84287
TRITD2Bv1G054460	Lipase, GDXG, putative histidine active site	TraesCS2A02G143300, TraesCS2D02G146600	AT5G23530					0.00465848	0.0330356	1.07109	0.378513	0.339469	0.371799	0.140626	0.834725	0.794982	0.769604
TRITD3Bv1G005160	Zinc finger, RING-CH-type	TraesCS3B02G019200, TraesCS3D02G019900, TraesCS3A02G025800	AT2G01275, AT5G38070					0.00472838	0.0334379	0.596758	0.211243	1.03381	1.17934	1.16868	2.48858	2.35627	1.52422
TRITD2Bv1G256550	Zinc finger, Dof-type	TraesCS2B02G592900, TraesCS2A02G590800, TraesCS2D02G563400	AT5G66940, AT3G50410	Dof	AT5G66940.1	2e-30	Dof family protein	0.0047436	0.0335148	0.680054	0.240817	1.48198	1.49243	0.747219	2.36814	2.6759	2.1289
TRITD3Av1G259990								0.00490155	0.0343298	1.3778	0.489722	0.453174	0.541374	0.102698	1.26759	1.24879	1.56178
TRITD2Bv1G194900	P-loop containing nucleoside triphosphate hydrolase	TraesCS2B02G412200, TraesCS2A02G394300, TraesCS2D02G392100						0.00490353	0.0343298	0.625552	0.222355	0.2458	0.282709	0.280432	0.595383	0.559966	0.400097
TRITD4Av1G224510		TraesCS4A02G365100, TraesCS5B02G230700						0.0049497	0.0345716	1.14802	0.408504	1.43243	1.28351	2.16419	6.01831	4.95203	4.66459
TRITD2Av1G232280		TraesCS2A02G393800, TraesCS2D02G391700, TraesCS2B02G411800						0.00496231	0.0346481	0.686536	0.244365	1.27537	1.62123	1.44685	2.64625	3.19545	2.95387
TRITD5Bv1G225180	Aromatic amino acid lyase	TraesCS5B02G468300, TraesCS1D02G039400	AT5G04230, AT3G53260, AT3G10340, AT2G37040					0.00502416	0.0349512	0.882773	0.31466	0.237654	0.143943	0.207528	0.323085	0.406017	0.832869
TRITD6Bv1G026500		TraesCS6B02G099000, TraesCSU02G123200						0.00512905	0.0355042	0.61112	0.21835	1.26778	0.962685	0.942848	1.61769	1.73565	2.69083
TRITD6Bv1G017180	Cytochrome P450	TraesCS6B02G074100, TraesCS2D02G238500, TraesCS6D02G057800, TraesCS6A02G058400	AT2G45580, AT2G45560, AT2G45570, AT1G33720, AT2G45550, AT1G33730, AT3G61040					0.0051962	0.0358727	1.09793	0.392875	0.161813	0.139454	0.0922529	0.388115	0.52165	0.329346
TRITD1Bv1G004440	Peptidase S10, serine carboxypeptidase	TraesCS1B02G023800						0.00532522	0.0365216	0.730536	0.262153	0.355604	0.544423	0.513446	1.25934	1.21229	0.61739
TRITD2Av1G260300								0.00537518	0.0367916	0.78233	0.281045	1.40665	2.15452	1.1695	3.25968	4.40348	2.79725
TRITD2Bv1G231800	Cytochrome P450	TraesCS2B02G518400, TraesCS2D02G490500, TraesCS2A02G490100						0.00541422	0.036992	0.642867	0.231139	0.305894	0.492092	0.441798	0.853765	0.566386	0.996146
TRITD6Bv1G002790	BURP domain	TraesCS6B02G015900, TraesCS7A02G552800	AT5G25610					0.00549297	0.037402	0.722509	0.260213	0.612251	0.681338	0.369084	0.880014	1.35517	1.20984
TRITD7Av1G213000	Protein of unknown function DUF597	TraesCS7A02G394800, TraesCS7D02G390300, TraesCS7B02G296800	AT1G76590, AT1G43000, AT1G21000					0.00554359	0.0376293	1.10842	0.39963	0.59216	0.183398	0.324261	0.751451	1.70594	0.964565
TRITD4Av1G012250		TraesCS4A02G035600, TraesCS4D02G267700, TraesCS4B02G268300						0.00568673	0.0382645	0.827705	0.299316	1.57516	2.11815	0.888675	2.98406	3.60237	3.65977
TRITD1Bv1G082530	Protein of unknown function DUF677	TraesCS1B02G153000	AT3G19250, AT3G19330					0.00571179	0.0383712	0.591803	0.21412	1.54745	1.55532	1.68089	3.17375	3.1864	2.47014
TRITD4Av1G202060	EF-hand domain	TraesCS4A02G298900, TraesCS4D02G012700, TraesCS4B02G014500	AT5G55630					0.00575082	0.0385837	1.16696	0.422558	0.124216	0.160336	0.141504	0.596099	0.30767	0.639726
TRITD5Bv1G211250	Transcription termination factor, mitochondrial/chloroplastic	TraesCS5B02G425900, TraesCS5D02G432100, TraesCS5A02G423600	AT2G34620					0.00576903	0.0386748	0.681447	0.246845	1.85667	2.46258	1.29554	3.431	4.90954	2.80303
TRITD4Av1G082490	Phosphatidylinositol-4-phosphate 5-kinase, core	TraesCS4A02G143600, TraesCS4D02G161800, TraesCS4B02G157800	AT2G41210, AT3G56960					0.00578813	0.0387536	0.685255	0.248321	0.290913	0.461189	0.653277	0.762455	0.909973	1.03594
TRITD1Bv1G179100	SPEAR family	TraesCS1B02G334000, TraesCS1A02G321600, TraesCS1D02G321700						0.00584586	0.0390521	0.800075	0.290271	0.502965	0.277012	0.408027	1.19539	0.921325	0.624419
TRITD1Bv1G202180	Chlorophyll A-B binding protein, plant	TraesCS1B02G388200, TraesCSU02G167700	AT1G29910, AT2G34420, AT1G29930, AT2G34430, AT1G29920					0.00585478	0.0390988	0.881033	0.319701	0.407251	0.672231	0.634924	1.18221	1.52597	1.4951
TRITD5Av1G110710	Cytochrome P450	TraesCS5A02G145700, TraesCS5B02G144600, TraesCS5D02G146500						0.00585609	0.0391009	0.765816	0.277899	0.577524	0.692376	1.2009	1.47854	1.78352	1.9489
TRITD6Av1G168200		TraesCS6A02G264000, TraesCS6B02G291000, TraesCS6D02G250900						0.00592465	0.0393963	0.587334	0.213427	0.935858	1.46673	1.6049	1.99356	2.51076	2.68131
TRITD1Av1G217940	Ubiquitin-like domain	TraesCS1D02G427100						0.0059346	0.0394234	1.65329	0.600896	0.039141	0.0336436	0.178228	0.649058	0.309939	0.381579
TRITD2Bv1G181180		TraesCS2B02G381100, TraesCS2D02G360500, TraesCS2A02G363200						0.00601506	0.0398338	0.984184	0.358281	2.40461	3.44551	1.88383	8.00426	6.56246	6.54197
TRITD2Bv1G124720		TraesCS2B02G269500						0.0060279	0.0398832	1.03594	0.37722	1.42014	0.749465	1.39321	3.40905	2.76988	4.17069
TRITD6Bv1G225490	Protein of unknown function DUF594	TraesCS6A02G414600, TraesCS6D02G399900						0.00605541	0.0400278	0.691988	0.252112	0.284003	0.200464	0.176748	0.32644	0.563876	0.462809
TRITD1Av1G129180	WRKY domain	TraesCS1A02G197400, TraesCS1B02G212000, TraesCS1D02G200900	AT1G30650	WRKY	AT2G34830.1	2e-59	WRKY DNA-binding protein 35	0.00607446	0.0401224	0.739838	0.269646	0.569968	1.15538	1.16898	1.80118	1.78583	2.38188
TRITD4Av1G002170	Pentatricopeptide repeat	TraesCS4A02G007000, TraesCS4D02G296800, TraesCS4B02G298000	AT3G04760, AT1G09900, AT1G79080					0.00609252	0.040204	0.689086	0.251238	0.254199	0.419423	0.357467	0.646278	0.691707	0.713646
TRITD6Bv1G039640		TraesCS6B02G123900, TraesCS6A02G095800, TraesCS6D02G086500						0.00614343	0.0404434	0.826326	0.301576	0.691566	0.532757	1.02078	2.05414	1.53933	1.56789
TRITD5Av1G009990	RmlC-like cupin domain superfamily							0.00617906	0.040609	2.26758	0.828151	0.303971	0	0.173098	0.963141	1.09536	1.12836
TRITD5Av1G000470	Carotenoid oxygenase	TraesCS5A02G002400, TraesCS5D02G002800, TraesCS5B02G001800	AT3G63520					0.00633749	0.0413618	0.928417	0.340106	0.158956	0.200616	0.132707	0.402069	0.571665	0.336909
TRITD2Bv1G043380	Leucine-rich repeat domain superfamily	TraesCS2B02G142800, TraesCS2D02G124100, TraesCS2D02G123500, TraesCS2A02G121600, TraesCS2A02G121500, TraesCSU02G248900, TraesCSU02G192600						0.00648325	0.0421088	0.660419	0.242598	0.680705	0.573377	0.302879	0.969443	0.932552	1.00298
TRITD5Av1G187210		TraesCS5A02G336300						0.00653496	0.0423523	0.695229	0.255631	1.97658	2.39243	1.12085	4.46243	2.9206	3.46255
TRITD5Bv1G166580	Peptidase S10, serine carboxypeptidase	TraesCS5B02G307600, TraesCS5D02G314100, TraesCS5A02G307200						0.00662383	0.0428417	0.974965	0.359078	0.131935	0.154084	0.229652	0.439561	0.473297	0.48335
TRITD7Av1G002080	F-box-like domain superfamily	TraesCS5D02G562500, TraesCS7B02G001200, TraesCS5B02G571500						0.00673304	0.0433865	1.38709	0.511887	0.698424	0.142368	0.721751	1.38794	1.93672	2.02508
TRITD6Av1G219990	Protein of unknown function DUF3615	TraesCS6A02G392200, TraesCS6B02G432400						0.00677472	0.0436079	1.13848	0.420456	0.273679	0.11091	0.0867212	0.424286	0.742678	0.297249
TRITD7Av1G177140	SANT/Myb domain	TraesCS7A02G333200, TraesCS7B02G244200, TraesCS7D02G340300	AT5G14340, AT5G12870	MYB	AT1G09540.1	5e-79	myb domain protein 61	0.00681582	0.0438116	1.2257	0.453006	0.370276	0.39456	0.130765	0.974666	1.13649	0.894271
TRITD4Av1G011080	Phytocyanin domain	TraesCS4A02G033500, TraesCS4D02G271100, TraesCS4B02G271900						0.0068781	0.0441439	0.687882	0.254518	4.05824	3.15586	2.38807	4.70633	5.67445	9.31538
TRITD1Av1G221510	Amidase signature domain	TraesCS1A02G417900, TraesCS1D02G425500, TraesCS1B02G448000	AT4G34880					0.00690522	0.0442499	0.711	0.263199	0.50992	0.439342	0.303305	0.599487	1.27524	0.794024
TRITD3Av1G257450	Protein kinase domain	TraesCS3A02G460900, TraesCS3D02G454200, TraesCS3B02G501900	AT3G21450					0.00691681	0.0442969	1.58161	0.585602	0.0615303	0.0513641	0.0679923	0.312417	0.532221	0.25886
TRITD6Av1G026110		TraesCS6A02G095800, TraesCS6D02G086500, TraesCS6B02G123900						0.00692995	0.0443724	0.817193	0.302643	0.760722	1.1839	1.25635	2.2958	3.91828	1.56789
TRITD2Av1G197020	Sugar/inositol transporter	TraesCS2A02G341400, TraesCS2D02G319100, TraesCS2B02G339100						0.00703064	0.0448468	0.62677	0.232534	0.850694	1.32333	0.630441	1.4801	2.01582	1.62432
TRITD7Bv1G036600								0.0070718	0.045068	0.714526	0.265283	3.81837	3.03248	3.40479	8.6181	5.7484	7.24901
TRITD6Av1G218620	Glutathione S-transferase, N-terminal	TraesCS6A02G385800, TraesCS6D02G370500, TraesCS6B02G424900	AT5G44000					0.00714893	0.0454138	0.886722	0.329658	0.175135	0.502912	0.208792	0.650744	0.569239	0.800576
TRITD1Bv1G033770	Protein of unknown function DUF3615	TraesCS1B02G095500, TraesCS1A02G077400						0.00725178	0.0459063	0.973838	0.362688	0.62197	0.387866	1.41394	1.97513	2.01091	1.77274
TRITD4Av1G249850	Proton-dependent oligopeptide transporter family	TraesCS4A02G440700, TraesCS7D02G049400	AT3G45650, AT3G45710, AT3G45680, AT3G45690, AT3G45700, AT3G45660, AT3G45720					0.00733399	0.0462792	0.866572	0.323193	0.123863	0.266967	0.176598	0.507056	0.392968	0.447137
TRITD2Bv1G066780	Protein kinase domain	TraesCS2B02G197000, TraesCS2D02G178100, TraesCS2A02G170600	AT2G26290, AT2G05940, AT5G35580, AT1G72540					0.0073466	0.0463307	1.03693	0.386811	0.194299	0.130489	0.110735	0.317795	0.529776	0.447996
TRITD5Bv1G184210	Reverse transcriptase zinc-binding domain	TraesCS4B02G203600, TraesCS1B02G015400, TraesCS6B02G038600, TraesCS4D02G165000						0.00736138	0.0463966	0.877682	0.327488	0.487495	0.655674	0.790698	1.82523	1.5113	1.42845
TRITD6Bv1G009410	Major pollen allergen Lol pI	TraesCS6B02G046000, TraesCS6B02G046100, TraesCS6B02G046300, TraesCS6B02G046200	AT2G45110, AT1G65681, AT3G60570					0.00735975	0.0463966	0.605744	0.226014	0.919968	1.3547	1.94414	2.90626	2.25364	2.37142
TRITD3Av1G073440	HAD-superfamily hydrolase, subfamily IG, 5'-nucleotidase	TraesCS3A02G165000, TraesCS3B02G200700, TraesCS3D02G176600	AT5G48960					0.0074407	0.0467406	0.664346	0.248219	0.569566	0.458811	0.81807	0.99599	1.72874	0.952945
TRITD2Av1G238480	Helix-loop-helix DNA-binding domain superfamily	TraesCS2A02G403700, TraesCS2B02G421700, TraesCS2D02G400800	AT1G31050					0.00747105	0.0468845	0.811484	0.303349	0.39001	0.297977	0.229882	0.835613	0.714527	0.559971
TRITD3Av1G244670	D-isomer specific 2-hydroxyacid dehydrogenase, NAD-binding domain		AT1G72190					0.00765128	0.0476539	0.645881	0.242168	1.00983	0.915832	1.16509	1.51908	2.02334	2.57051
TRITD5Av1G017260		TraesCS5A02G040400, TraesCS5B02G041400, TraesCS5D02G047300						0.00768564	0.0478322	1.03841	0.389564	0.831116	0.442531	0.940726	2.81659	2.24663	1.45265
TRITD2Bv1G206830	Small auxin-up RNA	TraesCS2B02G437000, TraesCS2D02G415500	AT1G79130, AT1G56150, AT1G16510, AT3G12830					0.00773906	0.0480785	1.11749	0.419595	0.561738	1.87754	2.178	4.05315	5.22714	3.6113
TRITD3Bv1G268810	RNA recognition motif domain	TraesCS3B02G562300, TraesCS3A02G499100, TraesCS3D02G505900						0.007804	0.0483883	0.663841	0.249523	0.827744	1.03204	0.630214	1.52246	2.09317	1.30165
TRITD2Bv1G205060		TraesCS2B02G434700, TraesCS2D02G412700, TraesCS2A02G415700						0.00791126	0.0488499	0.923501	0.347726	2.86701	6.26211	2.55141	8.10687	9.46751	10.842
TRITD4Av1G152710	NB-ARC	TraesCS4A02G194900						0.00801111	0.0493569	0.600787	0.226575	0.281129	0.177287	0.347958	0.499266	0.579772	0.380386
TRITD2Av1G041500	AMP-dependent synthetase/ligase	TraesCS2A02G145800, TraesCS2D02G150400, TraesCS2B02G171200	AT1G51680, AT3G21240					0.00802843	0.049433	1.35281	0.510325	0.431228	0.091006	0.0903343	0.813764	0.471441	0.687895
TRITD7Bv1G204250	F-box associated domain, type 3	TraesCS7B02G387700, TraesCS7D02G471500	AT4G22390, AT4G12560, AT1G33530					0.00807173	0.0496401	0.609103	0.229932	0.584594	0.558838	0.739856	1.53029	1.22254	0.844982
TRITD7Av1G249620	Protein kinase domain	TraesCS4A02G478700, TraesCS5B02G080100						0.0081046	0.0497857	1.00139	0.378213	0.192693	0.660201	0.510722	0.953821	1.06302	1.46705
TRITD6Av1G153100		TraesCS6A02G238200, TraesCSU02G041200, TraesCS5B02G214900						0.00811853	0.0498598	1.82228	0.688406	0.244517	0.685486	0	0.948687	2.49791	2.034

## Sheet: down
ensembl_gene_id	interpro_description	taestivum_eg_homolog_ensembl_gene	athaliana_eg_homolog_ensembl_gene		TF Family	Arabidopsis best hit TF	evalue	TF description	pval	qval	fc	se_fc	C_R1_(A)	C_R2_(B)	C_R3_(C)	HS_R1_(TR1D)	HS_R2_(TR2E)	HS_R3_(TR3L)
TRITD6Bv1G047750	Peptidase C1A, papain C-terminal	TraesCS7D02G060100, TraesCS7A02G065700, TraesCS4A02G422300		TRITD6Bv1G047750					4.43887e-58	1.32208e-54	-5.42128	0.337445	4.0845	4.81774	3.25151	0	0	0
TRITD3Bv1G174330	Xanthine/uracil/vitamin C permease	TraesCS3B02G330800, TraesCS3A02G305700, TraesCS3D02G296200	AT2G34190	TRITD3Bv1G174330					3.23934e-46	8.44213e-43	-1.02572	0.0718659	46.2416	43.068	41.8905	15.5961	15.6821	15.9475
TRITD2Av1G291390	Cystatin domain	TraesCS2A02G581500, TraesCS2B02G609300		TRITD2Av1G291390					3.92307e-33	6.54337e-30	-1.70966	0.142569	43.0665	43.137	46.711	7.22809	10.6098	6.70948
TRITD7Bv1G208300	Ribosomal protein S6	TraesCS7D02G481000, TraesCS7A02G493500	AT3G18760	TRITD7Bv1G208300					4.8077e-33	7.42487e-30	-4.83785	0.403998	6.67314	6.56442	4.75701	0	0	0
TRITD7Av1G261660	Aspartic peptidase A1 family	TraesCS7A02G502500, TraesCS7D02G489900, TraesCSU02G217000		TRITD7Av1G261660					2.10878e-32	3.03214e-29	-1.87271	0.158012	9.17386	9.50861	8.56829	1.19379	1.90939	1.18224
TRITD5Av1G051830	Type I phosphodiesterase/nucleotide pyrophosphatase/phosphate transferase	TraesCS5A02G093700, TraesCS5D02G106000, TraesCS5B02G099800	AT5G17250	TRITD5Av1G051830					1.11188e-31	1.44885e-28	-0.709549	0.0605852	62.3434	66.663	58.5348	28.9034	32.0251	31.7595
TRITD3Av1G191790	Xanthine/uracil/vitamin C permease	TraesCS3A02G305700, TraesCS3B02G330800, TraesCS3D02G296200	AT2G34190	TRITD3Av1G191790					7.6331e-31	9.36133e-28	-1.09652	0.0949605	91.4055	91.015	74.6228	27.456	31.7511	26.9533
TRITD6Av1G138780	S-adenosylmethionine decarboxylase	TraesCS6A02G219500, TraesCS6D02G202500, TraesCS6B02G249000		TRITD6Av1G138780					5.63851e-30	6.53096e-27	-0.69805	0.0613728	35.3867	37.6774	38.972	18.7204	18.2482	19.0228
TRITD2Av1G068660	Interferon-related developmental regulator, N-terminal	TraesCS2A02G193300, TraesCS2D02G194200, TraesCS2B02G213400	AT1G27760	TRITD2Av1G068660					1.07061e-29	1.20655e-26	-0.700522	0.0618953	32.8475	33.0236	32.2566	17.7251	14.8099	16.5444
TRITD5Av1G026510	Basic-leucine zipper domain	TraesCS5A02G057500, TraesCS5D02G068800, TraesCS5B02G059200	AT4G02640, AT3G54620	TRITD5Av1G026510	bZIP	AT5G28770.2	2e-38	bZIP family protein	1.04574e-27	1.06355e-24	-1.49476	0.137023	12.2462	16.3479	19.2184	3.68666	3.27606	3.60896
TRITD2Bv1G074970	Interferon-related developmental regulator, N-terminal	TraesCS2B02G213400, TraesCS2D02G194200, TraesCS2A02G193300	AT1G27760	TRITD2Bv1G074970					6.79358e-26	6.15824e-23	-0.649671	0.0617402	30.8605	30.3077	33.7692	16.7519	15.52	17.5654
TRITD6Av1G014740	Histone H3/CENP-A		AT5G12910	TRITD6Av1G014740					2.13088e-25	1.81334e-22	-4.59667	0.441375	6.60287	13.3334	9.14136	0	0	0
TRITD6Bv1G004280	Domain of unknown function DUF5637	TraesCS6B02G024500		TRITD6Bv1G004280					4.33617e-24	3.28745e-21	-4.52091	0.446566	10.7384	11.7838	8.57098	0	0	0
TRITD6Bv1G217370	Ribosomal protein L14P	TraesCS6A02G385700		TRITD6Bv1G217370					5.99382e-24	4.46304e-21	-1.70392	0.168839	296.964	265.871	176.398	42.8594	40.7603	48.8418
TRITD1Av1G019280	Bifunctional inhibitor/plant lipid transfer protein/seed storage helical domain superfamily			TRITD1Av1G019280					9.74698e-23	6.77383e-20	-1.84286	0.187768	51.9196	44.2683	33.1272	5.48388	8.68972	5.99779
TRITD3Av1G223540	Multicopper oxidase, type 1	TraesCS3A02G365500, TraesCS3D02G358600, TraesCS3B02G397300	AT5G01040, AT3G09220, AT5G01050	TRITD3Av1G223540					7.19285e-22	4.76076e-19	-0.999667	0.104014	23.7947	19.9333	16.9694	6.94606	7.87229	7.42443
TRITD1Av1G207510	NADH-ubiquinone reductase complex 1 MLRQ subunit	TraesCS1A02G404200, TraesCS1D02G412000, TraesCS1B02G433700		TRITD1Av1G207510					9.30751e-22	6.06413e-19	-0.959331	0.100094	105.623	125.73	107.92	41.9003	38.8933	50.2605
TRITD4Av1G020340	Cereal seed allergen/grain softness/trypsin and alpha-amylase inhibitor	TraesCS4A02G055200, TraesCS4B02G249400, TraesCS4D02G250000		TRITD4Av1G020340					2.06599e-21	1.30527e-18	-3.65749	0.384933	117.09	45.6432	158.085	2.00582	2.94192	2.3607
TRITD0Uv1G003780	Ornithine/DAP/Arg decarboxylase	TraesCS1B02G018200, TraesCS1D02G012300, TraesCS2A02G071000, TraesCS2A02G071200	AT4G34710, AT2G16500	TRITD0Uv1G003780					3.66226e-21	2.27924e-18	-5.28374	0.559608	2.57014	6.08674	5.08017	0.0158616	0	0.0394937
TRITD6Av1G146340	Signal transduction response regulator, receiver domain	TraesCS6A02G227900, TraesCS6B02G253900, TraesCS6D02G207100	AT5G61380	TRITD6Av1G146340					1.34796e-20	7.91649e-18	-0.815439	0.0876405	8.66496	7.12141	8.33891	3.12786	3.75831	3.83387
TRITD7Bv1G231440	PAZ domain	TraesCS7B02G482100, TraesCS7A02G557400, TraesCS7D02G552900, TraesCS7D02G553200, TraesCS7D02G553000	AT1G48410	TRITD7Bv1G231440					3.33008e-20	1.92858e-17	-1.31166	0.142451	10.2864	9.85603	7.30145	2.92084	2.22238	2.23289
TRITD7Av1G045290	Histone H2A	TraesCS7A02G147200, TraesCS7B02G050300		TRITD7Av1G045290					4.84367e-20	2.76673e-17	-0.659284	0.0719158	59.9743	73.7693	69.3763	36.6314	33.1752	35.5411
TRITD2Av1G031860	Aspartic peptidase A1 family	TraesCS2A02G115800, TraesCS2D02G119400, TraesCS2B02G135400, TraesCSU02G217000		TRITD2Av1G031860					8.86731e-20	4.80194e-17	-1.78332	0.195926	10.017	8.59747	9.92723	1.24736	2.3378	1.38667
TRITD1Bv1G072650		TraesCS1B02G148600, TraesCS1D02G133600		TRITD1Bv1G072650					9.11385e-20	4.87217e-17	-1.80233	0.198079	5.3766	6.8862	5.51428	1.08023	1.07646	0.749653
TRITD7Av1G276310	High mobility group box domain	TraesCS7A02G552400, TraesCS7D02G538400, TraesCSU02G099700	AT1G20693, AT2G17560, AT4G35570, AT1G20696	TRITD7Av1G276310					4.66137e-19	2.3418e-16	-0.685407	0.0768391	1247.54	1463.3	1302.25	652.656	632.399	751.204
TRITD3Av1G173390	Pyridoxal-phosphate dependent enzyme	TraesCS3A02G259700, TraesCS3B02G292900, TraesCS3D02G259800	AT4G29840, AT1G72810	TRITD3Av1G173390					1.36864e-18	6.4123e-16	-0.59547	0.0676674	18.2493	18.6426	16.9144	9.75968	9.92628	10.1001
TRITD6Bv1G133070	Signal transduction response regulator, receiver domain	TraesCS6B02G253900, TraesCS6A02G227900, TraesCS6D02G207100	AT5G61380	TRITD6Bv1G133070					2.02055e-18	9.25857e-16	-0.639919	0.0730824	11.1049	11.7712	12.402	6.22351	6.51312	5.94593
TRITD5Bv1G248590	Aspartic peptidase A1 family	TraesCS4A02G328100, TraesCS5D02G545600, TraesCSU02G217000		TRITD5Bv1G248590					2.51974e-18	1.12976e-15	-1.8906	0.216534	7.89369	4.61514	6.16196	0.736409	1.24105	0.827022
TRITD7Bv1G193520		TraesCS7B02G360700, TraesCS7B02G360500, TraesCS7D02G447800, TraesCS7A02G459900		TRITD7Bv1G193520					2.71429e-18	1.17896e-15	-1.63925	0.187927	231.3	192.656	194.404	31.6157	56.987	35.7273
TRITD4Bv1G183570	Membrane transport protein	TraesCS4B02G322800, TraesCS5A02G494900, TraesCS4D02G319200	AT5G65980, AT2G17500	TRITD4Bv1G183570					2.76469e-18	1.18848e-15	-2.25608	0.258704	3.01311	1.80025	3.30988	0.245194	0.278256	0.268663
TRITD4Bv1G058410	DEAD/DEAH box helicase domain	TraesCS4B02G134500, TraesCS4A02G184200	AT2G28600	TRITD4Bv1G058410					3.64692e-18	1.53605e-15	-0.703877	0.081005	10.2243	10.1866	11.3232	6.01113	5.15291	4.66829
TRITD7Av1G280710	S-phase kinase-associated protein 1-like	TraesCS7D02G545000, TraesCS7D02G544900, TraesCS7A02G565700, TraesCS7B02G492300, TraesCS7A02G565800, TraesCS7B02G492400, TraesCS7B02G492200, TraesCS7B02G492500		TRITD7Av1G280710					5.30582e-18	2.21242e-15	-4.35615	0.503799	8.2024	4.345	1.42178	0	0	0
TRITD7Bv1G206840	Aspartic peptidase A1 family	TraesCS7B02G397100, TraesCSU02G217000		TRITD7Bv1G206840					8.64506e-18	3.53413e-15	-1.91218	0.222587	13.1789	14.4428	14.2278	1.57155	3.21259	1.72529
TRITD5Bv1G157750	Oxoglutarate/iron-dependent dioxygenase	TraesCS5B02G282100, TraesCS5D02G290600, TraesCS5A02G283100, TraesCS6A02G148800, TraesCS5A02G282800	AT1G49390, AT5G20400	TRITD5Bv1G157750					1.89586e-17	7.6013e-15	-1.84592	0.217167	28.7286	21.578	23.795	2.78858	5.63114	3.71802
TRITD6Bv1G207720	Neprosin	TraesCS6B02G392100, TraesCS6D02G342300, TraesCS6A02G359400		TRITD6Bv1G207720					2.53781e-17	9.98316e-15	-1.87281	0.221214	9.70185	7.03878	7.81442	1.07405	1.8589	0.953571
TRITD4Bv1G112480	ABC transporter-like	TraesCS4D02G180700, TraesCS4A02G125500, TraesCS4B02G179200	AT5G02270	TRITD4Bv1G112480					2.9886e-17	1.14329e-14	-0.589227	0.0697557	28.5299	28.4193	29.6022	15.9865	16.6964	15.5864
TRITD3Bv1G242100	Knottin, scorpion toxin-like	TraesCS3B02G476200, TraesCS3D02G435100, TraesCS3A02G442400		TRITD3Bv1G242100					3.62528e-17	1.37425e-14	-2.45898	0.291887	265.206	163.003	185.39	12.5302	28.3309	13.8475
TRITD5Bv1G115320	Protein arginine N-methyltransferase	TraesCS5B02G187400, TraesCS5A02G196000, TraesCS5D02G195000	AT4G29510, AT2G19670	TRITD5Bv1G115320					1.493e-16	5.14505e-14	-0.6486	0.078551	21.4285	21.5896	22.9161	12.0214	11.4309	11.1844
TRITD3Bv1G274380		TraesCS3B02G580800, TraesCS3D02G520000, TraesCS3A02G512700		TRITD3Bv1G274380					2.45251e-16	8.38237e-14	-2.23703	0.272889	2.39114	2.27463	1.75322	0.304654	0.152276	0.216811
TRITD7Av1G137630	Afadin/alpha-actinin-binding	TraesCS7A02G292000, TraesCS7D02G288000, TraesCS7B02G183000	AT2G18876, AT5G57410	TRITD7Av1G137630					2.78829e-16	9.30129e-14	-0.611111	0.0746883	19.7043	19.253	21.0214	10.289	12.3827	10.1539
TRITD4Bv1G125370	Thioredoxin domain	TraesCS4B02G196700, TraesCS4A02G107900, TraesCS4D02G197000	AT1G07960	TRITD4Bv1G125370					4.60596e-16	1.47738e-13	-3.97632	0.489606	9.59348	3.83952	3.9949	0.0928967	0	0.112459
TRITD3Av1G250390	Knottin, scorpion toxin-like	TraesCS3A02G442700, TraesCS3D02G435300		TRITD3Av1G250390					4.94198e-16	1.57306e-13	-1.59246	0.196287	1213.95	952.38	1103.6	161.768	305.814	221.218
TRITD7Bv1G040260	Major intrinsic protein	TraesCS7B02G096000, TraesCS7D02G192200, TraesCS7A02G191200		TRITD7Bv1G040260					5.5161e-16	1.7425e-13	-4.10889	0.507298	0.865605	2.34257	1.33592	0	0	0
TRITD3Av1G250300	Knottin, scorpion toxin-like	TraesCS3A02G442500, TraesCS3B02G476300		TRITD3Av1G250300					9.15818e-16	2.84983e-13	-1.96461	0.244426	1850.59	955.863	1223.86	175.739	244.204	140.401
TRITD5Bv1G136210		TraesCS5B02G230700, TraesCS4A02G365100		TRITD5Bv1G136210					2.64439e-15	7.60454e-13	-4.41521	0.558418	5.72973	7.05933	4.32837	0	0	0
TRITD6Av1G036110	Zinc finger, BED-type		AT3G42170	TRITD6Av1G036110					4.08104e-15	1.13447e-12	-0.707908	0.0901516	6.79346	5.91516	7.0649	3.26786	2.862	3.67673
TRITD5Av1G136950	Protein arginine N-methyltransferase	TraesCS5A02G196000, TraesCS5B02G187400, TraesCS5D02G195000	AT4G29510, AT2G19670	TRITD5Av1G136950					6.16114e-15	1.67913e-12	-0.730398	0.0936336	14.0836	12.7181	15.9603	6.62501	7.88765	6.19495
TRITD2Bv1G008260	NB-ARC	TraesCSU02G001700		TRITD2Bv1G008260					6.48291e-15	1.75535e-12	-0.860236	0.110369	50.4846	67.0989	56.5816	21.7189	24.4128	27.7946
TRITD5Av1G003250	Peptidase S1C	TraesCS5A02G008300, TraesCS5D02G013900, TraesCS5B02G006600		TRITD5Av1G003250					1.70235e-14	4.40897e-12	-2.47178	0.32221	2.7032	0.97027	1.4369	0.11314	0.129044	0.120215
TRITD3Bv1G059880		TraesCS3B02G161500, TraesCS3D02G144000		TRITD3Bv1G059880					1.98723e-14	5.08366e-12	-0.69047	0.0902404	17.6977	14.6503	15.758	7.80128	7.63105	8.75791
TRITD7Bv1G114060	Brix domain	TraesCS7B02G201700, TraesCS7A02G301400, TraesCS7D02G296800	AT1G63780	TRITD7Bv1G114060					2.15226e-14	5.47225e-12	-0.599751	0.0784892	31.407	34.5283	31.9262	20.6964	17.1798	16.3564
TRITD5Bv1G080170		TraesCS5B02G128900, TraesCS5D02G056300, TraesCS5A02G046200		TRITD5Bv1G080170					2.30237e-14	5.81843e-12	-1.66196	0.217747	1.89514	1.94395	1.94505	0.231402	0.488831	0.411502
TRITD2Av1G280980	Bifunctional inhibitor/plant lipid transfer protein/seed storage helical domain	TraesCS2A02G534000, TraesCS2B02G564300		TRITD2Av1G280980					3.97037e-14	9.62537e-12	-3.18886	0.421697	13.7856	10.7952	16.2467	0.761545	0.68089	0.186402
TRITD4Bv1G029230	Protein of unknown function DUF3615	TraesCS4B02G085000, TraesCS7D02G264100, TraesCS7D02G251700		TRITD4Bv1G029230					4.53146e-14	1.07973e-11	-3.50979	0.465196	4.73907	2.43572	2.26328	0.0369335	0.167469	0.0458176
TRITD0Uv1G010800	Protein translocase complex, SecE/Sec61-gamma subunit	TraesCS2A02G356100, TraesCS7A02G455100, TraesCS2A02G055100, TraesCS6B02G228700, TraesCS7D02G486200	AT3G48570	TRITD0Uv1G010800					7.96041e-14	1.86479e-11	-4.56225	0.610663	47.808	17.2996	14.85	0	0.505981	0
TRITD6Bv1G000060	Cereal seed allergen/trypsin and alpha-amylase inhibitor, conserved site	TraesCS6D02G000200		TRITD6Bv1G000060					1.43526e-13	3.18338e-11	-2.24501	0.303666	223.35	102.848	213.961	13.4505	24.851	17.6855
TRITD1Bv1G135680	Tocopherol cyclase	TraesCS1B02G236600, TraesCS1D02G224900, TraesCS1A02G223300	AT4G32770	TRITD1Bv1G135680					1.51938e-13	3.29975e-11	-0.590094	0.0798995	11.0906	9.82632	10.2233	5.06702	6.17034	6.15021
TRITD2Av1G199310	Amino acid transporter, transmembrane domain	TraesCS2A02G338800, TraesCS2D02G324300, TraesCS2B02G343200		TRITD2Av1G199310					2.00071e-13	4.32257e-11	-1.48586	0.202192	4.34981	5.57209	7.95661	1.59126	1.12978	1.23638
TRITD3Bv1G009530	Proteinase inhibitor I12, Bowman-Birk	TraesCS3B02G037400, TraesCS3A02G046000, TraesCS3D02G034200, TraesCS3A02G046100		TRITD3Bv1G009530					3.50456e-13	6.99203e-11	-1.25183	0.172109	18.3544	22.4293	19.5195	4.73058	5.07308	7.85959
TRITD7Bv1G037560	NADP-dependent oxidoreductase domain	TraesCS7B02G089600, TraesCS7D02G186400, TraesCS7A02G185000		TRITD7Bv1G037560					3.76986e-13	7.4855e-11	-1.50562	0.207284	2.4936	2.56056	3.06289	0.435062	0.725063	0.644277
TRITD7Av1G005960	Pectinesterase inhibitor domain			TRITD7Av1G005960					4.09186e-13	8.08637e-11	-1.67137	0.230455	195.554	175.198	140.149	25.8698	48.4902	25.8155
TRITD3Av1G227650	Proton-dependent oligopeptide transporter family	TraesCS3A02G382100, TraesCS3D02G375900, TraesCS3B02G414800, TraesCS7B02G040100, TraesCS2B02G248000, TraesCS3B02G304500, TraesCS4B02G057000	AT1G72120, AT1G22570, AT1G22540, AT1G72140, AT1G22550, AT1G72130, AT1G72125, AT3G54450	TRITD3Av1G227650					5.86835e-13	1.12764e-10	-0.639307	0.0887494	6.99647	9.21083	7.94939	4.1332	4.53676	4.06467
TRITD4Bv1G186120	Cereal seed allergen/trypsin and alpha-amylase inhibitor, conserved site	TraesCS4B02G328000, TraesCS4D02G325000		TRITD4Bv1G186120					7.39302e-13	1.38862e-10	-2.64153	0.368314	1101.81	465.429	1001.82	56.8288	89.7583	37.05
TRITD3Av1G220640	Basic-leucine zipper domain	TraesCS3A02G372000, TraesCS3D02G365500, TraesCS3D02G365000	AT2G36270	TRITD3Av1G220640	bZIP	AT2G36270.1	1e-46	bZIP family protein	8.14206e-13	1.52246e-10	-1.56818	0.219059	3.48267	2.53111	2.39872	0.385874	0.701218	0.674703
TRITD1Bv1G134550		TraesCS1B02G233000, TraesCS1D02G221200, TraesCS1A02G219700		TRITD1Bv1G134550					9.19984e-13	1.7013e-10	-0.965009	0.135118	9.10729	6.66664	8.34024	2.49152	3.22725	3.49616
TRITD2Bv1G154610	Cleft lip and palate transmembrane 1	TraesCS2B02G326300, TraesCS2A02G309200, TraesCS2D02G307500	AT5G23575, AT5G08500	TRITD2Bv1G154610					1.07141e-12	1.93401e-10	-0.616627	0.0865927	48.3289	41.5322	49.0312	28.68	22.8971	23.9373
TRITD4Bv1G017000	Carbohydrate kinase PfkB	TraesCS4B02G054400, TraesCS4D02G054500, TraesCS4A02G260200	AT1G19600	TRITD4Bv1G017000					1.09337e-12	1.96515e-10	-0.661916	0.0929891	10.5442	9.40319	10.5999	5.80707	4.73247	5.31345
TRITD2Av1G006180	Knottin, scorpion toxin-like	TraesCS2A02G024000, TraesCS2A02G024100, TraesCS2B02G034400, TraesCS2D02G025200		TRITD2Av1G006180					1.27163e-12	2.266e-10	-1.56522	0.220536	79.2235	75.2196	67.7139	10.4445	16.321	21.6946
TRITD1Av1G210730	Thionin	TraesCS1A02G398200, TraesCS1D02G405700, TraesCS1B02G426100, TraesCSU02G193300, TraesCSU02G219800		TRITD1Av1G210730					1.32069e-12	2.3434e-10	-2.77165	0.390807	902.535	350.258	844.484	37.5104	64.8914	27.2773
TRITD7Bv1G190750	Domain of unknown function DUF642	TraesCS7B02G353600, TraesCS7D02G442500, TraesCS7A02G453100	AT5G25460, AT4G32460, AT1G80240, AT5G11420	TRITD7Bv1G190750					1.41524e-12	2.48999e-10	-0.631155	0.0891141	82.9911	94.6695	80.8327	40.8418	45.3959	52.4022
TRITD1Bv1G136250	Adenosine/AMP deaminase domain	TraesCS1B02G238200, TraesCS1A02G225000, TraesCS1D02G226400	AT2G38280	TRITD1Bv1G136250					1.444e-12	2.52991e-10	-0.629607	0.0889304	14.151	13.2179	17.0296	8.66861	7.41588	7.60449
TRITD2Av1G224260		TraesCS2A02G378600, TraesCS2D02G375000, TraesCS2B02G395600		TRITD2Av1G224260					1.48679e-12	2.59398e-10	-0.792651	0.112024	11.9927	8.80098	10.2705	4.98452	4.45311	4.56771
TRITD1Bv1G126900	PPM-type phosphatase, divalent cation binding	TraesCS1B02G216500, TraesCS1A02G202300, TraesCS1D02G205700	AT3G51470, AT2G33700	TRITD1Bv1G126900					1.49457e-12	2.59669e-10	-0.775675	0.109636	8.46022	8.17981	7.55478	3.45797	4.15066	3.58074
TRITD7Av1G279160	Peptidase S9, prolyl oligopeptidase, catalytic domain	TraesCS7A02G562600, TraesCS7B02G500300, TraesCS7D02G548000	AT1G50380	TRITD7Av1G279160					1.60821e-12	2.78253e-10	-0.595313	0.0842643	13.3393	13.6235	11.782	7.19451	7.45629	6.78776
TRITD6Av1G014650	Histone H2A	TraesCS6A02G062600, TraesCS6D02G062800, TraesCS6B02G082300, TraesCS6B02G082100		TRITD6Av1G014650					1.66983e-12	2.86537e-10	-4.01072	0.568122	7.54352	11.3116	5.83541	0	0.253137	0.143452
TRITD4Bv1G150270	Cereal seed allergen/grain softness/trypsin and alpha-amylase inhibitor	TraesCS4B02G249400, TraesCS4D02G250000, TraesCS4A02G055200		TRITD4Bv1G150270					2.17539e-12	3.65764e-10	-4.53709	0.646056	132.716	19.7712	128.341	0.622954	1.00054	0.547376
TRITD1Av1G161380	Methyl-CpG DNA binding	TraesCS1A02G253100, TraesCS1B02G265000, TraesCS1D02G252700, TraesCSU02G256900, TraesCS1D02G252800		TRITD1Av1G161380					2.34453e-12	3.8949e-10	-1.25648	0.179182	16.6132	12.2462	11.5525	2.85673	4.42769	4.30706
TRITD1Bv1G169870		TraesCS1B02G310900, TraesCS1A02G301000, TraesCS1D02G300400, TraesCS1D02G300600		TRITD1Bv1G169870	WRKY	AT2G40740.1	1e-19	WRKY DNA-binding protein 55	2.34235e-12	3.8949e-10	-3.92941	0.56035	1.42207	2.18066	1.15486	0	0	0
TRITD5Bv1G122810	Neprosin	TraesCS5B02G201500	AT1G10750	TRITD5Bv1G122810					2.44308e-12	4.04253e-10	-2.48464	0.354619	3.03919	2.27534	2.07645	0.156011	0.354064	0.116241
TRITD6Av1G194490	Tetratricopeptide-like helical domain superfamily	TraesCS6A02G318800, TraesCS6B02G349000, TraesCS6D02G298000	AT5G09420	TRITD6Av1G194490					2.97688e-12	4.75594e-10	-0.642262	0.0920303	10.2755	9.19368	11.159	4.7532	6.0579	5.40174
TRITD1Av1G211520	Auxin response factor	TraesCS1A02G396400, TraesCS1D02G404400, TraesCS1B02G424700	AT2G33860	TRITD1Av1G211520	ARF	AT2G33860.1	1e-168	ARF family protein	3.05452e-12	4.86135e-10	-0.594941	0.0852939	6.06802	6.59688	6.96462	3.44509	3.66339	3.75647
TRITD2Av1G147130	Protein kinase domain	TraesCS2A02G260600, TraesCS2D02G263100, TraesCS2B02G281400	AT3G02130	TRITD2Av1G147130					3.20933e-12	5.06904e-10	-1.22302	0.175514	13.8326	10.1318	11.172	2.74043	4.5987	3.20275
TRITD5Bv1G111470	Xanthine/uracil/vitamin C permease	TraesCS5B02G180200, TraesCS5D02G186600, TraesCS5A02G182200	AT2G34190	TRITD5Bv1G111470					3.61522e-12	5.66719e-10	-0.658524	0.0947317	6.14859	5.67808	6.30834	2.6646	3.37573	3.43303
TRITD7Av1G085750	Myb/SANT-like domain	TraesCS7A02G234200		TRITD7Av1G085750					4.58947e-12	7.00995e-10	-3.77868	0.546232	1.93488	2.41525	2.22785	0	0	0.120437
TRITD3Bv1G194780	Expansin	TraesCS3B02G376900, TraesCS3D02G338400, TraesCS3D02G338600, TraesCS3A02G344800	AT5G05290	TRITD3Bv1G194780					4.67775e-12	7.11871e-10	-0.588467	0.0850997	35.1296	33.1964	29.5435	19.6186	19.2765	15.8294
TRITD7Bv1G193590	Bifunctional inhibitor/plant lipid transfer protein/seed storage helical domain	TraesCS7B02G360900, TraesCS7D02G448100, TraesCS7A02G460100		TRITD7Bv1G193590					5.35394e-12	8.05951e-10	-1.61871	0.234736	9.88533	8.23336	6.82538	1.26121	1.65113	1.93574
TRITD6Bv1G213170	Aspartic peptidase A1 family	TraesCS6B02G410400, TraesCS6D02G356600, TraesCS6A02G372500	AT4G04460, AT1G62290, AT1G11910	TRITD6Bv1G213170					7.11195e-12	1.05535e-09	-2.28261	0.332966	50.0415	22.5497	52.2598	3.49038	5.87005	3.08252
TRITD5Bv1G084650	Neprosin	TraesCS5B02G134000, TraesCS5D02G141700, TraesCS5A02G135200		TRITD5Bv1G084650					8.88633e-12	1.30473e-09	-1.2756	0.186943	8.43562	6.62305	4.64749	1.59295	2.03426	1.74306
TRITD6Bv1G186970	Amidase signature domain	TraesCS6B02G349000, TraesCS6D02G298000, TraesCS6A02G318800	AT5G09420	TRITD6Bv1G186970					1.0355e-11	1.50747e-09	-0.661863	0.0973116	12.4648	12.5874	12.7385	6.92211	6.18749	6.49066
TRITD6Bv1G137970	CTD phosphatase Fcp1	TraesCS6B02G264000, TraesCS6A02G235300, TraesCS6D02G218000	AT4G21670	TRITD6Bv1G137970					1.19818e-11	1.70806e-09	-0.628432	0.0926831	9.11757	8.55979	8.79467	4.94986	4.6217	4.61663
TRITD0Uv1G015940	Cystatin domain	TraesCS2B02G502100, TraesCS2D02G477600		TRITD0Uv1G015940					1.33055e-11	1.88071e-09	-1.22872	0.181622	71.5126	92.7462	68.3874	16.7652	26.4794	25.9759
TRITD7Bv1G028510	Cereal seed allergen/trypsin and alpha-amylase inhibitor, conserved site	TraesCS7B02G072000, TraesCS7D02G168000		TRITD7Bv1G028510					1.38291e-11	1.94156e-09	-3.20513	0.474154	682.37	178.306	659.464	19.734	22.5831	12.1388
TRITD6Av1G014700	Histone H4	TraesCS5B02G356200, TraesCS6A02G062800, TraesCS2D02G414900, TraesCS1B02G301000, TraesCS6A02G260700		TRITD6Av1G014700					1.47697e-11	2.06667e-09	-1.5823	0.234409	21.7649	30.282	17.6705	5.88448	4.2066	3.954
TRITD5Bv1G104090	AMP-dependent synthetase/ligase	TraesCS5B02G166400, TraesCS5D02G174000, TraesCS5A02G169600	AT2G04350	TRITD5Bv1G104090					1.54282e-11	2.1373e-09	-0.736633	0.109231	12.7676	10.632	8.97133	4.88352	5.55367	4.98673
TRITD0Uv1G051540	GAF domain	TraesCS5B02G527300, TraesCS4A02G344200	AT2G40940	TRITD0Uv1G051540					1.65191e-11	2.28084e-09	-0.946389	0.140541	13.5825	10.2928	12.964	3.94637	5.88287	4.61349
TRITD6Av1G150370		TraesCS6A02G233100, TraesCS6D02G216000, TraesCS6B02G260100	AT4G05090	TRITD6Av1G150370					1.9866e-11	2.69828e-09	-3.77901	0.563442	0.592439	0.862075	0.560165	0	0	0
TRITD5Bv1G024210	Basic-leucine zipper domain	TraesCS5B02G059200, TraesCS5D02G068800, TraesCS5A02G057500	AT4G02640, AT3G54620	TRITD5Bv1G024210	bZIP	AT5G28770.2	4e-39	bZIP family protein	1.99929e-11	2.70671e-09	-1.09793	0.163722	9.93322	13.4519	16.8722	4.21229	4.07815	4.90929
TRITD1Bv1G150910		TraesCS1B02G271400, TraesCS1A02G260800		TRITD1Bv1G150910					2.24482e-11	3.02928e-09	-2.60561	0.389528	85.7472	35.5335	75.5813	2.74335	7.34641	4.51321
TRITD3Av1G286000	Histone H2A	TraesCS3A02G534300, TraesCS3D02G539700, TraesCS3B02G611300		TRITD3Av1G286000					2.26214e-11	3.0428e-09	-0.72038	0.107712	34.8522	29.9319	29.2607	15.12	16.6826	14.1178
TRITD1Av1G165140		TraesCS1A02G260800, TraesCS1B02G271400		TRITD1Av1G165140					2.4809e-11	3.30507e-09	-2.48226	0.371902	27.9647	14.9716	24.0286	1.04602	3.25163	1.6838
TRITD1Bv1G041050	Saf4/Yju2 protein			TRITD1Bv1G041050					3.30287e-11	4.29044e-09	-3.75585	0.566289	2.73099	2.42401	2.1469	0	0	0
TRITD7Av1G070270	Glycoside hydrolase family 9	TraesCS7A02G204500, TraesCS7D02G207600, TraesCS7B02G111700	AT1G70710, AT1G23210	TRITD7Av1G070270					3.84838e-11	4.89237e-09	-1.05581	0.159734	4.4738	6.10711	5.49137	2.24162	1.44819	1.94749
TRITD0Uv1G116420	Cystatin domain	TraesCS2B02G502100, TraesCS2D02G477600		TRITD0Uv1G116420					4.53351e-11	5.67683e-09	-1.20832	0.183482	66.9633	91.8124	68.0749	16.7652	25.9757	25.9759
TRITD4Av1G220310	RNA recognition motif domain	TraesCS4A02G355700, TraesCS5B02G516400, TraesCS5D02G516500	AT3G26420	TRITD4Av1G220310					5.20423e-11	6.38253e-09	-0.782416	0.11918	9.46876	10.5749	11.4482	4.86605	4.48219	5.06191
TRITD3Av1G147490	ATP-dependent RNA helicase DEAD-box, conserved site	TraesCS3A02G222700, TraesCS3D02G230400, TraesCS3B02G252600	AT5G08620, AT5G08610, AT5G63630	TRITD3Av1G147490					5.47437e-11	6.69415e-09	-0.65253	0.09951	7.87014	7.98629	8.40754	4.95355	3.55731	4.28387
TRITD2Bv1G262830	Plant peroxidase	TraesCS2B02G615600, TraesCS2A02G571700, TraesCS2D02G583200		TRITD2Bv1G262830					5.61017e-11	6.84014e-09	-1.15446	0.176151	3.3585	2.94546	3.7605	1.06425	0.80491	1.33327
TRITD6Av1G178550	Ubiquitin-conjugating enzyme E2	TraesCS6A02G283900, TraesCS6D02G264400, TraesCS6B02G311600, TraesCS6B02G311500	AT1G36340	TRITD6Av1G178550					5.82266e-11	7.07852e-09	-3.71858	0.567877	1.7869	0.765324	1.44987	0	0	0
TRITD2Av1G247770	Zinc/iron permease	TraesCS2A02G424200, TraesCS2D02G422000, TraesCS2B02G443800	AT5G62160, AT3G12750	TRITD2Av1G247770					7.41528e-11	8.88513e-09	-0.66071	0.10146	10.4006	10.907	9.99347	6.20327	5.45813	4.66602
TRITD1Av1G013960				TRITD1Av1G013960					1.00632e-10	1.16237e-08	-0.738048	0.114143	19.1339	17.2565	21.6589	9.87827	8.2044	9.74328
TRITD7Av1G279150	mRNA splicing factor Cwf18-like	TraesCS7B02G500000, TraesCS7D02G547900, TraesCS7A02G562700	AT3G05070	TRITD7Av1G279150					1.22953e-10	1.39318e-08	-1.32379	0.205697	17.7068	15.5455	10.7134	3.34889	3.29104	5.03053
TRITD2Bv1G036540	PA domain	TraesCS2B02G122400, TraesCS2A02G105500, TraesCS2D02G105100	AT2G30290, AT3G52850	TRITD2Bv1G036540					1.73262e-10	1.92658e-08	-1.0928	0.171196	19.4189	12.3111	14.7388	4.15616	6.12092	5.28576
TRITD3Av1G250280	Knottin, scorpion toxin-like	TraesCS3A02G442400, TraesCS3B02G476200, TraesCS3D02G435100		TRITD3Av1G250280					1.73059e-10	1.92658e-08	-1.65828	0.259775	311.297	203.621	192.999	34.5856	67.397	36.3203
TRITD7Bv1G149290	Multicopper oxidase, type 1	TraesCS7B02G265300, TraesCS7D02G361200, TraesCS7A02G361800	AT5G21100, AT5G21105	TRITD7Bv1G149290					1.86143e-10	2.05883e-08	-1.55879	0.244618	2.79471	1.28568	2.13609	0.422989	0.481409	0.341665
TRITD7Av1G006160	Pectinesterase inhibitor domain	TraesCS7A02G029300, TraesCS7B02G459100		TRITD7Av1G006160					1.93871e-10	2.12737e-08	-1.51806	0.238459	51.0573	42.5765	40.7546	6.57349	14.585	9.81743
TRITD4Av1G256310	Pectinesterase inhibitor domain	TraesCS7D02G082400, TraesCS7D02G025400, TraesCS4A02G460700, TraesCS7B02G459100		TRITD4Av1G256310					2.19203e-10	2.36184e-08	-2.06612	0.325514	19.6769	11.7814	11.6971	1.53072	3.01637	1.16145
TRITD1Bv1G154250		TraesCS1B02G278900, TraesCS1D02G268200, TraesCS1A02G268300		TRITD1Bv1G154250					2.55916e-10	2.7362e-08	-2.38412	0.377034	17.6169	12.9148	15.2459	0.816982	1.20352	1.99929
TRITD7Bv1G165540	Non-structural maintenance of chromosome element 4, C-terminal	TraesCS7B02G302500, TraesCS7A02G402400, TraesCS7D02G396200		TRITD7Bv1G165540					2.80991e-10	2.96627e-08	-0.67119	0.106388	6.14824	5.8627	5.31373	2.75031	2.99375	3.136
TRITD2Av1G258990	Ubiquitin-like domain	TraesCS2A02G458600, TraesCS2B02G480500, TraesCS2D02G459100		TRITD2Av1G258990					2.97127e-10	3.12869e-08	-0.873045	0.138573	21.6936	31.1942	24.0634	10.0266	9.6598	12.3855
TRITD2Av1G200020	Amino acid transporter, transmembrane domain	TraesCS2A02G337400, TraesCS2B02G344500, TraesCS2D02G325500	AT1G25530	TRITD2Av1G200020					3.52203e-10	3.62419e-08	-3.26787	0.520871	1.0268	0.589111	1.14099	0	0.0542556	0.0308763
TRITD7Av1G171910	Glycoside hydrolase, family 28	TraesCS7A02G323800, TraesCS7B02G224700, TraesCS7D02G320900	AT4G33440	TRITD7Av1G171910					4.19185e-10	4.22203e-08	-0.584543	0.0935762	10.5502	8.7402	8.79991	4.64039	5.84522	5.24418
TRITD4Bv1G186130	Cereal seed allergen/trypsin and alpha-amylase inhibitor, conserved site	TraesCS4B02G328100, TraesCS4D02G325100		TRITD4Bv1G186130					4.89781e-10	4.83954e-08	-2.68567	0.431618	709.06	218.312	718.796	30.765	46.8312	24.8326
TRITD4Bv1G184350	Knottin, scorpion toxin-like	TraesCS5A02G496500, TraesCS4D02G321100		TRITD4Bv1G184350					5.14969e-10	5.05251e-08	-1.90228	0.306106	61.583	22.8985	45.7594	5.25936	7.41689	5.25489
TRITD2Av1G098880	SANT/Myb domain	TraesCS2A02G230400, TraesCS2B02G252000, TraesCS2D02G234000	AT3G12720	TRITD2Av1G098880	MYB	AT3G12720.1	6e-84	myb domain protein 67	5.36349e-10	5.23763e-08	-1.41381	0.227738	2.17372	1.91896	1.84873	0.338452	0.684864	0.451962
TRITD7Av1G172920	Splicing factor SF3a60 binding domain	TraesCS7A02G325300, TraesCS7B02G226000, TraesCS7D02G321900	AT5G06160	TRITD7Av1G172920					5.92386e-10	5.73414e-08	-0.583867	0.0942871	7.13771	6.1703	6.83773	4.29668	3.81768	3.22417
TRITD7Bv1G026400	Aldose 1-/Glucose-6-phosphate 1-epimerase	TraesCS7B02G067000, TraesCS7D02G163100	AT3G01260, AT3G47800, AT5G15140	TRITD7Bv1G026400					6.08489e-10	5.85976e-08	-1.85745	0.30016	4.37253	1.95182	4.86509	0.438115	0.623497	0.546467
TRITD7Av1G222260	Myb domain, plants	TraesCS7A02G411100, TraesCS7B02G310300, TraesCS7D02G404100		TRITD7Av1G222260	G2-like	AT4G16110.1	2e-19	response regulator 2	7.68702e-10	7.28485e-08	-0.657965	0.106964	4.52955	3.69638	3.74232	1.93487	2.01288	2.25569
TRITD7Av1G250380	BTB/POZ domain	TraesCS7D02G459200		TRITD7Av1G250380					8.52889e-10	7.99186e-08	-3.63881	0.593147	0.660405	0.64944	0.437421	0	0	0
TRITD1Bv1G026230	Pectinesterase inhibitor domain	TraesCS3B02G012300, TraesCS3A02G009500, TraesCS3A02G010200		TRITD1Bv1G026230					8.61476e-10	8.05422e-08	-1.21181	0.197583	6.41639	5.20476	7.1898	1.3497	1.82684	2.49903
TRITD3Av1G175410	PCH1	TraesCS3B02G297200, TraesCS3D02G263800		TRITD3Av1G175410					8.99096e-10	8.38714e-08	-0.945611	0.154351	2.40149	1.75093	2.37536	0.828079	0.860121	0.814915
TRITD6Bv1G222360	F-box domain	TraesCS6B02G440700, TraesCS6D02G384600, TraesCS6A02G400400		TRITD6Bv1G222360					9.26652e-10	8.62489e-08	-3.40053	0.555501	0.844363	0.325456	0.38031	0	0	0.0241151
TRITD4Av1G256440	Cytochrome P450	TraesCS4A02G460100, TraesCS7D02G026000	AT1G05160, AT2G32440	TRITD4Av1G256440					9.58724e-10	8.82492e-08	-1.68841	0.276058	16.2184	10.0058	10.9077	1.44748	3.26864	2.36857
TRITD1Bv1G130670	Major pollen allergen Lol pI	TraesCS1B02G225700, TraesCS1D02G215100, TraesCS1A02G212000	AT2G45110, AT1G65681, AT3G60570	TRITD1Bv1G130670					9.93015e-10	9.10038e-08	-0.612949	0.10031	19.7509	25.9944	21.3867	11.4189	13.5139	11.4768
TRITD4Bv1G012950	Homologous-pairing protein 2, winged helix domain	TraesCS4B02G045000, TraesCS4D02G044700, TraesCS4A02G269200	AT1G13330	TRITD4Bv1G012950					1.06732e-09	9.75207e-08	-0.631094	0.103475	15.6681	13.202	16.0618	8.78534	6.73572	8.56015
TRITD7Bv1G229260	Glycoside hydrolase, family 13, N-terminal	TraesCS7B02G472400, TraesCS7D02G535500, TraesCS7A02G549200		TRITD7Bv1G229260					1.0688e-09	9.75207e-08	-1.53143	0.251105	2.29745	1.18619	2.06603	0.280767	0.470786	0.415405
TRITD0Uv1G054990	NB-ARC	TraesCS6B02G013300, TraesCS3A02G009200		TRITD0Uv1G054990					1.07638e-09	9.77845e-08	-3.16243	0.518631	0.284369	0.291923	0.348693	0	0.0214497	0.0118092
TRITD4Av1G256320	Pectinesterase inhibitor domain	TraesCS7D02G082300, TraesCS7D02G025500		TRITD4Av1G256320					1.10246e-09	9.97184e-08	-1.93211	0.31706	50.1467	26.44	27.7084	3.91276	7.86246	3.62993
TRITD3Av1G008820	Aldo/keto reductase, conserved site	TraesCS3A02G038400, TraesCS3D02G041300, TraesCS3B02G045400		TRITD3Av1G008820					1.11183e-09	1.00132e-07	-3.60655	0.591968	0.837826	1.12512	0.82848	0	0	0
TRITD7Bv1G195570		TraesCS7B02G366100, TraesCS7A02G465400		TRITD7Bv1G195570					1.19212e-09	1.06671e-07	-0.72654	0.119471	12.9311	18.0308	13.0371	7.18154	7.44291	6.50396
TRITD7Bv1G227220		TraesCS7B02G466100, TraesCSU02G225500, TraesCS7A02G543800, TraesCS7D02G529700, TraesCSU02G246300		TRITD7Bv1G227220					1.26583e-09	1.12601e-07	-1.74932	0.288112	20.5427	17.015	14.3065	2.49084	5.04494	2.04457
TRITD7Av1G163270	ELMO domain	TraesCS7A02G312900, TraesCS7B02G212800, TraesCS7D02G309300, TraesCS7B02G212900	AT3G43400, AT1G67400	TRITD7Av1G163270					1.45112e-09	1.27926e-07	-0.918628	0.151847	6.03434	4.43994	5.60149	2.18996	2.27684	1.90925
TRITD5Bv1G204480		TraesCS5B02G407800, TraesCS5D02G413000		TRITD5Bv1G204480					1.7117e-09	1.47468e-07	-1.2058	0.200198	33.9417	45.8645	36.6425	10.878	15.828	8.73534
TRITD1Bv1G200470	Nucleotide-diphospho-sugar transferase	TraesCS1B02G253400, TraesCS1D02G241600, TraesCS1A02G241700	AT4G01770, AT4G01220, AT4G01750, AT1G56550	TRITD1Bv1G200470					1.80525e-09	1.54569e-07	-3.8426	0.638898	0.780766	1.60284	0.307304	0	0	0
TRITD4Av1G042380	Hexapeptide repeat	TraesCS4A02G094000, TraesCS4D02G211100, TraesCS4B02G210300	AT2G39770, AT3G55590	TRITD4Av1G042380					1.81045e-09	1.54697e-07	-0.80073	0.133145	32.0858	21.5795	31.9693	12.0499	13.627	12.3804
TRITD5Av1G116250	Zinc finger, Dof-type	TraesCS5A02G155900, TraesCS5D02G161000, TraesCS5B02G154100		TRITD5Av1G116250	Dof	AT5G60200.1	4e-34	TARGET OF MONOPTEROS 6	2.08702e-09	1.74398e-07	-1.10745	0.184856	21.5934	15.5051	17.196	4.3292	7.22997	6.70515
TRITD4Av1G218720	Aspartic peptidase A1 family	TraesCS4A02G350400, TraesCS5B02G522600, TraesCSU02G217000		TRITD4Av1G218720					2.23169e-09	1.85373e-07	-1.49335	0.249725	57.9877	40.9931	41.8366	7.61793	16.1996	9.25687
TRITD2Bv1G007420	Knottin, scorpion toxin-like superfamily	TraesCS2B02G034500, TraesCS2D02G025300		TRITD2Bv1G007420					3.54127e-09	2.78611e-07	-1.2027	0.203699	57.9152	47.9905	47.0384	10.7155	16.0381	20.6821
TRITD5Bv1G253060	Pectinesterase inhibitor domain	TraesCS5B02G570900		TRITD5Bv1G253060					3.68138e-09	2.89089e-07	-1.58156	0.268155	75.0761	77.3521	49.1957	10.7959	21.3352	10.9142
TRITD7Av1G273290	Protein kinase domain	TraesCS7B02G459800, TraesCS7A02G540400, TraesCS7D02G526500, TraesCSU02G200200		TRITD7Av1G273290					3.7032e-09	2.89711e-07	-1.17125	0.198621	2.93504	2.68325	2.72422	1.22685	0.620599	0.8253
TRITD5Av1G133030	Oleosin	TraesCS5B02G181700, TraesCS5D02G188400		TRITD5Av1G133030					4.10552e-09	3.17023e-07	-3.4184	0.581372	1.44659	0.830085	1.82845	0	0.102434	0
TRITD4Bv1G010400	Oleosin			TRITD4Bv1G010400					4.16381e-09	3.20337e-07	-1.9924	0.338984	54.2835	34.2026	48.9149	4.36547	11.4745	4.6081
TRITD7Av1G131980	Nucleotidyl transferase domain	TraesCS7B02G183300, TraesCS7A02G287400, TraesCS7D02G284900	AT5G48300	TRITD7Av1G131980					4.39144e-09	3.34761e-07	-1.12237	0.191246	178.508	102.07	184.38	49.421	51.4169	46.3179
TRITD2Av1G053920	Sucrose synthase	TraesCS2A02G168200, TraesCS2D02G175600, TraesCS2B02G194200	AT3G43190, AT5G20830	TRITD2Av1G053920					4.5101e-09	3.43179e-07	-1.22074	0.208164	512.21	356.619	392.783	88.925	166.122	126.7
TRITD7Av1G251020	FBD domain	TraesCS7A02G473800, TraesCS7B02G375100		TRITD7Av1G251020					4.52679e-09	3.43821e-07	-3.54542	0.60464	0.32296	0.617592	0.490337	0	0	0
TRITD4Av1G256120	Ccc1 family	TraesCS4A02G457600		TRITD4Av1G256120					5.37896e-09	4.02678e-07	-1.05818	0.18135	2.10466	1.87564	1.38217	0.628703	0.735818	0.490182
TRITD7Av1G274690		TraesCS7A02G544500, TraesCS7A02G525314		TRITD7Av1G274690					5.78436e-09	4.31478e-07	-3.52389	0.60518	4.27598	2.29444	3.0422	0	0	0
TRITD5Bv1G210850	FAD/NAD(P)-binding domain superfamily	TraesCS5B02G423800, TraesCS5D02G430200, TraesCS5A02G421900	AT1G56000, AT1G55980	TRITD5Bv1G210850					6.93939e-09	5.10332e-07	-0.642844	0.110981	6.1049	6.32099	7.26226	3.12148	3.69448	3.56572
TRITD2Av1G083300	NUDIX hydrolase domain	TraesCS2A02G214200, TraesCS2B02G239200, TraesCS2D02G220000	AT5G16440, AT3G02780	TRITD2Av1G083300					7.00516e-09	5.14262e-07	-0.596808	0.103061	31.8277	31.2125	24.9246	14.3646	16.302	17.9137
TRITD5Bv1G239810	RNA recognition motif domain	TraesCS5B02G516400, TraesCS5D02G516500, TraesCS4A02G355700	AT3G26420	TRITD5Bv1G239810					7.39484e-09	5.40018e-07	-0.90345	0.15626	6.76414	9.67769	7.97699	3.05518	2.79501	4.06808
TRITD7Bv1G011660	SANT/Myb domain	TraesCS7B02G031000, TraesCS7A02G130700, TraesCS7D02G130100	AT5G55020, AT4G26930	TRITD7Bv1G011660	MYB	AT2G32460.1	3e-67	myb domain protein 101	7.97076e-09	5.77022e-07	-1.04123	0.180484	6.70489	4.12197	5.01038	1.51326	2.27075	1.77706
TRITD1Av1G193070	Basic-leucine zipper domain	TraesCS1D02G332200, TraesCS1B02G343500	AT4G02640, AT3G54620	TRITD1Av1G193070	bZIP	AT5G28770.2	3e-28	bZIP family protein	8.69802e-09	6.26408e-07	-2.48622	0.43206	9.86258	3.82336	9.82788	0.362167	1.04232	0.536906
TRITD2Av1G045690	NADH-ubiquinone oxidoreductase, 21kDa subunit, N-terminal	TraesCS2A02G154100, TraesCS2B02G179400, TraesCS2D02G159600	AT4G16450	TRITD2Av1G045690					8.92691e-09	6.3848e-07	-0.722837	0.125712	46.512	46.5903	33.5123	18.1374	21.7716	21.3312
TRITD1Av1G028060	Glutathione S-transferase, N-terminal	TraesCS1A02G078900, TraesCS1B02G097200, TraesCS1B02G097400, TraesCS1D02G081200	AT3G03190, AT5G17220	TRITD1Av1G028060					9.21343e-09	6.56721e-07	-0.881372	0.153426	7.08563	5.77221	5.81047	2.33722	2.68428	2.68661
TRITD3Av1G203320		TraesCS3A02G326700, TraesCS3B02G356000, TraesCS3D02G320000	AT5G54870, AT4G27020	TRITD3Av1G203320					9.37998e-09	6.67451e-07	-0.596124	0.103826	5.71018	6.54205	6.93411	3.90058	3.66525	3.0671
TRITD7Av1G055960	Cyanobacterial aminoacyl-tRNA synthetase, CAAD domain	TraesCS7A02G175800, TraesCS7D02G177200, TraesCS7B02G081000		TRITD7Av1G055960					9.50287e-09	6.73895e-07	-1.19179	0.207651	274.952	199.459	211.504	49.3544	93.1384	71.8613
TRITD6Bv1G015100	Neprosin	TraesCS6B02G067300, TraesCS6A02G050900, TraesCS2D02G102500		TRITD6Bv1G015100					1.15531e-08	7.98908e-07	-1.40805	0.246759	16.1114	12.8011	11.72	2.53794	5.21195	2.68159
TRITD7Av1G245140		TraesCS7D02G447800, TraesCS7A02G459900, TraesCS7B02G360700, TraesCS7B02G360500		TRITD7Av1G245140					1.22607e-08	8.34005e-07	-1.545	0.27124	6.91844	6.13651	5.02121	0.883052	1.72815	1.226
TRITD1Bv1G213600	Thionin	TraesCS1B02G426100, TraesCS1D02G405700, TraesCS1A02G398200, TraesCSU02G193300, TraesCSU02G219800		TRITD1Bv1G213600					1.24475e-08	8.42589e-07	-2.55254	0.448327	791.718	274.041	778.11	36.0425	76.0286	29.5732
TRITD4Bv1G137660	Thaumatin family	TraesCS4A02G070700, TraesCS4D02G227400	AT1G20030, AT4G36010, AT1G75800, AT2G17860, AT4G38670, AT4G18253	TRITD4Bv1G137660					1.27003e-08	8.56918e-07	-0.717527	0.126102	5.15999	5.33851	6.12337	3.05907	2.62951	2.44985
TRITD5Bv1G212660	Aldehyde oxidase/xanthine dehydrogenase, a/b hammerhead	TraesCS5B02G430100, TraesCS5D02G436200, TraesCS5A02G428200	AT1G04580, AT5G20960, AT1G02590, AT3G43600, AT2G27150	TRITD5Bv1G212660					1.41222e-08	9.46734e-07	-0.762661	0.134463	3.21966	4.03703	4.22183	1.97358	1.75942	1.62265
TRITD2Bv1G249150	Oxoglutarate/iron-dependent dioxygenase	TraesCS2B02G570800		TRITD2Bv1G249150					1.41915e-08	9.49852e-07	-1.72133	0.303529	11.563	4.83613	11.2534	1.26428	1.87547	1.50724
TRITD4Av1G118320	PAS domain	TraesCS4A02G164000, TraesCS4B02G157500	AT1G68050	TRITD4Av1G118320					1.64468e-08	1.0783e-06	-0.965546	0.171022	2.02182	1.89512	2.23092	0.777924	0.96117	0.627069
TRITD5Bv1G020930	Knottin, scorpion toxin-like superfamily	TraesCS5B02G051000		TRITD5Bv1G020930					1.71627e-08	1.12171e-06	-1.28168	0.227312	63.5155	43.0523	42.861	9.56143	18.3672	14.1387
TRITD5Av1G229230		TraesCS5A02G468500, TraesCS5D02G481400		TRITD5Av1G229230					1.71375e-08	1.12171e-06	-1.59599	0.283044	119.966	82.0565	107.26	12.3994	29.2457	24.5889
TRITD5Bv1G032970	Protein kinase domain	TraesCS5B02G075800, TraesCS5A02G069500, TraesCS5D02G081700	AT3G50500, AT5G66880	TRITD5Bv1G032970					1.72859e-08	1.12799e-06	-0.583449	0.1035	13.2494	10.1803	10.0544	5.94529	6.91933	5.80069
TRITD4Bv1G133180		TraesCS4B02G219600, TraesCS4A02G084600, TraesCS4D02G220000		TRITD4Bv1G133180					1.83028e-08	1.18877e-06	-0.731683	0.130023	13.006	14.8835	15.5999	8.13953	5.54677	7.52301
TRITD1Av1G111270	Tetratricopeptide-like helical domain superfamily	TraesCS1A02G172600, TraesCS1B02G191700, TraesCS1D02G166000		TRITD1Av1G111270					1.83992e-08	1.19317e-06	-1.05116	0.186826	10.3286	6.19433	8.11075	2.2555	3.41307	2.89307
TRITD2Av1G244420	Aromatic amino acid beta-eliminating lyase/threonine aldolase	TraesCS2A02G415800, TraesCS2D02G412800, TraesCS2B02G434800	AT1G08630, AT3G04520	TRITD2Av1G244420					1.84559e-08	1.19499e-06	-0.59233	0.105287	7.00248	7.4549	8.14528	4.04421	4.50101	3.99229
TRITD2Av1G291400	Cystatin domain	TraesCS2D02G589700, TraesCS2A02G578500, TraesCS2B02G609300		TRITD2Av1G291400					1.99961e-08	1.28672e-06	-1.50206	0.267649	113.722	91.1707	92.8194	13.1941	28.6465	28.478
TRITD7Av1G261750	Aspartic peptidase A1 family	TraesCS7B02G409500, TraesCS7B02G409800, TraesCS7D02G489900, TraesCSU02G217000		TRITD7Av1G261750					2.21081e-08	1.40528e-06	-2.16629	0.387208	5.84817	4.51561	4.57977	0.267338	1.01268	0.637232
TRITD3Bv1G264710	Neprosin	TraesCS3B02G548800, TraesCS3D02G494700		TRITD3Bv1G264710					2.38044e-08	1.49712e-06	-1.14472	0.205081	6.91733	6.18101	4.30795	1.91796	2.26554	1.36678
TRITD6Av1G214650	Aspartic peptidase A1 family	TraesCS6A02G372500, TraesCS6B02G410400, TraesCS6D02G356600	AT4G04460, AT1G62290, AT1G11910	TRITD6Av1G214650					2.44155e-08	1.52864e-06	-2.68844	0.482024	26.3546	6.06396	24.7711	1.14403	1.16275	0.924757
TRITD6Av1G081570	Cytochrome P450	TraesCS6A02G180400, TraesCS6B02G205100, TraesCS6D02G164800		TRITD6Av1G081570					2.57348e-08	1.60883e-06	-0.997634	0.179165	138.381	108.905	104.119	31.9749	54.8096	45.6019
TRITD3Av1G147450	ATP-dependent RNA helicase DEAD-box, conserved site	TraesCS3A02G222500, TraesCS3D02G230300, TraesCS3B02G252700	AT5G08620, AT5G08610, AT5G63630	TRITD3Av1G147450					2.60785e-08	1.62544e-06	-0.64492	0.11587	8.65956	9.11658	10.7717	5.99379	4.36595	4.75487
TRITD4Bv1G019100	Helicase, C-terminal	TraesCS4B02G058900, TraesCS4A02G255900, TraesCS4D02G058800	AT4G34910	TRITD4Bv1G019100					2.76592e-08	1.71663e-06	-0.589795	0.106161	7.55526	7.06891	7.91951	5.10393	3.83607	3.73101
TRITD2Bv1G039760	Aspartic peptidase A1 family	TraesCS2B02G131100, TraesCS2D02G112800, TraesCSU02G217000		TRITD2Bv1G039760					2.87453e-08	1.77574e-06	-1.45622	0.262434	170.518	122.339	123.251	23.3691	51.5465	27.456
TRITD1Bv1G101870	Pleckstrin homology domain	TraesCS1B02G173600, TraesCS1A02G156500, TraesCS1D02G155000	AT3G54800, AT2G28320	TRITD1Bv1G101870					2.97564e-08	1.82737e-06	-0.60474	0.109102	6.11548	5.91901	6.82234	3.52476	3.6009	3.20986
TRITD7Bv1G000850	Major intrinsic protein	TraesCS7B02G003800, TraesCS5D02G548900		TRITD7Bv1G000850					3.30476e-08	2.01171e-06	-1.4095	0.255137	2.25046	2.65008	1.70533	0.354204	0.542191	0.716603
TRITD6Av1G012250	F-box domain	TraesCS6A02G057200, TraesCS6B02G075100		TRITD6Av1G012250					3.35112e-08	2.03399e-06	-3.251	0.588734	0.624561	0.545634	0.349766	0	0	0.0295014
TRITD6Av1G014670	Histone H4	TraesCS6B02G078400		TRITD6Av1G014670					3.63332e-08	2.18303e-06	-0.945399	0.171647	25.7319	22.2645	17.2279	8.24718	7.7652	8.93048
TRITD1Av1G230760	CCT domain	TraesCS1A02G444400, TraesCS1B02G479000	AT5G53420, AT4G27900	TRITD1Av1G230760					3.7964e-08	2.2647e-06	-1.17077	0.212865	2.99686	2.31196	2.594	0.677795	0.77064	0.980578
TRITD1Av1G194480	FCP1 homology domain	TraesCS1A02G332900, TraesCS1B02G346500, TraesCS1D02G335700	AT1G55900	TRITD1Av1G194480					4.23453e-08	2.50456e-06	-0.680506	0.124162	4.80558	4.36279	5.6709	2.74431	2.18329	2.59497
TRITD5Av1G246290	Major intrinsic protein	TraesCS5A02G518300, TraesCS4D02G344300, TraesCS4B02G349500	AT2G25810	TRITD5Av1G246290					4.27851e-08	2.52699e-06	-2.23827	0.408522	4.73218	4.94061	4.31684	0.323029	0.724924	0.396586
TRITD2Bv1G237590	Glycoside hydrolase family 10 domain	TraesCS2B02G537100, TraesCS2D02G510500	AT4G33830, AT4G33860, AT4G33840	TRITD2Bv1G237590					4.77879e-08	2.77529e-06	-1.01196	0.185363	2.1817	1.71849	2.05901	0.55771	1.00758	0.65342
TRITD5Bv1G148130	EF-hand domain	TraesCS5B02G260800, TraesCS5D02G270000, TraesCS5A02G262400		TRITD5Bv1G148130					4.89532e-08	2.83114e-06	-1.19827	0.219662	7.97288	5.45382	7.25622	1.62958	2.14609	2.38962
TRITD5Bv1G199110	YTH domain	TraesCS5B02G391500, TraesCS5D02G396400, TraesCS5A02G386600	AT3G03950, AT1G55500, AT5G61020, AT3G13460	TRITD5Bv1G199110					5.08439e-08	2.92197e-06	-0.593483	0.108929	23.3682	17.3577	17.5556	10.3382	11.8289	9.96221
TRITD3Bv1G131400	ATP-dependent RNA helicase DEAD-box, conserved site	TraesCS3B02G252600, TraesCS3A02G222700, TraesCS3D02G230400	AT5G08620, AT5G08610, AT5G63630	TRITD3Bv1G131400					5.09443e-08	2.92197e-06	-0.733863	0.134704	7.35461	7.88474	9.08185	4.51939	3.07999	4.23075
TRITD3Bv1G267850		TraesCS3B02G560100		TRITD3Bv1G267850					5.27513e-08	3.01318e-06	-1.54341	0.283623	30.3353	20.1435	18.5512	3.18292	7.39595	4.62333
TRITD6Av1G041960	Integrase, catalytic core			TRITD6Av1G041960					5.34551e-08	3.03675e-06	-0.852132	0.156659	1.4119	1.14045	1.11661	0.564906	0.626324	0.394886
TRITD5Bv1G159140	Ribulose-phosphate 3-epimerase-like	TraesCS5B02G284600, TraesCS5A02G285400, TraesCS5D02G292800	AT3G01850, AT1G63290	TRITD5Bv1G159140					5.45807e-08	3.09226e-06	-0.714572	0.131459	8.91304	7.64217	6.46642	3.38982	3.64912	4.20035
TRITD5Av1G113970	Ferritin	TraesCS5A02G152400, TraesCS5D02G157600, TraesCS5B02G151000	AT2G40300, AT3G56090, AT3G11050	TRITD5Av1G113970					5.86912e-08	3.27528e-06	-0.645198	0.11898	95.826	112.909	107.853	57.8999	45.4893	65.0348
TRITD4Bv1G024040	DNA-directed RNA polymerase III subunit RPC4	TraesCS4B02G071600, TraesCS4A02G243400, TraesCS4D02G070300		TRITD4Bv1G024040					6.08896e-08	3.37181e-06	-1.20026	0.221607	4.99768	5.05992	6.54467	2.02031	2.03764	1.08472
TRITD5Av1G224560	Phosphatidic acid phosphatase type 2/haloperoxidase	TraesCS5A02G455100, TraesCS5D02G465500, TraesCS5B02G463900	AT3G58490	TRITD5Av1G224560					6.16774e-08	3.40639e-06	-0.607166	0.11215	4.68332	4.77003	5.04643	2.70349	2.8352	2.40209
TRITD5Av1G234260	Protein KTI12/L-seryl-tRNA(Sec) kinase	TraesCS5A02G483800, TraesCS5D02G497400, TraesCS5B02G497100	AT1G13870	TRITD5Av1G234260					6.57369e-08	3.59724e-06	-0.611209	0.113136	10.2611	11.7286	10.2035	5.95905	4.85654	6.86349
TRITD2Av1G223060	Proteinase inhibitor I3, Kunitz legume	TraesCS2A02G375400, TraesCS2D02G371800, TraesCS2B02G392500		TRITD2Av1G223060					7.58195e-08	4.03255e-06	-1.47652	0.27461	61.8409	38.6669	47.9907	7.48559	17.2746	10.6959
TRITD7Bv1G140480	Transcription factor CBF/NF-Y/archaeal histone domain	TraesCS7B02G248300, TraesCS7A02G336700, TraesCS7D02G344400	AT5G50490, AT5G50470, AT5G27910, AT5G50480, AT5G38140	TRITD7Bv1G140480	NF-YC	AT1G56170.1	4e-22	nuclear factor Y, subunit C2	8.61793e-08	4.51445e-06	-1.24696	0.232916	92.423	60.2003	71.8889	14.4281	28.0414	23.8092
TRITD0Uv1G049670	Aspartic peptidase A1 family	TraesCS5B02G119900, TraesCS5A02G113400, TraesCS5D02G128800	AT1G77480, AT1G44130, AT4G33490	TRITD0Uv1G049670					1.07245e-07	5.42051e-06	-0.609725	0.114739	4.85413	4.77098	4.38234	2.82018	2.61629	2.22768
TRITD7Av1G017430		TraesCS7D02G061800		TRITD7Av1G017430					1.15611e-07	5.78025e-06	-3.03051	0.571761	0.881278	0.576612	0.545324	0.0282917	0	0.0395502
TRITD7Bv1G000430	Pectinesterase inhibitor domain	TraesCS5D02G561800		TRITD7Bv1G000430					1.17019e-07	5.84368e-06	-1.71994	0.324634	30.8909	29.2309	20.0826	3.40414	8.51899	3.58156
TRITD6Bv1G223840	Leucine-rich repeat domain superfamily	TraesCS6B02G453000, TraesCS6D02G391700		TRITD6Bv1G223840					1.25827e-07	6.24611e-06	-3.37249	0.638146	0.332849	0.35279	0.379351	0	0	0
TRITD3Av1G082020		TraesCS3A02G175100		TRITD3Av1G082020					1.27933e-07	6.32807e-06	-0.937981	0.177588	10.7438	11.1916	7.36223	3.91388	3.76153	3.56714
TRITD3Bv1G032400	Cereal seed allergen/trypsin and alpha-amylase inhibitor, conserved site	TraesCS3B02G111100, TraesCS3D02G096000, TraesCS3D02G095700, TraesCS3A02G095600		TRITD3Bv1G032400					1.45302e-07	7.07806e-06	-3.4653	0.659	441.313	58.4673	331.927	7.21854	8.50418	4.25169
TRITD2Bv1G226730	Cystatin domain	TraesCS2B02G502300, TraesCS2B02G502600, TraesCS2D02G477600		TRITD2Bv1G226730					1.45577e-07	7.08277e-06	-1.07237	0.203948	205.521	210.106	148.952	45.8453	74.5286	76.7968
TRITD6Av1G076230	Mitochondrial carrier protein	TraesCS6A02G175100, TraesCS6D02G168200, TraesCS6B02G210000	AT4G32400	TRITD6Av1G076230					1.46394e-07	7.10635e-06	-1.76136	0.335047	127.563	84.4549	96.8928	10.4867	31.1183	16.4552
TRITD1Av1G013580	Glycoside hydrolase family 17	TraesCS1A02G049800, TraesCS1D02G056500, TraesCS1B02G072500, TraesCS1B02G072600	AT1G32860, AT5G42100	TRITD1Av1G013580					1.49682e-07	7.24063e-06	-0.760273	0.144733	10.3224	11.4042	10.2091	5.54354	5.16611	4.32963
TRITD2Av1G028210	PA domain	TraesCS2A02G105500, TraesCS2D02G105100, TraesCS2B02G122400	AT2G30290, AT3G52850	TRITD2Av1G028210					1.65294e-07	7.85014e-06	-1.41595	0.270495	14.901	7.4024	15.1068	2.29525	3.73244	2.80561
TRITD7Bv1G218460	Bifunctional inhibitor/plant lipid transfer protein/seed storage helical domain	TraesCS7B02G431200, TraesCS7D02G504800		TRITD7Bv1G218460					1.68554e-07	7.98679e-06	-2.98996	0.57158	11.1221	2.37088	11.9456	0.167666	0.37725	0.412824
TRITD7Av1G226350	Knottin, scorpion toxin-like superfamily	TraesCS7B02G319300, TraesCS7D02G411700		TRITD7Av1G226350					1.71624e-07	8.10464e-06	-2.13209	0.407845	78.9393	34.1426	84.8624	4.65873	12.4936	6.2908
TRITD2Av1G043640	Six-bladed beta-propeller, TolB-like	TraesCS2D02G154500, TraesCS2B02G174500	AT4G01870	TRITD2Av1G043640					1.72504e-07	8.11857e-06	-2.95189	0.564764	0.654173	0.408648	0.292093	0.0171858	0	0.0432286
TRITD1Bv1G219610	Rad21/Rec8-like protein, C-terminal, eukaryotic	TraesCS1B02G450400, TraesCS1D02G427800, TraesCS1A02G420000	AT5G05490	TRITD1Bv1G219610					1.755e-07	8.23173e-06	-0.661063	0.126554	2.33705	2.41226	2.98219	1.24682	1.5209	1.22796
TRITD3Av1G003290	Phosphatidylethanolamine-binding protein	TraesCS3A02G006600, TraesCS3B02G007400, TraesCS3B02G010100, TraesCS3D02G004100	AT1G18100	TRITD3Av1G003290					1.75806e-07	8.23681e-06	-2.88325	0.552003	2.00794	1.38672	2.10314	0.202456	0	0.0833011
TRITD6Bv1G155540	Glycoside hydrolase family 16	TraesCS6B02G293500, TraesCS6D02G248500, TraesCS6A02G266100	AT4G18990, AT1G32170	TRITD6Bv1G155540					1.78397e-07	8.33945e-06	-0.657644	0.125972	5.00194	5.4665	5.0341	3.05403	2.47786	2.54897
TRITD3Av1G255720	Oxoglutarate/iron-dependent dioxygenase	TraesCS3A02G457700, TraesCS3B02G497900, TraesCS3D02G450500	AT3G21420	TRITD3Av1G255720					1.86737e-07	8.67101e-06	-0.611041	0.117236	5.79199	6.18179	6.68834	3.22874	3.26531	3.66751
TRITD4Bv1G009290	Domain of unknown function DUF1618	TraesCS4B02G032700, TraesCS4B02G032600, TraesCS4D02G030300, TraesCS4A02G279700		TRITD4Bv1G009290					1.89246e-07	8.75823e-06	-1.62332	0.311602	6.01673	4.98503	5.57615	0.597941	1.73507	1.21896
TRITD2Av1G293140	Plant peroxidase	TraesCS2A02G571500, TraesCS2B02G615700, TraesCS2D02G583100		TRITD2Av1G293140					1.91616e-07	8.82873e-06	-1.38257	0.265506	2.28502	2.66706	2.24193	0.350334	0.867612	0.669532
TRITD5Av1G088310		TraesCS5A02G116200		TRITD5Av1G088310					1.98314e-07	9.08712e-06	-0.92686	0.178211	26.7714	34.433	21.4757	11.2653	11.7934	9.08607
TRITD0Uv1G059130	Pectinesterase inhibitor domain	TraesCS7A02G038200, TraesCSU02G101900		TRITD0Uv1G059130					1.9815e-07	9.08712e-06	-1.40608	0.270346	59.7886	47.0436	36.1769	8.20867	17.8252	10.3547
TRITD4Av1G029160		TraesCS4A02G075100, TraesCS4D02G232500, TraesCS4B02G231000		TRITD4Av1G029160					2.09369e-07	9.52046e-06	-1.94527	0.374752	25.7135	17.0262	19.0523	1.96358	5.92144	2.06199
TRITD2Av1G204960	NAC domain	TraesCS2A02G326600, TraesCS2D02G336300, TraesCS2B02G355300	AT3G01600, AT5G14490	TRITD2Av1G204960	NAC	AT5G56620.1	8e-56	NAC domain containing protein 99	2.15807e-07	9.79185e-06	-0.869199	0.167631	8.61217	6.50266	5.81666	2.59873	3.69842	2.51856
TRITD3Av1G047210	Glutathione S-transferase, N-terminal	TraesCS3A02G309100, TraesCS3B02G152200, TraesCS3B02G152300	AT3G03190, AT5G17220	TRITD3Av1G047210					2.37281e-07	1.06848e-05	-1.00809	0.195083	5.09095	5.49724	4.80991	2.03136	1.48473	2.13916
TRITD7Bv1G083500		TraesCS7B02G164800		TRITD7Bv1G083500					2.39083e-07	1.07312e-05	-0.679055	0.131445	11.0453	10.4293	10.3598	4.79021	4.74445	6.89302
TRITD5Bv1G152670	NAD-dependent epimerase/dehydratase	TraesCS5B02G268700, TraesCS5D02G276500, TraesCS5A02G268700	AT1G76470	TRITD5Bv1G152670					2.49564e-07	1.11656e-05	-0.792982	0.153737	4.26694	3.36287	3.6599	1.6245	2.0853	1.4355
TRITD4Av1G183260	Cereal seed allergen/trypsin and alpha-amylase inhibitor, conserved site	TraesCS4A02G248000, TraesCS4D02G065900, TraesCS4B02G066900		TRITD4Av1G183260					2.53045e-07	1.1285e-05	-2.49316	0.483598	18.9079	13.453	19.6377	1.09029	3.47207	0.670452
TRITD5Bv1G113490	ABC transporter-like	TraesCS5B02G183500, TraesCS5A02G185500, TraesCS5D02G190600		TRITD5Bv1G113490					2.82731e-07	1.24491e-05	-0.631541	0.122997	4.26169	3.97089	3.71779	2.1948	2.36006	1.8474
TRITD1Bv1G056390	MATH/TRAF domain	TraesCS1A02G108500		TRITD1Bv1G056390					2.91246e-07	1.2797e-05	-0.656508	0.127999	149.881	164.318	175.304	90.8212	67.5455	99.8271
TRITD1Av1G207070	Aldose 1-/Glucose-6-phosphate 1-epimerase	TraesCS1A02G409900, TraesCS1B02G439900, TraesCS1D02G417300	AT3G61610, AT4G23730	TRITD1Av1G207070					2.92905e-07	1.28429e-05	-0.6172	0.12036	10.6213	8.67156	9.47595	4.17737	5.89685	5.62362
TRITD0Uv1G050850	Proton-dependent oligopeptide transporter family	TraesCS5B02G498700, TraesCS5D02G498700, TraesCS5A02G485300, TraesCS5A02G485200	AT2G38100	TRITD0Uv1G050850					3.67156e-07	1.56381e-05	-1.25636	0.24706	8.36306	6.69279	6.26583	1.40205	3.12448	1.85748
TRITD4Bv1G036640	Heavy metal-associated domain, HMA	TraesCS4B02G097900, TraesCS4D02G094100, TraesCS4A02G219400	AT3G02960, AT5G50740, AT5G63530	TRITD4Bv1G036640					3.89299e-07	1.65305e-05	-2.29008	0.451326	8.60174	5.71859	9.93147	0.39893	1.7517	0.694074
TRITD5Av1G135280	Proton pump-interactor	TraesCS5A02G186800, TraesCS5B02G185200, TraesCS5D02G192100	AT4G27500, AT5G36780, AT5G36690, AT3G15340	TRITD5Av1G135280					3.90277e-07	1.65552e-05	-0.781756	0.154082	50.2567	34.8136	38.6222	15.1407	22.157	19.5959
TRITD7Av1G006130	Pectinesterase inhibitor domain	TraesCS7A02G028900		TRITD7Av1G006130					3.9818e-07	1.68561e-05	-1.70358	0.336023	55.5902	39.6866	39.0174	5.70611	15.2335	6.01627
TRITD7Av1G006140	Pectinesterase inhibitor domain	TraesCS7A02G028900		TRITD7Av1G006140					3.9818e-07	1.68561e-05	-1.70358	0.336023	55.5902	39.6866	39.0174	5.70611	15.2335	6.01627
TRITD0Uv1G033050	Gliadin/LMW glutenin	TraesCS4A02G453400, TraesCS7D02G032100		TRITD0Uv1G033050					4.12183e-07	1.74136e-05	-3.2395	0.639806	264.902	42.7857	300.046	7.32446	6.17407	4.51962
TRITD3Av1G262020	HAT, C-terminal dimerisation domain			TRITD3Av1G262020					4.34009e-07	1.81518e-05	-1.21728	0.240883	2.34517	2.32067	2.23712	0.590982	0.895267	0.569647
TRITD4Bv1G019310	Glutathione S-transferase, N-terminal	TraesCS4B02G059300, TraesCS3D02G133200, TraesCS3D02G133100	AT3G03190, AT5G17220	TRITD4Bv1G019310					4.50414e-07	1.87626e-05	-2.37278	0.470201	3.03747	1.6743	2.32989	0.166937	0.125994	0.306465
TRITD2Av1G015060	Expansin/pollen allergen, DPBB domain	TraesCS2A02G066600, TraesCS2D02G065000, TraesCS2B02G078800	AT1G20190	TRITD2Av1G015060					4.55303e-07	1.89218e-05	-1.23895	0.245616	2.58172	2.70721	2.81015	0.805978	0.539235	1.03445
TRITD3Bv1G044270	Polyribonucleotide 5'-hydroxyl-kinase Clp1, P-loop domain	TraesCS3B02G130200, TraesCS3D02G115500, TraesCS3A02G113200	AT5G11010	TRITD3Bv1G044270					4.63002e-07	1.91911e-05	-0.583034	0.115657	5.45346	4.71183	5.60467	3.12575	3.1	2.60927
TRITD7Bv1G032520	Cyanobacterial aminoacyl-tRNA synthetase, CAAD domain	TraesCS7B02G081000, TraesCS7D02G177200, TraesCS7A02G175800		TRITD7Bv1G032520					4.6463e-07	1.92278e-05	-0.997159	0.197834	550.394	446.029	389.49	122.19	216.2	184.996
TRITD2Av1G066050	Helix-turn-helix motif	TraesCS2A02G188500, TraesCS2D02G199200, TraesCS2B02G218800	AT2G18550, AT5G66700, AT4G36740	TRITD2Av1G066050	HD-ZIP	AT4G36740.1	3e-44	homeobox protein 40	4.64946e-07	1.92278e-05	-4.74645	0.941711	22.5699	2.53425	1.17845	0.045244	0	0
TRITD3Bv1G077740		TraesCS3B02G071000, TraesCS3D02G059000		TRITD3Bv1G077740					4.6646e-07	1.92579e-05	-1.20149	0.23841	91.1359	55.522	68.6373	14.5075	27.1117	24.3066
TRITD6Av1G223090	Major intrinsic protein	TraesCS6A02G405700		TRITD6Av1G223090					4.69889e-07	1.93385e-05	-3.27903	0.65083	0.39713	1.49454	0.565519	0	0	0
TRITD2Av1G292190	Cystatin domain	TraesCS2A02G575600, TraesCS2D02G586300, TraesCS3B02G077600		TRITD2Av1G292190					4.85494e-07	1.9945e-05	-1.19511	0.237504	120.42	131.668	91.3657	23.8259	48.9398	35.0037
TRITD3Av1G220740	Basic-leucine zipper domain	TraesCS3A02G371800, TraesCS3B02G404300, TraesCS3B02G404500, TraesCS3B02G404200, TraesCS3B02G404400, TraesCS3D02G364900	AT2G36270	TRITD3Av1G220740	bZIP	AT2G36270.1	9e-56	bZIP family protein	5.15609e-07	2.09755e-05	-1.25618	0.250214	9.07789	7.52253	8.09553	1.5487	3.65324	2.26054
TRITD5Av1G217620	Glutamate/phenylalanine/leucine/valine dehydrogenase	TraesCS5A02G434100, TraesCS5D02G442000, TraesCS5B02G437100	AT5G18170, AT3G03910	TRITD5Av1G217620					5.1646e-07	2.09896e-05	-0.813555	0.16206	2.99337	2.72594	3.08362	1.19487	1.12864	1.62131
TRITD5Bv1G000590	Bifunctional inhibitor/plant lipid transfer protein/seed storage helical domain	TraesCS5B02G003500, TraesCS5D02G004000, TraesCS5A02G003300		TRITD5Bv1G000590					5.38252e-07	2.17692e-05	-4.20244	0.83845	209.363	17.4573	206.66	1.84533	0.998169	1.27442
TRITD6Bv1G009200	Oxoglutarate/iron-dependent dioxygenase	TraesCS6B02G046800, TraesCS6D02G038500, TraesCS6A02G033300		TRITD6Bv1G009200					5.76196e-07	2.30136e-05	-1.78537	0.357143	1.72267	0.826477	1.62247	0.231257	0.274449	0.143642
TRITD3Av1G183900	Zinc finger, PARP-type	TraesCS3A02G278700, TraesCS3B02G312900, TraesCS3D02G279000	AT3G14890	TRITD3Av1G183900					6.1505e-07	2.44019e-05	-0.804981	0.161434	1.69122	2.29248	2.69691	0.909291	0.995386	1.02884
TRITD3Av1G273310	Protein of unknown function DUF597	TraesCS3A02G497600, TraesCS3D02G505200, TraesCS3B02G560400	AT2G27930	TRITD3Av1G273310					6.19193e-07	2.45196e-05	-1.25204	0.251155	64.7463	40.2511	55.527	9.88052	18.8682	18.3823
TRITD2Av1G287290	PB1 domain	TraesCS2A02G592700, TraesCS2B02G591500, TraesCS2D02G561800		TRITD2Av1G287290					6.33932e-07	2.49846e-05	-0.623013	0.125088	13.0117	12.3392	13.6051	6.95282	7.88532	6.20632
TRITD6Bv1G082890	Cytochrome P450	TraesCS6B02G205100, TraesCS6D02G164800, TraesCS6A02G180400		TRITD6Bv1G082890					6.55486e-07	2.56884e-05	-1.10986	0.223126	164.137	128.067	119.77	30.3117	59.4749	50.7945
TRITD5Bv1G247210	3-beta hydroxysteroid dehydrogenase/isomerase	TraesCS5B02G546700, TraesCS5D02G541100, TraesCS4A02G331600	AT1G09480, AT1G51410, AT1G09500, AT5G19440, AT1G09510, AT1G66800, AT1G09490	TRITD5Bv1G247210					6.62164e-07	2.59257e-05	-2.89833	0.582914	0.959333	1.35469	0.770678	0.0496062	0	0.0608064
TRITD2Bv1G012450		TraesCS2B02G052000, TraesCS7A02G274700		TRITD2Bv1G012450					6.82756e-07	2.64833e-05	-0.87369	0.175927	4.50572	3.23803	4.00396	1.50289	1.32477	2.11508
TRITD2Bv1G065410	Sucrose synthase	TraesCS2B02G194200, TraesCS2A02G168200, TraesCS2D02G175600	AT3G43190, AT5G20830	TRITD2Bv1G065410					6.90107e-07	2.67344e-05	-0.95405	0.192189	512.362	373.437	376.15	118.139	206.445	171.343
TRITD5Bv1G136110	Protein of unknown function DUF3128	TraesCS5B02G230300, TraesCS5D02G236000, TraesCS5A02G232000		TRITD5Bv1G136110					7.49851e-07	2.87383e-05	-0.632484	0.127827	18.3285	23.4193	21.1427	12.7331	9.55698	11.2981
TRITD7Bv1G193780	Bifunctional inhibitor/plant lipid transfer protein/seed storage helical domain	TraesCS7B02G361700, TraesCS7A02G460300, TraesCS7D02G449200		TRITD7Bv1G193780					7.82483e-07	2.97701e-05	-1.59897	0.323698	56.9605	39.3488	38.695	5.67544	15.8037	8.00105
TRITD6Bv1G000900	NB-ARC	TraesCS6B02G000200, TraesCSU02G243100		TRITD6Bv1G000900					7.87351e-07	2.99279e-05	-3.25917	0.659955	0.618858	0.389973	0.539717	0	0	0
TRITD7Av1G196290	Multicopper oxidase, type 1	TraesCS7A02G361800, TraesCS7B02G265300, TraesCS7D02G361200	AT5G21100, AT5G21105	TRITD7Av1G196290					8.16983e-07	3.09415e-05	-1.95306	0.396057	1.34858	0.621854	1.23362	0.0864471	0.262312	0.11208
TRITD6Bv1G158820	Cytochrome P450	TraesCS6B02G298500, TraesCS6D02G243800, TraesCS6A02G271300	AT4G19230, AT5G45340	TRITD6Bv1G158820					8.54005e-07	3.21683e-05	-0.755188	0.153412	2.80795	2.43858	2.33477	1.25757	1.07882	1.22427
TRITD4Av1G009800				TRITD4Av1G009800					8.846e-07	3.31114e-05	-1.78846	0.363825	26.2566	11.5813	24.6247	2.76078	5.44294	2.34104
TRITD7Bv1G093200	Nucleotidyl transferase domain	TraesCS7B02G183300, TraesCS7A02G287400, TraesCS7D02G284900	AT5G48300	TRITD7Bv1G093200					8.92036e-07	3.33299e-05	-0.963942	0.196159	145.548	79.649	140.567	45.0834	48.2825	42.1868
TRITD7Av1G250710	BTB/POZ domain	TraesCS7A02G472800, TraesCS7B02G373600		TRITD7Av1G250710					9.17319e-07	3.40455e-05	-1.92669	0.392514	1.05256	0.541693	0.678462	0.0746517	0.169876	0.0708776
TRITD4Av1G218710	Aspartic peptidase A1 family	TraesCS1A02G407300, TraesCS7D02G489700, TraesCS5B02G530200		TRITD4Av1G218710					9.30028e-07	3.43873e-05	-1.44777	0.295108	28.8912	22.7805	16.9605	3.73833	8.63594	4.4466
TRITD2Bv1G261200	Cystatin domain	TraesCS2B02G609300, TraesCS2D02G589700, TraesCS2A02G581500, TraesCS2A02G578500		TRITD2Bv1G261200					1.0365e-06	3.74523e-05	-1.09888	0.22497	138.3	124.581	107.913	27.0169	50.5066	51.277
TRITD6Bv1G228000	Homeobox domain	TraesCS6B02G467400, TraesCS6A02G420900, TraesCS1A02G004600, TraesCS6D02G404900		TRITD6Bv1G228000	HB-other	AT3G18380.1	3e-61	sequence-specific DNA binding transcription factors;sequence-specific DNA binding	1.06576e-06	3.82773e-05	-0.816065	0.167258	19.2064	15.4415	15.8837	5.49003	9.11535	8.23875
TRITD5Av1G214770	Armadillo-like helical	TraesCS5A02G423100, TraesCS5D02G431400, TraesCS5B02G425000	AT3G20800, AT2G32550, AT5G12980	TRITD5Av1G214770					1.07817e-06	3.86564e-05	-0.639554	0.131142	71.7311	53.5762	58.3879	26.3185	35.7852	35.5341
TRITD5Av1G000200	Bifunctional inhibitor/plant lipid transfer protein/seed storage helical domain	TraesCS5A02G003300, TraesCS5D02G004000, TraesCS5B02G003500		TRITD5Av1G000200					1.10539e-06	3.94289e-05	-3.49123	0.716607	310.918	34.9146	290.781	4.79787	4.82448	3.82326
TRITD2Av1G003050	CCR4-NOT transcription complex subunit 9	TraesCS2A02G012800, TraesCS2D02G013600, TraesCS2B02G005100	AT1G66510	TRITD2Av1G003050					1.22525e-06	4.31274e-05	-0.807612	0.166466	43.9676	27.2684	35.9014	12.9592	17.8286	16.7668
TRITD4Av1G024890	Chlorophyll A-B binding protein	TraesCS4A02G063600, TraesCS4B02G240700, TraesCS4D02G240400		TRITD4Av1G024890					1.22562e-06	4.31274e-05	-2.04545	0.421616	5.30454	2.33235	2.78793	0.200332	0.403735	0.699714
TRITD5Av1G257890		TraesCS5A02G556700, TraesCS4B02G391000, TraesCS4B02G395300, TraesCS4B02G395100		TRITD5Av1G257890					1.22825e-06	4.31833e-05	-0.596255	0.122913	10.7517	9.41998	9.19254	4.96305	5.24855	6.03027
TRITD5Av1G078890	Aspartic peptidase A1 family	TraesCS5A02G113400, TraesCS5B02G119900, TraesCS5D02G128800	AT1G77480, AT1G44130, AT4G33490	TRITD5Av1G078890					1.23196e-06	4.32774e-05	-0.80889	0.166767	2.36426	2.35854	2.32754	1.19642	0.763305	1.24717
TRITD7Bv1G150120	Protein of unknown function DUF761, plant	TraesCS7B02G266700, TraesCS7D02G361900, TraesCS7A02G361200		TRITD7Bv1G150120					1.25183e-06	4.39016e-05	-1.49977	0.309406	7.96954	4.25571	6.19783	0.796681	1.90156	1.49391
TRITD3Bv1G199400	RmlC-like cupin domain superfamily	TraesCS3B02G384600, TraesCS3A02G352000		TRITD3Bv1G199400					1.25481e-06	4.39688e-05	-1.26632	0.26127	2.68539	4.27598	3.05636	0.870713	0.715269	1.17896
TRITD1Av1G225900	Neprosin	TraesCS1A02G430600, TraesCS5D02G453400, TraesCS5B02G450500		TRITD1Av1G225900					1.29708e-06	4.52087e-05	-1.48702	0.307224	1.95594	1.47074	1.29867	0.213397	0.403266	0.441314
TRITD4Av1G215590	Membrane insertase YidC/ALB3/OXA1/COX18	TraesCS4A02G341100, TraesCS5B02G533400, TraesCS5D02G531600	AT1G24490	TRITD4Av1G215590					1.29778e-06	4.52087e-05	-2.4248	0.500982	1.25848	1.18349	0.927232	0.151547	0.0653978	0.0587977
TRITD2Av1G257910	Solute-binding protein family 3/N-terminal domain of MltF	TraesCS2A02G455200, TraesCS2D02G455600, TraesCS2B02G477300	AT1G42540, AT4G35290, AT3G51480, AT2G17260	TRITD2Av1G257910					1.31767e-06	4.57487e-05	-0.705081	0.145766	1.4659	1.60807	1.61869	0.734432	0.687969	0.910283
TRITD5Av1G137200		TraesCS5A02G195200, TraesCS5D02G198400, TraesCS5B02G190500, TraesCS5B02G192200		TRITD5Av1G137200					1.31979e-06	4.57841e-05	-1.23893	0.256149	9.29922	7.6217	5.54021	1.45408	3.05042	2.03954
TRITD0Uv1G140410	Protein of unknown function DUF538	TraesCSU02G068000, TraesCS4D02G143300, TraesCS4A02G171900	AT1G56580, AT1G09310	TRITD0Uv1G140410					1.3586e-06	4.68875e-05	-0.654626	0.135506	11.2096	8.75438	9.49874	4.82662	4.30024	6.34359
TRITD7Bv1G218860	Calcineurin-like phosphoesterase domain, ApaH type	TraesCS7B02G434000	AT5G34850	TRITD7Bv1G218860					1.3857e-06	4.76347e-05	-1.98577	0.411384	18.8627	6.42775	17.2897	1.32091	2.78276	1.47432
TRITD0Uv1G016050		TraesCS2B02G505800, TraesCS2D02G480300		TRITD0Uv1G016050					1.42564e-06	4.88064e-05	-0.887865	0.184151	2.53105	3.01642	4.05375	1.26833	1.05278	1.61553
TRITD0Uv1G106040		TraesCS2B02G505800, TraesCS2D02G480300		TRITD0Uv1G106040					1.42564e-06	4.88064e-05	-0.887865	0.184151	2.53105	3.01642	4.05375	1.26833	1.05278	1.61553
TRITD6Bv1G059030	GDSL lipase/esterase	TraesCS6B02G166000, TraesCS6D02G126500		TRITD6Bv1G059030					1.5671e-06	5.31258e-05	-1.22105	0.254255	33.3996	35.2061	25.3387	5.75866	11.8593	11.3339
TRITD5Av1G166470	Oxoglutarate/iron-dependent dioxygenase	TraesCS5A02G283100, TraesCS6D02G138200, TraesCS5B02G282100	AT1G49390, AT5G20400	TRITD5Av1G166470					1.61674e-06	5.46311e-05	-2.3671	0.493534	12.0107	8.19743	11.7835	0.407746	2.22403	1.00889
TRITD3Av1G001040	Proteinase inhibitor I12, Bowman-Birk	TraesCS3D02G025700, TraesCS3B02G038700		TRITD3Av1G001040					1.62627e-06	5.49087e-05	-2.73095	0.569535	93.0119	18.6996	80.9837	2.51643	5.67658	2.68637
TRITD2Av1G052460	Glycoside hydrolase family 17	TraesCS2D02G172300	AT3G57240, AT3G57260, AT4G16260, AT3G57270	TRITD2Av1G052460					1.82215e-06	6.08813e-05	-2.07979	0.435813	1.78491	0.722402	0.916674	0.152705	0.138639	0.0758596
TRITD5Bv1G125510	Transmembrane Fragile-X-F-associated protein	TraesCS5B02G205500, TraesCS5A02G207100, TraesCS5D02G213300	AT1G18470, AT1G68820, AT1G73950	TRITD5Bv1G125510					1.86488e-06	6.18606e-05	-0.975539	0.204621	2.68561	1.4107	2.00303	0.710472	0.768638	0.723067
TRITD6Av1G084670	Neprosin	TraesCS6A02G184200		TRITD6Av1G084670					1.94576e-06	6.40364e-05	-1.67959	0.352931	20.6012	15.4515	14.2885	2.22298	6.08502	2.17861
TRITD6Bv1G086030	Mitochondrial carrier protein	TraesCS6B02G210000, TraesCS6D02G168200, TraesCS6A02G175100	AT4G32400	TRITD6Bv1G086030					2.07247e-06	6.74087e-05	-1.40995	0.297068	119.775	78.1465	90.6099	13.8417	34.8457	25.9759
TRITD3Bv1G204670	Nucleotidyltransferase superfamily	TraesCS3B02G394800, TraesCS3A02G362300, TraesCS3D02G356000	AT2G39740	TRITD3Bv1G204670					2.09356e-06	6.78055e-05	-0.960052	0.202364	1.987	1.68014	1.54712	0.463345	0.902665	0.686363
TRITD2Bv1G041250	BIR repeat	TraesCS2B02G135400, TraesCS2D02G119400, TraesCS2A02G115600, TraesCSU02G217000		TRITD2Bv1G041250					2.13774e-06	6.9047e-05	-1.21477	0.256284	11.2012	11.9259	8.76212	2.21023	4.97404	2.80331
TRITD2Bv1G038670	Aspartic peptidase domain superfamily	TraesCS2B02G127400, TraesCS2D02G109600, TraesCSU02G217000		TRITD2Bv1G038670					2.33265e-06	7.43063e-05	-1.62761	0.344669	25.4059	20.7126	13.965	2.54402	6.85624	3.21898
TRITD4Bv1G002450	HPT domain superfamily	TraesCS4B02G011500, TraesCS4D02G009600, TraesCS4A02G302300		TRITD4Bv1G002450					2.37253e-06	7.54038e-05	-0.792822	0.168014	121.849	113.956	104.201	37.5574	57.6764	63.0088
TRITD7Bv1G140380	Ribonuclease III domain	TraesCS7B02G248100, TraesCS7D02G344100, TraesCS7A02G336500	AT4G15417	TRITD7Bv1G140380					2.42584e-06	7.68638e-05	-0.788863	0.167335	3.31269	2.60161	3.96523	1.34836	1.34417	1.76137
TRITD7Bv1G026740	F-box domain	TraesCS7B02G068500, TraesCS7A02G163000		TRITD7Bv1G026740					2.47347e-06	7.81355e-05	-0.627439	0.133206	11.838	8.61617	8.0882	4.43837	5.50261	5.2108
TRITD4Av1G247800	Acid phosphatase, class B-like	TraesCS4A02G431300	AT5G24780, AT5G24770	TRITD4Av1G247800					2.64674e-06	8.26075e-05	-0.988241	0.210421	43.8981	23.1556	43.8253	13.8112	13.0623	12.9138
TRITD7Av1G279880	K Homology domain	TraesCS1B02G431800, TraesCS2B02G550500	AT5G04430	TRITD7Av1G279880					2.69382e-06	8.36389e-05	-2.16861	0.462106	0.635531	0.750226	0.88544	0.118733	0.107917	0.0295248
TRITD0Uv1G139410	Transferase	TraesCSU02G266600, TraesCS1D02G009600, TraesCS1D02G009500, TraesCS1B02G014300, TraesCS1B02G016500	AT1G31490	TRITD0Uv1G139410					2.76383e-06	8.53675e-05	-3.17641	0.677615	0.50158	0.980989	1.05742	0	0	0
TRITD6Av1G008540	RNA polymerase subunit RPB4/RPC9	TraesCS6B02G062600, TraesCS6A02G046500, TraesCS6D02G053600	AT5G09920	TRITD6Av1G008540					3.02395e-06	9.2173e-05	-0.703503	0.150669	15.2619	18.8152	12.0083	6.57279	7.78168	8.24373
TRITD2Av1G077470	UbiB domain	TraesCS2A02G206600, TraesCS2B02G233800, TraesCS2D02G209300		TRITD2Av1G077470					3.0805e-06	9.36913e-05	-1.04947	0.224948	1.17479	1.22285	1.75189	0.541714	0.325483	0.599398
TRITD5Bv1G114230	Proton pump-interactor	TraesCS5B02G185200, TraesCS5A02G186800, TraesCS5D02G192100	AT4G27500, AT5G36780, AT5G36690, AT3G15340	TRITD5Bv1G114230					3.09422e-06	9.39713e-05	-0.714688	0.15322	48.5243	31.0737	39.3744	16.3989	22.2691	19.3422
TRITD4Av1G186220	Cysteine peptidase, cysteine active site	TraesCS4A02G252900, TraesCS4B02G062400	AT1G02305, AT1G02300, AT4G01610	TRITD4Av1G186220					3.17252e-06	9.60695e-05	-0.887708	0.190523	5.76552	5.81505	4.58518	2.94475	1.62148	2.24849
TRITD7Bv1G021580	NAC domain	TraesCS7B02G056300, TraesCS7D02G154200, TraesCS7A02G152500	AT3G04060, AT5G18270	TRITD7Bv1G021580	NAC	AT5G61430.1	1e-77	NAC domain containing protein 100	3.30851e-06	9.95371e-05	-3.76592	0.809758	4.20852	0.502271	3.68451	0.0557636	0	0.0527613
TRITD5Av1G200200	PLAT/LH2 domain	TraesCS5A02G378900, TraesCS5A02G379000, TraesCS5B02G382600, TraesCS5D02G388800	AT3G22400, AT1G55020	TRITD5Av1G200200					3.33063e-06	0.000100058	-1.90555	0.409858	45.0759	46.6995	29.0374	3.36133	4.98618	12.1468
TRITD4Av1G021180	Calcineurin-like phosphoesterase domain, ApaH type	TraesCS4A02G057700, TraesCS4D02G246600, TraesCS4B02G247300	AT1G13750	TRITD4Av1G021180					3.56585e-06	0.000106206	-0.729126	0.157302	11.7618	8.07972	11.4311	4.03735	5.70083	5.36656
TRITD6Av1G053800	Oxoglutarate/iron-dependent dioxygenase	TraesCS6A02G148800, TraesCS6D02G138200, TraesCS5B02G282100	AT1G49390, AT5G20400	TRITD6Av1G053800					3.5648e-06	0.000106206	-1.45593	0.314098	2.92601	3.14112	2.66819	0.638054	1.07392	0.41971
TRITD6Bv1G085940	Basic-leucine zipper domain	TraesCS6B02G209600, TraesCS6A02G175800, TraesCS6D02G167800	AT5G11260	TRITD6Bv1G085940	bZIP	AT5G11260.1	7e-53	bZIP family protein	3.57781e-06	0.000106411	-0.83227	0.179581	7.88624	7.29197	7.11547	4.60985	2.75245	2.63235
TRITD3Av1G161750	SANT/Myb domain	TraesCS3A02G240900, TraesCS3B02G269100, TraesCS3D02G241200		TRITD3Av1G161750	MYB_related	AT4G39250.1	4e-26	RAD-like 1	3.68636e-06	0.000109172	-1.39518	0.301444	23.242	14.7003	11.5438	2.45196	5.43202	4.19387
TRITD2Bv1G085450	Sugar/inositol transporter	TraesCS2B02G232900, TraesCS2A02G205500		TRITD2Bv1G085450					3.70789e-06	0.000109654	-0.921191	0.199085	5.52684	5.26076	5.13833	1.43686	2.82148	2.33979
TRITD3Bv1G221690	Oxoglutarate/iron-dependent dioxygenase	TraesCS3B02G432800, TraesCS3D02G393900, TraesCS3D02G394000, TraesCS3A02G399800		TRITD3Bv1G221690					3.8046e-06	0.000112037	-1.72147	0.372468	3.24757	1.11113	2.35919	0.259201	0.317578	0.529942
TRITD2Av1G029410	Aspartic peptidase A1 family			TRITD2Av1G029410					4.1658e-06	0.000121134	-1.70561	0.370548	3.38235	2.69769	2.38561	0.275295	0.992158	0.408349
TRITD7Av1G244860	Mediator complex, subunit Med17	TraesCS7A02G459200, TraesCS7B02G359400, TraesCS7D02G447100	AT5G20170	TRITD7Av1G244860					4.17143e-06	0.000121213	-0.673396	0.146306	3.47029	3.64669	3.29233	1.87457	1.87236	1.58783
TRITD1Bv1G006440	Pumilio RNA-binding repeat	TraesCS1B02G036400, TraesCS1D02G029400, TraesCS1A02G029200	AT2G29140, AT2G29200, AT2G29190	TRITD1Bv1G006440					4.41168e-06	0.000127043	-0.620493	0.135155	6.37609	4.93545	6.40474	2.57257	3.32712	3.7015
TRITD2Bv1G217940	Protein of unknown function DUF597	TraesCS2B02G469000, TraesCS2A02G448300, TraesCS2D02G447400	AT5G46710, AT1G32700, AT4G17900	TRITD2Bv1G217940					4.43511e-06	0.000127542	-1.09396	0.238342	6.89194	6.84244	7.27619	1.784	1.90778	3.76555
TRITD5Av1G114330	SANT/Myb domain	TraesCS5A02G153000, TraesCS5D02G158300, TraesCS5B02G151800	AT2G42660	TRITD5Av1G114330	G2-like	AT2G38300.1	6e-37	G2-like family protein	4.4431e-06	0.000127683	-1.31863	0.287315	1.83113	1.16219	1.55754	0.227981	0.562463	0.451204
TRITD0Uv1G023160	Oxoglutarate/iron-dependent dioxygenase	TraesCSU02G175100, TraesCS1D02G334100, TraesCS1A02G331600, TraesCS5A02G457300, TraesCS5B02G466400, TraesCS5D02G468100		TRITD0Uv1G023160					4.59834e-06	0.00013124	-0.897346	0.195828	3.77918	3.49445	3.28991	1.01182	1.83902	1.54683
TRITD5Bv1G157910	Oxoglutarate/iron-dependent dioxygenase	TraesCS5A02G282700, TraesCS5D02G290400	AT1G49390, AT5G20400	TRITD5Bv1G157910					4.738e-06	0.000135041	-0.98097	0.21437	28.4375	20.7113	17.2166	5.98289	9.03601	10.0142
TRITD0Uv1G061120	Bifunctional inhibitor/plant lipid transfer protein/seed storage helical domain	TraesCS7A02G460100, TraesCS7D02G448100, TraesCS7B02G360900		TRITD0Uv1G061120					5.02844e-06	0.000142057	-2.0408	0.447191	27.9524	21.2978	18.3702	1.83064	6.78009	1.73622
TRITD7Bv1G202750	ArgE/DapE/ACY1/CPG2/YscS, conserved site	TraesCS7B02G383900, TraesCS7A02G481500, TraesCS7D02G468600	AT4G20070	TRITD7Bv1G202750					5.13536e-06	0.000144587	-0.69719	0.15292	6.9852	6.18843	7.75205	2.62413	4.17802	3.79541
TRITD5Av1G166380	Oxoglutarate/iron-dependent dioxygenase	TraesCS5A02G282700, TraesCS5D02G290400	AT1G49390, AT5G20400	TRITD5Av1G166380					5.36025e-06	0.000150008	-1.12622	0.247511	2.1911	2.11244	1.50223	0.390345	0.759741	0.767065
TRITD7Av1G018760	Phosphotransferase KptA/Tpt1		AT2G45330, AT5G23600	TRITD7Av1G018760					5.45456e-06	0.000152442	-3.12809	0.688023	0.877511	0.763359	0.717929	0	0	0
TRITD6Bv1G038630	Glycoside hydrolase family 9	TraesCS6A02G093200, TraesCS6D02G089200	AT1G71380, AT1G22880	TRITD6Bv1G038630					5.52201e-06	0.000153812	-4.19345	0.922873	3.94208	0.284625	2.89026	0.0403836	0	0
TRITD7Av1G114110	ER lumen protein retaining receptor	TraesCS7A02G271400, TraesCS7D02G271700, TraesCS7B02G170600	AT2G21190, AT1G19970, AT4G38790, AT1G75760	TRITD7Av1G114110					5.70154e-06	0.00015839	-0.603915	0.133104	5.31465	5.59325	6.398	2.64418	3.39585	3.48435
TRITD4Bv1G204780	Homeobox domain	TraesCS4B02G385200, TraesCS5A02G549700, TraesCS4D02G359600	AT5G60690	TRITD4Bv1G204780	HD-ZIP	AT5G60690.1	0	HD-ZIP family protein	5.81728e-06	0.000161068	-0.625895	0.138077	3.90988	4.00119	4.48812	1.92244	2.6896	2.0992
TRITD4Av1G075040	Homeobox-like domain superfamily	TraesCS4A02G139000, TraesCS4B02G155200, TraesCS4D02G167100		TRITD4Av1G075040					5.88566e-06	0.000162638	-1.11847	0.246878	3.75104	1.93333	3.08421	0.701654	1.20652	0.923022
TRITD4Av1G261880	XS domain	TraesCS4A02G495800	AT5G23570	TRITD4Av1G261880					5.97472e-06	0.000164465	-0.723277	0.15976	8.6216	6.89353	6.53126	2.94041	4.65043	3.28089
TRITD5Bv1G080760	Glutathione S-transferase, C-terminal domain superfamily			TRITD5Bv1G080760					6.02306e-06	0.000165339	-2.89697	0.640132	0.653152	0.834122	0.399978	0.0438667	0	0
TRITD2Bv1G162500	Amino acid transporter, transmembrane domain	TraesCS2B02G343200, TraesCS2A02G338800, TraesCS2D02G324300		TRITD2Bv1G162500					6.05611e-06	0.000166027	-0.927749	0.205054	1.33646	1.41892	2.00227	0.59732	0.545768	0.705853
TRITD7Av1G061680	SANT/Myb domain	TraesCS7A02G188800, TraesCS7D02G189800, TraesCS1B02G283000, TraesCS7B02G093600	AT5G61620	TRITD7Av1G061680					6.0529e-06	0.000166027	-1.17485	0.259663	19.7595	14.226	16.4644	3.1664	6.75614	6.42318
TRITD2Av1G280380	Glycosyltransferase 2-like	TraesCS2A02G530900, TraesCS2B02G560100, TraesCS2D02G532800		TRITD2Av1G280380					6.29593e-06	0.000171924	-0.984546	0.218003	8.70004	7.17121	6.57926	1.89569	3.81263	2.98616
TRITD5Bv1G022090		TraesCS5B02G054200, TraesCS5D02G059700, TraesCS5A02G049100	AT1G56010, AT3G12977	TRITD5Bv1G022090	NAC	AT1G56010.2	3e-92	NAC domain containing protein 1	6.43079e-06	0.000175148	-0.740179	0.164057	8.12819	6.4706	8.03375	3.44712	3.6216	3.67322
TRITD2Av1G189770	Glycoside hydrolase, family 13, N-terminal	TraesCS2A02G310300, TraesCS2B02G327300, TraesCS2D02G308600	AT2G36390, AT5G03650	TRITD2Av1G189770					6.74659e-06	0.000182202	-1.44561	0.321136	32.1749	13.8802	25.8523	3.75963	7.65071	5.31605
TRITD5Av1G204680	Transcription factor, MADS-box	TraesCS5A02G391700, TraesCS5B02G396600, TraesCS5D02G401500		TRITD5Av1G204680	MIKC_MADS	AT1G69120.1	6e-90	MIKC_MADS family protein	6.76588e-06	0.000182486	-0.644086	0.143101	29.9403	30.7793	41.4386	21.3114	15.0968	17.4481
TRITD4Bv1G004960	Zf-FLZ domain	TraesCS4B02G018400, TraesCS4D02G016600, TraesCS4A02G295300		TRITD4Bv1G004960					7.03684e-06	0.00018785	-0.591315	0.131621	5.26187	7.91443	7.57202	3.91106	3.74899	3.68573
TRITD6Bv1G223090	NB-ARC	TraesCS6B02G448400, TraesCS6A02G403900		TRITD6Bv1G223090					7.02908e-06	0.00018785	-2.8695	0.638687	0.146312	0.173958	0.231066	0.0151927	0	0
TRITD1Av1G132960	Glycoside hydrolase, family 19, catalytic	TraesCS1A02G203600, TraesCS1D02G207000, TraesCS5B02G403700	AT3G12500	TRITD1Av1G132960					7.07166e-06	0.000188659	-1.61723	0.360064	2.57821	1.27603	1.34715	0.379401	0.190983	0.401481
TRITD0Uv1G057760	ATPase family AAA domain-containing protein 3, domain of unknown function DUF3523	TraesCS6B02G300900, TraesCS6D02G253600, TraesCS6A02G273800	AT4G36580, AT2G18330	TRITD0Uv1G057760					7.15575e-06	0.000190294	-0.583875	0.130068	9.37635	9.743	11.5089	6.80967	4.62249	5.87078
TRITD1Av1G044620	Pyrophosphate-energised proton pump	TraesCS1A02G107200, TraesCS1D02G107600, TraesCS1B02G124600		TRITD1Av1G044620					7.2077e-06	0.000191431	-1.34892	0.300597	70.0409	42.64	55.7453	8.89222	22.4653	14.7811
TRITD6Bv1G169540	Histone-fold	TraesCS6B02G316800, TraesCS6A02G287500, TraesCS6D02G268200		TRITD6Bv1G169540	NF-YB	AT1G09030.1	4e-09	nuclear factor Y, subunit B4	7.25152e-06	0.00019235	-1.38436	0.308583	20.5015	14.8145	10.882	2.23286	5.03415	4.48079
TRITD5Av1G002610	Leucine-rich repeat	TraesCS5A02G005300, TraesCS5D02G007200, TraesCS5B02G004300	AT5G62710	TRITD5Av1G002610					7.79555e-06	0.000205603	-0.676405	0.151297	2.43632	3.08028	3.37921	1.50373	1.67903	1.32195
TRITD4Av1G198930	EamA domain	TraesCS4A02G284700, TraesCS4B02G028400		TRITD4Av1G198930					7.94993e-06	0.000208751	-2.0266	0.453729	0.923701	0.630338	1.0159	0.138961	0.0631091	0.103595
TRITD3Bv1G272830	UDP-glucuronosyl/UDP-glucosyltransferase	TraesCS3B02G575100, TraesCS3A02G507200, TraesCS3D02G514700	AT3G46690, AT3G46680, AT5G59590, AT3G46650, AT5G05890, AT3G55710, AT3G46670, AT5G38040, AT3G46720, AT5G59580, AT5G37950, AT3G46660, AT5G05870, AT3G11340, AT5G05900, AT2G26480, AT5G05880, AT5G38010, AT3G55700, AT5G05860, AT3G46700	TRITD3Bv1G272830					8.22152e-06	0.000214666	-0.700838	0.157162	2.4619	1.6693	2.03109	0.874133	1.23678	0.942595
TRITD4Av1G178640	AMP-dependent synthetase/ligase	TraesCS4A02G239000, TraesCS4D02G074600, TraesCS4B02G076000	AT5G63380	TRITD4Av1G178640					8.27741e-06	0.000215855	-0.849194	0.190493	4.67895	5.31515	6.0124	2.14261	1.73472	3.16398
TRITD4Bv1G133190	Ternary complex factor MIP1, leucine-zipper	TraesCS4B02G219700, TraesCS4D02G220100, TraesCS4A02G084500	AT4G24580	TRITD4Bv1G133190					8.29452e-06	0.00021603	-1.30759	0.293349	1.62102	1.14045	2.55659	0.545098	0.489159	0.327862
TRITD5Bv1G250310	Glycoside hydrolase, family 32	TraesCS5B02G556700, TraesCS5D02G553000		TRITD5Bv1G250310					8.35896e-06	0.000217573	-2.06507	0.46346	15.0723	3.82936	13.7196	1.14295	1.54367	0.911338
TRITD2Av1G049810	SAP domain	TraesCS2A02G160300, TraesCS2B02G186600, TraesCS2D02G167700	AT4G39680	TRITD2Av1G049810					8.72771e-06	0.000225902	-0.586207	0.131835	2.06016	1.89175	2.57294	1.28279	0.997298	1.36204
TRITD2Av1G003340	Cytochrome P450	TraesCS2A02G013500, TraesCS2D02G014700	AT5G38970, AT3G30180	TRITD2Av1G003340					8.95651e-06	0.000230964	-1.7335	0.390345	1.00563	1.48927	1.05178	0.142709	0.390491	0.122737
TRITD3Bv1G077710				TRITD3Bv1G077710					9.83244e-06	0.000250301	-1.40085	0.316874	3.9461	1.92455	2.50549	0.397371	0.751237	0.904328
TRITD5Av1G224460	Glyoxalase/fosfomycin resistance/dioxygenase domain	TraesCS5A02G454700, TraesCS5B02G464300, TraesCS5D02G465200	AT1G67280	TRITD5Av1G224460					9.9732e-06	0.000253112	-1.52883	0.346065	1.07358	1.1021	0.98598	0.241765	0.137193	0.300272
TRITD6Av1G025160	Glycoside hydrolase family 9	TraesCS6A02G093200, TraesCS6D02G089200	AT1G71380, AT1G22880	TRITD6Av1G025160					1.00249e-05	0.000254114	-4.43244	1.00358	27.2422	1.2903	22.0414	0.0576282	0.131045	0.121421
TRITD3Av1G235830	Oxoglutarate/iron-dependent dioxygenase	TraesCS3A02G407800, TraesCS3D02G403000, TraesCS3B02G440500		TRITD3Av1G235830					1.00456e-05	0.00025433	-1.13372	0.25672	2.25401	1.46165	1.57714	0.52808	0.434563	0.713345
TRITD2Bv1G210930		TraesCS2B02G447800, TraesCS2D02G425400, TraesCS2A02G427300		TRITD2Bv1G210930					1.03952e-05	0.000261096	-2.18995	0.496724	0.943232	0.467929	1.11086	0.0633185	0.14368	0.0393114
TRITD6Bv1G027980	F-box domain	TraesCS6B02G102500		TRITD6Bv1G027980					1.05373e-05	0.000263579	-0.740262	0.168018	2.40002	1.75364	1.85447	0.935084	1.04602	0.860486
TRITD2Bv1G023810	Peptidase M20	TraesCS2B02G091000, TraesCS2D02G074800, TraesCS2D02G074700		TRITD2Bv1G023810					1.05739e-05	0.000264096	-0.7851	0.178226	2.72463	2.26722	2.37962	1.10579	0.882296	1.41547
TRITD4Bv1G008170	EamA domain	TraesCS4B02G028400, TraesCS4A02G284700		TRITD4Bv1G008170					1.059e-05	0.000264263	-2.16073	0.490545	1.13327	0.511286	0.914066	0.107707	0.0654114	0.0715828
TRITD1Bv1G220490	Zinc finger, BED-type			TRITD1Bv1G220490					1.09394e-05	0.000271681	-0.785402	0.178593	1.51989	1.35399	1.58699	0.900644	0.496617	0.68998
TRITD7Bv1G041740	NAC domain	TraesCS7B02G100300, TraesCS7A02G194700, TraesCS7D02G196300	AT3G04060, AT5G18270	TRITD7Bv1G041740	NAC	AT5G18270.2	1e-71	Arabidopsis NAC domain containing protein 87	1.10943e-05	0.00027471	-1.78391	0.405927	6.96747	2.28353	5.84722	0.520692	0.718943	1.12771
TRITD0Uv1G112470	Glycosyl hydrolase family 32, N-terminal	TraesCS2B02G594900, TraesCS2A02G588300, TraesCS2D02G564900		TRITD0Uv1G112470					1.13665e-05	0.000279129	-0.67501	0.153782	1.41454	1.8847	1.9499	1.08897	0.73452	0.856802
TRITD0Uv1G122230	Glycoside hydrolase, family 32	TraesCS2B02G594900, TraesCS2A02G588300, TraesCS2D02G564900		TRITD0Uv1G122230					1.13665e-05	0.000279129	-0.67501	0.153782	1.41454	1.8847	1.9499	1.08897	0.73452	0.856802
TRITD7Bv1G228880	Glycoside hydrolase, family 19, catalytic	TraesCS7B02G471500, TraesCS7A02G548000		TRITD7Bv1G228880					1.14337e-05	0.000280613	-2.04062	0.465033	0.732658	1.11603	1.19589	0.127571	0.144735	0.0791998
TRITD2Av1G164110	Rapid ALkalinization Factor	TraesCS2A02G277600, TraesCS2B02G295000, TraesCS2D02G276500		TRITD2Av1G164110					1.16783e-05	0.000285607	-2.14977	0.490423	4.58621	3.42794	4.39334	0.599306	0.319815	0.366622
TRITD6Bv1G138860	Remorin, C-terminal	TraesCS6B02G265700, TraesCS6A02G237200, TraesCS6D02G219800	AT1G63295, AT3G61260, AT4G00670, AT5G23750, AT3G48940, AT2G45820	TRITD6Bv1G138860					1.17683e-05	0.000286812	-1.5488	0.353459	2.81647	2.86193	1.90499	0.312625	0.40932	0.983037
TRITD2Av1G239640	Sucrose synthase	TraesCS2A02G406700, TraesCS2D02G403600, TraesCS2B02G424300	AT5G37180, AT1G73370	TRITD2Av1G239640					1.20262e-05	0.000292571	-1.04225	0.238113	0.733652	0.562955	0.763091	0.245454	0.293085	0.185477
TRITD5Bv1G171730		TraesCS5B02G320400, TraesCS5A02G320200, TraesCS5D02G326100	AT4G01410	TRITD5Bv1G171730					1.31745e-05	0.000315719	-1.93083	0.443137	23.6266	8.05699	19.2111	1.79622	4.06448	1.50269
TRITD3Av1G055290	GDSL lipase/esterase	TraesCS3A02G140800, TraesCS3D02G146300, TraesCS3B02G163800		TRITD3Av1G055290					1.33179e-05	0.000318422	-1.99618	0.458385	1.52165	1.85038	1.98105	0.0812862	0.492272	0.235689
TRITD4Bv1G118860	Gamma interferon inducible lysosomal thiol reductase GILT	TraesCS4B02G191500, TraesCS4D02G192700, TraesCS4A02G112600	AT1G07080	TRITD4Bv1G118860					1.36541e-05	0.000325342	-2.43634	0.560161	66.6709	13.7098	54.1509	1.91407	4.80096	3.58051
TRITD7Bv1G012480	Multi antimicrobial extrusion protein	TraesCS7B02G032100, TraesCS7D02G130700, TraesCS7A02G131500	AT4G00350, AT4G25640	TRITD7Bv1G012480					1.41955e-05	0.000336321	-0.619304	0.14267	4.09483	4.35013	4.69414	2.61283	2.70618	1.85859
TRITD2Bv1G006600	Terpene synthase, N-terminal domain	TraesCS2B02G031100		TRITD2Bv1G006600					1.52236e-05	0.000358033	-0.899711	0.208005	1.52648	1.72857	1.4574	0.812301	0.516038	0.605099
TRITD7Av1G195770	Protein of unknown function DUF761, plant	TraesCS7A02G361100, TraesCS7D02G362000		TRITD7Av1G195770					1.60912e-05	0.000376105	-1.42988	0.331512	69.1926	47.109	50.7762	7.66756	22.6456	13.2312
TRITD5Bv1G162020	Protein kinase domain	TraesCS5B02G292000, TraesCS5A02G292500	AT5G08660, AT1G34320	TRITD5Bv1G162020					1.67341e-05	0.000387225	-3.09004	0.717857	0.665651	0.71505	0.602643	0.0485464	0	0.0617116
TRITD6Av1G226570	Homeobox domain	TraesCS6A02G420800, TraesCS6B02G467500		TRITD6Av1G226570	HB-other	AT3G18380.1	6e-79	sequence-specific DNA binding transcription factors;sequence-specific DNA binding	1.75415e-05	0.000402779	-0.633517	0.147532	4.71247	4.52351	4.08979	1.79021	2.54062	2.88459
TRITD2Av1G183880	Cellulose synthase	TraesCS2A02G302300, TraesCS2B02G318100, TraesCS2D02G301000	AT2G32620, AT4G15320, AT2G32610, AT4G15290, AT2G32530, AT2G32540	TRITD2Av1G183880					1.79698e-05	0.000411029	-1.07123	0.249778	4.25803	2.82123	2.37044	1.05125	0.766903	1.42326
TRITD5Av1G200800	Uncharacterised protein family UPF0114	TraesCS5A02G379800, TraesCS5D02G389300, TraesCS5B02G383400		TRITD5Av1G200800					1.83097e-05	0.000417658	-0.643699	0.150237	3.28519	4.82998	3.9365	1.85201	2.02255	2.4262
TRITD6Av1G080890	Cytochrome P450	TraesCS6A02G179900, TraesCS6B02G205400		TRITD6Av1G080890					1.83218e-05	0.000417705	-1.28508	0.299943	1.40573	0.732523	1.07984	0.171154	0.39446	0.318949
TRITD3Bv1G215710	Glycosyl transferase, family 14	TraesCS3B02G418600, TraesCS3D02G379500, TraesCS3A02G386500	AT1G10280	TRITD3Bv1G215710					1.93048e-05	0.000436535	-2.64587	0.619238	0.492134	0.302743	0.26716	0	0	0.0635714
TRITD7Av1G006070	Pectinesterase inhibitor domain	TraesCS7A02G028600, TraesCS7D02G025600		TRITD7Av1G006070					1.93401e-05	0.00043686	-1.39784	0.327181	86.8403	79.2242	58.806	11.1653	32.0784	17.276
TRITD7Av1G088440	AAA+ ATPase domain	TraesCS7A02G240600, TraesCS7D02G239600, TraesCS7B02G136200		TRITD7Av1G088440					1.94831e-05	0.000439138	-0.846067	0.198108	1.67337	2.24144	2.48355	0.943497	0.6745	1.16189
TRITD2Bv1G214250	WRC domain	TraesCS2B02G458400, TraesCS2D02G435200, TraesCS2A02G435100		TRITD2Bv1G214250	GRF	AT3G13960.1	2e-49	growth-regulating factor 5	1.97677e-05	0.000444462	-1.15895	0.271577	2.23104	2.24413	2.25545	0.720816	0.420747	1.09823
TRITD4Av1G163940	Heavy metal-associated domain, HMA	TraesCS4A02G219400, TraesCS4D02G094100, TraesCS4B02G097900	AT3G02960, AT5G50740, AT5G63530	TRITD4Av1G163940					2.02548e-05	0.000453103	-1.77255	0.41589	5.7935	4.00016	4.84834	0.502803	1.83748	0.577618
TRITD1Bv1G115950	Protein of unknown function DUF1677, Oryza sativa			TRITD1Bv1G115950					2.06194e-05	0.00045978	-0.587552	0.137985	4.97297	5.20925	5.0859	2.7254	2.67567	3.12944
TRITD4Av1G188680		TraesCS4A02G258600, TraesCS4B02G055900, TraesCS4D02G056100		TRITD4Av1G188680					2.0679e-05	0.000460862	-0.785345	0.184465	23.719	36.1069	32.8607	11.8228	12.8092	17.833
TRITD2Av1G067240	GNAT domain		AT2G22905	TRITD2Av1G067240					2.09894e-05	0.000466782	-0.594408	0.139726	5.47338	4.13892	4.66595	3.10828	2.59955	2.22162
TRITD5Bv1G250990	Short-chain dehydrogenase/reductase SDR	TraesCS5B02G559400, TraesCS5D02G565600, TraesCS4A02G319700		TRITD5Bv1G250990					2.13311e-05	0.000472115	-3.03607	0.714288	2.36195	1.10827	1.85212	0.220143	0.075992	0
TRITD2Av1G244930	Peptidase S1, PA clan	TraesCS2A02G417000		TRITD2Av1G244930					2.1916e-05	0.000482498	-1.05067	0.247542	0.689843	0.688596	0.952357	0.284986	0.252148	0.25624
TRITD7Bv1G233820	NAC domain	TraesCS7B02G489500, TraesCS7D02G543500, TraesCS7A02G569100	AT3G04060, AT5G18270	TRITD7Bv1G233820	NAC	AT3G18400.1	8e-79	NAC domain containing protein 58	2.2161e-05	0.000486866	-2.37748	0.560472	4.72019	1.22906	4.60665	0.136331	0.495363	0.27105
TRITD2Av1G245160	Oleosin	TraesCS2A02G417500, TraesCS2D02G414800, TraesCS2B02G436400		TRITD2Av1G245160					2.22467e-05	0.00048849	-2.72646	0.642872	11.9328	6.24083	10.9518	0.20144	1.91939	0.45043
TRITD2Bv1G140740		TraesCS2B02G300300, TraesCS2D02G281700, TraesCS2A02G283000		TRITD2Bv1G140740					2.23713e-05	0.000490709	-2.82268	0.665757	0.866471	0.367236	0.773767	0	0.112122	0
TRITD4Bv1G164310		TraesCS4B02G276100, TraesCS4A02G030000, TraesCS4D02G274600		TRITD4Bv1G164310					2.25647e-05	0.000494171	-1.30222	0.307281	19.566	9.4665	15.8671	2.70275	3.70192	5.85757
TRITD3Av1G286810	Pectinesterase inhibitor domain	TraesCS3A02G536500, TraesCS3B02G607300, TraesCS3D02G542000		TRITD3Av1G286810					2.36899e-05	0.000514758	-1.69016	0.399855	7.53118	10.7301	16.2884	2.12508	1.08237	3.4689
TRITD5Bv1G116980	Heavy metal-associated domain, HMA	TraesCS5B02G191700, TraesCS5A02G191400, TraesCS5D02G199500	AT4G39700	TRITD5Bv1G116980					2.68901e-05	0.00057383	-0.68878	0.164061	6.82113	7.64046	6.9793	4.72617	2.73089	3.56851
TRITD5Bv1G241630		TraesCS5D02G086300		TRITD5Bv1G241630					2.75203e-05	0.000585181	-0.806456	0.192331	6.11908	5.29799	3.82732	1.91942	2.31936	2.45361
TRITD3Bv1G140240	SANT/Myb domain	TraesCS3B02G269100, TraesCS3D02G241200, TraesCS3A02G240900		TRITD3Bv1G140240	MYB_related	AT4G39250.1	3e-23	RAD-like 1	2.83231e-05	0.000599197	-1.30825	0.312488	17.3328	15.7634	9.6584	2.18835	4.42546	5.09643
TRITD0Uv1G112420	Glycoside hydrolase, family 32	TraesCS2B02G594900, TraesCS2A02G588300, TraesCS2D02G564900		TRITD0Uv1G112420					2.8979e-05	0.000609978	-0.776853	0.18579	2.69555	3.32832	3.44346	1.68412	1.0328	1.73436
TRITD0Uv1G113340	Glycosyl hydrolase family 32, N-terminal	TraesCS2B02G594900, TraesCS2A02G588300, TraesCS2D02G564900		TRITD0Uv1G113340					2.8979e-05	0.000609978	-0.776853	0.18579	2.69555	3.32832	3.44346	1.68412	1.0328	1.73436
TRITD7Bv1G041610	Amino acid transporter, transmembrane domain	TraesCS7B02G100100, TraesCS7A02G194500, TraesCS7D02G196100		TRITD7Bv1G041610					2.90193e-05	0.000610517	-1.03796	0.248255	3.0129	3.01754	2.73106	0.662013	1.59161	1.01063
TRITD5Av1G025490	Cytochrome P450	TraesCS5A02G056600, TraesCS5B02G060200, TraesCS5D02G067800		TRITD5Av1G025490					3.1042e-05	0.000645903	-0.874188	0.209854	1.25512	1.61515	0.918661	0.552844	0.511713	0.468766
TRITD6Av1G105940	WW domain superfamily	TraesCSU02G080500, TraesCS6D02G181600		TRITD6Av1G105940					3.13686e-05	0.000652048	-1.69434	0.406972	1.78906	2.56206	2.0493	0.389304	0.207395	0.600752
TRITD3Av1G236060	SWEET sugar transporter	TraesCS3A02G408200, TraesCS3B02G441800, TraesCS3D02G403300	AT1G21460	TRITD3Av1G236060					3.28529e-05	0.000679514	-0.599472	0.144356	5.3564	5.02402	7.64543	3.43142	2.84737	3.50968
TRITD3Bv1G234890	Zinc finger, RING-type	TraesCS3B02G462000, TraesCS3D02G420500, TraesCS3A02G425900, TraesCS3A02G425700		TRITD3Bv1G234890					3.30303e-05	0.000682845	-1.24709	0.300395	1.94869	1.44378	2.04106	0.313427	0.506906	0.776626
TRITD3Bv1G268120	Protein of unknown function DUF597	TraesCS3B02G560400, TraesCS3D02G505200, TraesCS3A02G497600	AT2G27930	TRITD3Bv1G268120					3.38556e-05	0.000697831	-0.96771	0.233417	18.251	11.7606	19.2837	4.58641	8.49068	5.86942
TRITD3Bv1G281180	Histone H2A	TraesCS3B02G611300, TraesCS3A02G534300, TraesCS3D02G539700		TRITD3Bv1G281180					3.42687e-05	0.000705216	-0.71607	0.172836	18.4903	17.1685	21.4579	10.2351	6.77731	11.5509
TRITD2Bv1G003650	CCR4-NOT transcription complex subunit 9	TraesCS2B02G005200, TraesCS2D02G013500, TraesCS2A02G012700	AT3G20800, AT2G32550, AT5G12980	TRITD2Bv1G003650					3.46186e-05	0.000710852	-0.812779	0.196288	31.1998	21.8952	25.4764	8.22049	13.7856	13.5946
TRITD1Bv1G053800	Pyrophosphate-energised proton pump	TraesCS1B02G124600, TraesCS1D02G107600, TraesCS1A02G107200		TRITD1Bv1G053800					3.46989e-05	0.000711694	-1.29279	0.312252	53.8576	35.2794	36.166	6.65307	17.5532	12.346
TRITD7Av1G082960	Phosphatidylethanolamine-binding, conserved site	TraesCS7A02G229400, TraesCS7B02G195200, TraesCS7D02G230000	AT1G18100	TRITD7Av1G082960					3.48414e-05	0.000713916	-0.770172	0.186065	27.5166	15.4151	22.9401	8.57187	10.005	11.3888
TRITD1Av1G032930	Helicase, C-terminal	TraesCS1A02G087300, TraesCS1B02G106200, TraesCS1B02G106700	AT2G47680	TRITD1Av1G032930					3.62705e-05	0.000739564	-0.732927	0.177463	1.11239	0.872874	1.02532	0.428997	0.509803	0.499789
TRITD2Bv1G170690	Uncharacterized membrane protein At3g27390-like	TraesCS2B02G360900, TraesCS2A02G321600, TraesCS2D02G341900	AT3G27390, AT5G40640	TRITD2Bv1G170690					3.77706e-05	0.000767897	-0.665221	0.161434	5.05902	4.35237	4.90455	2.884	1.80699	2.84452
TRITD5Bv1G128670	2Fe-2S ferredoxin-type iron-sulfur binding domain	TraesCS5B02G212200, TraesCS5A02G211700, TraesCS5D02G222200	AT4G05450, AT4G21090	TRITD5Bv1G128670					3.79687e-05	0.000770424	-0.736938	0.17889	7.77268	7.86917	7.01838	5.08611	3.30692	2.79797
TRITD2Av1G259500		TraesCS2A02G460800, TraesCS2B02G482600, TraesCS2D02G461100		TRITD2Av1G259500					3.84013e-05	0.00077623	-0.676306	0.164276	36.5711	46.1451	45.1925	27.8337	16.6903	21.5933
TRITD3Bv1G081070	Glycoside hydrolase family 1	TraesCS3B02G195600, TraesCS3D02G171000		TRITD3Bv1G081070					4.00355e-05	0.000802736	-0.845061	0.205747	1.35147	1.19848	1.11501	0.530787	0.431088	0.613289
TRITD2Bv1G092210	Ionotropic glutamate receptor	TraesCS2B02G246200, TraesCS2D02G226400, TraesCS2A02G220700	AT1G05200, AT2G32390	TRITD2Bv1G092210					4.01083e-05	0.000803669	-0.690797	0.168206	0.901349	0.748688	1.21477	0.497477	0.49351	0.418289
TRITD3Av1G223510	GDP-fucose protein O-fucosyltransferase	TraesCS3A02G365800, TraesCS3D02G358900, TraesCS3B02G397600	AT2G37980, AT3G54100, AT5G01100	TRITD3Av1G223510					4.04056e-05	0.000809237	-1.54639	0.376696	0.848272	0.636309	0.74155	0.0849168	0.255709	0.138172
TRITD3Bv1G009810	Proteinase inhibitor I12, Bowman-Birk	TraesCS3B02G038700, TraesCS3D02G025700		TRITD3Bv1G009810					4.04294e-05	0.000809327	-1.82234	0.443931	25.2083	27.3486	17.2072	2.42148	2.39765	8.52443
TRITD2Av1G273740	S1/P1 nuclease	TraesCS2A02G507800, TraesCS2D02G508400, TraesCS2B02G535800		TRITD2Av1G273740					4.1383e-05	0.000824456	-0.65441	0.159627	21.9815	12.833	15.2745	8.68778	7.99409	8.82832
TRITD5Bv1G024410		TraesCS5B02G059600, TraesCS6A02G397700		TRITD5Bv1G024410					4.22145e-05	0.000837422	-2.38165	0.581597	1.23702	0.784299	0.489187	0.0939285	0.106299	0
TRITD3Bv1G160250	Ubiquitin-conjugating enzyme E2	TraesCS3B02G303300, TraesCS3D02G269000, TraesCS3A02G269200	AT3G15355, AT1G53023, AT1G53025	TRITD3Bv1G160250					4.41541e-05	0.000863574	-0.658206	0.161144	3.36877	2.61825	2.6151	1.37597	1.73306	1.3458
TRITD6Bv1G047650		TraesCS6B02G140300, TraesCS6A02G144400, TraesCS2A02G522500, TraesCSU02G077700, TraesCS3D02G305700		TRITD6Bv1G047650					4.45536e-05	0.000869578	-2.65659	0.650727	0.987027	0.736336	0.494895	0.153054	0	0
TRITD2Bv1G197440	SPX domain	TraesCS2B02G417200, TraesCS2D02G396700, TraesCS2A02G399200	AT1G63010, AT4G22990, AT4G11810	TRITD2Bv1G197440					4.54291e-05	0.000883537	-0.786778	0.192933	3.48703	3.27429	5.03133	2.32663	1.4923	1.57396
TRITD3Av1G028060	Cereal seed allergen/trypsin and alpha-amylase inhibitor, conserved site	TraesCS3A02G095600, TraesCS3D02G096000, TraesCS3D02G095700, TraesCS3B02G111100, TraesCS3B02G111200, TraesCS3B02G111293		TRITD3Av1G028060					4.57159e-05	0.000888286	-3.61518	0.886831	32.2329	2.59908	22.5922	0.403515	0.545058	0.0994093
TRITD5Av1G150900	NAC domain	TraesCS5A02G245900, TraesCS5B02G243300	AT3G04060, AT5G18270	TRITD5Av1G150900	NAC	AT5G18270.1	1e-76	Arabidopsis NAC domain containing protein 87	4.57686e-05	0.000888895	-2.67288	0.655722	13.9357	2.40951	12.7035	0.290734	0.956978	0.460008
TRITD3Av1G209450	TRAM/LAG1/CLN8 homology domain	TraesCS3A02G340400, TraesCS3B02G372000, TraesCS3D02G333900	AT4G10360	TRITD3Av1G209450					4.61458e-05	0.000895083	-1.01384	0.248835	2.24942	1.92758	1.71888	0.639694	0.63464	0.83986
TRITD0Uv1G054630	S-phase kinase-associated protein 1-like			TRITD0Uv1G054630					4.68845e-05	0.000907775	-0.604211	0.148432	30.315	36.5022	34.7908	19.531	17.237	18.9532
TRITD3Av1G043210	Putative RNA methylase domain	TraesCS3A02G124500, TraesCS3B02G143600	AT3G26410	TRITD3Av1G043210					4.76547e-05	0.000919105	-0.653535	0.160698	2.25065	3.75937	2.90785	1.59491	1.44628	1.49461
TRITD5Bv1G228650		TraesCS5D02G481400, TraesCS5A02G468500		TRITD5Bv1G228650					4.77454e-05	0.000920004	-0.96752	0.23793	218.482	150.912	173.511	44.685	88.2773	80.9206
TRITD2Av1G029400	Aspartic peptidase A1 family	TraesCS2A02G109400, TraesCS2D02G109500, TraesCS2B02G127100, TraesCSU02G217000		TRITD2Av1G029400					4.78696e-05	0.000921545	-1.73855	0.427604	0.52122	0.576073	0.542766	0.156272	0.049121	0.0806332
TRITD0Uv1G076270	Peptidase S10, serine carboxypeptidase	TraesCS2A02G489700, TraesCS2B02G517600, TraesCS2D02G490000	AT3G10410, AT3G45010, AT5G22980, AT5G22960	TRITD0Uv1G076270					4.87241e-05	0.000935834	-0.624969	0.15387	4.73062	3.76104	4.71431	2.35079	2.46159	2.23038
TRITD7Av1G195860	Protein of unknown function DUF761, plant	TraesCS7A02G361200, TraesCS7D02G361900, TraesCS7B02G266700		TRITD7Av1G195860					4.89273e-05	0.000938873	-1.36486	0.336115	45.3957	30.2636	29.3515	4.83647	13.4782	10.4101
TRITD7Av1G278190	Piwi domain	TraesCS7A02G557400, TraesCS7B02G482100, TraesCS7D02G552900, TraesCS7D02G553200, TraesCS7D02G553000	AT1G48410	TRITD7Av1G278190					5.04362e-05	0.000963836	-1.53359	0.378329	1.84371	1.2635	1.19431	0.197085	0.309104	0.398336
TRITD2Bv1G078170	MFS transporter superfamily	TraesCS2B02G219700, TraesCS2D02G200300, TraesCS2A02G187600	AT2G44280, AT3G60070	TRITD2Bv1G078170					5.0476e-05	0.000964154	-0.592476	0.146167	3.38903	3.50673	3.16219	1.69891	2.00511	1.87549
TRITD0Uv1G025840	HAT, C-terminal dimerisation domain			TRITD0Uv1G025840					5.08559e-05	0.000969665	-2.94406	0.72663	2.68882	3.15835	1.48637	0	0	0
TRITD7Av1G179730	Transcription factor CBF/NF-Y/archaeal histone domain	TraesCS7A02G336700, TraesCS7B02G248300, TraesCS7D02G344400	AT5G50490, AT5G50470, AT5G27910, AT5G50480, AT5G38140	TRITD7Av1G179730	NF-YC	AT1G56170.1	8e-26	nuclear factor Y, subunit C2	5.10017e-05	0.000970639	-1.19322	0.29455	92.5921	51.7091	74.5331	13.5083	30.6864	24.3661
TRITD4Bv1G103860	Aminotransferase class-III	TraesCS4B02G167100, TraesCS4A02G137000, TraesCS4D02G170300	AT2G38400, AT3G08860	TRITD4Bv1G103860					5.10608e-05	0.00097132	-0.748884	0.184877	2.00115	1.85053	2.57297	1.34026	0.777115	0.957115
TRITD7Bv1G233800	Papain-like cysteine peptidase superfamily			TRITD7Bv1G233800					5.12603e-05	0.000974225	-1.5913	0.392933	1.60633	1.20043	1.76767	0.45244	0.307303	0.168148
TRITD0Uv1G078070	Syntaxin, N-terminal domain	TraesCS5B02G034800, TraesCS5B02G035600	AT3G03800, AT5G08080	TRITD0Uv1G078070					5.15222e-05	0.000976978	-1.59224	0.393281	5.03088	3.35519	2.0008	0.334196	0.84401	0.86996
TRITD4Av1G243640	Glycosyl transferase, family 1	TraesCS4A02G418200, TraesCS7D02G064300		TRITD4Av1G243640					5.17744e-05	0.00098108	-0.612775	0.151397	48.208	33.247	40.7806	17.6897	25.5822	23.3328
TRITD4Av1G065600	Late embryogenesis abundant protein, LEA_4 subgroup	TraesCS4A02G129100, TraesCS4D02G177500, TraesCS4B02G175600		TRITD4Av1G065600					5.29342e-05	0.000999661	-0.901202	0.222944	1.74325	1.45354	1.1636	0.405731	0.711192	0.658554
TRITD5Av1G124170	Neprosin	TraesCS5A02G166600, TraesCS5D02G171000, TraesCS5B02G163800		TRITD5Av1G124170					5.55916e-05	0.0010437	-0.99371	0.24653	27.5304	21.5397	15.069	5.91405	10.7366	7.22847
TRITD1Bv1G228570	CCT domain	TraesCS1B02G479000, TraesCS1A02G444400	AT5G53420, AT4G27900	TRITD1Bv1G228570					5.61271e-05	0.00105044	-0.720517	0.178854	3.60696	2.90671	2.96839	1.15893	1.59123	1.92864
TRITD1Bv1G041510	Galactose oxidase/kelch, beta-propeller	TraesCS1B02G104800, TraesCS5D02G524400		TRITD1Bv1G041510					5.88994e-05	0.00108961	-0.691808	0.172212	2.54944	1.74984	2.20314	0.85184	1.28781	1.11981
TRITD2Av1G170660	Short-chain dehydrogenase/reductase SDR	TraesCS2A02G285100, TraesCS2B02G302200, TraesCS2D02G284000	AT5G50700, AT5G50770, AT5G50600, AT5G50590, AT3G47360, AT5G50690, AT3G47350	TRITD2Av1G170660					5.98909e-05	0.00110501	-1.3502	0.336437	1.57116	0.836817	1.65392	0.199487	0.517861	0.332627
TRITD2Bv1G212290	Glycosyl transferase, family 14	TraesCS2B02G452200, TraesCS2A02G430900, TraesCS2D02G428700	AT4G25870, AT2G19160, AT5G57270, AT4G30060	TRITD2Bv1G212290					6.00615e-05	0.0011067	-0.701673	0.174869	2.69312	2.54976	3.86891	1.54013	1.43707	1.45489
TRITD2Bv1G163120	Amino acid transporter, transmembrane domain	TraesCS2B02G344500, TraesCS2A02G337400, TraesCS2D02G325500	AT1G25530	TRITD2Bv1G163120					6.1353e-05	0.0011275	-1.38502	0.345603	1.37343	0.895448	0.810911	0.191022	0.162767	0.445813
TRITD0Uv1G069680		TraesCS1B02G449900, TraesCS1A02G419700, TraesCS1D02G427700		TRITD0Uv1G069680					6.22116e-05	0.00114127	-0.634222	0.158387	36.8571	37.5214	24.8728	17.0597	20.1538	15.1475
TRITD1Av1G111900	Folylpolyglutamate synthetase	TraesCS1A02G173700, TraesCS1B02G190700, TraesCS1D02G165100	AT3G55630, AT5G05980	TRITD1Av1G111900					6.58647e-05	0.00119931	-0.678518	0.170023	1.40266	1.41509	1.60512	0.778098	0.8131	0.655032
TRITD7Av1G008200	Gliadin/LMW glutenin	TraesCS7A02G035500, TraesCS7D02G032000		TRITD7Av1G008200					6.6399e-05	0.00120655	-3.70704	0.929355	341.372	22.4776	383.49	4.45691	3.04474	3.16544
TRITD3Av1G161850	Aspartic peptidase A1 family	TraesCS3A02G241100, TraesCS3D02G241400, TraesCS3B02G269300	AT4G04460, AT1G62290, AT1G11910	TRITD3Av1G161850					6.91714e-05	0.00124916	-1.56403	0.393059	4.91064	1.8333	5.53271	0.832057	1.01366	0.530532
TRITD4Av1G142240	SANT/Myb domain	TraesCS4A02G180900, TraesCS4D02G131500	AT2G42660	TRITD4Av1G142240	G2-like	AT2G38300.1	1e-39	G2-like family protein	6.99327e-05	0.00126182	-0.931826	0.234332	2.11999	1.20363	1.25777	0.470378	0.658554	0.610795
TRITD3Av1G149740	AAA+ ATPase domain	TraesCS3A02G225200, TraesCS3B02G254800, TraesCS3D02G228100	AT5G52882, AT4G28000, AT1G64110	TRITD3Av1G149740					7.08169e-05	0.00127556	-0.586804	0.147678	15.9378	11.9071	11.3236	5.86034	8.17623	7.82517
TRITD6Av1G008380	Histone H2A	TraesCS6A02G042700, TraesCS6B02G058400		TRITD6Av1G008380					7.27767e-05	0.0013041	-2.08033	0.524407	4.27624	1.55421	1.64226	0.179513	0.592237	0.110615
TRITD6Av1G000370		TraesCS6A02G007900, TraesCS6B02G013800		TRITD6Av1G000370					7.35798e-05	0.00131311	-1.237	0.312026	478.259	436.65	301.636	81.493	200.787	95.7002
TRITD5Bv1G252440	Oxoglutarate/iron-dependent dioxygenase	TraesCS5B02G565900, TraesCS4A02G314000		TRITD5Bv1G252440					7.51305e-05	0.00133766	-0.905146	0.228605	2.80296	3.83684	2.97513	0.861557	1.76706	1.38127
TRITD1Av1G161100	Aspartic peptidase A1 family	TraesCS1A02G251900, TraesCS1D02G251700, TraesCS1B02G263100	AT5G19110, AT5G19100	TRITD1Av1G161100					7.64546e-05	0.00135803	-1.10175	0.278554	0.820598	1.33476	0.734125	0.25932	0.354439	0.300518
TRITD3Av1G069230	Casparian strip membrane protein	TraesCS3A02G160200, TraesCS3B02G190800, TraesCS3D02G167400	AT4G03540, AT1G03700	TRITD3Av1G069230					7.68626e-05	0.00136384	-0.742857	0.187876	6.7567	4.87236	4.99795	2.53517	3.21119	2.15772
TRITD7Av1G074480	Phosphatidylinositol 3-/4-kinase, catalytic domain	TraesCS7A02G213100, TraesCS7B02G119800, TraesCS7D02G215000	AT1G13640, AT1G26270, AT2G03890	TRITD7Av1G074480					7.69012e-05	0.00136394	-0.600685	0.151924	35.3269	21.6846	29.8174	14.1648	17.3885	15.5319
TRITD7Bv1G033640	Alpha crystallin/Hsp20 domain	TraesCS7B02G083100, TraesCS7D02G179100, TraesCS7D02G179000	AT5G51440, AT4G25200	TRITD7Bv1G033640					7.78104e-05	0.00137597	-1.50549	0.381035	2.00502	1.86362	1.29363	0.160286	0.51719	0.516894
TRITD5Bv1G091180	Glutathione S-transferase, N-terminal	TraesCS5B02G142500		TRITD5Bv1G091180					7.88005e-05	0.00138935	-0.875541	0.221767	6.53905	4.12347	5.05631	1.94631	1.66631	3.0343
TRITD3Bv1G205740	SOUL haem-binding protein	TraesCS3B02G397400, TraesCS3D02G358700, TraesCS3A02G365600	AT2G37970	TRITD3Bv1G205740					7.99551e-05	0.00140733	-0.763905	0.193662	5.22381	4.67027	5.07332	1.58035	2.68104	2.94411
TRITD3Bv1G025750	NAC domain	TraesCS3B02G092800, TraesCS3D02G078500, TraesCS3A02G077900	AT3G04060, AT5G18270	TRITD3Bv1G025750	NAC	AT5G61430.1	2e-81	NAC domain containing protein 100	8.03478e-05	0.00141305	-2.37809	0.603061	0.833881	0.858141	0.505556	0	0.109851	0.0601076
TRITD1Av1G002790	Gliadin/LMW glutenin			TRITD1Av1G002790					8.13497e-05	0.00142766	-4.11127	1.04337	230.513	10.5564	238.305	1.74313	1.46645	0.971331
TRITD5Av1G256330	PGG domain	TraesCS5A02G551600, TraesCS2D02G482300, TraesCS2B02G508600, TraesCSU02G125600		TRITD5Av1G256330					8.16354e-05	0.00143147	-1.14781	0.291356	0.242829	0.296895	0.381049	0.0987517	0.0817959	0.0989585
TRITD6Av1G005860	Plant peroxidase	TraesCS6B02G042500	AT5G67400, AT4G37520, AT4G37530, AT3G49960	TRITD6Av1G005860					8.37629e-05	0.00145957	-2.85959	0.727008	0.415786	0.357455	1.24799	0.0989638	0	0
TRITD1Av1G156270		TraesCS1A02G242400, TraesCS1B02G253800, TraesCS1D02G242300		TRITD1Av1G156270					8.61275e-05	0.00148895	-1.24611	0.317345	3.61699	2.73148	2.0739	0.499176	0.67544	1.31461
TRITD7Av1G027060				TRITD7Av1G027060					8.63829e-05	0.00149275	-0.998119	0.254235	522.335	452.565	383.68	105.652	189.43	231.299
TRITD4Bv1G002110	HPT domain superfamily	TraesCS4B02G006500, TraesCS4D02G008600, TraesCS4A02G304200		TRITD4Bv1G002110					8.76375e-05	0.00150817	-1.40001	0.356919	24.7357	14.2518	12.8425	2.56456	7.11522	3.68264
TRITD0Uv1G059370	Pectinesterase inhibitor domain	TraesCS7A02G038100, TraesCS7D02G034200		TRITD0Uv1G059370					8.83875e-05	0.00151733	-1.28389	0.327486	80.5305	51.2234	34.3596	10.5792	22.0335	13.0837
TRITD7Bv1G195170	P-loop containing nucleoside triphosphate hydrolase	TraesCS7B02G365200, TraesCS7D02G452400, TraesCS7A02G464700		TRITD7Bv1G195170					9.00057e-05	0.0015413	-2.51561	0.642383	0.214938	0.112573	0.253519	0	0.0393861	0
TRITD3Bv1G040910	Zinc finger, CCCH-type	TraesCS3B02G125600, TraesCS3A02G107200, TraesCS3D02G109300		TRITD3Bv1G040910	C3H	AT4G29190.1	4e-96	C3H family protein	9.47948e-05	0.0016042	-1.54968	0.396994	4.7823	5.66518	6.09249	0.813515	0.750756	2.54049
TRITD2Av1G033170		TraesCS2A02G118100, TraesCS2D02G116900, TraesCS2B02G138100	AT5G07500	TRITD2Av1G033170					9.78943e-05	0.00164464	-1.19021	0.305516	5.74418	2.50946	5.79678	1.07903	1.74373	1.21657
TRITD3Bv1G158410	Origin recognition complex subunit 4	TraesCS3B02G298900, TraesCS3A02G265500, TraesCS3D02G265800	AT2G01120	TRITD3Bv1G158410					9.9433e-05	0.00166646	-0.69639	0.17893	8.74557	9.39389	8.68309	6.34953	3.82613	3.67707
TRITD3Bv1G282680		TraesCS3B02G605300, TraesCS2D02G081700, TraesCS3A02G539500		TRITD3Bv1G282680					0.000101078	0.00168861	-0.998569	0.256834	991.1	922.914	605.845	208.685	420.519	319.741
TRITD7Av1G016820	Cysteine peptidase, cysteine active site	TraesCS7A02G065700, TraesCS7D02G060100		TRITD7Av1G016820					0.000102436	0.00170855	-1.34761	0.346896	9.906	6.69001	6.03724	1.08078	3.2504	1.9722
TRITD5Av1G163410	FAD dependent oxidoreductase	TraesCS5A02G276200, TraesCS5B02G275600, TraesCS5D02G283600	AT2G24580	TRITD5Av1G163410					0.000105457	0.00174497	-0.637694	0.164452	9.33796	7.46305	8.44017	3.65521	4.00867	5.99681
TRITD7Bv1G117050	Invertase/pectin methylesterase inhibitor domain superfamily	TraesCS7B02G206800, TraesCS7D02G303400, TraesCS7A02G306500		TRITD7Bv1G117050					0.000105771	0.00174809	-0.90801	0.234207	37.0304	38.851	26.3564	9.6986	19.3357	13.438
TRITD3Av1G248110	ERCC4 domain	TraesCS1B02G105000, TraesCS1B02G122400	AT4G30870, AT5G39770	TRITD3Av1G248110					0.000106405	0.00175462	-2.88358	0.744053	0.233992	0.243041	0.203519	0	0	0
TRITD7Bv1G070170	FAR1 DNA binding domain			TRITD7Bv1G070170	FAR1	AT3G22170.2	1e-14	far-red elongated hypocotyls 3	0.000107298	0.00176772	-0.924855	0.238767	2.0296	1.8715	1.96989	0.567815	1.24777	0.637484
TRITD5Bv1G243850	Aspartic peptidase A1 family	TraesCS5B02G529900, TraesCS5D02G529000, TraesCS5B02G530000, TraesCSU02G217000		TRITD5Bv1G243850					0.000107419	0.00176832	-0.895122	0.231107	1.68075	0.907404	0.800571	0.437669	0.397923	0.462683
TRITD3Av1G166950	B3 DNA binding domain			TRITD3Av1G166950	B3	AT3G26790.1	2e-43	B3 family protein	0.000107658	0.00177156	-0.748961	0.193398	2.5773	3.59045	3.24956	1.62823	1.35348	1.43096
TRITD4Av1G201430	Cupin 1	TraesCS4A02G296100, TraesCS4D02G016100, TraesCS4B02G017500, TraesCS4B02G017600	AT3G22640	TRITD4Av1G201430					0.000108063	0.00177612	-2.6948	0.696017	7.63752	1.68921	4.96031	0.122147	0.769233	0.187069
TRITD4Av1G201440	Cupin 1	TraesCS4A02G296000, TraesCS4D02G016100, TraesCS4B02G017500, TraesCS4B02G017600	AT3G22640	TRITD4Av1G201440					0.000108063	0.00177612	-2.6948	0.696017	7.63752	1.68921	4.96031	0.122147	0.769233	0.187069
TRITD2Bv1G152420	Domain of unknown function DUF4149	TraesCS2A02G305300		TRITD2Bv1G152420					0.00011346	0.00185677	-2.86431	0.742079	1.14629	0.390212	0.188745	0.0508497	0	0.0199661
TRITD7Bv1G000830	Bifunctional inhibitor/plant lipid transfer protein/seed storage helical domain superfamily	TraesCS7B02G003500, TraesCS1D02G362100		TRITD7Bv1G000830					0.000114065	0.00186229	-2.87763	0.745781	2.74327	0.529912	0.703942	0	0	0
TRITD7Bv1G193680		TraesCS7B02G361200, TraesCS7B02G361100, TraesCS7D02G448200		TRITD7Bv1G193680					0.000114647	0.00187033	-1.38796	0.359828	285.953	216.703	169.649	34.4625	103.298	46.6993
TRITD1Bv1G225340		TraesCS1B02G470700, TraesCS1D02G443800		TRITD1Bv1G225340					0.000114801	0.00187211	-1.18182	0.306412	79.1104	69.6686	46.1915	11.7974	28.0244	22.3229
TRITD1Av1G002360	Gliadin/LMW glutenin			TRITD1Av1G002360					0.000117473	0.00190451	-3.61028	0.937409	362.785	26.3396	390.739	5.8833	5.64749	2.22366
TRITD3Av1G166310	Porin, eukaryotic type	TraesCS3A02G247900, TraesCS3D02G247900, TraesCS3B02G276600	AT5G15090, AT5G37610, AT3G01280	TRITD3Av1G166310					0.000120131	0.00194231	-0.632518	0.164467	3.66992	4.36579	6.35258	2.60243	2.33756	2.51825
TRITD7Bv1G170420	Signal transduction response regulator, receiver domain	TraesCS7B02G310200, TraesCS7A02G411000, TraesCS7D02G404000		TRITD7Bv1G170420	G2-like	AT4G16110.1	5e-18	response regulator 2	0.000120209	0.00194282	-1.1149	0.289908	0.861201	0.589739	0.710287	0.232344	0.221056	0.230567
TRITD7Av1G081850	Zinc finger C2H2-type	TraesCS7A02G226800, TraesCS7D02G227600		TRITD7Av1G081850	C2H2	AT5G06650.1	6e-05	C2H2 family protein	0.000121632	0.00196126	-0.93324	0.242853	9.42318	7.68698	5.27228	2.02126	3.55667	3.24354
TRITD4Av1G202760	HPT domain superfamily	TraesCS4A02G302300, TraesCS4D02G009600, TraesCS1B02G061300, TraesCS4B02G011500		TRITD4Av1G202760					0.000123482	0.00198495	-1.05512	0.274835	24.4569	13.8351	21.2566	4.35974	8.84595	7.90286
TRITD0Uv1G062490	RNA-binding, CRM domain	TraesCS7A02G557100, TraesCS7D02G553500, TraesCS7B02G481800	AT5G16180	TRITD0Uv1G062490					0.000127952	0.00204185	-1.00469	0.262296	0.813599	0.435662	0.428516	0.222116	0.21289	0.148711
TRITD7Bv1G204880	Zinc finger, RING-type	TraesCS7B02G390000, TraesCS7A02G486700, TraesCS7D02G473200	AT3G09770, AT3G53410, AT5G03200	TRITD7Bv1G204880					0.000128444	0.00204813	-0.692259	0.180774	4.43763	4.41076	2.97341	1.70332	2.02257	2.11679
TRITD6Bv1G001960	Rhodanese-like domain	TraesCS6B02G011500, TraesCS6A02G005900, TraesCS6D02G008600		TRITD6Bv1G001960					0.000133309	0.00210717	-1.99345	0.52181	6.39325	6.38275	4.13346	0.747622	0.264141	1.72382
TRITD1Av1G171690	SANT/Myb domain	TraesCS1A02G275800, TraesCS1D02G275400, TraesCS1B02G285000	AT4G09450, AT3G10580, AT3G10590	TRITD1Av1G171690	MYB_related	AT2G38090.1	1e-49	MYB family protein	0.000134261	0.0021198	-1.29203	0.33836	29.0204	15.7468	23.6203	6.87513	3.47579	9.32137
TRITD6Bv1G069150	Knottin, scorpion toxin-like	TraesCS6B02G184900, TraesCS6A02G157100, TraesCS6D02G146400		TRITD6Bv1G069150					0.000135005	0.00212914	-1.14072	0.29884	302.284	264.43	194.794	47.813	116.34	92.706
TRITD6Av1G226590	Homeobox domain	TraesCS6A02G420600		TRITD6Av1G226590	HB-other	AT3G18380.1	2e-84	sequence-specific DNA binding transcription factors;sequence-specific DNA binding	0.000135789	0.00213827	-0.702177	0.184022	2.60075	2.29784	1.8256	1.11924	1.27007	0.926598
TRITD2Bv1G198010	F-box domain	TraesCS2B02G418200, TraesCS2D02G397700, TraesCS2A02G400100	AT3G61060, AT5G52120, AT1G12710, AT1G63090	TRITD2Bv1G198010					0.00013832	0.00216911	-0.707921	0.18575	2.97207	2.86074	2.47263	1.01185	1.42808	1.71711
TRITD5Av1G019880		TraesCS5A02G046300, TraesCS5B02G050800		TRITD5Av1G019880					0.000140392	0.00219417	-1.87807	0.493258	3.99269	3.53975	5.15469	0.916183	0.408024	0.447311
TRITD2Av1G036290	Neprosin	TraesCS2A02G128600, TraesCS2B02G150700		TRITD2Av1G036290					0.000141329	0.00220386	-0.995017	0.261445	52.8579	46.2812	34.4301	11.1881	24.7463	15.5982
TRITD1Av1G205650	Pectinesterase inhibitor domain	TraesCS1A02G365500, TraesCS1B02G383000		TRITD1Av1G205650					0.00014416	0.00223627	-2.65707	0.699059	0.991887	0.885892	1.20096	0	0	0.260238
TRITD6Bv1G028100	F-box-like domain superfamily	TraesCS6B02G102700, TraesCSU02G027200		TRITD6Bv1G028100					0.000149478	0.00230252	-1.04233	0.27488	4.95047	2.73661	2.74331	1.31514	1.53326	0.792354
TRITD5Bv1G117330		TraesCS5B02G190500, TraesCS5B02G192200, TraesCS5D02G198400, TraesCS5A02G195200		TRITD5Bv1G117330					0.000149885	0.00230794	-1.22385	0.322808	7.15286	4.10806	5.61834	0.918144	2.5575	1.63909
TRITD1Av1G197370	Pectinesterase inhibitor domain	TraesCS1A02G338800, TraesCS1B02G384400		TRITD1Av1G197370					0.00015426	0.00235616	-1.1657	0.308053	40.7907	32.2978	24.9608	5.96078	15.1656	11.1198
TRITD2Bv1G198520	Domain of unknown function DUF4005	TraesCS2B02G418900, TraesCS2D02G398300	AT5G62070, AT5G07240, AT4G23060	TRITD2Bv1G198520					0.000163584	0.00247232	-0.591702	0.156972	7.22891	7.95097	6.95711	3.57368	5.563	3.44736
TRITD7Av1G024910		TraesCS7A02G086400, TraesCS7D02G081100		TRITD7Av1G024910					0.000164969	0.00248694	-1.15967	0.307818	27.4567	20.9595	11.3999	4.80214	8.20472	5.10525
TRITD5Bv1G102480	Neprosin	TraesCS5B02G163800, TraesCS5D02G171000, TraesCS5A02G166600		TRITD5Bv1G102480					0.000166405	0.00250316	-1.13721	0.302031	7.50517	5.20021	4.31644	1.42037	2.96448	1.31369
TRITD0Uv1G085040		TraesCSU02G264800		TRITD0Uv1G085040					0.000167068	0.0025095	-0.850571	0.225962	11.7322	13.0899	7.86788	3.30338	5.64234	5.0834
TRITD1Av1G183460	LURP-one-related	TraesCS1A02G303600, TraesCS1B02G314000, TraesCS1D02G303100	AT2G38640	TRITD1Av1G183460					0.000168702	0.00252767	-0.827939	0.220092	2.77375	3.32817	2.37384	0.978549	1.10566	1.64578
TRITD1Bv1G022930		TraesCS1B02G081000		TRITD1Bv1G022930					0.000169069	0.00253045	-0.778251	0.206913	612.711	521.402	372.745	172.439	280.97	242.666
TRITD5Av1G017970		TraesCS5A02G041900, TraesCS5D02G049600, TraesCS5B02G044400		TRITD5Av1G017970					0.00017142	0.00255737	-1.00324	0.266977	20.6868	29.3777	32.1001	12.7966	6.26353	12.1265
TRITD1Av1G136190	Zinc finger C2H2-type	TraesCS1A02G211800, TraesCS1D02G214900, TraesCS1B02G225500		TRITD1Av1G136190					0.00017271	0.00257295	-0.855218	0.227699	1.27692	1.78972	1.33628	0.602308	0.437915	0.860291
TRITD3Av1G179100	Ubiquitin-conjugating enzyme E2	TraesCS3A02G269200, TraesCS3D02G269000, TraesCS3B02G303300	AT3G15355, AT1G53023, AT1G53025	TRITD3Av1G179100					0.000173044	0.002577	-0.614045	0.163509	2.14632	1.55413	2.21879	0.95067	1.07569	1.14885
TRITD6Av1G180690		TraesCS6A02G287500, TraesCS6D02G268200, TraesCS6B02G316800		TRITD6Av1G180690	NF-YB	AT1G09030.1	7e-07	nuclear factor Y, subunit B4	0.00017454	0.00259557	-1.39045	0.370464	15.7178	13.8269	17.7548	1.91388	6.71219	4.48079
TRITD1Av1G030230	SANT/Myb domain	TraesCS1A02G083100, TraesCS1D02G084400, TraesCS1B02G100600		TRITD1Av1G030230	MYB	AT1G09540.1	1e-89	myb domain protein 61	0.000183551	0.00269782	-0.642788	0.171839	1.6729	2.35285	2.98177	1.17558	1.12128	1.29637
TRITD1Bv1G022940	Bifunctional inhibitor/plant lipid transfer protein/seed storage helical domain superfamily	TraesCS1B02G081200		TRITD1Bv1G022940					0.000186536	0.00273356	-0.75669	0.202508	418.221	350.63	244.665	122.105	185.771	166.558
TRITD1Av1G205890	Invertase/pectin methylesterase inhibitor domain superfamily	TraesCS1A02G366600, TraesCS1B02G384400		TRITD1Av1G205890					0.000188666	0.00276034	-1.13228	0.303257	231	190.629	155.129	37.5054	99.2332	62.4921
TRITD3Av1G026730		TraesCS3A02G092600, TraesCS3D02G092700		TRITD3Av1G026730					0.0001933	0.00281432	-1.46421	0.392801	73.3201	68.1467	47.3049	11.4471	29.5941	8.69875
TRITD6Av1G092120	EF-G domain III/V-like	TraesCS6A02G189500	AT1G56070, AT3G12915	TRITD6Av1G092120					0.000200141	0.00288992	-3.43315	0.923178	4.91003	5.5564	3.83261	0	0	0.902184
TRITD1Av1G200970	Matrin/U1-C-like, C2H2-type zinc finger	TraesCS1A02G348200, TraesCS1D02G351200, TraesCS1B02G362800		TRITD1Av1G200970					0.000203388	0.00292545	-0.663919	0.178724	6.66097	5.31757	5.25665	2.12861	3.54896	3.40524
TRITD3Av1G220620	Basic-leucine zipper domain	TraesCS3A02G372100, TraesCS3D02G365500, TraesCS3D02G365000	AT2G36270	TRITD3Av1G220620	bZIP	AT2G36270.1	2e-49	bZIP family protein	0.000204628	0.00294117	-1.29766	0.34947	2.99814	1.06326	2.93442	0.466954	0.645731	0.609312
TRITD3Bv1G156040		TraesCS3B02G297200, TraesCS3D02G263800		TRITD3Bv1G156040					0.000208934	0.00299103	-0.690753	0.186289	1.88152	1.59844	1.62333	1.03431	1.00353	0.590063
TRITD2Bv1G206140	Oleosin	TraesCS2B02G436400, TraesCS2A02G417500, TraesCS2D02G414800		TRITD2Bv1G206140					0.000213378	0.00303563	-1.59687	0.43128	58.9626	48.6472	50.3059	5.91062	24.5781	8.30702
TRITD5Av1G038640	Neprosin	TraesCS5A02G074500, TraesCS2D02G138700, TraesCS5B02G201500	AT1G10750	TRITD5Av1G038640					0.000220969	0.00312444	-2.04448	0.553496	1.08215	1.07054	1.33425	0.0855628	0.431041	0.0530205
TRITD7Bv1G005940	AP2/ERF domain	TraesCS7B02G018700, TraesCS7A02G120600, TraesCS7D02G117600		TRITD7Bv1G005940					0.000221555	0.00313059	-2.4813	0.671879	2.17493	0.279823	2.10173	0.04748	0.107457	0.0587977
TRITD5Bv1G241760	Aspartic peptidase A1 family	TraesCS5B02G522600, TraesCS4A02G350400, TraesCSU02G217000		TRITD5Bv1G241760					0.000227866	0.00320349	-1.20648	0.327321	4.31969	4.14889	3.09974	0.748249	2.10991	0.930002
TRITD3Av1G011190	Proteinase inhibitor I12, Bowman-Birk	TraesCS3A02G046000, TraesCS3B02G037400		TRITD3Av1G011190					0.000231622	0.00324309	-1.60148	0.434976	65.8437	46.4973	31.8935	5.20221	8.11961	19.0639
TRITD3Bv1G006880	TRAF-like	TraesCS3B02G028900, TraesCS3D02G015600, TraesCS3A02G030100, TraesCSU02G045900		TRITD3Bv1G006880					0.000232834	0.00325249	-0.884538	0.240335	3.4948	4.7651	5.02224	2.48732	1.20825	1.9548
TRITD1Av1G205620	Glycoside hydrolase, family 28	TraesCS1A02G365300, TraesCS1B02G382800, TraesCS1D02G370800		TRITD1Av1G205620					0.000232803	0.00325249	-1.309	0.35566	3.78522	2.30564	2.15384	0.385847	0.842577	1.10823
TRITD5Av1G239070	Knottin, scorpion toxin-like	TraesCS5A02G496600, TraesCS4D02G321200, TraesCS4B02G324100		TRITD5Av1G239070					0.000238265	0.00331615	-0.863035	0.234868	32.4515	33.8266	23.9507	8.85529	18.1035	12.243
TRITD4Bv1G058360	GDP-fucose protein O-fucosyltransferase	TraesCS4B02G134300, TraesCS7D02G287100, TraesCS3A02G205400	AT1G35510	TRITD4Bv1G058360					0.000240405	0.00333887	-0.907778	0.247198	4.53096	4.79866	4.7468	2.0922	2.66545	1.18388
TRITD0Uv1G116690		TraesCS3A02G510800, TraesCS3B02G578900		TRITD0Uv1G116690					0.000240618	0.00333887	-1.85248	0.504483	7.81359	9.48321	5.68265	0.637499	3.00208	0.583877
TRITD0Uv1G116700		TraesCS3A02G510800, TraesCS3B02G578900		TRITD0Uv1G116700					0.000240618	0.00333887	-1.85248	0.504483	7.81359	9.48321	5.68265	0.637499	3.00208	0.583877
TRITD0Uv1G132140		TraesCS3A02G510800, TraesCS3B02G578900		TRITD0Uv1G132140					0.000240618	0.00333887	-1.85248	0.504483	7.81359	9.48321	5.68265	0.637499	3.00208	0.583877
TRITD7Av1G096020	Exostosin-like	TraesCS7A02G251600, TraesCS7B02G139500, TraesCS7D02G249700	AT1G80290	TRITD7Av1G096020					0.000246616	0.00339834	-1.40753	0.383968	0.727266	0.893591	1.06486	0.271986	0.274385	0.112602
TRITD7Av1G271980	Armadillo-type fold	TraesCS7A02G536400, TraesCS7B02G454600, TraesCS7D02G523000		TRITD7Av1G271980					0.00024868	0.00341888	-2.81819	0.769237	0.130663	0.0804524	0.255442	0	0	0
TRITD4Av1G202810	HPT domain superfamily	TraesCS6A02G364400, TraesCS4B02G010800, TraesCS4B02G011000, TraesCS4B02G011100, TraesCS4B02G010700, TraesCS4D02G009300		TRITD4Av1G202810					0.000251367	0.00344672	-1.10864	0.302837	65.5061	50.8179	41.8643	9.98508	23.883	21.2706
TRITD0Uv1G052160	Amino acid transporter, transmembrane domain	TraesCS6B02G007400, TraesCS6A02G002400, TraesCS6D02G003200	AT3G54830, AT2G39130	TRITD0Uv1G052160					0.0002563	0.00350055	-0.703199	0.192347	4.46617	4.19543	2.95391	1.41917	2.15267	2.21554
TRITD7Av1G060760	Zinc finger, CCHC-type			TRITD7Av1G060760					0.000260401	0.00354496	-2.43604	0.667077	0.230104	0.228899	0.100935	0.0463104	0	0
TRITD1Bv1G147950	Pyruvate phosphate dikinase, AMP/ATP-binding	TraesCS1B02G264900, TraesCS1D02G252900, TraesCS1A02G253400, TraesCS1A02G253200	AT4G15530	TRITD1Bv1G147950					0.000261989	0.00356424	-0.702908	0.192565	58.473	36.861	47.652	17.8082	29.0114	24.5053
TRITD2Av1G247080	Transcription factor, MADS-box	TraesCS2A02G422400, TraesCS2B02G440900, TraesCS2D02G418800	AT1G31140	TRITD2Av1G247080	MIKC_MADS	AT5G23260.2	5e-48	MIKC_MADS family protein	0.000263274	0.00357357	-0.856905	0.234834	2.07615	2.68325	2.20392	1.2701	1.16464	0.615103
TRITD2Bv1G155490	Glycoside hydrolase, family 13, N-terminal	TraesCS2B02G327300, TraesCS2D02G308600, TraesCS2A02G310300	AT2G36390, AT5G03650	TRITD2Bv1G155490					0.000270643	0.00365455	-0.860128	0.236176	56.3645	41.1579	37.8934	13.3628	27.2116	18.5898
TRITD7Bv1G047010	Very-long-chain 3-ketoacyl-CoA synthase	TraesCS7B02G113300, TraesCS7D02G208900, TraesCS7A02G206100		TRITD7Bv1G047010					0.00027496	0.00370302	-2.45018	0.673532	0.201334	0.173462	0.229526	0.0390257	0	0
TRITD3Av1G002730	Pectinesterase inhibitor domain	TraesCS3A02G010200, TraesCS3B02G012300		TRITD3Av1G002730					0.000276902	0.003721	-1.42821	0.392796	17.2727	13.8537	13.4196	2.51643	7.67105	2.26663
TRITD3Bv1G209260	Basic-leucine zipper domain	TraesCS3B02G404200, TraesCS3A02G371800, TraesCS3D02G364900	AT2G36270	TRITD3Bv1G209260	bZIP	AT1G49720.2	3e-46	abscisic acid responsive element-binding factor 1	0.000288712	0.00384501	-0.99492	0.274444	3.82346	2.69146	3.27394	0.882002	2.00367	0.954903
TRITD7Av1G024870	UDP-glucuronosyl/UDP-glucosyltransferase	TraesCSU02G190400, TraesCSU02G092700, TraesCS7D02G080900	AT5G65550, AT2G22590	TRITD7Av1G024870					0.000293749	0.00389715	-0.625218	0.172676	1.37389	1.68819	1.69464	0.687606	1.11677	0.78217
TRITD6Bv1G004060		TraesCS6B02G023700		TRITD6Bv1G004060					0.000295656	0.00391995	-1.11188	0.307229	438.964	398.607	252.121	72.544	172.4	126.902
TRITD7Bv1G233290	F-box-like domain superfamily	TraesCS7B02G498700, TraesCS7D02G546900, TraesCS7A02G563900		TRITD7Bv1G233290					0.000299552	0.00396405	-0.900555	0.249069	1.09674	1.49731	0.9915	0.587923	0.381947	0.471031
TRITD2Bv1G246800	Bifunctional inhibitor/plant lipid transfer protein/seed storage helical domain	TraesCS2B02G564300, TraesCS2A02G534000		TRITD2Bv1G246800					0.000299799	0.00396606	-1.69886	0.469887	95.5676	80.8459	60.6509	6.44055	30.8005	14.4816
TRITD7Av1G006210	Cytochrome P450	TraesCS7A02G029600, TraesCS7D02G026000	AT1G05160, AT2G32440	TRITD7Av1G006210					0.000300256	0.00396958	-0.993687	0.274873	9.43817	6.37137	6.42193	1.69303	3.00887	3.87391
TRITD2Bv1G006610	Cytochrome P450	TraesCS2B02G031200, TraesCS2D02G023400		TRITD2Bv1G006610					0.000309797	0.00407376	-0.90791	0.25171	0.883755	0.797819	0.719731	0.201884	0.459144	0.342589
TRITD1Bv1G006170	Proteinase inhibitor I13, potato inhibitor I	TraesCS1B02G034000, TraesCS1D02G027400, TraesCS1A02G041400		TRITD1Bv1G006170					0.000310818	0.0040859	-2.26669	0.628569	24.42	21.4654	13.7879	0.516327	2.28345	5.05084
TRITD7Bv1G041060	F-box domain	TraesCS7B02G098400, TraesCS7A02G193100, TraesCS7D02G194400		TRITD7Bv1G041060					0.000311666	0.00409189	-0.971462	0.269446	1.94299	1.67521	1.97566	0.404422	0.844838	0.981254
TRITD7Bv1G138710	Knottin, scorpion toxin-like	TraesCS7B02G244000, TraesCS1D02G012100		TRITD7Bv1G138710					0.000313475	0.00410917	-1.43657	0.398616	72.5108	76.6815	45.8249	9.95771	31.0743	10.9779
TRITD3Bv1G015090	Mandelate racemase/muconate lactonizing enzyme, C-terminal	TraesCS3B02G059700, TraesCS3D02G050400, TraesCS3A02G050800, TraesCS3D02G050300	AT3G18270	TRITD3Bv1G015090					0.000316512	0.00414118	-0.601945	0.167142	4.56225	5.3087	5.40962	2.51679	2.27194	3.80317
TRITD6Av1G038100	HAT, C-terminal dimerisation domain			TRITD6Av1G038100					0.000319117	0.00416903	-0.658282	0.182893	2.72268	2.57006	2.31625	1.04142	1.39472	1.54062
TRITD6Bv1G013460	Spen paralogue and orthologue SPOC, C-terminal	TraesCS6B02G061300, TraesCS6D02G052500, TraesCS6A02G044400		TRITD6Bv1G013460					0.0003204	0.00418024	-1.02226	0.2841	6.81834	4.99939	3.79671	1.25384	2.78709	1.72394
TRITD4Av1G256360	Pectinesterase inhibitor domain	TraesCS4A02G460800		TRITD4Av1G256360					0.000321866	0.0041915	-1.91795	0.533203	15.5993	17.5069	10.5542	0.869829	5.24011	1.93552
TRITD3Bv1G209270	Basic-leucine zipper domain	TraesCS3B02G404600	AT2G36270	TRITD3Bv1G209270	bZIP	AT2G36270.1	3e-55	bZIP family protein	0.000337088	0.00435301	-0.999147	0.278703	9.76319	6.25748	7.05239	1.9898	4.53517	2.39659
TRITD5Bv1G195620	Uncharacterised protein family UPF0114	TraesCS5B02G383400, TraesCS5D02G389300, TraesCS5A02G379800		TRITD5Bv1G195620					0.000344446	0.00443431	-0.756446	0.211336	2.18086	1.86056	1.96225	1.0847	0.634841	1.17237
TRITD6Bv1G167490	UspA	TraesCS6B02G312700, TraesCS6A02G274200, TraesCS6D02G254400	AT5G14680, AT3G01520	TRITD6Bv1G167490					0.000344373	0.00443431	-3.17005	0.885636	4.98503	5.72946	4.50466	0	0.63156	0.354153
TRITD7Av1G057290	Protein EXORDIUM-like	TraesCS7A02G178500, TraesCS7D02G180600, TraesCS7B02G084300		TRITD7Av1G057290					0.000355996	0.0045471	-1.67787	0.469898	8.97534	5.15917	4.1462	0.746602	0.660132	2.43629
TRITD3Bv1G154670	Zinc finger, RING-type	TraesCS3B02G293600, TraesCS3D02G260700, TraesCS3A02G260500	AT1G73760, AT1G36950, AT4G00070, AT1G17970	TRITD3Bv1G154670					0.000363851	0.00462839	-0.601349	0.168681	7.01644	6.75065	6.11461	2.7545	3.59193	4.85489
TRITD3Av1G243790	Zinc finger, RING-type	TraesCS3A02G425900, TraesCS3B02G462000		TRITD3Av1G243790					0.000364004	0.00462892	-1.48048	0.415293	2.83842	2.12055	3.20738	0.28488	1.21657	0.587977
TRITD7Av1G200000	UDP-glucuronosyl/UDP-glucosyltransferase	TraesCS7A02G370400, TraesCS7D02G352700, TraesCS7B02G258000	AT1G05530, AT1G05560, AT4G14090, AT4G15550	TRITD7Av1G200000					0.000365905	0.00465026	-0.910624	0.25554	1.11137	0.93747	0.712638	0.263092	0.459189	0.376885
TRITD7Av1G274610		TraesCS7A02G543800, TraesCSU02G225500, TraesCS7D02G529700, TraesCSU02G246300, TraesCS7B02G466000, TraesCS7B02G465900, TraesCS7B02G466100		TRITD7Av1G274610					0.000371532	0.00471029	-1.10594	0.310698	125.592	105.1	90.2551	21.2694	59.2318	34.8131
TRITD3Av1G003520	Pectinesterase inhibitor domain	TraesCS3A02G005700, TraesCS3D02G004800		TRITD3Av1G003520					0.000377367	0.00477411	-1.21094	0.340589	71.639	60.455	40.9424	10.5669	29.3586	15.3155
TRITD5Av1G166410	Non-haem dioxygenase N-terminal domain	TraesCS5A02G282800, TraesCS5D02G289800, TraesCS5B02G282100	AT1G49390, AT5G20400	TRITD5Av1G166410					0.000379695	0.00479628	-2.17387	0.611701	6.9639	6.2027	5.93959	0.381828	2.45504	0.36151
TRITD3Av1G264850	Glycoside hydrolase family 17	TraesCS3A02G481600, TraesCS3D02G476600, TraesCS3B02G526600	AT3G57240, AT3G57260, AT4G16260, AT3G57270	TRITD3Av1G264850					0.000380219	0.00479999	-0.692526	0.194889	2.63979	1.88732	1.95637	1.00534	1.11937	1.07714
TRITD1Av1G178290	MCM domain	TraesCS1A02G288700, TraesCS1D02G287700, TraesCS1B02G298100	AT3G09660	TRITD1Av1G178290					0.000384694	0.00484329	-0.584825	0.164722	2.64738	3.78242	4.55319	1.99553	1.85066	2.16054
TRITD4Av1G261440	Glycoside hydrolase, family 32	TraesCS4A02G485700, TraesCS7D02G009100	AT1G12240, AT1G62660	TRITD4Av1G261440					0.000387196	0.00487184	-0.660852	0.186226	28.7306	24.1045	22.8372	9.21047	16.0304	14.9672
TRITD5Av1G151070	Peptidase C19, ubiquitin carboxyl-terminal hydrolase	TraesCS5A02G246000, TraesCS5D02G252600, TraesCS5B02G243400	AT4G24560, AT5G65450	TRITD5Av1G151070					0.000390834	0.00490873	-0.740022	0.20868	1.23013	0.812755	1.25518	0.396039	0.689904	0.496798
TRITD5Av1G160910	NAD-dependent epimerase/dehydratase	TraesCS5A02G269200, TraesCS5D02G277400, TraesCS5B02G269500	AT1G76470	TRITD5Av1G160910					0.000393572	0.00494015	-0.626565	0.176778	4.73384	2.86582	3.40487	1.63922	2.33988	1.84625
TRITD5Av1G103740	Neprosin	TraesCS5A02G135200, TraesCS5B02G134000, TraesCS5D02G141700		TRITD5Av1G103740					0.000395787	0.00496347	-1.7023	0.480486	2.81309	1.82945	2.05208	0.152196	0.833378	0.434159
TRITD5Bv1G130230	FAD/NAD(P)-binding domain superfamily	TraesCS5B02G216000, TraesCS5A02G217200, TraesCS5D02G225200		TRITD5Bv1G130230					0.000399833	0.00500067	-1.2959	0.366052	36.673	32.5276	21.6678	4.19077	11.4105	11.1921
TRITD2Bv1G131770		TraesCS2B02G286900, TraesCS2D02G267100, TraesCS2A02G255600		TRITD2Bv1G131770					0.000401238	0.00501223	-1.35935	0.384077	3.7677	2.26399	1.75501	0.581557	0.435513	0.833805
TRITD1Av1G230360		TraesCS1A02G443300		TRITD1Av1G230360					0.000401538	0.00501448	-0.598383	0.169079	21.2146	22.0345	16.3111	8.2627	12.8091	12.064
TRITD1Bv1G206880	GDSL lipase/esterase	TraesCS1B02G407300, TraesCSU02G158200, TraesCSU02G168000, TraesCS1A02G382200, TraesCS1D02G390000, TraesCS1D02G389900		TRITD1Bv1G206880					0.000407249	0.00507364	-1.45064	0.410325	1.10105	0.660574	0.390009	0.217625	0.124242	0.107684
TRITD6Bv1G017630	F-box domain	TraesCS6B02G074900, TraesCS6A02G057600, TraesCS6D02G058800		TRITD6Bv1G017630					0.000409027	0.00509122	-0.638927	0.180785	1.91662	1.62442	1.89932	0.798653	1.15192	0.939977
TRITD7Av1G251300	GDSL lipase/esterase	TraesCS7A02G474700, TraesCS7D02G461700, TraesCS7B02G376300	AT1G31550, AT2G27360, AT1G28600, AT1G28640, AT1G28570, AT1G28670, AT1G28650, AT1G28610, AT1G28580, AT1G28660, AT1G28590	TRITD7Av1G251300					0.000410844	0.00510927	-2.81638	0.797161	0.3067	0.73902	0.908429	0	0	0.139827
TRITD3Bv1G259570	Protein of unknown function DUF538	TraesCS3B02G528900, TraesCS3A02G482500	AT1G02813, AT4G02360	TRITD3Bv1G259570					0.000414173	0.00514146	-1.08156	0.306315	10.894	13.6255	6.69398	2.17898	4.54215	3.87696
TRITD4Bv1G166960	Homeobox domain	TraesCS4B02G280700, TraesCS4D02G279300, TraesCS4A02G022700	AT2G16400, AT4G34610	TRITD4Bv1G166960	TALE	AT4G34610.2	1e-122	BEL1-like homeodomain 6	0.00042614	0.00526494	-0.879681	0.249672	1.10715	0.622569	0.83894	0.265594	0.472254	0.316859
TRITD1Av1G004320	PPM-type phosphatase, divalent cation binding	TraesCS6A02G037000, TraesCS6B02G051200		TRITD1Av1G004320					0.000428311	0.00528082	-0.601988	0.170922	2.53947	2.90116	2.56112	1.20305	1.36496	1.88695
TRITD1Bv1G177800	Bifunctional inhibitor/plant lipid transfer protein/seed storage helical domain	TraesCS1B02G330000, TraesCS1D02G317300		TRITD1Bv1G177800					0.000439478	0.00538664	-2.61398	0.743629	52.3677	5.48257	43.3514	1.21366	2.41672	1.62291
TRITD6Bv1G171570	Aldehyde dehydrogenase domain	TraesCS6B02G321400, TraesCS6D02G272400	AT3G48000, AT1G23800	TRITD6Bv1G171570					0.000441658	0.005407	-1.6307	0.464077	2.05971	2.12016	2.00654	0.155205	0.492436	0.791058
TRITD7Av1G040190	SANT/Myb domain	TraesCS7A02G135000, TraesCS7D02G135000, TraesCS7D02G135300, TraesCS7B02G036500	AT5G61620	TRITD7Av1G040190	MYB_related	AT5G58900.1	2e-19	Homeodomain-like transcriptional regulator	0.000443331	0.00542271	-0.813472	0.23157	2.46796	1.58767	1.9891	0.611782	1.22341	0.898667
TRITD4Bv1G172720	Tify domain	TraesCS4B02G297000, TraesCS4A02G007900, TraesCS4D02G295900		TRITD4Bv1G172720					0.000444595	0.00543498	-1.36409	0.388399	16.8928	14.3231	13.6737	2.38748	2.82576	8.1531
TRITD4Av1G007150	Homeobox domain	TraesCS4A02G022700, TraesCS4D02G279300, TraesCS4B02G280700	AT2G16400, AT4G34610	TRITD4Av1G007150	TALE	AT4G34610.2	1e-120	BEL1-like homeodomain 6	0.000446581	0.00545446	-1.27385	0.362826	0.892099	0.41612	0.380029	0.162064	0.103857	0.158801
TRITD3Av1G003400	Pectinesterase inhibitor domain	TraesCS3A02G006000, TraesCS5B02G564900		TRITD3Av1G003400					0.000448032	0.00546785	-0.984459	0.280469	97.3098	94.1063	58.5517	23.8384	48.0782	24.785
TRITD7Av1G275440	Glycoside hydrolase, family 13, N-terminal	TraesCS7A02G549200, TraesCS7B02G472400, TraesCS7D02G535500		TRITD7Av1G275440					0.000450185	0.00548723	-1.06656	0.303971	4.06597	1.9911	3.29589	0.806414	1.61177	0.836589
TRITD1Bv1G003190	Knottin, scorpion toxin-like	TraesCS1B02G018100, TraesCS1A02G014100		TRITD1Bv1G003190					0.000455631	0.00554551	-1.1349	0.323742	25.2196	14.0799	20.1708	3.90122	10.3196	5.69776
TRITD3Bv1G053970	Glycoside hydrolase, family 28	TraesCS3B02G148600, TraesCS3D02G130400, TraesCS3A02G129500	AT5G44830, AT3G15720, AT5G39910, AT5G27530, AT4G32370, AT5G44840, AT4G35670, AT5G17200	TRITD3Bv1G053970					0.000461371	0.00559902	-0.863672	0.246606	1.57442	1.0751	2.13441	0.615721	0.860984	0.500553
TRITD2Av1G173970	Peptidase S10, serine carboxypeptidase	TraesCS2A02G287100, TraesCS2D02G285600, TraesCS2B02G304000		TRITD2Av1G173970					0.000479825	0.00577425	-0.60237	0.172511	1.50062	1.84182	1.65875	0.912649	0.746978	1.10193
TRITD3Bv1G193580	TRAM/LAG1/CLN8 homology domain	TraesCS3B02G372000, TraesCS3A02G340400, TraesCS3D02G333900	AT4G10360	TRITD3Bv1G193580					0.000486783	0.00583608	-0.677433	0.194222	3.15837	2.61246	2.75461	1.19252	1.615	1.53237
TRITD4Bv1G052040	Aminotransferase, class I/classII	TraesCS4B02G124800, TraesCS4D02G153400, TraesCS4A02G145400	AT2G24850, AT4G23590, AT4G28420, AT4G23600, AT4G28410, AT2G20610	TRITD4Bv1G052040					0.000496525	0.00592948	-0.588874	0.169089	2.17312	1.77966	1.7969	1.11245	0.94616	1.12815
TRITD0Uv1G095470				TRITD0Uv1G095470					0.000507871	0.00604028	-2.22942	0.64127	1.0681	1.44349	1.1097	0	0.350459	0.0958823
TRITD4Av1G020880	SecY/SEC61-alpha family	TraesCS4A02G056500, TraesCS4B02G248500, TraesCS4D02G247900	AT1G78720, AT1G29310, AT2G34250	TRITD4Av1G020880					0.000508281	0.00604343	-1.40212	0.40333	13.2507	3.6976	11.5871	1.90487	2.20949	2.01473
TRITD7Av1G084640	FAD linked oxidase, N-terminal	TraesCS7A02G232400, TraesCS7B02G130800, TraesCS7D02G232500		TRITD7Av1G084640					0.000524137	0.00620013	-0.833036	0.240199	1.49264	1.95757	1.15657	0.471146	0.642352	0.904048
TRITD3Bv1G170330		TraesCS3B02G323300, TraesCS3D02G288300		TRITD3Bv1G170330					0.000525551	0.00621157	-0.685245	0.197626	0.849721	0.755074	0.636476	0.395267	0.290253	0.449405
TRITD5Bv1G139940	Oil body-associated protein-like	TraesCS5B02G241900, TraesCS5A02G239600, TraesCS5D02G250600	AT2G31985, AT1G05510	TRITD5Bv1G139940					0.000526648	0.00622101	-1.79769	0.518542	1.3091	0.673897	0.698623	0.137167	0.207019	0.0566378
TRITD7Av1G038860	SANT/Myb domain	TraesCS7A02G130700, TraesCS7B02G031000, TraesCS7D02G130100	AT5G55020, AT4G26930	TRITD7Av1G038860	MYB	AT2G32460.1	3e-67	myb domain protein 101	0.000532998	0.00627838	-0.77195	0.222875	8.85168	5.70488	5.76842	2.32736	4.22652	2.94954
TRITD0Uv1G033010	Gliadin/LMW glutenin	TraesCS4A02G453600, TraesCS7D02G031800		TRITD0Uv1G033010					0.000536423	0.00630966	-5.88924	1.70117	107.426	0.876212	119.644	0	0.0840917	0.0920258
TRITD4Av1G205530	Domain unknown function DUF295	TraesCS4A02G310900, TraesCS4D02G002600		TRITD4Av1G205530					0.000539061	0.00633712	-0.960864	0.277662	0.944894	0.980826	0.524709	0.211346	0.288265	0.420616
TRITD3Bv1G259870	Glycoside hydrolase family 17	TraesCS3B02G530500, TraesCS3A02G483700, TraesCS3D02G478800	AT3G57240, AT3G57260, AT4G16260, AT3G57270	TRITD3Bv1G259870					0.000544133	0.00638055	-0.932399	0.269633	24.7495	18.4304	18.4366	5.10372	12.282	8.28516
TRITD0Uv1G104480	Pectinesterase inhibitor domain	TraesCS6B02G064100, TraesCS6D02G055000		TRITD0Uv1G104480					0.000543994	0.00638055	-1.33573	0.386262	89.4121	78.2586	43.5995	11.4553	32.9493	14.8848
TRITD6Bv1G013790	Pectinesterase inhibitor domain	TraesCS6B02G064100, TraesCS6D02G055000		TRITD6Bv1G013790					0.000543994	0.00638055	-1.33573	0.386262	89.4121	78.2586	43.5995	11.4553	32.9493	14.8848
TRITD5Av1G114980	Asparagine synthase	TraesCS5A02G153900, TraesCS5D02G159100, TraesCS5B02G152600		TRITD5Av1G114980					0.000545218	0.00638854	-0.938941	0.271567	21.6786	26.8325	24.5396	8.50045	6.47025	15.7338
TRITD3Av1G267060	Primosome PriB/single-strand DNA-binding	TraesCS3A02G488800, TraesCS3D02G484500, TraesCS3B02G536700		TRITD3Av1G267060					0.000548709	0.00642157	-0.741102	0.214453	5.8226	9.70883	8.03748	4.28792	2.71966	4.26146
TRITD0Uv1G033040	Gliadin/LMW glutenin	TraesCS4A02G453405, TraesCS7D02G032000		TRITD0Uv1G033040					0.000549294	0.00642328	-3.56122	1.0306	240.76	12.041	260.451	2.51434	3.83875	1.75161
TRITD7Bv1G017710	AP2/ERF domain	TraesCS7B02G048100, TraesCS7A02G145800, TraesCS7D02G147100, TraesCS7D02G147200		TRITD7Bv1G017710	ERF	AT5G25190.1	4e-52	ERF family protein	0.000562142	0.00654155	-2.27939	0.660837	0.859244	0.733723	0.584477	0.225287	0	0
TRITD3Bv1G084400				TRITD3Bv1G084400					0.000562767	0.00654568	-0.779129	0.225903	0.919611	0.833384	0.56895	0.421366	0.340313	0.28778
TRITD6Av1G085330	Cytochrome P450	TraesCS6A02G185100, TraesCS6B02G213300, TraesCS6D02G172200		TRITD6Av1G085330					0.000563502	0.0065524	-1.54731	0.448677	2.53747	1.11415	0.75024	0.161409	0.271684	0.430952
TRITD1Av1G007690	ACT domain	TraesCS1A02G036100, TraesCS1B02G046300, TraesCS1D02G037700	AT2G39570	TRITD1Av1G007690					0.00057416	0.00665568	-0.76498	0.22215	2.48247	1.95686	3.70754	1.37515	1.21994	1.08162
TRITD3Bv1G242500	Protein kinase domain	TraesCS3B02G477400, TraesCS3D02G436200, TraesCS3A02G443800	AT3G26700	TRITD3Bv1G242500					0.0005743	0.00665568	-0.812991	0.236096	2.41366	1.67679	1.8956	0.857614	0.629643	1.20278
TRITD3Bv1G246210	Knottin, scorpion toxin-like superfamily	TraesCS3B02G488700, TraesCS3A02G451300		TRITD3Bv1G246210					0.000575226	0.00666271	-1.14402	0.332272	226.814	232.094	137.259	41.3675	106.845	53.7472
TRITD1Bv1G215690	FBD domain			TRITD1Bv1G215690					0.000576253	0.0066672	-1.48673	0.431869	1.2065	0.857945	0.80495	0.217878	0.0823365	0.405473
TRITD1Bv1G173190	Tapetum determinant 1	TraesCS1B02G318300, TraesCS1A02G307500, TraesCS1D02G306900		TRITD1Bv1G173190					0.000585664	0.00676107	-1.11878	0.325401	135.229	89.8815	54.8998	19.7168	37.9624	31.5682
TRITD3Av1G044080	Tetratricopeptide-like helical domain superfamily	TraesCS3D02G127500, TraesCS3B02G145700, TraesCS3B02G145800		TRITD3Av1G044080					0.000604181	0.0069212	-2.71195	0.790717	0.829879	1.34274	1.30498	0	0	0
TRITD4Av1G045750	Gnk2-homologous domain	TraesCS4A02G099000, TraesCS4D02G206200, TraesCS4B02G205300	AT5G48540	TRITD4Av1G045750					0.000605975	0.00693603	-1.20047	0.3501	1.80278	0.72452	1.06084	0.221121	0.39344	0.384496
TRITD4Av1G194720	CH domain superfamily	TraesCS4A02G272600, TraesCS4B02G041500, TraesCS4D02G038800		TRITD4Av1G194720					0.000620852	0.00707524	-0.669339	0.195579	9.20977	5.23702	8.20363	3.14951	4.45762	3.82859
TRITD7Av1G025010		TraesCS7A02G086700, TraesCS7D02G081500		TRITD7Av1G025010					0.000621653	0.00708243	-0.92016	0.268896	75.2655	53.5756	45.5708	15.3824	33.6321	22.7735
TRITD1Bv1G154150	UspA	TraesCS1B02G278500, TraesCS1D02G267700, TraesCS1A02G267800	AT1G44760	TRITD1Bv1G154150					0.000634599	0.00721015	-0.615386	0.180128	7.77323	10.2071	8.28457	3.93823	4.1186	6.45538
TRITD2Av1G251570	WRC domain	TraesCS2A02G435100, TraesCS2D02G435200, TraesCS2B02G458400		TRITD2Av1G251570	GRF	AT3G13960.1	7e-49	growth-regulating factor 5	0.00063871	0.00723721	-0.802761	0.235095	1.8342	1.74482	2.30702	1.15938	0.557565	1.00272
TRITD7Bv1G207330		TraesCS7B02G398700, TraesCS7A02G492700, TraesCS7A02G492600		TRITD7Bv1G207330					0.000639843	0.00724808	-1.28205	0.375511	0.78604	1.51461	1.52239	0.286105	0.517142	0.212238
TRITD3Bv1G001400	Pectinesterase inhibitor domain	TraesCS3B02G008800, TraesCS3D02G005600		TRITD3Bv1G001400					0.000648015	0.00731283	-1.18166	0.34646	22.2224	16.9199	7.06547	4.23586	3.90535	4.57768
TRITD4Av1G216910	GAF domain		AT2G40940	TRITD4Av1G216910					0.000656363	0.00738073	-1.28098	0.375964	8.05751	4.64781	7.27159	0.927391	2.91838	2.14655
TRITD6Av1G089790		TraesCS6B02G326900		TRITD6Av1G089790					0.00065976	0.0074053	-0.591486	0.173672	9.69887	7.49935	7.21106	4.82841	4.78268	3.86265
TRITD0Uv1G015960	Cystatin domain	TraesCS2B02G501800, TraesCS2D02G477600		TRITD0Uv1G015960					0.000662624	0.00743545	-0.889077	0.26114	211.261	249.728	144.116	54.7565	95.2749	103.098
TRITD1Av1G050310	Protein kinase domain	TraesCS1A02G114900, TraesCS1D02G116300, TraesCS1B02G134800		TRITD1Av1G050310					0.00066587	0.00746418	-0.728992	0.214204	9.63452	8.15756	5.13376	3.00158	4.27266	3.57518
TRITD5Bv1G150250	JmjC domain	TraesCS5B02G265200, TraesCS5D02G273400, TraesCS5A02G265500	AT3G20810	TRITD5Bv1G150250					0.000671978	0.00752219	-0.662728	0.194876	17.0948	18.1944	18.9313	9.92579	12.665	6.5024
TRITD7Bv1G224940	FAD linked oxidase, N-terminal	TraesCS7B02G455000, TraesCS7A02G536900, TraesCSU02G106300	AT5G21482	TRITD7Bv1G224940					0.00067191	0.00752219	-0.744917	0.219042	3.30911	2.89802	2.43941	1.43733	0.932579	1.85735
TRITD5Av1G002820	Lipoxygenase	TraesCS5A02G007900, TraesCS5D02G013400, TraesCS5B02G006500	AT3G45140	TRITD5Av1G002820					0.000683797	0.00762379	-0.759561	0.223664	0.844117	1.0578	1.26291	0.394685	0.405758	0.715678
TRITD4Bv1G203890	PPM-type phosphatase domain	TraesCS4B02G381900, TraesCS5A02G547900, TraesCS4D02G357800	AT3G09400, AT5G02400	TRITD4Bv1G203890					0.00069008	0.00767537	-1.16243	0.342548	1.30862	0.7755	0.981825	0.184583	0.554521	0.283192
TRITD2Av1G016810	Signal transduction response regulator, receiver domain	TraesCS2A02G072300, TraesCS2B02G086400, TraesCS2B02G086500, TraesCS2B02G087100, TraesCS2D02G070900		TRITD2Av1G016810					0.000695225	0.00771612	-1.12574	0.331933	12.3399	8.15151	5.38431	1.64202	3.12484	3.50718
TRITD2Av1G233350	Oxoglutarate/iron-dependent dioxygenase	TraesCS2A02G394900, TraesCS2B02G412900, TraesCS2D02G392900	AT4G10490, AT4G10500	TRITD2Av1G233350					0.000700346	0.0077647	-0.712555	0.210228	3.29872	2.20727	1.78411	0.993499	1.33858	1.13641
TRITD4Bv1G098450	Homeobox-like domain superfamily	TraesCS4B02G155200, TraesCS4A02G139000, TraesCS4D02G167100		TRITD4Bv1G098450					0.000718393	0.00790801	-1.01981	0.3015	2.57572	1.04537	2.34483	0.788087	0.552955	0.678702
TRITD4Av1G054470	Gamma interferon inducible lysosomal thiol reductase GILT	TraesCS4A02G112300, TraesCS4D02G192900, TraesCS4B02G191700	AT1G07080	TRITD4Av1G054470					0.000718191	0.00790801	-2.91569	0.861983	22.0156	1.67073	23.1511	0.523399	0.42703	0.533286
TRITD7Av1G193160	Inositol oxygenase	TraesCS7A02G357800, TraesCS7B02G269900, TraesCS7D02G364900	AT1G14520, AT5G56640, AT4G26260, AT2G19800	TRITD7Av1G193160					0.000722134	0.00794291	-1.15404	0.341327	8.82377	5.22957	7.55937	1.23164	2.52313	3.50837
TRITD6Av1G119740	Zinc finger, RING-type	TraesCS6B02G225000, TraesCS6D02G187600	AT4G10150, AT5G10380, AT4G10160, AT1G33480, AT4G24015	TRITD6Av1G119740					0.000734684	0.00805544	-0.605504	0.17934	4.83306	4.58557	3.82109	2.71471	1.92665	2.6275
TRITD0Uv1G065880	GDSL lipase/esterase	TraesCS7B02G467100, TraesCS7D02G530700, TraesCS5A02G517500		TRITD0Uv1G065880					0.000750989	0.00819757	-1.06931	0.317279	24.4492	26.1298	34.2869	6.09163	8.67326	16.9648
TRITD6Av1G183770	Potassium transporter	TraesCS6A02G294200, TraesCS6D02G275100, TraesCS6B02G324800		TRITD6Av1G183770					0.000752035	0.00820627	-0.634785	0.188371	0.82036	0.863552	0.668343	0.352511	0.469262	0.422913
TRITD1Av1G018200	Neprosin	TraesCS1A02G059300, TraesCS1D02G060700		TRITD1Av1G018200					0.000763736	0.00831703	-1.08452	0.322235	14.5323	15.429	8.07805	2.91405	6.68601	3.61731
TRITD1Bv1G001870	Gliadin/LMW glutenin	TraesCS1D02G001200, TraesCS1B02G010600		TRITD1Bv1G001870					0.000772467	0.00838374	-5.62316	1.67233	705.986	4.61048	680.591	0.40838	0.610616	0.377067
TRITD2Bv1G012310	NB-ARC	TraesCS2B02G052400, TraesCS7D02G039900, TraesCS7D02G039700, TraesCSU02G205300		TRITD2Bv1G012310					0.00077411	0.0083972	-0.774447	0.230361	2.93557	3.86901	3.52001	1.5714	1.08479	2.28948
TRITD0Uv1G055800	Pectinesterase inhibitor domain	TraesCS6B02G064100, TraesCS6D02G055000		TRITD0Uv1G055800					0.000779266	0.00843659	-1.25327	0.372991	28.0524	23.9821	13.9482	3.45735	10.0441	6.31094
TRITD2Bv1G262840	Plant peroxidase	TraesCS2B02G615700, TraesCS2A02G571500, TraesCS2D02G583100		TRITD2Bv1G262840					0.000785773	0.00849278	-1.4255	0.42454	1.32068	2.09961	1.28693	0.193498	0.292691	0.775497
TRITD1Bv1G118370	Protein response to low sulfur	TraesCS1B02G201100, TraesCS1A02G179400, TraesCS1D02G177700		TRITD1Bv1G118370					0.000801739	0.00863178	-0.679225	0.202621	6.15194	9.59315	10.7476	4.95862	4.15482	3.98112
TRITD2Bv1G167700	Ribonuclease H2 subunit B, wHTH domain		AT4G20325	TRITD2Bv1G167700					0.000806546	0.00866788	-0.599313	0.178871	3.67258	3.48658	4.27563	2.81564	2.07446	1.55645
TRITD7Bv1G068500	JmjC domain	TraesCS7B02G145500, TraesCS7D02G244500, TraesCS7A02G246000	AT3G20810	TRITD7Bv1G068500					0.000809815	0.00869181	-0.687562	0.205278	2.78811	3.03135	4.24307	2.15095	1.30278	1.61873
TRITD4Bv1G173440	SANT/Myb domain	TraesCS4B02G299000, TraesCS4D02G297900, TraesCS4A02G006100		TRITD4Bv1G173440	MYB	AT2G23290.1	1e-49	myb domain protein 70	0.000821407	0.00879359	-0.744727	0.222607	9.39065	6.25232	6.47684	2.42802	4.53789	3.71765
TRITD1Av1G207440				TRITD1Av1G207440					0.000823218	0.00881071	-0.87954	0.262952	50.4002	33.255	44.0648	12.7131	27.7383	15.1751
TRITD1Av1G224720		TraesCS1A02G426600, TraesCS1D02G436000, TraesCS1B02G460900		TRITD1Av1G224720					0.000833954	0.00890096	-0.833983	0.2496	1330.51	1248.55	787.419	339.685	649.097	490.249
TRITD4Av1G211730	Aspartic peptidase A1 family	TraesCS4A02G328100, TraesCS5D02G545600, TraesCSU02G217000		TRITD4Av1G211730					0.000837067	0.00892229	-1.10375	0.330439	4.71069	4.78601	3.01299	0.80926	2.2768	1.32626
TRITD5Av1G063860	Ureide permease	TraesCS5A02G104200, TraesCS5B02G114400, TraesCS5D02G116600	AT1G26440, AT2G03520, AT2G03590, AT2G03530, AT2G03600	TRITD5Av1G063860					0.000867117	0.00917459	-0.611911	0.183733	4.20845	2.21423	3.006	1.68644	1.59761	1.66857
TRITD5Bv1G163380		TraesCS5B02G298100, TraesCS5D02G305600		TRITD5Bv1G163380					0.000868619	0.00918349	-0.82475	0.247676	19.9417	17.52	16.3106	5.03573	11.5547	8.27589
TRITD6Bv1G044970	Glycosyltransferase 2-like	TraesCS6B02G135100, TraesCS6D02G094300, TraesCS6A02G105800	AT2G35650	TRITD6Bv1G044970					0.000883281	0.00930547	-0.662849	0.199336	5.04939	5.67904	4.27633	3.21916	1.80513	2.91577
TRITD7Av1G275330	Glycoside hydrolase, family 19, catalytic	TraesCS7A02G548000, TraesCS7B02G471500		TRITD7Av1G275330					0.000897352	0.00941406	-1.57287	0.473632	1.48962	0.872937	1.14495	0.19731	0.536578	0.0978674
TRITD2Bv1G141660	Short-chain dehydrogenase/reductase SDR	TraesCS2B02G302200, TraesCS2A02G285100, TraesCS2D02G284000	AT5G50700, AT5G50770, AT5G50600, AT5G50590, AT3G47360, AT5G50690, AT3G47350	TRITD2Bv1G141660					0.000901184	0.00944634	-1.50437	0.453166	2.12767	0.909925	0.952169	0.110071	0.292131	0.457098
TRITD4Bv1G177100	Small GTPase	TraesCS4B02G306900, TraesCS4A02G407500, TraesCS4D02G305100	AT5G64990, AT2G22290, AT5G10260, AT4G39890	TRITD4Bv1G177100					0.000907232	0.00949781	-0.799029	0.24083	4.73052	3.65125	3.98953	1.17017	2.56856	2.06114
TRITD6Av1G004800	P-loop containing nucleoside triphosphate hydrolase	TraesCS6A02G026300, TraesCS6D02G030100, TraesCS6B02G037000		TRITD6Av1G004800					0.000917886	0.00958047	-0.909524	0.274403	0.559135	0.50771	0.448206	0.197471	0.269969	0.14772
TRITD2Bv1G182460	Caleosin-related	TraesCS2B02G384600, TraesCS2D02G364100, TraesCS2A02G367200	AT2G33380, AT5G55240, AT5G29560, AT4G26740	TRITD2Bv1G182460					0.000920714	0.00960518	-1.08741	0.328156	5.83201	2.40897	6.36932	1.51823	1.85282	1.20693
TRITD0Uv1G073730		TraesCS1B02G449900, TraesCS1A02G419700, TraesCS1D02G427700		TRITD0Uv1G073730					0.000922532	0.00961934	-4.23605	1.27856	24.8417	25.2846	22.2301	0.000194054	0.290763	3.25681
TRITD4Av1G211180	Flavin monooxygenase FMO	TraesCS4A02G325400, TraesCS5B02G538300, TraesCS5D02G556600, TraesCS6B02G033700	AT1G21430, AT1G48910	TRITD4Av1G211180					0.000940327	0.00976582	-2.73553	0.826995	5.31201	0.531531	5.83898	0.0807799	0.252793	0.167305
TRITD4Bv1G172710	Tify domain	TraesCS4B02G296900, TraesCS4D02G295800, TraesCS4A02G008000		TRITD4Bv1G172710					0.000963407	0.00997074	-1.47715	0.447487	2.28533	1.45499	1.24891	0.223347	0.257764	0.64263
TRITD7Bv1G013800	SANT/Myb domain	TraesCS7B02G036500, TraesCS7A02G135000, TraesCS7D02G135000, TraesCS7D02G135300	AT5G61620	TRITD7Bv1G013800	MYB_related	AT5G58900.1	3e-20	Homeodomain-like transcriptional regulator	0.000965899	0.00998414	-0.820434	0.248596	3.05862	2.23024	2.85254	0.864521	1.87558	1.02048
TRITD1Av1G168330		TraesCS1A02G268300, TraesCS1D02G268200, TraesCS1B02G278900		TRITD1Av1G168330					0.000967727	0.00999561	-1.85877	0.563307	5.0334	3.42638	5.54395	0.272327	1.80528	0.333214
TRITD6Av1G025630	Putative F-box protein At1g67623-like	TraesCS6A02G095200, TraesCS6D02G088200, TraesCS6B02G123200		TRITD6Av1G025630					0.00097361	0.0100216	-0.580049	0.175877	3.94407	3.26426	2.43198	1.44285	2.09067	1.82242
TRITD7Av1G005870	Pectinesterase inhibitor domain	TraesCS7A02G028100, TraesCS5D02G561900		TRITD7Av1G005870					0.000998356	0.0102158	-1.31554	0.39974	43.6825	41.3523	26.7851	5.09572	18.3293	10.102
TRITD6Bv1G190230		TraesCS6B02G355200, TraesCS6A02G324900		TRITD6Bv1G190230					0.00102099	0.0103964	-0.987946	0.300774	1.2928	1.17492	2.24255	0.471305	0.561825	0.615971
TRITD4Bv1G140150		TraesCS4B02G231000, TraesCS4A02G075100, TraesCS4D02G232500		TRITD4Bv1G140150					0.00103059	0.0104788	-1.40471	0.427998	19.234	14.9126	13.7858	2.14766	8.74759	3.09299
TRITD0Uv1G026990	Ribosome-inactivating protein	TraesCS3B02G577000		TRITD0Uv1G026990					0.00107183	0.0108163	-0.626414	0.191508	1.73446	1.59409	1.64119	1.05159	0.640885	1.02015
TRITD6Bv1G196330	WRC domain	TraesCS6B02G366700, TraesCS6A02G335900, TraesCS6D02G315700	AT2G06200, AT3G13960	TRITD6Bv1G196330	GRF	AT3G13960.1	1e-56	growth-regulating factor 5	0.00107318	0.0108273	-0.653023	0.199664	3.61731	5.80922	6.31276	2.87464	2.19379	2.9928
TRITD2Av1G247960	Bifunctional inhibitor/plant lipid transfer protein/seed storage helical domain	TraesCS2A02G424861, TraesCS2D02G422800		TRITD2Av1G247960					0.00107529	0.0108434	-1.59276	0.487076	0.623989	0.343944	0.312931	0.0870929	0.148472	0.0270801
TRITD7Bv1G033930	Protein EXORDIUM-like	TraesCS7B02G084300, TraesCS7D02G180600, TraesCS7A02G178500		TRITD7Bv1G033930					0.0010997	0.0110335	-0.862352	0.264226	7.54839	5.30252	4.12619	1.64161	2.31046	3.27792
TRITD4Av1G051470	Protein kinase domain	TraesCS4A02G108800, TraesCS4B02G195900, TraesCS4D02G196100	AT3G01090, AT3G29160	TRITD4Av1G051470					0.00111679	0.0111673	-0.628148	0.192723	25.8465	20.6183	28.0311	15.886	9.4238	15.3839
TRITD3Av1G280590	Acyl-CoA oxidase, C-terminal		AT4G16760, AT2G35690	TRITD3Av1G280590					0.00111957	0.0111898	-1.36669	0.419408	0.578639	0.415845	0.494681	0.155919	0.177202	0.0581962
TRITD6Av1G202670	BES1/BZR1 plant transcription factor, N-terminal	TraesCS6A02G338000, TraesCS6D02G318800, TraesCS6B02G368700	AT1G78700	TRITD6Av1G202670	BES1	AT1G78700.1	1e-60	BES1/BZR1 homolog 4	0.0011267	0.0112302	-1.14393	0.351243	1.23755	1.31493	0.752134	0.172865	0.45788	0.453603
TRITD5Av1G032680	F-box domain	TraesCS5A02G065800, TraesCS5D02G077000, TraesCS5B02G072800		TRITD5Av1G032680					0.00114545	0.0113741	-0.748678	0.230212	1.02114	0.779715	0.84658	0.271119	0.506287	0.503686
TRITD3Av1G245100	Nucleotide-diphospho-sugar transferase	TraesCS3A02G428700, TraesCS3B02G466300, TraesCS3D02G424300	AT5G40900	TRITD3Av1G245100					0.00116149	0.0114822	-1.07943	0.33232	0.9536	0.959211	1.12475	0.222337	0.252437	0.656102
TRITD5Bv1G001230	Proton-dependent oligopeptide transporter family	TraesCS5B02G001100, TraesCS5A02G004400, TraesCS5D02G012500	AT3G47960, AT5G62680, AT1G18880	TRITD5Bv1G001230					0.0012141	0.0118673	-0.788902	0.243823	1.05959	0.849811	1.089	0.543042	0.594684	0.279376
TRITD1Av1G002120	Gliadin/LMW glutenin	TraesCS1A02G007300, TraesCS1B02G010500, TraesCS1B02G010400, TraesCS1D02G001100, TraesCS1D02G001000		TRITD1Av1G002120					0.0012244	0.0119483	-5.25374	1.62497	229.438	1.66116	215.062	0.225893	0.188248	0.209492
TRITD6Av1G009830	Gliadin/LMW glutenin	TraesCS6A02G049400, TraesCS6A02G049600, TraesCSU02G108205, TraesCSU02G108098		TRITD6Av1G009830					0.00123994	0.0120717	-4.54042	1.40591	47.1989	0.684293	47.609	0.0731195	0.128137	0.115737
TRITD6Av1G183930	Zf-FLZ domain	TraesCS6A02G295600, TraesCS6D02G276200, TraesCS6B02G325700		TRITD6Av1G183930					0.00124343	0.0120972	-1.02077	0.316153	18.2829	13.4184	15.2782	3.07747	8.46134	6.73397
TRITD6Bv1G071240	Caleosin-related	TraesCS6B02G188300, TraesCS6A02G162900, TraesCS6D02G149300	AT1G70680, AT1G70670, AT1G23240, AT1G23250	TRITD6Bv1G071240					0.00124466	0.0121036	-0.81921	0.253748	2.94036	1.70087	1.62356	0.821649	0.767128	1.06003
TRITD5Bv1G144460	Neprosin	TraesCS5B02G253800, TraesCS5D02G262600, TraesCS5A02G254700		TRITD5Bv1G144460					0.00125276	0.0121681	-0.922	0.285751	49.3284	39.6569	30.31	9.47928	20.7265	19.2561
TRITD3Av1G031430	Transcription factor TGA like domain	TraesCS3A02G103500, TraesCS3D02G105800, TraesCS3B02G120900		TRITD3Av1G031430					0.00125425	0.0121797	-0.756837	0.234587	2.18293	1.5963	1.69196	0.608596	1.28703	0.754532
TRITD1Bv1G153430	Fungal lipase-like domain	TraesCS1B02G277000, TraesCS1D02G266200, TraesCS1A02G266000		TRITD1Bv1G153430					0.00126073	0.0122284	-3.31882	1.02916	21.2041	4.99182	3.41872	0.0510845	0.205497	1.25047
TRITD3Bv1G274880	NTF2-like domain superfamily	TraesCSU02G053800, TraesCS3A02G516200, TraesCS3D02G523900	AT5G04830	TRITD3Bv1G274880					0.00126942	0.0122899	-2.38137	0.738913	1.32947	1.29572	1.07572	0.249084	0.186849	0
TRITD7Av1G245570				TRITD7Av1G245570					0.00128345	0.0123912	-3.35382	1.04167	1.14783	1.7453	1.05112	0	0	0
TRITD1Bv1G117270	Glycoside hydrolase, family 37	TraesCS1B02G197900, TraesCS1A02G183000, TraesCS1D02G186500	AT4G24040	TRITD1Bv1G117270					0.00128456	0.012399	-0.813724	0.252756	2.21162	1.96966	1.39194	0.645132	0.653008	1.2313
TRITD1Av1G169750	Yip1 domain	TraesCS1A02G272600, TraesCS1D02G272100	AT2G18840, AT4G30260	TRITD1Av1G169750					0.00128622	0.0124092	-0.870273	0.270352	6.12324	4.47654	3.11988	2.41114	2.03782	1.27379
TRITD4Av1G237900	S-phase kinase-associated protein 1-like	TraesCS4A02G379700		TRITD4Av1G237900					0.00129298	0.0124608	-0.955247	0.296888	2.90447	2.72387	2.30259	1.01595	1.14268	0.833619
TRITD6Bv1G050200	NB-ARC	TraesCSU02G135400		TRITD6Bv1G050200					0.001317	0.0126652	-1.98083	0.61665	0.134408	0.217296	0.287442	0.014652	0.0333434	0.0182447
TRITD5Bv1G145010	Peptidase S8/S53 domain	TraesCS5B02G255200, TraesCS5A02G255900, TraesCS5D02G264000	AT5G59810, AT2G04160	TRITD5Bv1G145010					0.0013433	0.0128795	-0.900371	0.28079	3.77041	2.63442	2.29793	0.712403	1.414	1.52662
TRITD6Av1G080520		TraesCS6A02G179500, TraesCS6B02G145000, TraesCS2D02G361300	AT4G02550	TRITD6Av1G080520					0.00135318	0.0129623	-2.25834	0.704751	0.682155	0.325964	0.24338	0.0819398	0	0.0513268
TRITD5Bv1G252520		TraesCS5B02G566600		TRITD5Bv1G252520					0.00136239	0.0130326	-1.47182	0.459585	71.9779	69.3975	41.4295	7.95763	31.4208	9.95018
TRITD7Av1G009720	Glycosyl transferase, family 1	TraesCS4A02G446700, TraesCS7D02G036600	AT3G43190, AT5G20830	TRITD7Av1G009720					0.00137205	0.0131009	-0.9295	0.290426	2.74267	1.43158	3.34134	1.10494	1.04765	0.693565
TRITD3Bv1G041170	NAC domain	TraesCS3A02G107400, TraesCS3D02G109400, TraesCS3B02G126200	AT5G56620, AT4G29230	TRITD3Bv1G041170	NAC	AT4G29230.1	1e-150	NAC domain containing protein 75	0.00138137	0.0131693	-0.780503	0.24402	0.945736	1.01733	1.64081	0.554492	0.70717	0.37842
TRITD1Av1G021620	11-S seed storage protein, plant	TraesCS1A02G066100, TraesCS1D02G067100, TraesCS1B02G084300	AT5G44120, AT1G03880, AT4G28520, AT1G03890	TRITD1Av1G021620					0.00139529	0.0132711	-5.67572	1.77609	38.8647	0.180726	32.0086	0.033248	0	0
TRITD2Av1G005930	Adaptor protein ClpS, core	TraesCS2A02G022700, TraesCS2D02G023900, TraesCS2B02G031800		TRITD2Av1G005930					0.00139769	0.013291	-1.85597	0.580875	0.839471	1.40839	1.35452	0.163286	0.184014	0.106983
TRITD1Bv1G222370		TraesCS1B02G460900, TraesCS1A02G426600, TraesCS1D02G436000		TRITD1Bv1G222370					0.00140815	0.0133631	-0.723632	0.226633	254.091	205.861	148.418	79.6996	134.569	83.0679
TRITD3Bv1G229910	GH3 family	TraesCS3B02G353200, TraesCS3D02G317600, TraesCS3A02G324100		TRITD3Bv1G229910					0.00144908	0.0136643	-0.794839	0.249581	0.829015	0.844449	1.20455	0.415627	0.291267	0.628973
TRITD6Bv1G000910	Neprosin	TraesCS6B02G006100, TraesCS6A02G001400, TraesCS6D02G010900		TRITD6Bv1G000910					0.00145184	0.0136756	-1.17755	0.369817	6.1688	4.39355	3.18498	0.768899	2.34854	1.38391
TRITD3Bv1G263440	Protein kinase domain	TraesCS3B02G544400, TraesCS3D02G491800	AT3G01090, AT3G29160	TRITD3Bv1G263440					0.00145709	0.013712	-0.844072	0.265173	1.05678	0.664063	0.76073	0.253266	0.549303	0.289809
TRITD2Bv1G170470	AAA+ ATPase domain	TraesCS2B02G360100, TraesCS2D02G340400, TraesCS2A02G322600	AT4G24790	TRITD2Bv1G170470					0.00146981	0.0138098	-0.822053	0.25846	0.284652	0.337808	0.480465	0.13757	0.161096	0.170013
TRITD1Av1G178020	Bifunctional purine biosynthesis protein PurH-like	TraesCS1A02G288300, TraesCS1D02G287300, TraesCS1B02G297700	AT2G35040	TRITD1Av1G178020					0.00149546	0.0139934	-0.586217	0.184603	1.45761	1.21325	1.11744	0.610194	0.714836	0.779563
TRITD6Bv1G005530	NB-ARC	TraesCS6B02G030900	AT3G07040	TRITD6Bv1G005530					0.00153844	0.0143096	-2.56617	0.8102	0.0682222	0.0784915	0.0778496	0	0	0
TRITD7Bv1G221040		TraesCS7B02G440500, TraesCS7D02G512700		TRITD7Bv1G221040					0.00154077	0.014328	-1.73301	0.547226	4.74713	2.7314	5.55013	0.43461	1.93133	0.265203
TRITD7Av1G013470		TraesCS7A02G055800, TraesCS7D02G050400		TRITD7Av1G013470					0.00158436	0.0146161	-1.21813	0.385633	1.66771	1.41678	1.89431	0.228613	0.85918	0.562579
TRITD0Uv1G054820	Cytochrome P450	TraesCSU02G084800, TraesCS5B02G548600, TraesCS5A02G287700, TraesCS5D02G295800, TraesCS5B02G548400, TraesCS5B02G287300, TraesCS5A02G287800, TraesCS4A02G339100, TraesCS5D02G535400, TraesCS5D02G295700, TraesCS5B02G287400, TraesCS5A02G495200, TraesCS5A02G288000		TRITD0Uv1G054820					0.00160036	0.0147246	-2.07439	0.657319	1.62543	0.894087	1.33902	0.0859375	0.0604034	0.546102
TRITD2Av1G206010	Cytochrome P450	TraesCS2A02G325100, TraesCS2D02G337800, TraesCS2B02G357200		TRITD2Av1G206010					0.00161499	0.01482	-0.82899	0.262906	2.07156	2.43187	1.6905	0.619986	0.805817	1.41095
TRITD2Av1G002170		TraesCS2B02G012700, TraesCS2D02G010000		TRITD2Av1G002170					0.00162218	0.0148695	-1.56633	0.496949	27.056	23.2369	18.234	2.28941	11.923	3.74715
TRITD1Bv1G208440	Purine permease, plant	TraesCS1B02G413300, TraesCS1D02G393900, TraesCS1A02G385800	AT1G30840	TRITD1Bv1G208440					0.00162728	0.0149032	-0.948283	0.300949	8.82195	6.45144	5.79719	1.68282	2.62958	4.36015
TRITD0Uv1G022120	Protein kinase domain	TraesCS3B02G001000, TraesCS2D02G019800		TRITD0Uv1G022120					0.00162801	0.0149066	-2.56122	0.812868	0.222644	0.143757	0.362467	0	0	0
TRITD4Av1G244920	Cysteine peptidase, cysteine active site	TraesCS4A02G422300, TraesCS7D02G060100		TRITD4Av1G244920					0.0016297	0.0149188	-1.44097	0.457373	5.50333	5.01751	3.15278	0.835147	2.38363	0.554682
TRITD3Bv1G145360	B3 DNA binding domain	TraesCS3B02G278000, TraesCS3A02G249100, TraesCS3D02G249100	AT3G26790, AT1G28300	TRITD3Bv1G145360	B3	AT3G26790.1	4e-43	B3 family protein	0.00166701	0.0152103	-0.684699	0.217785	1.97319	1.68868	1.36548	1.00956	0.80104	0.711925
TRITD7Av1G065380	NAC domain	TraesCS7A02G194700, TraesCS7B02G100300, TraesCS7D02G196300	AT3G04060, AT5G18270	TRITD7Av1G065380	NAC	AT5G18270.2	3e-61	Arabidopsis NAC domain containing protein 87	0.00168675	0.015343	-1.66732	0.530914	22.9602	9.16496	15.4416	1.13901	5.46396	3.49978
TRITD7Bv1G230650	NB-ARC	TraesCS7B02G479900, TraesCS7A02G555200		TRITD7Bv1G230650					0.00172186	0.0156117	-1.41958	0.4529	0.313748	0.151585	0.200473	0.0218862	0.0498367	0.0818083
TRITD3Av1G012340		TraesCS3A02G050400, TraesCS3B02G059200, TraesCS3D02G049900		TRITD3Av1G012340					0.00172894	0.0156487	-0.873394	0.278752	241.395	185.721	144.156	48.6883	95.3921	102.11
TRITD7Bv1G007060	Transcription factor, MADS-box	TraesCS7B02G020800, TraesCS7A02G122000, TraesCS7D02G120500		TRITD7Bv1G007060	MIKC_MADS	AT1G24260.1	3e-76	MIKC_MADS family protein	0.00177247	0.0159148	-1.28088	0.40976	1.78415	1.38018	1.78643	0.65087	0.175229	0.675821
TRITD1Bv1G043570	Nodulin-like	TraesCS1B02G109300, TraesCS1A02G109800, TraesCS1D02G091500	AT2G28120	TRITD1Bv1G043570					0.00177169	0.0159148	-2.23058	0.713545	0.272945	0.140999	0.18662	0.047624	0	0
TRITD5Av1G061660				TRITD5Av1G061660					0.00180802	0.016154	-0.725866	0.232643	23.3928	21.4316	14.8637	7.46971	8.2759	13.6666
TRITD2Bv1G027830		TraesCS2B02G101400, TraesCS2A02G008400		TRITD2Bv1G027830					0.00181729	0.016223	-1.50986	0.484151	9.27024	7.73332	5.85971	0.772831	3.99188	1.33827
TRITD1Bv1G117170	Ribosomal protein Rsm22-like	TraesCS1B02G197800, TraesCS1A02G182900, TraesCS1D02G186400	AT1G64600	TRITD1Bv1G117170					0.00181845	0.0162241	-0.623279	0.199872	2.02816	2.13269	1.86538	1.48737	0.756678	1.10337
TRITD7Bv1G027340	Leucine-rich repeat	TraesCS7B02G069800, TraesCS7A02G164000, TraesCS7D02G166100	AT2G26330	TRITD7Bv1G027340					0.00182583	0.0162713	-0.741666	0.237928	3.47335	5.00204	6.67997	2.86744	1.76833	2.4987
TRITD2Av1G259910	DTW	TraesCS2A02G462100, TraesCS2B02G483600, TraesCS2D02G462200	AT5G54880	TRITD2Av1G259910					0.00183268	0.0163219	-0.677609	0.217455	1.30186	1.24947	1.10723	0.940589	0.479494	0.515635
TRITD6Av1G009250	Ionotropic glutamate receptor	TraesCS6A02G048700, TraesCS6B02G065400, TraesCSU02G107700	AT1G42540, AT4G35290, AT3G51480, AT2G17260	TRITD6Av1G009250					0.00183587	0.0163399	-1.41967	0.455668	0.249903	0.271193	0.216078	0.127576	0.0447995	0.0269645
TRITD6Bv1G014610	Gliadin/LMW glutenin	TraesCS6B02G065856, TraesCS6A02G049800, TraesCSU02G108100, TraesCSU02G108300, TraesCSU02G108500, TraesCSU02G108400, TraesCSU02G220600, TraesCS6A02G049700, TraesCS6A02G049200, TraesCSU02G188800, TraesCSU02G220200, TraesCSU02G239000		TRITD6Bv1G014610					0.00184047	0.0163633	-5.39784	1.73294	342.337	2.03047	364.784	0.42111	0.28517	0.160353
TRITD5Av1G013920				TRITD5Av1G013920					0.00187105	0.0166015	-2.45941	0.790813	0.539643	1.4389	0.340672	0	0	0.194398
TRITD0Uv1G125390		TraesCS6B02G013800		TRITD0Uv1G125390					0.00188226	0.0166779	-1.36315	0.438566	15.6128	17.9447	9.44572	1.58906	6.44288	3.89294
TRITD2Bv1G161940		TraesCS2B02G341600, TraesCS2D02G322400, TraesCS2A02G344100		TRITD2Bv1G161940					0.00189361	0.0167643	-0.928663	0.298948	24.0341	17.128	17.1603	4.35284	10.5811	9.4461
TRITD7Av1G006260	Pectinesterase inhibitor domain	TraesCS7A02G030000		TRITD7Av1G006260					0.00190346	0.0168336	-1.0448	0.336502	314.017	275.062	160.722	54.1203	136.369	83.2488
TRITD7Bv1G204900		TraesCS7B02G390300, TraesCS7A02G486900, TraesCS7D02G473400		TRITD7Bv1G204900					0.00192254	0.0169807	-1.05353	0.339636	100.23	80.4612	55.5621	14.7948	37.5385	33.9427
TRITD4Av1G259600		TraesCS4A02G481500, TraesCS7D02G011900, TraesCS1B02G175300		TRITD4Av1G259600					0.00193445	0.0170606	-2.07083	0.667986	0.656075	0.703384	0.497237	0.0477422	0	0.236479
TRITD3Av1G251110		TraesCS3A02G445500, TraesCS3D02G438300, TraesCS3B02G480100		TRITD3Av1G251110					0.00193819	0.0170864	-1.16845	0.376974	104.272	103.013	56.5844	15.1522	45.477	26.8894
TRITD1Bv1G191400	Matrin/U1-C-like, C2H2-type zinc finger	TraesCS1B02G362700, TraesCS1A02G348100, TraesCS1D02G351000		TRITD1Bv1G191400					0.00193944	0.0170902	-0.810445	0.261489	3.66496	2.21364	2.85522	0.815914	1.62665	1.54531
TRITD7Av1G252020	EamA domain	TraesCS7A02G477500, TraesCS7D02G465000	AT1G09380	TRITD7Av1G252020					0.00194591	0.0171255	-0.671747	0.216807	3.93937	5.74993	4.68791	2.62094	3.21177	1.69298
TRITD2Av1G034560	Short-chain dehydrogenase/reductase SDR	TraesCS2A02G121800, TraesCSU02G191000, TraesCS2D02G123900, TraesCSU02G199900, TraesCS2B02G143600		TRITD2Av1G034560					0.00196328	0.0172311	-1.99118	0.643202	0.514928	0.306399	0.316048	0.103712	0	0.0429033
TRITD7Av1G073570	Protein kinase domain	TraesCS7A02G211100, TraesCS7D02G212800, TraesCS7B02G118100	AT3G25560	TRITD7Av1G073570					0.00198885	0.0173933	-0.750926	0.242869	0.745394	1.02071	0.902318	0.371115	0.353939	0.528979
TRITD2Bv1G150180	Phytocyanin domain	TraesCS2B02G316700, TraesCS2D02G298500, TraesCS2A02G300500		TRITD2Bv1G150180					0.00199753	0.0174618	-0.971113	0.314215	5.73918	6.62514	5.07522	1.16311	3.03797	2.86417
TRITD7Av1G056590	GDP-fucose protein O-fucosyltransferase	TraesCS7A02G177400, TraesCS7B02G082500, TraesCS7D02G178800	AT1G22460	TRITD7Av1G056590					0.00200065	0.0174752	-0.66498	0.215194	1.14116	0.995864	1.58021	0.814093	0.489647	0.603928
TRITD5Bv1G123540	Ccc1 family	TraesCS5B02G202100, TraesCS5A02G203400, TraesCS5D02G209900	AT2G01770	TRITD5Bv1G123540					0.00200348	0.0174955	-0.902983	0.292254	7.29164	6.89289	5.77505	1.51047	3.56765	3.57641
TRITD4Av1G042650	PPM-type phosphatase domain	TraesCS4A02G094300, TraesCS4D02G210900, TraesCS4B02G210100		TRITD4Av1G042650					0.00202136	0.0176185	-0.674833	0.218599	1.55246	1.08356	1.12681	0.691333	0.457484	0.778362
TRITD2Bv1G129080	Protein kinase domain	TraesCS2B02G281400, TraesCS2D02G263100, TraesCS2A02G260600	AT3G02130	TRITD2Bv1G129080					0.00203453	0.0177184	-0.865709	0.280606	4.55568	2.865	3.39655	0.939966	2.22395	1.58885
TRITD2Bv1G223150	Remorin, C-terminal	TraesCS2B02G485700, TraesCS2D02G464900, TraesCS2A02G464000	AT1G30320	TRITD2Bv1G223150					0.00205483	0.0178354	-0.585661	0.190014	4.24616	4.6614	7.24061	3.25286	2.41164	3.18875
TRITD2Bv1G168000	Pentatricopeptide repeat	TraesCS2B02G355200, TraesCS2A02G326700, TraesCS2D02G336100	AT2G15630	TRITD2Bv1G168000					0.00206868	0.0179259	-0.753018	0.244471	0.948476	0.798503	0.731355	0.430405	0.306551	0.425917
TRITD7Bv1G227150		TraesCS7B02G466000, TraesCS7B02G465900, TraesCSU02G225500, TraesCS7A02G543800, TraesCS7D02G529700, TraesCSU02G246300		TRITD7Bv1G227150					0.00207375	0.0179625	-0.902082	0.292935	42.4831	29.0932	22.8782	9.77891	19.8098	9.86277
TRITD1Bv1G183200	Basic-leucine zipper domain	TraesCS1B02G343500, TraesCS1D02G332200	AT4G02640, AT3G54620	TRITD1Bv1G183200	bZIP	AT5G28770.2	4e-27	bZIP family protein	0.00208139	0.01801	-2.30475	0.748692	1.85021	0.217836	2.37224	0.0785775	0.118985	0.0688031
TRITD5Av1G253830	Leucine-rich repeat	TraesCS4D02G365500	AT2G34930	TRITD5Av1G253830					0.00210202	0.0181395	-2.55296	0.830116	0.11663	0.0628713	0.0831572	0	0	0
TRITD7Av1G261600	Aspartic peptidase A1 family	TraesCS7B02G409400, TraesCSU02G217000		TRITD7Av1G261600					0.00210343	0.0181409	-0.986347	0.32074	30.4291	32.4721	23.5025	6.30243	18.2547	10.6145
TRITD2Av1G017730	Neprosin	TraesCS2A02G076000, TraesCS2D02G074500, TraesCS2B02G091100, TraesCS2B02G090800		TRITD2Av1G017730					0.00213386	0.0183459	-0.816615	0.265917	26.6582	20.5979	15.3537	6.06477	12.6526	9.6115
TRITD3Bv1G213230	AP2/ERF domain	TraesCS3B02G412500, TraesCS3A02G379900, TraesCS1D02G272600	AT5G64750	TRITD3Bv1G213230	ERF	AT2G33710.1	6e-34	ERF family protein	0.00214225	0.0184008	-1.26396	0.411745	1.33505	0.768149	0.767788	0.181314	0.159664	0.540995
TRITD3Bv1G262890	Protein kinase domain	TraesCS3B02G544300	AT3G01090, AT3G29160	TRITD3Bv1G262890					0.00216183	0.0184991	-0.67882	0.221327	2.56845	1.84145	1.88498	0.711436	1.35655	1.20572
TRITD1Av1G141230		TraesCS1A02G219700, TraesCS1B02G233000, TraesCS1D02G221200		TRITD1Av1G141230					0.00217289	0.018559	-0.751389	0.24511	14.4954	9.26559	11.2465	3.59181	7.22686	6.17381
TRITD7Bv1G219210	FBD domain	TraesCS7B02G434900		TRITD7Bv1G219210					0.00226671	0.0191952	-2.18774	0.71662	0.204563	0.11749	0.181378	0	0	0.0493325
TRITD0Uv1G032980	Gliadin/LMW glutenin	TraesCS4A02G453800, TraesCS7D02G031700		TRITD0Uv1G032980					0.00226821	0.0192001	-4.14582	1.3581	165.914	3.11005	188.394	0.762573	1.00307	0.450525
TRITD6Bv1G013780	Pectinesterase inhibitor domain	TraesCS6B02G064100, TraesCS6D02G055000		TRITD6Bv1G013780					0.00230798	0.0194657	-1.25402	0.411501	40.8119	42.1694	20.7683	5.77405	18.1744	7.97883
TRITD3Av1G264220	Glycoside hydrolase family 17	TraesCS3A02G480200, TraesCS3B02G524700, TraesCS3D02G475000	AT3G57240, AT3G57260, AT4G16260, AT3G57270	TRITD3Av1G264220					0.00231577	0.0195076	-2.421	0.7947	1.22957	0.613817	0.544567	0	0.225371	0.0554733
TRITD3Bv1G019410		TraesCS3B02G069300, TraesCS3A02G057500, TraesCS3A02G174600, TraesCS3A02G174800, TraesCS1D02G378000, TraesCS1D02G378100		TRITD3Bv1G019410					0.00235209	0.0197538	-2.16945	0.713226	0.187324	0.432501	0.701958	0.0316067	0	0.115395
TRITD0Uv1G003600	Gliadin/LMW glutenin			TRITD0Uv1G003600					0.00239429	0.0200396	-6.61219	2.17765	422.558	0.613217	403.16	0	0	0.0967418
TRITD2Av1G288300	Mlo-related protein	TraesCS2A02G588100, TraesCS2D02G565100, TraesCS2B02G595100	AT1G26700, AT5G53760	TRITD2Av1G288300					0.00239592	0.0200452	-0.796007	0.262173	0.595529	0.973172	0.90789	0.364461	0.315001	0.396227
TRITD2Bv1G259630	Ribonuclease CAF1	TraesCS2B02G603600, TraesCS2A02G583000, TraesCS2D02G597200		TRITD2Bv1G259630					0.00242934	0.0202431	-0.677064	0.223306	1.68453	1.48747	1.20462	0.739255	0.512159	1.02269
TRITD4Bv1G194510	Transcription factor, MADS-box	TraesCS4B02G346700, TraesCS5A02G515500, TraesCS4D02G341700		TRITD4Bv1G194510	MIKC_MADS	AT2G45660.1	2e-66	AGAMOUS-like 20	0.00243097	0.0202482	-0.589107	0.194309	4.89566	4.607	5.16591	2.48293	2.82882	2.80893
TRITD3Av1G162730				TRITD3Av1G162730					0.00250859	0.0207876	-2.71616	0.898705	5.63499	3.45173	5.23823	0	1.74384	0
TRITD5Av1G164300		TraesCS5A02G277600		TRITD5Av1G164300					0.00252668	0.0209209	-0.736381	0.243825	25.9843	32.3566	15.8179	9.34411	11.1052	14.0558
TRITD1Av1G148190	Zinc finger, RING-type	TraesCS1A02G231700, TraesCS1D02G230600, TraesCS1B02G242800	AT1G53820	TRITD1Av1G148190					0.00256577	0.0211941	-1.54417	0.512084	0.904875	1.39588	0.959638	0.158064	0.119141	0.456335
TRITD5Bv1G142620		TraesCS5B02G248900, TraesCS5D02G258600, TraesCS5A02G250900		TRITD5Bv1G142620					0.002582	0.0212946	-1.38909	0.460945	2.42429	2.36978	1.57176	0.677721	0.555288	0.303825
TRITD4Av1G000100	SANT/Myb domain	TraesCS4A02G006100, TraesCS4B02G299000, TraesCS4D02G297900		TRITD4Av1G000100	MYB	AT2G23290.1	2e-50	myb domain protein 70	0.00263743	0.0216402	-0.843334	0.280446	10.2026	5.45867	8.82714	2.23468	3.97577	4.43162
TRITD7Bv1G219220	F-box domain	TraesCS7B02G434800, TraesCSU02G226200, TraesCS7D02G508900		TRITD7Bv1G219220					0.00264588	0.0216797	-1.43702	0.478028	0.506051	0.306457	0.38056	0.0984669	0.128484	0.0468688
TRITD7Bv1G161770	Germin	TraesCS7B02G289600, TraesCS7D02G383300, TraesCS7A02G386800		TRITD7Bv1G161770					0.00264761	0.0216843	-1.19941	0.399012	6.12425	5.68055	3.09856	2.32093	0.727493	1.67199
TRITD3Av1G192190	Proton-dependent oligopeptide transporter family	TraesCS3A02G304400, TraesCS3D02G297600, TraesCS3B02G332100		TRITD3Av1G192190					0.00273777	0.0222199	-1.45764	0.486571	0.340277	0.315881	0.412211	0.1113	0.145419	0.0230835
TRITD2Bv1G249160	Oxoglutarate/iron-dependent dioxygenase	TraesCS2B02G570900, TraesCS2A02G540400, TraesCS2D02G542100		TRITD2Bv1G249160					0.00273667	0.0222199	-3.40576	1.13682	3.95643	0.131968	2.55059	0	0.0607756	0.0332548
TRITD2Bv1G243130		TraesCS2B02G551700, TraesCS2D02G523800		TRITD2Bv1G243130					0.00275163	0.0222965	-2.20856	0.737612	14.9538	2.81482	13.6039	0.924423	0.295407	2.1004
TRITD1Av1G019530	Bifunctional inhibitor/plant lipid transfer protein/seed storage helical domain	TraesCS1B02G081000, TraesCS1B02G081200, TraesCS1B02G080900, TraesCS1B02G081300		TRITD1Av1G019530					0.00277338	0.0224186	-0.667784	0.223205	526.417	498.601	345.438	166.919	306.192	243.949
TRITD2Bv1G150910	Cellulose synthase	TraesCS2B02G318100, TraesCS2A02G302300, TraesCS2D02G301000	AT2G32620, AT4G15320, AT2G32610, AT4G15290, AT2G32530, AT2G32540	TRITD2Bv1G150910					0.00277369	0.0224186	-0.723732	0.241908	0.56855	0.430044	0.379694	0.164048	0.242247	0.258156
TRITD6Bv1G164770	Proton-dependent oligopeptide transporter family	TraesCS6B02G309200, TraesCS6D02G260500, TraesCS6A02G280200	AT5G19640	TRITD6Bv1G164770					0.00278894	0.0224939	-2.24927	0.75224	0.543846	0.133772	0.3415	0.0642717	0	0.0400061
TRITD5Av1G006580	ABC transporter-like	TraesCS5A02G016200	AT2G36380, AT1G66950	TRITD5Av1G006580					0.00279965	0.0225497	-0.597711	0.199976	0.949375	0.877326	1.34302	0.569506	0.639823	0.510458
TRITD6Bv1G175140	LNK family	TraesCS6B02G330000, TraesCS6A02G300300, TraesCS6D02G280200		TRITD6Bv1G175140					0.00282364	0.0227166	-0.784403	0.262666	4.00953	4.31784	5.03829	1.72883	1.44584	3.33757
TRITD6Av1G207420	Dehydrin	TraesCS6A02G350300, TraesCS6D02G332700		TRITD6Av1G207420					0.00295009	0.0235161	-0.889798	0.299304	2.18922	1.76662	1.83447	0.60176	0.815217	0.98637
TRITD3Bv1G018800	Pectinesterase inhibitor domain	TraesCS3B02G068600		TRITD3Bv1G018800					0.00297827	0.0236864	-0.940909	0.316807	224.25	198.475	114.372	48.0515	107.188	59.7452
TRITD5Bv1G248140	Leucine-rich repeat domain superfamily	TraesCS5B02G544100	AT1G09760	TRITD5Bv1G248140					0.0029833	0.0237129	-0.616797	0.207714	1.33231	1.26621	2.20778	0.773885	0.717015	1.04515
TRITD7Av1G188360	Polyketide cyclase/dehydrase	TraesCS7A02G350800, TraesCS7D02G328000, TraesCS7B02G232100	AT4G27920, AT5G53160, AT1G01360, AT4G01026	TRITD7Av1G188360					0.00302248	0.0239239	-0.775836	0.261626	11.0118	6.55007	10.4096	2.76491	5.33568	4.9849
TRITD7Av1G037810	F-box domain	TraesCS7A02G127700, TraesCS7D02G126300, TraesCS7B02G027600	AT5G67140	TRITD7Av1G037810					0.00304133	0.0240321	-0.872372	0.294369	3.56068	3.79237	4.27016	1.40096	1.23632	2.39925
TRITD1Bv1G158410	Transferase	TraesCS1B02G287800, TraesCS1D02G278100, TraesCS1A02G278800	AT2G39980, AT5G01210	TRITD1Bv1G158410					0.00304353	0.0240358	-0.827747	0.279332	0.589126	0.612023	0.662247	0.230096	0.456007	0.179943
TRITD6Av1G164840	SPX domain	TraesCS6A02G257300, TraesCS6B02G267800, TraesCS6D02G238500	AT1G63010, AT4G22990, AT4G11810	TRITD6Av1G164840					0.00309802	0.0243692	-0.719435	0.24323	0.903987	1.0222	1.79854	0.638393	0.449445	0.665645
TRITD4Bv1G159220	Myo-inositol-1-phosphate synthase	TraesCS4B02G267200, TraesCS4A02G038500, TraesCS4D02G266700	AT2G22240, AT5G10170, AT4G39800	TRITD4Bv1G159220					0.00313121	0.0245608	-0.99744	0.337594	78.4878	113.166	113.476	32.4163	23.4517	67.5551
TRITD4Bv1G116370	Endosulphine	TraesCS4B02G185500, TraesCS4A02G119000		TRITD4Bv1G116370					0.00314211	0.0246369	-0.593933	0.201096	11.1324	6.5126	6.4244	3.55071	4.55493	4.85946
TRITD1Av1G002200	Gliadin/LMW glutenin	TraesCS1D02G001200, TraesCS1B02G010600		TRITD1Av1G002200					0.00317202	0.0248133	-5.5672	1.88683	375.571	1.5729	386.051	0.207651	0.0823365	0.537388
TRITD6Bv1G020780	Gliadin/LMW glutenin	TraesCS6B02G086500, TraesCS6A02G049800, TraesCSU02G108100, TraesCSU02G108300, TraesCSU02G108500, TraesCSU02G108400, TraesCSU02G220600, TraesCS6A02G049700, TraesCS6A02G049200, TraesCSU02G188800, TraesCSU02G220200, TraesCSU02G239000		TRITD6Bv1G020780					0.00321987	0.0251086	-3.49938	1.18787	320.482	9.06454	322.289	2.58473	3.41888	2.91704
TRITD3Bv1G145920	Protein kinase domain	TraesCS3B02G279800, TraesCS3A02G250300, TraesCS3D02G250700		TRITD3Bv1G145920					0.00322557	0.0251354	-1.17549	0.399097	0.506212	0.203848	0.506887	0.130322	0.164767	0.0618216
TRITD2Bv1G182210	FBD domain			TRITD2Bv1G182210					0.00324154	0.0252316	-0.774801	0.263193	0.958755	0.725227	1.05927	0.633696	0.345491	0.315073
TRITD3Bv1G193870	EamA domain	TraesCS3B02G371400, TraesCS3A02G339800, TraesCS3D02G333300		TRITD3Bv1G193870					0.00326077	0.0253623	-1.08418	0.368515	3.85529	4.20801	5.75583	1.16746	1.00066	3.06757
TRITD3Bv1G278850	Double-stranded RNA-binding domain	TraesCS3A02G527500	AT3G62800	TRITD3Bv1G278850					0.00333211	0.0257445	-1.00988	0.344046	2.05778	1.70522	2.41239	0.521898	1.44103	0.501801
TRITD1Av1G200150		TraesCS1B02G360900, TraesCS1D02G349800	AT1G07250, AT2G29710, AT3G21780, AT3G21760, AT4G15280, AT3G21800, AT1G07240, AT2G29730, AT4G15260, AT2G29740, AT2G29750, AT4G15270, AT3G21750, AT3G21790, AT1G07260	TRITD1Av1G200150					0.00334281	0.0258127	-1.31238	0.447251	0.651342	0.427403	0.407465	0.144407	0.0483306	0.209566
TRITD2Bv1G189460	Caleosin-related	TraesCS2B02G402500, TraesCS2A02G385600, TraesCS2D02G382300	AT2G33380, AT5G55240, AT5G29560, AT4G26740	TRITD2Bv1G189460					0.00339578	0.0261684	-3.01577	1.02947	2.69011	0.268096	2.5298	0.0340265	0	0.211159
TRITD6Av1G055780	B-box-type zinc finger	TraesCS6A02G150900, TraesCS6D02G140900		TRITD6Av1G055780	CO-like	AT5G57660.1	6e-65	CONSTANS-like 5	0.00339941	0.026178	-1.06833	0.364728	0.801344	0.878658	0.68509	0.314993	0.123841	0.442598
TRITD1Av1G002310				TRITD1Av1G002310					0.0034123	0.0262472	-2.35638	0.804793	36.0596	3.41536	36.1456	2.37063	1.27839	1.16556
TRITD7Av1G231610		TraesCS7A02G429300, TraesCS7B02G329400, TraesCS7D02G421400		TRITD7Av1G231610					0.00341753	0.0262736	-0.988579	0.337693	1.14507	1.11004	1.63317	0.722208	0.391238	0.342908
TRITD1Bv1G015000		TraesCS1B02G058800, TraesCS1A02G045500, TraesCS1D02G046200		TRITD1Bv1G015000					0.00342189	0.0262967	-0.908428	0.310356	40.3476	22.1782	23.0794	6.64254	13.3541	14.8862
TRITD5Bv1G019770	Germin	TraesCS5B02G048500, TraesCS5A02G044300, TraesCS5D02G054300		TRITD5Bv1G019770					0.00342848	0.026328	-1.09986	0.375835	1.71375	1.95911	1.02791	0.241377	0.686953	0.676634
TRITD7Av1G192980	NAC domain	TraesCS7A02G357500, TraesCS7B02G270300, TraesCS7D02G365200	AT5G56620, AT4G29230	TRITD7Av1G192980	NAC	AT4G29230.1	1e-113	NAC domain containing protein 75	0.00350133	0.0267688	-0.638704	0.218741	1.31792	0.902037	0.993747	0.461501	0.584695	0.627792
TRITD7Av1G144880		TraesCSU02G196400, TraesCSU02G191200, TraesCS3A02G017500		TRITD7Av1G144880					0.00352724	0.0269277	-2.33841	0.801481	1.73082	0.64554	2.09584	0.205025	0	0.277886
TRITD3Av1G032990	Zinc finger, CCCH-type	TraesCS3A02G107200, TraesCS3D02G109300, TraesCS3B02G125600		TRITD3Av1G032990	C3H	AT2G19810.1	1e-97	C3H family protein	0.00357158	0.0271865	-1.68974	0.579926	6.81662	9.4412	8.75817	0.743809	0.990458	4.73742
TRITD3Bv1G273770		TraesCS3B02G578900, TraesCS3A02G510800		TRITD3Bv1G273770					0.00366542	0.0277287	-1.20576	0.414977	30.3351	31.4565	17.3524	3.82499	13.7742	8.17428
TRITD3Bv1G071680	DNA-binding pseudobarrel domain superfamily	TraesCS3B02G183100, TraesCS3A02G156400, TraesCS3D02G164300		TRITD3Bv1G071680					0.00378518	0.0283875	-0.587646	0.202949	3.31488	2.31914	2.85884	1.09039	1.86957	1.86144
TRITD4Bv1G199040	Lateral organ boundaries, LOB	TraesCS4B02G361100, TraesCS4D02G354100, TraesCS5A02G529300	AT1G68510	TRITD4Bv1G199040	LBD	AT3G02550.1	5e-59	LOB domain-containing protein 41	0.00378471	0.0283875	-0.61175	0.211271	5.82188	4.04928	4.33113	1.76922	3.21254	2.88174
TRITD5Bv1G043640	SANT/Myb domain	TraesCS5B02G093000, TraesCS5D02G099100, TraesCS5A02G087100	AT3G06490, AT5G49620	TRITD5Bv1G043640	MYB	AT1G48000.1	5e-79	myb domain protein 112	0.00383973	0.0287449	-1.11493	0.38565	8.32484	6.32082	4.86571	1.39259	1.52667	4.21806
TRITD2Bv1G042060		TraesCS2B02G138100, TraesCS2A02G118100, TraesCS2D02G116900	AT5G07500	TRITD2Bv1G042060					0.00389864	0.0290919	-1.67991	0.58204	4.65406	1.37388	3.82282	0.205779	1.0437	0.637525
TRITD3Bv1G216900	Ubiquitin-like domain	TraesCS3A02G390500, TraesCS3D02G382800, TraesCS3D02G383000, TraesCS3A02G390400		TRITD3Bv1G216900					0.00390754	0.0291328	-0.692815	0.2401	4.08633	2.26717	3.18509	1.35172	1.52009	1.75768
TRITD1Bv1G225310				TRITD1Bv1G225310					0.0039258	0.0292138	-0.832143	0.288531	321.727	312.029	208.296	73.4779	150.153	159.019
TRITD0Uv1G136080		TraesCS2B02G349800, TraesCS2B02G349700, TraesCS2D02G330400		TRITD0Uv1G136080					0.00395299	0.0293608	-1.19733	0.415468	1.61209	2.32778	0.973486	0.448651	0.381758	0.454422
TRITD2Bv1G165040		TraesCS2B02G349800, TraesCS2D02G330400		TRITD2Bv1G165040					0.00395299	0.0293608	-1.19733	0.415468	1.61209	2.32778	0.973486	0.448651	0.381758	0.454422
TRITD0Uv1G089020	CDC50/LEM3 family			TRITD0Uv1G089020					0.00398667	0.0295583	-0.739935	0.256992	1.65178	1.78245	1.54389	1.09625	0.48673	0.886401
TRITD4Av1G228770	Small GTPase	TraesCS4A02G407500, TraesCS4B02G306900, TraesCS4D02G305100	AT5G64990, AT2G22290, AT5G10260, AT4G39890	TRITD4Av1G228770					0.0040823	0.0300954	-0.842628	0.293422	11.8578	9.95795	7.2537	2.45178	5.54507	5.04623
TRITD1Av1G185240	Leucine-rich repeat-containing N-terminal, plant-type	TraesCS1B02G319600, TraesCS1D02G308500		TRITD1Av1G185240					0.00408292	0.0300954	-1.02617	0.35734	12.2212	8.51064	8.25363	1.89384	6.14449	3.36215
TRITD4Bv1G149530	SecY/SEC61-alpha family	TraesCS4B02G248500, TraesCS4A02G056500, TraesCS4D02G247900	AT1G78720, AT1G29310, AT2G34250	TRITD4Bv1G149530					0.0040948	0.0301616	-0.640513	0.223116	20.316	9.89169	17.9705	7.84479	8.85135	7.72159
TRITD0Uv1G003650	Gliadin/LMW glutenin			TRITD0Uv1G003650					0.00410385	0.0302073	-4.27153	1.4883	617.293	7.63034	659.894	3.03684	1.97948	1.39109
TRITD6Bv1G138550	SANT/Myb domain	TraesCS6B02G265200, TraesCS6A02G236700, TraesCS6D02G219300		TRITD6Bv1G138550	MYB	AT5G52260.1	4e-58	myb domain protein 19	0.00410676	0.030223	-1.02293	0.356442	5.28187	3.66413	2.2437	1.34828	0.766476	1.88816
TRITD7Bv1G206150		TraesCS7B02G393800, TraesCS7A02G490500, TraesCS7D02G476900	AT5G57200, AT4G25940	TRITD7Bv1G206150					0.004153	0.0304604	-0.813446	0.283797	2.80115	5.79237	5.2471	1.70816	1.59465	2.73239
TRITD6Bv1G058960	GDSL lipase/esterase	TraesCS6B02G165800, TraesCS6D02G126600, TraesCS6A02G137500		TRITD6Bv1G058960					0.00421749	0.0307988	-2.41753	0.844872	0.336331	0.289438	0.522483	0	0	0.165763
TRITD3Bv1G216370	Amino acid transporter, transmembrane domain	TraesCS3B02G420700, TraesCS3D02G381500, TraesCS3A02G388000		TRITD3Bv1G216370					0.00423713	0.0309097	-0.681798	0.238395	5.83747	5.84955	4.65264	1.80684	3.96777	2.89216
TRITD5Bv1G186870	BTB/POZ domain	TraesCS5B02G361600, TraesCS5A02G359300, TraesCS5D02G368400	AT2G46260, AT4G01160, AT3G61600	TRITD5Bv1G186870					0.00427929	0.03112	-1.30452	0.456635	0.70366	0.314995	0.449003	0.147336	0.0557902	0.183162
TRITD7Av1G179450	Ribonuclease III domain	TraesCS7A02G336500, TraesCS7D02G344200, TraesCS7B02G248100	AT4G15417	TRITD7Av1G179450					0.00431133	0.0312813	-0.764657	0.267884	18.4102	9.87047	9.04203	4.66282	4.84983	7.4091
TRITD1Av1G161470	PEP-utilising enzyme, C-terminal	TraesCS1A02G253200, TraesCS1D02G252900, TraesCS1B02G264900	AT4G15530	TRITD1Av1G161470					0.00431222	0.0312824	-0.693948	0.243118	47.6678	31.97	40.6838	12.9025	23.9777	25.3733
TRITD6Av1G170910	Glutamine-Leucine-Glutamine, QLQ	TraesCS6A02G269600, TraesCS6B02G296900, TraesCS6D02G245300		TRITD6Av1G170910	GRF	AT3G13960.1	2e-45	growth-regulating factor 5	0.00433127	0.0313741	-0.644963	0.226067	3.20953	4.02951	3.76247	1.25483	2.62447	2.11808
TRITD4Av1G256280	Pectinesterase inhibitor domain	TraesCS4A02G461400, TraesCS5D02G561900		TRITD4Av1G256280					0.00434182	0.0314113	-1.21995	0.427724	48.6881	49.4319	31.2203	6.60741	26.2357	11.2796
TRITD5Bv1G020260	Knottin, scorpion toxin-like superfamily	TraesCS5B02G050300, TraesCS5D02G056100, TraesCS5D02G056200		TRITD5Bv1G020260					0.00435109	0.0314331	-4.50137	1.57859	179.236	1.94587	168.565	0.754849	0.556582	0
TRITD1Bv1G200630	Pectinesterase inhibitor domain	TraesCS1B02G384400, TraesCS1A02G366600, TraesCS7D02G517600, TraesCS1A02G338800		TRITD1Bv1G200630					0.00438705	0.03166	-0.958729	0.336526	216.748	204.626	132.421	40.6752	113.779	72.7408
TRITD6Bv1G008330	Plant peroxidase	TraesCS6B02G042600, TraesCS6A02G029800, TraesCS6D02G034200	AT5G67400, AT4G37520, AT4G37530, AT3G49960	TRITD6Bv1G008330					0.00441263	0.0317959	-1.05526	0.370651	1.34111	0.404069	0.88182	0.283894	0.271922	0.235012
TRITD7Bv1G046230	Uncharacterized protein At3g17950-like	TraesCS7B02G111600, TraesCS7A02G204400, TraesCS7D02G207500		TRITD7Bv1G046230					0.00442263	0.0318396	-0.66127	0.232324	2.2125	2.73087	2.4391	1.15931	1.28444	1.33542
TRITD6Av1G188670	Myc-type, basic helix-loop-helix (bHLH) domain	TraesCS6A02G306200, TraesCS6B02G334600, TraesCS6D02G285300		TRITD6Av1G188670	bHLH	AT1G26945.1	2e-28	bHLH family protein	0.00446625	0.032065	-0.965703	0.339653	13.6848	21.552	19.9222	5.08511	4.97207	12.6118
TRITD5Av1G190940	RWP-RK domain	TraesCS5A02G349500, TraesCS5D02G355900, TraesCS5B02G350900	AT2G17150, AT4G35270, AT1G76350, AT4G38340, AT1G20640	TRITD5Av1G190940	Nin-like	AT2G17150.1	0	Nin-like family protein	0.00449714	0.0322147	-0.673156	0.236943	0.605499	0.539006	0.6837	0.286453	0.299317	0.339232
TRITD7Bv1G232800	NB-ARC	TraesCS6D02G387400, TraesCS6D02G387500, TraesCS6B02G447900	AT1G58602, AT1G50180, AT5G48620, AT1G59780, AT5G35450, AT5G43470, AT1G10920, AT1G59620, AT1G59218, AT1G58410, AT1G58848, AT1G58390, AT1G58400, AT1G53350	TRITD7Bv1G232800					0.00454075	0.032449	-1.11812	0.393991	0.466524	0.610131	0.809879	0.31538	0.120188	0.19291
TRITD3Av1G032230	BTB/POZ domain	TraesCS3A02G105400, TraesCS3D02G107500, TraesCS3B02G123800	AT1G64280	TRITD3Av1G032230					0.00454252	0.0324561	-0.675978	0.238205	1.19806	1.01571	1.42241	0.640053	0.404036	0.866562
TRITD7Bv1G012800	VRR-NUC domain	TraesCS7B02G033200, TraesCS7D02G132100, TraesCS7A02G132600	AT1G48360	TRITD7Bv1G012800					0.00457068	0.0325903	-0.612032	0.215821	0.617525	0.974485	0.891928	0.509125	0.512322	0.326512
TRITD5Av1G241730	Neprosin	TraesCS5A02G504100, TraesCS4B02G333500		TRITD5Av1G241730					0.00458376	0.0326557	-0.927762	0.327262	61.3574	58.3041	36.3367	13.0412	34.2226	18.2795
TRITD2Av1G198250		TraesCS2A02G344100, TraesCS2B02G341600, TraesCS2D02G322400		TRITD2Av1G198250					0.00461248	0.032791	-0.99999	0.352989	16.7755	5.84526	8.48983	2.38704	4.48895	3.77844
TRITD2Bv1G168470	NAC domain	TraesCS2B02G355600, TraesCS2D02G336500, TraesCS2A02G326400, TraesCS2A02G326300	AT3G01600, AT5G14490	TRITD2Bv1G168470	NAC	AT1G25580.1	2e-71	NAC family protein	0.0046686	0.0330961	-0.894893	0.316323	0.48325	0.909772	1.03227	0.263522	0.418974	0.262002
TRITD1Bv1G202880	AP2/ERF domain	TraesCS1B02G392200, TraesCS1D02G378800, TraesCS1A02G372200, TraesCS1D02G378400	AT3G25730	TRITD1Bv1G202880	RAV	AT1G68840.2	1e-119	related to ABI3/VP1 2	0.00471303	0.033343	-1.51646	0.536608	3.24689	0.669903	0.779184	0.207268	0.198678	0.385452
TRITD2Bv1G034660	NAC domain	TraesCS2B02G118300, TraesCS2B02G118400, TraesCS2A02G101100	AT3G04060, AT5G18270	TRITD2Bv1G034660	NAC	AT5G61430.1	2e-84	NAC domain containing protein 100	0.00474149	0.0335113	-0.593843	0.210278	4.14143	3.22708	2.38346	1.3938	2.25877	1.71069
TRITD4Av1G256340		TraesCS7D02G082200		TRITD4Av1G256340					0.00474586	0.0335241	-1.2312	0.436009	2.41197	3.94215	3.07467	0.561657	1.25584	0.858736
TRITD6Av1G214120	Aspartic peptidase domain superfamily	TraesCS6A02G370800, TraesCS6D02G354600, TraesCS6B02G407800, TraesCS6B02G407700, TraesCSU02G217000		TRITD6Av1G214120					0.00476171	0.0336019	-1.0568	0.37439	3.67639	4.44579	2.30338	0.615913	1.78633	1.42653
TRITD3Bv1G046390	PAZ domain	TraesCS3B02G135800, TraesCS3D02G118600, TraesCS3A02G116800		TRITD3Bv1G046390					0.00480556	0.0338541	-0.853521	0.30269	0.495247	0.507279	0.508773	0.121456	0.218876	0.357762
TRITD6Av1G184020	Zf-FLZ domain	TraesCS6A02G295900, TraesCS6B02G325800		TRITD6Av1G184020					0.00481534	0.0339053	-1.06651	0.378311	27.8818	30.0981	25.502	5.55609	19.7253	8.01622
TRITD4Av1G177780	Zinc finger, RING-type	TraesCS4A02G237400, TraesCS4D02G076100, TraesCS4B02G077700		TRITD4Av1G177780					0.00483134	0.033984	-1.01917	0.361656	1.18615	0.634257	1.19381	0.199128	0.541488	0.345671
TRITD2Av1G269390	Small auxin-up RNA	TraesCS2A02G494500, TraesCS2B02G522600, TraesCS2B02G522500, TraesCS2D02G494600, TraesCS2D02G494800	AT1G19840, AT1G75590, AT5G10990, AT4G34750	TRITD2Av1G269390					0.00483967	0.0340311	-1.96202	0.696366	0.695775	1.18411	2.35998	0.202898	0	0.373805
TRITD2Bv1G261750	Cystatin domain	TraesCS2B02G611200, TraesCS2D02G586900, TraesCS2A02G576200		TRITD2Bv1G261750					0.0048519	0.0340826	-0.627616	0.222819	381.711	360.779	261.073	122.465	208.549	218.38
TRITD5Bv1G194900	G-protein gamma-like domain	TraesCS5B02G381400, TraesCS5D02G387800, TraesCS5A02G377800	AT4G18840	TRITD5Bv1G194900					0.00498893	0.0347853	-0.849493	0.302553	1.75577	1.49222	1.4488	0.741738	0.411311	0.960036
TRITD1Av1G206640	MaoC-like dehydratase domain	TraesCS1B02G359500, TraesCS1D02G348500	AT5G60335	TRITD1Av1G206640					0.00508975	0.0352896	-0.730394	0.260734	2.13152	3.06549	2.42052	1.18301	0.965591	1.49716
TRITD7Bv1G039030	NAC domain	TraesCS7B02G094000, TraesCS7D02G189900, TraesCS7A02G189200	AT3G04060, AT5G18270	TRITD7Bv1G039030	NAC	AT5G18270.1	4e-70	Arabidopsis NAC domain containing protein 87	0.00510455	0.0353629	-1.26429	0.451474	12.5729	3.95121	9.17235	1.22369	3.38047	2.46628
TRITD3Bv1G222350	Short-chain dehydrogenase/reductase SDR	TraesCS3B02G434900, TraesCS3D02G396900, TraesCS3A02G402000	AT2G29300, AT2G29310, AT2G29330, AT2G29340, AT1G07440, AT1G07450, AT2G30670, AT2G29320	TRITD3Bv1G222350					0.00521256	0.0359559	-1.15439	0.413228	4.34082	1.09635	1.71858	0.787285	0.586868	0.500808
TRITD6Av1G174960	Knottin, scorpion toxin-like superfamily	TraesCS6A02G277900, TraesCS6D02G258500, TraesCS6B02G306200		TRITD6Av1G174960					0.00527108	0.0362636	-0.993372	0.356049	26.6337	17.432	17.1582	4.76718	14.0572	5.8394
TRITD7Bv1G056970	Phosphofructokinase domain	TraesCS7B02G193600, TraesCS7A02G226000, TraesCS7D02G228500	AT1G76550, AT1G20950	TRITD7Bv1G056970					0.00530989	0.0364509	-0.662594	0.237693	1.49325	1.65022	1.43196	0.516377	1.18214	0.787891
TRITD1Bv1G006200	Proteinase inhibitor I13, potato inhibitor I	TraesCS1B02G034200, TraesCS1D02G027500, TraesCS1D02G028000, TraesCS1D02G027700		TRITD1Bv1G006200					0.00536881	0.036754	-3.00184	1.07824	68.7709	10.0577	9.19373	1.25913	0	3.0857
TRITD1Bv1G205100	Knottin, scorpion toxin-like superfamily	TraesCS1B02G399800, TraesCS1D02G385700		TRITD1Bv1G205100					0.00541253	0.036992	-1.36841	0.491986	6.2539	6.48953	6.56566	1.54898	0.570862	3.78813
TRITD5Bv1G218110	Bromo adjacent homology (BAH) domain	TraesCS5B02G447800, TraesCS5D02G450700, TraesCS5A02G443200	AT4G14140, AT5G49160, AT4G13610, AT4G08990	TRITD5Bv1G218110					0.00546372	0.037257	-2.04864	0.737363	0.142756	0.0762982	0.124265	0.0251665	0.0283257	0
TRITD4Av1G035140	Transcription initiation factor IIF, alpha subunit	TraesCS4A02G081500, TraesCS4D02G222800, TraesCS4B02G222300		TRITD4Av1G035140					0.00547197	0.0372949	-0.589321	0.21215	0.937463	0.955261	1.13032	0.656089	0.564072	0.462969
TRITD1Bv1G021930	PWWP domain	TraesCS1B02G077900, TraesCS1D02G060900, TraesCS1A02G059700		TRITD1Bv1G021930					0.00556236	0.037718	-2.02347	0.729831	0.44611	0.183898	0.199061	0	0.0384828	0.0842273
TRITD5Bv1G193180	Homeobox domain	TraesCS5B02G378000, TraesCS5D02G385300, TraesCS5A02G375800		TRITD5Bv1G193180	HD-ZIP	AT1G30490.1	0	HD-ZIP family protein	0.00556752	0.0377303	-0.582828	0.210239	2.00093	2.725	2.40475	1.66371	1.52984	0.903318
TRITD4Av1G250090	Alpha/Beta hydrolase fold	TraesCS4A02G437800		TRITD4Av1G250090					0.00564381	0.0380679	-2.21837	0.801495	0.872568	0.568324	0.404219	0.12385	0	0.131314
TRITD0Uv1G099070	BES1/BZR1 plant transcription factor, N-terminal	TraesCS6B02G368700, TraesCS6A02G338000, TraesCS6D02G318800	AT1G78700	TRITD0Uv1G099070	BES1	AT1G78700.1	8e-70	BES1/BZR1 homolog 4	0.00566788	0.0381825	-1.66553	0.602058	0.216689	0.202831	0.255612	0	0.0317578	0.109935
TRITD6Bv1G197570	BES1/BZR1 plant transcription factor, N-terminal	TraesCS6B02G368700, TraesCS6A02G338000, TraesCS6D02G318800	AT1G78700	TRITD6Bv1G197570	BES1	AT1G78700.1	8e-70	BES1/BZR1 homolog 4	0.00566788	0.0381825	-1.66553	0.602058	0.216689	0.202831	0.255612	0	0.0317578	0.109935
TRITD7Av1G267190	FBD domain	TraesCSU02G226200, TraesCS7B02G434800, TraesCS7D02G508900		TRITD7Av1G267190					0.00577906	0.0387296	-1.58894	0.57569	1.80657	0.342469	1.27562	0.332515	0.127652	0.139696
TRITD5Bv1G149480	Neprosin	TraesCS5B02G266800, TraesCS5D02G275100		TRITD5Bv1G149480					0.00587265	0.0391664	-1.04665	0.379936	2.49472	1.81977	1.37709	0.494819	1.27226	0.409499
TRITD4Av1G017760	Neprosin	TraesCS4A02G049000, TraesCS4B02G255800, TraesCS4D02G255900		TRITD4Av1G017760					0.00588443	0.0392214	-0.734015	0.266512	10.1026	11.1381	5.89934	3.30678	5.96277	3.74855
TRITD3Bv1G185310	F-box domain	TraesCS3B02G360100, TraesCS3D02G323400		TRITD3Bv1G185310					0.00592579	0.0393963	-2.1726	0.789503	0.223986	0.192374	0.356796	0.039105	0	0
TRITD2Av1G084320	Phytocyanin domain	TraesCS2A02G215700, TraesCS2B02G240700, TraesCS2D02G221300		TRITD2Av1G084320					0.00596962	0.039593	-1.99348	0.725049	0.517197	0.387605	0.367165	0.169421	0	0
TRITD5Av1G106340	Palmitoyltransferase, DHHC domain	TraesCS5A02G139300, TraesCS5D02G153000, TraesCS5B02G136900	AT3G56920, AT5G05070, AT2G40990	TRITD5Av1G106340					0.00601139	0.0398193	-0.63832	0.232356	1.31751	0.93883	0.67398	0.403045	0.542107	0.55303
TRITD1Av1G027190	GDSL lipase/esterase	TraesCS1A02G077000, TraesCS1B02G095100, TraesCS1D02G079200	AT1G56670, AT3G62280, AT1G09390	TRITD1Av1G027190					0.00609749	0.0402236	-1.6852	0.614478	0.308609	0.398356	0.281251	0.0538533	0.0611525	0.033461
TRITD6Av1G183980	Zf-FLZ domain	TraesCS6D02G276300		TRITD6Av1G183980					0.00610336	0.0402402	-0.855055	0.311816	21.1481	22.0361	15.611	5.27828	14.3268	7.4517
TRITD7Av1G059930	NADP-dependent oxidoreductase domain	TraesCS7A02G185000, TraesCS7D02G186400, TraesCS7B02G090000, TraesCS7B02G089600		TRITD7Av1G059930					0.00611179	0.0402797	-1.03927	0.379058	0.630838	0.613399	0.683923	0.116017	0.394331	0.219718
TRITD4Av1G214000	Nucleotide-diphospho-sugar transferase	TraesCS4A02G339800, TraesCS5D02G536400, TraesCS5B02G549400	AT5G40900	TRITD4Av1G214000					0.00611289	0.0402806	-0.585894	0.2137	4.20363	3.47789	2.49144	1.3718	2.2526	2.0426
TRITD6Bv1G119750	Copper amine oxidase	TraesCS6B02G236300, TraesCS6A02G207600, TraesCS6D02G191300	AT2G42490	TRITD6Bv1G119750					0.00613004	0.0403808	-0.595439	0.217254	0.590683	0.549643	0.806632	0.354195	0.298765	0.408352
TRITD2Av1G211330	Chitin-binding, type 1	TraesCS2A02G350600, TraesCS2D02G348700, TraesCS2B02G368800, TraesCS2B02G368900		TRITD2Av1G211330					0.0061493	0.0404757	-1.88079	0.686491	1.88841	1.00361	4.21661	0	0.692755	0.253531
TRITD5Bv1G199820	Universal stress protein A family	TraesCS5B02G394600, TraesCS5A02G389400, TraesCS5D02G399400	AT3G58450, AT3G11930	TRITD5Bv1G199820					0.00619551	0.0406771	-1.15836	0.423183	1.51553	1.05527	1.34432	0.281191	0.895423	0.215339
TRITD5Bv1G006180	Thaumatin family	TraesCS5B02G015800, TraesCS5A02G018400		TRITD5Bv1G006180					0.00620944	0.0407365	-0.78437	0.286632	298.255	265.903	233.222	69.8507	159.257	160.908
TRITD4Bv1G136510	Chlorophyll A-B binding protein	TraesCS4B02G224800, TraesCS4D02G225400, TraesCS4A02G067500		TRITD4Bv1G136510					0.00626852	0.0410466	-0.928042	0.33952	1.48677	1.89738	1.30909	0.530901	0.549562	0.717533
TRITD7Bv1G077140	SBP domain	TraesCS7B02G158500, TraesCS7A02G260500, TraesCS7D02G261500		TRITD7Bv1G077140	SBP	AT5G50670.1	1e-50	SBP family protein	0.00635216	0.0414296	-0.836896	0.306665	0.605881	0.721435	0.695256	0.322294	0.325533	0.220327
TRITD1Bv1G145220		TraesCS1B02G258600, TraesCS1D02G247500, TraesCS1A02G248100	AT3G06150, AT5G19060	TRITD1Bv1G145220					0.00637766	0.0415784	-0.808443	0.296382	0.512664	0.396533	0.68979	0.197351	0.227294	0.263046
TRITD1Av1G148480	Late embryogenesis abundant protein, LEA_2 subgroup	TraesCS1A02G232200, TraesCS1D02G233500, TraesCS1B02G245500	AT4G01410	TRITD1Av1G148480					0.00644103	0.0419129	-0.600069	0.220254	15.3566	12.9519	11.4091	5.50907	10.8186	6.37001
TRITD5Av1G007170	Thaumatin family	TraesCS5A02G018200		TRITD5Av1G007170					0.00654411	0.0423984	-0.90495	0.332801	1.19373	0.939169	1.18795	0.347408	0.393393	0.59195
TRITD6Av1G008940	Glycoside hydrolase family 17	TraesCS6A02G048200, TraesCS6B02G064700, TraesCSU02G107200		TRITD6Av1G008940					0.00660494	0.0427261	-0.635003	0.233789	0.671052	1.44821	0.961688	0.518696	0.452863	0.584729
TRITD7Av1G005850	Pectinesterase inhibitor domain	TraesCS4A02G461500		TRITD7Av1G005850					0.00664155	0.0429337	-0.99795	0.367664	25.5771	22.4213	16.6514	4.28999	14.2653	7.87975
TRITD2Bv1G064720	Protein kinase domain	TraesCS2B02G193000, TraesCS2A02G166900, TraesCS2D02G174500	AT3G14350, AT1G53730	TRITD2Bv1G064720					0.00675232	0.0434973	-0.945961	0.349215	0.257279	0.259477	0.422207	0.133188	0.142519	0.0779831
TRITD7Av1G006120	Pectinesterase inhibitor domain	TraesCS7A02G028800		TRITD7Av1G006120					0.00676672	0.0435766	-1.2467	0.460358	4.97756	5.66765	3.93677	0.550357	2.48801	1.83786
TRITD3Bv1G185290	Bifunctional inhibitor/plant lipid transfer protein/seed storage helical domain	TraesCS3B02G360000, TraesCS3D02G323300, TraesCS3D02G323200, TraesCS3A02G329900		TRITD3Bv1G185290					0.00678583	0.0436561	-0.733843	0.271073	1813.69	1571.64	934.94	474.442	865.287	732.567
TRITD0Uv1G053950	Peptidase S54, rhomboid domain	TraesCS6A02G369500, TraesCS6D02G352900, TraesCS6B02G405700	AT1G18600, AT1G74130, AT1G74140	TRITD0Uv1G053950					0.00682934	0.0438917	-0.760963	0.281312	1.64827	1.99884	2.41742	0.779957	1.49053	0.667336
TRITD3Av1G197570	Homocysteine-binding domain	TraesCS3A02G322600, TraesCS3D02G308900, TraesCS3B02G343000	AT3G22740, AT3G63250	TRITD3Av1G197570					0.00690313	0.0442499	-1.45918	0.540142	1.49207	0.735262	1.08447	0.0828439	0.53939	0.274497
TRITD5Bv1G096580	Zinc finger, Dof-type	TraesCS5B02G154100, TraesCS5D02G161000, TraesCS5A02G155900		TRITD5Bv1G096580	Dof	AT5G60200.1	7e-35	TARGET OF MONOPTEROS 6	0.00691384	0.0442915	-0.769874	0.285036	22.9815	14.7549	18.1983	5.11353	11.6374	10.4315
TRITD3Bv1G013220				TRITD3Bv1G013220					0.00696451	0.0445408	-0.830193	0.307645	1.90731	2.00218	3.55736	0.645115	1.20451	1.42843
TRITD3Bv1G006040	Glycosyltransferase 61	TraesCS3B02G023700, TraesCS3A02G022200, TraesCS3D02G024500		TRITD3Bv1G006040					0.00701858	0.0447886	-0.749717	0.278089	8.85032	4.09704	4.2285	2.12633	2.39876	3.19936
TRITD2Av1G034590	Short-chain dehydrogenase/reductase SDR	TraesCS2D02G124600	AT4G03140	TRITD2Av1G034590					0.00704482	0.0449304	-1.78427	0.662134	0.353169	0.66492	0.644778	0.0617095	0	0.228731
TRITD7Bv1G033750	F-box domain	TraesCS7B02G083700, TraesCS7D02G179800, TraesCS7A02G178000		TRITD7Bv1G033750					0.00707917	0.0450943	-0.629355	0.233692	14.292	18.1806	15.1746	10.2086	5.4509	10.8542
TRITD5Av1G227320	UDP-glucuronosyl/UDP-glucosyltransferase	TraesCS5B02G471100, TraesCS5D02G473600	AT3G16520	TRITD5Av1G227320					0.00707777	0.0450943	-1.21478	0.451062	0.406076	0.949486	0.624047	0.312335	0.0894433	0.196508
TRITD4Av1G144640	Basic-leucine zipper domain	TraesCS4A02G183400, TraesCS4B02G135000, TraesCS4D02G129900	AT1G08320	TRITD4Av1G144640	bZIP	AT1G08320.2	1e-147	bZIP family protein	0.0071289	0.0453556	-0.868816	0.322889	1.03549	1.0928	0.707221	0.222915	0.545016	0.469603
TRITD7Bv1G197870	Potassium transporter	TraesCS7B02G371100, TraesCS7D02G456900, TraesCS7A02G469300		TRITD7Bv1G197870					0.00726605	0.0459757	-1.37739	0.513108	0.427289	0.238422	0.228547	0.0654736	0.0414054	0.110044
TRITD4Av1G002030	Tify domain	TraesCS4A02G007900, TraesCS4D02G295900, TraesCS4B02G297000		TRITD4Av1G002030					0.00728829	0.0460815	-1.86248	0.694081	11.5253	9.95969	8.42957	0.540044	1.09881	5.74521
TRITD6Bv1G028000	F-box domain	TraesCS6A02G076600, TraesCSU02G027300		TRITD6Bv1G028000					0.00730016	0.0461285	-0.676915	0.252314	3.03361	2.30272	1.35592	1.23674	1.10261	0.914307
TRITD1Av1G107460	Uncharacterised protein family, basic secretory protein	TraesCS1A02G166600, TraesCS1D02G174100, TraesCS1B02G183100		TRITD1Av1G107460					0.00733307	0.0462792	-1.02395	0.381882	1.3815	0.853123	1.31548	0.219514	0.439403	0.65351
TRITD7Av1G279720	Protein kinase domain	TraesCS7A02G569900, TraesCS7D02G542700		TRITD7Av1G279720					0.0073615	0.0463966	-0.728898	0.271974	1.94084	1.36098	1.11967	0.634226	0.500346	1.05101
TRITD3Bv1G239180	Transcription factor, MADS-box	TraesCS3B02G469700, TraesCS3A02G434400, TraesCS3D02G427700		TRITD3Bv1G239180	M-type_MADS	AT4G22950.1	2e-32	AGAMOUS-like 19	0.00738693	0.0465217	-0.982107	0.366611	6.86296	6.46421	5.06804	1.70074	4.61658	1.42053
TRITD3Bv1G128450	ABC transporter-like	TraesCS3B02G248500, TraesCS3D02G234300, TraesCS3A02G218000		TRITD3Bv1G128450					0.00740298	0.0465743	-0.610957	0.228126	2.05724	1.2837	1.98852	0.775542	0.879719	1.24149
TRITD2Av1G265250	Importin-beta, N-terminal domain	TraesCS2B02G506500, TraesCS2D02G480800	AT3G08947	TRITD2Av1G265250					0.00744074	0.0467406	-1.02972	0.384733	1.07464	0.589716	0.727456	0.443547	0.13824	0.330134
TRITD1Av1G019270	Bifunctional inhibitor/plant lipid transfer protein/seed storage helical domain superfamily	TraesCS1A02G062500, TraesCS1D02G063800, TraesCS1D02G063500, TraesCS1D02G063700, TraesCS1D02G063900, TraesCS1B02G080800		TRITD1Av1G019270					0.00751223	0.047055	-0.644896	0.241241	1291.77	1183.48	717.371	408.746	693.387	570.201
TRITD6Bv1G039110	Fatty acid hydroxylase	TraesCS6B02G123100, TraesCS6D02G088300, TraesCS6A02G095000	AT1G69640, AT1G14290	TRITD6Bv1G039110					0.00756374	0.0472916	-1.35609	0.507718	1.29484	1.63185	1.01769	0.330203	0.376995	0.219071
TRITD4Av1G178860		TraesCS4A02G239800, TraesCS4D02G073900, TraesCS4B02G075200		TRITD4Av1G178860					0.00759667	0.0474414	-0.705533	0.264295	3.54083	2.32313	2.20564	1.14917	1.14521	1.61136
TRITD1Av1G052410	Bicarbonate transporter, eukaryotic	TraesCS1A02G117500, TraesCS1B02G137300, TraesCS1D02G118600	AT4G32510, AT5G25430, AT1G74810, AT1G15460	TRITD1Av1G052410					0.00764984	0.0476539	-1.13207	0.424449	64.898	63.6546	75.2107	15.3582	13.5574	50.7412
TRITD6Av1G218770	C2 domain	TraesCS6A02G386900, TraesCS6B02G426600, TraesCS6D02G371600	AT1G04150	TRITD6Av1G218770					0.00771091	0.0479394	-1.73541	0.651313	0.0675256	0.116537	0.102767	0.0196258	0	0.0366864
TRITD1Bv1G059270	Protein kinase domain	TraesCS1B02G134800, TraesCS1D02G116300, TraesCS1A02G114900		TRITD1Bv1G059270					0.00785023	0.048581	-0.591631	0.222548	9.65843	9.22576	6.347	3.39804	6.33289	4.51428
TRITD2Bv1G163220	Dynein light chain, type 1/2	TraesCS2B02G344700, TraesCS2A02G337200, TraesCS2D02G325700	AT1G23220	TRITD2Bv1G163220					0.00786821	0.0486273	-0.595727	0.224153	3.22666	3.47349	4.0205	2.17213	1.35629	2.52733
TRITD2Bv1G260460	Leucine-rich repeat domain superfamily	TraesCS2B02G607500, TraesCS2A02G580500		TRITD2Bv1G260460					0.00796523	0.0491323	-0.627862	0.236613	0.262106	0.284016	0.298523	0.153777	0.136707	0.157447
TRITD2Bv1G202960		TraesCS2B02G429800, TraesCS2D02G408600		TRITD2Bv1G202960					0.0079724	0.0491692	-0.694066	0.261592	1.6028	1.82933	1.64084	0.731934	0.775666	1.02993
TRITD6Bv1G065240	Late embryogenesis abundant protein, LEA_2 subgroup	TraesCS6B02G176500, TraesCS6A02G148200, TraesCS6D02G137600		TRITD6Bv1G065240					0.00798816	0.0492402	-0.955769	0.360318	4.82867	6.04676	3.16424	0.934437	2.16772	2.54678
TRITD7Av1G249170	Potassium transporter	TraesCS7A02G469300, TraesCS7B02G371100, TraesCS7D02G456900		TRITD7Av1G249170					0.00803375	0.0494461	-1.57761	0.59518	0.690369	0.253323	1.12802	0.0436491	0.207027	0.146725
TRITD1Bv1G222620		TraesCS1B02G461700, TraesCS1D02G436600, TraesCS1A02G426800		TRITD1Bv1G222620					0.00807081	0.0496401	-1.58228	0.597291	0.937907	0.799889	0.910848	0.124549	0.55821	0.0545307
TRITD4Bv1G025270		TraesCS4B02G075200, TraesCS4D02G073900, TraesCS4A02G239800		TRITD4Bv1G025270					0.00812143	0.0498598	-1.44028	0.544121	2.02333	0.798576	0.902307	0.229833	0.163602	0.358079
TRITD7Av1G017760	Dymeclin	TraesCS7A02G069000	AT1G04200	TRITD7Av1G017760					0.00813009	0.0499056	-0.870401	0.328873	2.5032	1.27708	2.03181	0.783234	0.470874	1.22384
