# Supplementary material for: Transcriptomic and Physiological Response of Durum Wheat Grain to Short-Term Heat Stress during Early Grain Filling
Source: Preprints.org preprint supplement (doi:10.20944/preprints202112.0111.v1), 2021-12-07
Supplement: Supplementary file 9 [file Supplementary Table5.xlsx]

## Sheet: Upregulated genes
source	term_name	term_id	adjusted_p_value	negative_log10_of_adjusted_p_value	term_size	query_size	intersection_size	effective_domain_size
GO:BP	photosynthesis	GO:0015979	3.68422e-16	15.4337	679	1606	46	120744
GO:BP	phosphorelay signal transduction system	GO:0000160	1.04872e-12	11.9793	285	1606	27	120744
GO:BP	phenylpropanoid biosynthetic process	GO:0009699	1.41385e-12	11.8496	55	1606	14	120744
GO:BP	erythrose 4-phosphate/phosphoenolpyruvate family amino acid metabolic process	GO:1902221	2.10837e-10	9.67605	81	1606	14	120744
GO:BP	response to heat	GO:0009408	1.97217e-09	8.70505	115	1606	15	120744
GO:BP	protein-chromophore linkage	GO:0018298	4.25999e-09	8.37059	68	1606	12	120744
GO:BP	small molecule catabolic process	GO:0044282	1.83631e-06	5.73605	251	1606	17	120744
GO:BP	chaperone-mediated protein folding	GO:0061077	2.24169e-06	5.64942	18	1606	6	120744
GO:BP	olefinic compound metabolic process	GO:0120254	2.24169e-06	5.64942	59	1606	9	120744
GO:BP	cell wall biogenesis	GO:0042546	2.53646e-06	5.59577	291	1606	18	120744
GO:BP	secondary metabolic process	GO:0019748	5.92568e-06	5.22726	186	1606	14	120744
GO:BP	benzene-containing compound metabolic process	GO:0042537	1.25444e-05	4.90155	73	1606	9	120744
GO:BP	regulation of systemic acquired resistance	GO:0010112	1.265e-05	4.89791	24	1606	6	120744
GO:BP	response to stimulus	GO:0050896	1.76164e-05	4.75408	4823	1606	105	120744
GO:BP	aromatic amino acid family metabolic process	GO:0009072	2.70192e-05	4.56833	214	1606	14	120744
GO:BP	sexual reproduction	GO:0019953	0.000146597	3.83387	187	1606	12	120744
GO:BP	cellular response to environmental stimulus	GO:0104004	0.000432632	3.36388	67	1606	7	120744
GO:BP	protein folding	GO:0006457	0.000538957	3.26845	326	1606	15	120744
GO:BP	carbohydrate metabolic process	GO:0005975	0.000779911	3.10795	2641	1606	60	120744
GO:BP	photorespiration	GO:0009853	0.000779911	3.10795	32	1606	5	120744
GO:BP	signaling	GO:0023052	0.000922945	3.03482	1184	1606	33	120744
GO:BP	alcohol biosynthetic process	GO:0046165	0.0010459	2.98051	55	1606	6	120744
GO:BP	generation of precursor metabolites and energy	GO:0006091	0.00112326	2.94952	848	1606	26	120744
GO:BP	cell wall organization or biogenesis	GO:0071554	0.00125607	2.90098	905	1606	27	120744
GO:BP	carbon fixation	GO:0015977	0.00277544	2.55667	46	1606	5	120744
GO:BP	biological process involved in interspecies interaction between organisms	GO:0044419	0.00459952	2.33729	378	1606	14	120744
GO:BP	response to reactive oxygen species	GO:0000302	0.00528614	2.27686	54	1606	5	120744
GO:BP	response to biotic stimulus	GO:0009607	0.00745985	2.12727	403	1606	14	120744
GO:BP	external encapsulating structure organization	GO:0045229	0.00765341	2.11615	693	1606	20	120744
GO:BP	steroid metabolic process	GO:0008202	0.00906644	2.04256	92	1606	6	120744
GO:BP	seed germination	GO:0009845	0.00999842	2.00007	64	1606	5	120744
GO:BP	steroid biosynthetic process	GO:0006694	0.0161522	1.79177	74	1606	5	120744
GO:BP	oligopeptide transport	GO:0006857	0.0282086	1.54962	88	1606	5	120744
GO:BP	cellular carbohydrate metabolic process	GO:0044262	0.0351334	1.45428	663	1606	17	120744
GO:BP	cell communication	GO:0007154	0.0360887	1.44263	1706	1606	35	120744
GO:BP	cellular metabolic compound salvage	GO:0043094	0.0417747	1.37909	100	1606	5	120744
GO:MF	oxidoreductase activity, acting on single donors with incorporation of molecular oxygen, incorporation of two atoms of oxygen	GO:0016702	5.3108e-11	10.2748	137	1606	18	120744
GO:MF	carbon-nitrogen lyase activity	GO:0016840	5.3108e-11	10.2748	158	1606	19	120744
GO:MF	dioxygenase activity	GO:0051213	1.32597e-10	9.87747	148	1606	18	120744
GO:MF	chlorophyll binding	GO:0016168	1.07013e-08	7.97056	74	1606	12	120744
GO:MF	tetrapyrrole binding	GO:0046906	6.20771e-07	6.20707	2568	1606	70	120744
GO:MF	lyase activity	GO:0016829	2.15748e-06	5.66605	994	1606	36	120744
GO:MF	alkylbase DNA N-glycosylase activity	GO:0003905	2.26995e-06	5.64398	19	1606	6	120744
GO:MF	hydrolase activity, acting on glycosyl bonds	GO:0016798	1.82704e-05	4.73825	1629	1606	47	120744
GO:MF	channel activity	GO:0015267	3.8631e-05	4.41306	482	1606	21	120744
GO:MF	iron ion binding	GO:0005506	0.000113303	3.94576	1826	1606	48	120744
GO:MF	ribulose-bisphosphate carboxylase activity	GO:0016984	0.000191717	3.71734	25	1606	5	120744
GO:MF	DNA-binding transcription factor activity	GO:0003700	0.000212387	3.67287	1986	1606	50	120744
GO:MF	transition metal ion binding	GO:0046914	0.000578818	3.23746	4385	1606	89	120744
GO:MF	oxidoreductase activity, acting on paired donors, with incorporation or reduction of molecular oxygen	GO:0016705	0.000782235	3.10666	1859	1606	45	120744
GO:MF	unfolded protein binding	GO:0051082	0.000782235	3.10666	174	1606	10	120744
GO:MF	fucosyltransferase activity	GO:0008417	0.000895985	3.0477	60	1606	6	120744
GO:MF	peptidyl-prolyl cis-trans isomerase activity	GO:0003755	0.00192222	2.7162	163	1606	9	120744
GO:MF	carboxypeptidase activity	GO:0004180	0.0115578	1.93712	221	1606	9	120744
GO:MF	monooxygenase activity	GO:0004497	0.0166135	1.77954	1108	1606	26	120744
GO:MF	FAD binding	GO:0071949	0.0194545	1.71098	286	1606	10	120744
GO:MF	calcium ion binding	GO:0005509	0.0215052	1.66746	1080	1606	25	120744
GO:MF	ADP binding	GO:0043531	0.0215052	1.66746	2209	1606	44	120744
GO:CC	photosystem I	GO:0009522	2.76028e-15	14.559	123	1606	21	120744		False
GO:CC	thylakoid	GO:0009579	2.71509e-11	10.5662	1002	1606	46	120744		False
GO:CC	chloroplast	GO:0009507	4.46546e-09	8.35013	1798	1606	60	120744		False
GO:CC	plastid	GO:0009536	9.86554e-09	8.00588	1845	1606	60	120744		False
GO:CC	cell wall	GO:0005618	5.87605e-06	5.23091	403	1606	20	120744		False
GO:CC	external encapsulating structure	GO:0030312	9.27128e-06	5.03286	417	1606	20	120744		False
GO:CC	apoplast	GO:0048046	1.61154e-05	4.79276	473	1606	21	120744		False
GO:CC	extracellular region	GO:0005576	0.000111406	3.95309	1809	1606	47	120744		False
GO:CC	cell periphery	GO:0071944	0.00235745	2.62756	1580	1606	38	120744		False
GO:CC	membrane protein complex	GO:0098796	0.0028088	2.55148	1167	1606	30	120744		False
GO:CC	peroxisome	GO:0005777	0.00394527	2.40392	150	1606	8	120744		False
GO:CC	microbody	GO:0042579	0.00394527	2.40392	150	1606	8	120744		False
GO:CC	organelle subcompartment	GO:0031984	0.0041194	2.38517	1101	1606	28	120744		False
GO:CC	plasma membrane	GO:0005886	0.0264143	1.57816	1008	1606	23	120744		False
GO:CC	cytoplasm	GO:0005737	0.0484214	1.31496	6433	1606	105	120744		False

## Sheet: Downregulated genes
source	term_name	term_id	adjusted_p_value	negative_log10_of_adjusted_p_value	term_size	query_size	intersection_size	effective_domain_size
GO:BP	carbohydrate metabolic process	GO:0005975	2.72645e-13	12.5644	2641	2075	107	120744
GO:BP	transcription, DNA-templated	GO:0006351	7.47944e-11	10.1261	4603	2075	148	120744
GO:BP	phosphorelay signal transduction system	GO:0000160	9.22871e-11	10.0349	285	2075	27	120744
GO:BP	regulation of metabolic process	GO:0019222	4.07088e-09	8.39031	4966	2075	148	120744
GO:BP	positive regulation of transcription, DNA-templated	GO:0045893	1.23012e-08	7.91005	343	2075	26	120744
GO:BP	regulation of transcription by RNA polymerase II	GO:0006357	9.0591e-08	7.04291	410	2075	27	120744
GO:BP	defense response	GO:0006952	3.2923e-07	6.4825	619	2075	33	120744
GO:BP	spermidine biosynthetic process	GO:0008295	4.56141e-07	6.3409	20	2075	7	120744
GO:BP	response to stimulus	GO:0050896	5.85434e-06	5.23252	4823	2075	130	120744
GO:BP	proteolysis	GO:0006508	8.40559e-06	5.07543	2555	2075	79	120744
GO:BP	signaling	GO:0023052	1.26513e-05	4.89787	1184	2075	45	120744
GO:BP	homologous chromosome segregation	GO:0045143	2.97749e-05	4.52615	24	2075	6	120744
GO:BP	oxylipin biosynthetic process	GO:0031408	0.000113029	3.94681	31	2075	6	120744
GO:BP	positive regulation of biological process	GO:0048518	0.000169999	3.76955	705	2075	29	120744
GO:BP	cellular transition metal ion homeostasis	GO:0046916	0.000368878	3.43312	56	2075	7	120744
GO:BP	circadian rhythm	GO:0007623	0.000732875	3.13497	63	2075	7	120744
GO:BP	rhythmic process	GO:0048511	0.000732875	3.13497	63	2075	7	120744
GO:BP	amine metabolic process	GO:0009308	0.00258233	2.58799	251	2075	13	120744
GO:BP	macromolecule catabolic process	GO:0009057	0.00308018	2.51142	1110	2075	35	120744
GO:BP	fucose metabolic process	GO:0006004	0.00362136	2.44113	85	2075	7	120744
GO:BP	growth	GO:0040007	0.00411199	2.38595	265	2075	13	120744
GO:BP	carbohydrate transport	GO:0008643	0.00431634	2.36488	88	2075	7	120744
GO:BP	aspartate family amino acid biosynthetic process	GO:0009067	0.00431634	2.36488	88	2075	7	120744
GO:BP	negative regulation of catalytic activity	GO:0043086	0.00460374	2.33689	44	2075	5	120744
GO:BP	regulation of molecular function	GO:0065009	0.00911079	2.04044	193	2075	10	120744
GO:BP	cell communication	GO:0007154	0.00990666	2.00407	1706	2075	46	120744
GO:BP	organic hydroxy compound metabolic process	GO:1901615	0.0100997	1.99569	231	2075	11	120744
GO:BP	catabolic process	GO:0009056	0.017821	1.74907	2599	2075	63	120744
GO:BP	developmental growth	GO:0048589	0.0180743	1.74294	184	2075	9	120744
GO:BP	leaf development	GO:0048366	0.0193408	1.71353	92	2075	6	120744
GO:BP	isoprenoid metabolic process	GO:0006720	0.0212697	1.67224	224	2075	10	120744
GO:BP	small molecule metabolic process	GO:0044281	0.0270329	1.56811	3069	2075	71	120744
GO:BP	potassium ion transmembrane transport	GO:0071805	0.0280189	1.55255	102	2075	6	120744
GO:BP	dephosphorylation	GO:0016311	0.0305663	1.51476	436	2075	15	120744
GO:BP	chromosome segregation	GO:0007059	0.0321924	1.49225	138	2075	7	120744
GO:BP	aminoglycan metabolic process	GO:0006022	0.0329148	1.48261	77	2075	5	120744
GO:BP	transmembrane transport	GO:0055085	0.0349452	1.45661	3068	2075	70	120744
GO:BP	protein dephosphorylation	GO:0006470	0.0355336	1.44936	326	2075	12	120744
GO:BP	response to oxygen-containing compound	GO:1901700	0.0399697	1.39827	759	2075	22	120744
GO:BP	DNA conformation change	GO:0071103	0.049431	1.306	305	2075	11	120744
GO:MF	enzyme inhibitor activity	GO:0004857	2.38459e-43	42.6226	870	2075	95	120744
GO:MF	nutrient reservoir activity	GO:0045735	3.41373e-23	22.4668	361	2075	45	120744
GO:MF	aspartic-type endopeptidase activity	GO:0004190	1.72276e-17	16.7638	482	2075	44	120744
GO:MF	hydrolase activity, hydrolyzing O-glycosyl compounds	GO:0004553	6.63223e-08	7.17834	1466	2075	59	120744
GO:MF	hydrolase activity, acting on glycosyl bonds	GO:0016798	1.01486e-06	5.99359	1629	2075	60	120744
GO:MF	transporter activity	GO:0005215	1.01963e-06	5.99156	3563	2075	106	120744
GO:MF	sucrose synthase activity	GO:0016157	1.41547e-06	5.8491	34	2075	8	120744
GO:MF	RNA polymerase II transcription regulatory region sequence-specific DNA binding	GO:0000977	1.75989e-06	5.75451	158	2075	15	120744
GO:MF	racemase and epimerase activity	GO:0016854	2.39258e-06	5.62113	100	2075	12	120744
GO:MF	extracellular ligand-gated ion channel activity	GO:0005230	4.5963e-05	4.33759	55	2075	8	120744
GO:MF	neurotransmitter receptor activity	GO:0030594	4.5963e-05	4.33759	55	2075	8	120744
GO:MF	regulatory region nucleic acid binding	GO:0001067	6.81427e-05	4.16658	220	2075	15	120744
GO:MF	DNA-binding transcription factor activity	GO:0003700	0.000214521	3.66853	1986	2075	60	120744
GO:MF	hydrolase activity, acting on carbon-nitrogen (but not peptide) bonds, in linear amidines	GO:0016813	0.000293603	3.53224	23	2075	5	120744
GO:MF	oxidoreductase activity, acting on the CH-NH2 group of donors	GO:0016638	0.000613097	3.21247	43	2075	6	120744
GO:MF	passive transmembrane transporter activity	GO:0022803	0.000719512	3.14296	482	2075	21	120744
GO:MF	chromatin binding	GO:0003682	0.00095124	3.02171	115	2075	9	120744
GO:MF	protein serine/threonine phosphatase activity	GO:0004722	0.00323674	2.48989	262	2075	13	120744
GO:MF	hydrolase activity, acting on carbon-nitrogen (but not peptide) bonds	GO:0016810	0.00327062	2.48537	263	2075	13	120744
GO:MF	monooxygenase activity	GO:0004497	0.00434677	2.36183	1108	2075	34	120744
GO:MF	oxidoreductase activity, acting on single donors with incorporation of molecular oxygen	GO:0016701	0.00434677	2.36183	177	2075	10	120744
GO:MF	dioxygenase activity	GO:0051213	0.00450306	2.34649	148	2075	9	120744
GO:MF	chitin binding	GO:0008061	0.00605753	2.2177	73	2075	6	120744
GO:MF	transferase activity, transferring glycosyl groups	GO:0016757	0.00644347	2.19088	2198	2075	57	120744
GO:MF	iron ion binding	GO:0005506	0.00655791	2.18323	1826	2075	49	120744
GO:MF	sequence-specific DNA binding	GO:0043565	0.00671683	2.17284	973	2075	30	120744
GO:MF	hydrolase activity, acting on ester bonds	GO:0016788	0.0090184	2.04487	2385	2075	60	120744
GO:MF	molecular transducer activity	GO:0060089	0.0114966	1.93943	144	2075	8	120744
GO:MF	lipase activity	GO:0016298	0.0173486	1.76073	155	2075	8	120744
GO:MF	oxidoreductase activity, acting on single donors with incorporation of molecular oxygen, incorporation of two atoms of oxygen	GO:0016702	0.0282139	1.54954	137	2075	7	120744
GO:MF	transaminase activity	GO:0008483	0.0387437	1.4118	114	2075	6	120744
GO:MF	transferase activity, transferring nitrogenous groups	GO:0016769	0.0387437	1.4118	114	2075	6	120744
GO:MF	2 iron, 2 sulfur cluster binding	GO:0051537	0.0409927	1.38729	116	2075	6	120744
GO:MF	protein heterodimerization activity	GO:0046982	0.0476461	1.32197	694	2075	20	120744
GO:CC	nucleus	GO:0005634	6.59839e-12	11.1806	5999	2075	184	120744
GO:CC	monolayer-surrounded lipid storage body	GO:0012511	0.00011741	3.9303	15	2075	5	120744
GO:CC	extracellular region	GO:0005576	0.00127848	2.89331	1809	2075	54	120744
GO:CC	condensed chromosome	GO:0000793	0.00461662	2.33568	56	2075	6	120744
GO:CC	CCR4-NOT complex	GO:0030014	0.00575665	2.23983	60	2075	6	120744
GO:CC	lipid droplet	GO:0005811	0.0166919	1.77749	52	2075	5	120744
GO:CC	transferase complex, transferring phosphorus-containing groups	GO:0061695	0.0493841	1.30641	211	2075	9	120744
GO:CC	chromosome	GO:0005694	0.0493841	1.30641	925	2075	26	120744
