# Supplementary material for: Transcriptomic and Physiological Response of Durum Wheat Grain to Short-Term Heat Stress during Early Grain Filling
Source: Preprints.org preprint supplement (doi:10.20944/preprints202112.0111.v1), 2021-12-07
Supplement: Supplementary file 11 [file Supplementary Table6.xlsx]

## Sheet: up network
tdurum	taestivum	interpro_description	TF family	Targets	IVI
TRITD1Av1G031300	TraesCS1A02G084300	Transcription termination factor, mitochondrial/chloroplastic	mTERF	111	72.0708
TRITD1Av1G031300	TraesCS4B02G156500	Transcription termination factor, mitochondrial/chloroplastic	mTERF	98	54.7264
TRITD1Av1G031300	TraesCS4D02G156100	Transcription termination factor, mitochondrial/chloroplastic	mTERF	81	54.7108
TRITD5Av1G214880	TraesCS5B02G425900	Transcription termination factor, mitochondrial/chloroplastic	mTERF	73	100
TRITD5Av1G214880	TraesCS5A02G423600	Transcription termination factor, mitochondrial/chloroplastic	mTERF	66	49.6268
TRITD5Av1G214880	TraesCS5D02G432100	Transcription termination factor, mitochondrial/chloroplastic	mTERF	63	48.175
TRITD4Av1G193170	TraesCS4A02G268500	B-box-type zinc finger	C2C2_CO-like	59	19.7646
TRITD7Bv1G047110	TraesCS7B02G113400	B-box-type zinc finger	C2C2_CO-like	52	10.1645
TRITD7Bv1G047110	TraesCS7D02G209000	B-box-type zinc finger	C2C2_CO-like	51	28.0469
TRITD7Bv1G047110	TraesCS7A02G206200	B-box-type zinc finger	C2C2_CO-like	47	10.2072
TRITD2Av1G254090	TraesCS2A02G445500	SANT/Myb domain	MYB-related	45	2.68
TRITD6Av1G026800	TraesCSU02G183700	AP2/ERF domain	AP2/EREBP	43	1.18969
TRITD1Av1G187540	TraesCS1D02G313900	Transcription termination factor, mitochondrial/chloroplastic	mTERF	41	1.0777
TRITD2Bv1G217080	TraesCS2D02G444300	SANT/Myb domain	MYB-related	41	2.43202
TRITD4Av1G193170	TraesCS4D02G046200	B-box-type zinc finger	C2C2_CO-like	41	5.51168
TRITD5Av1G159570	TraesCS5A02G264800	Myc-type, basic helix-loop-helix (bHLH) domain	bHLH	41	7.34552
TRITD4Av1G193170	TraesCS4B02G045700	B-box-type zinc finger	C2C2_CO-like	36	11.0896
TRITD4Av1G008900	TraesCS4B02G278100	Heat shock factor (HSF)-type, DNA-binding	HSF	32	1.86746
TRITD1Av1G129180	TraesCS1B02G212000	WRKY domain	WRKY	30	2.02932
TRITD2Av1G094230	TraesCS2A02G225900	Zinc finger, Dof-type	C2C2_Dof	30	1.23077
TRITD6Av1G159910	TraesCS6B02G274500	AP2/ERF domain	AP2/EREBP	30	1.27181
TRITD1Av1G147720	TraesCS1A02G231200	AP2/ERF domain	AP2/EREBP	29	3.71866
TRITD5Av1G159570	TraesCS5D02G272800	Myc-type, basic helix-loop-helix (bHLH) domain	bHLH	29	6.00303
TRITD1Av1G129180	TraesCS1A02G197400	WRKY domain	WRKY	28	1.45068
TRITD1Av1G147720	TraesCS1D02G230900	AP2/ERF domain	AP2/EREBP	28	4.07396
TRITD2Av1G254090	TraesCS2B02G466500	SANT/Myb domain	MYB-related	27	1.54371
TRITD1Av1G147720	TraesCS1B02G243200	AP2/ERF domain	AP2/EREBP	26	4.00962
TRITD4Av1G000320	TraesCS4A02G005600	AP2/ERF domain	AP2/EREBP	26	8.08248
TRITD4Av1G259790	TraesCS4A02G482000	Transcription factor GRAS	GRAS	23	3.30281
TRITD7Av1G213000	TraesCS7D02G390300	Protein of unknown function DUF597	PLATZ	23	2.21169
TRITD3Av1G045370	TraesCS3A02G128400	Zinc finger, CCCH-type	C3H	19	1.11449
TRITD6Av1G159910	TraesCS6A02G250900	AP2/ERF domain	AP2/EREBP	19	1.77641
TRITD7Av1G177140	TraesCS7A02G333200	SANT/Myb domain	MYB-related	19	1.007
TRITD4Av1G000320	TraesCS4B02G299500	AP2/ERF domain	AP2/EREBP	18	2.02523
TRITD6Av1G183090	TraesCS6D02G274100	B-box-type zinc finger	C2C2_CO-like	18	21.9659
TRITD4Av1G000320	TraesCS4D02G298400	AP2/ERF domain	AP2/EREBP	17	8.45948
TRITD1Av1G129180	TraesCS1D02G200900	WRKY domain	WRKY	15	1.31628
TRITD6Av1G183090	TraesCS6A02G293200	B-box-type zinc finger	C2C2_CO-like	15	1.81401
TRITD7Av1G213000	TraesCS7B02G296800	Protein of unknown function DUF597	PLATZ	15	1.87867
TRITD2Bv1G256520	TraesCS2D02G563400	Zinc finger, Dof-type	C2C2_Dof	14	1.03861
TRITD4Av1G008900	TraesCS4D02G276500	Heat shock factor (HSF)-type, DNA-binding	HSF	14	1.59226
TRITD6Av1G183090	TraesCS6B02G323400	B-box-type zinc finger	C2C2_CO-like	14	1.76566
TRITD7Av1G213000	TraesCS7A02G394800	Protein of unknown function DUF597	PLATZ	14	2.27924
TRITD2Av1G094230	TraesCS2B02G249200	Zinc finger, Dof-type	C2C2_Dof	13	1.49463
TRITD7Av1G058510	TraesCS7A02G180900	AP2/ERF domain	AP2/EREBP	12	1.11164
TRITD7Av1G058510	TraesCS7B02G085900	AP2/ERF domain	AP2/EREBP	12	1.0462
TRITD7Av1G058510	TraesCS7D02G182700	AP2/ERF domain	AP2/EREBP	12	1.16463
TRITD2Bv1G256520	TraesCS2A02G590800	Zinc finger, Dof-type	C2C2_Dof	10	1.01657
TRITD2Av1G267740	TraesCS2B02G517400	WRKY domain	WRKY	10	1.04561
TRITD4Av1G008900	TraesCS4A02G027700	Heat shock factor (HSF)-type, DNA-binding	HSF	10	1.39561
TRITD2Av1G267740	TraesCS2A02G489500	WRKY domain	WRKY	9	1.02131
TRITD2Av1G094230	TraesCS2D02G231600	Zinc finger, Dof-type	C2C2_Dof	9	1.09289
TRITD2Av1G268360	TraesCS2A02G491000	PB1 domain	ARF	8	1.08519
TRITD2Av1G268360	TraesCS2B02G519200	PB1 domain	ARF	8	1.02511
TRITD2Av1G267740	TraesCS2D02G489700	WRKY domain	WRKY	8	1.04375
TRITD2Av1G268360	TraesCS2D02G491200	PB1 domain	ARF	8	1.02756
TRITD5Av1G134350	TraesCS5D02G190800	WRKY domain	WRKY	7	1.33518
TRITD1Av1G187540	TraesCS1A02G313400	Transcription termination factor, mitochondrial/chloroplastic	mTERF	5	1.01507
TRITD5Av1G134350	TraesCS5A02G185700	WRKY domain	WRKY	5	1.00832
TRITD4Av1G259790	TraesCS7D02G011400	Transcription factor GRAS	GRAS	5	1.05928
TRITD5Av1G134350	TraesCS5B02G183800	WRKY domain	WRKY	4	1.014
TRITD7Av1G003200	TraesCS7A02G014200	Transcription factor GRAS	GRAS	4	1.01907
TRITD2Av1G287650	TraesCS2B02G592900	Zinc finger, Dof-type	C2C2_Dof	3	1.0257

## Sheet: down network
tdurum	taestivum	interpro_description	TF family	Targets	IVI
TRITD5Av1G116250	TraesCS5B02G154100	Zinc finger, Dof-type	C2C2_Dof	470	100
TRITD7Av1G179730	TraesCS7D02G344400	Transcription factor CBF/NF-Y/archaeal histone domain	CCAAT_HAP5	442	87.512
TRITD5Av1G116250	TraesCS5A02G155900	Zinc finger, Dof-type	C2C2_Dof	420	56.5142
TRITD2Av1G204960	TraesCS2A02G326600	NAC domain	NAC	403	30.8736
TRITD4Av1G000100	TraesCS4A02G006100	SANT/Myb domain	MYB-related	393	47.7352
TRITD7Av1G179730	TraesCS7B02G248300	Transcription factor CBF/NF-Y/archaeal histone domain	CCAAT_HAP5	386	47.3907
TRITD5Av1G116250	TraesCS5D02G161000	Zinc finger, Dof-type	C2C2_Dof	357	39.99
TRITD7Av1G179730	TraesCS7A02G336700	Transcription factor CBF/NF-Y/archaeal histone domain	CCAAT_HAP5	349	48.7884
TRITD7Av1G062170	TraesCS7A02G189200	NAC domain	NAC	343	37.7505
TRITD4Av1G000100	TraesCS4D02G297900	SANT/Myb domain	MYB-related	324	47.4243
TRITD3Av1G273310	TraesCS3A02G497600	Protein of unknown function DUF597	PLATZ	287	29.3934
TRITD7Av1G040190	TraesCS7B02G036500	SANT/Myb domain	MYB-related	274	10.9871
TRITD2Av1G204960	TraesCS2D02G336300	NAC domain	NAC	264	17.1714
TRITD7Av1G062170	TraesCS7B02G094000	NAC domain	NAC	263	27.4829
TRITD1Av1G171690	TraesCS1B02G285000	SANT/Myb domain	MYB-related	260	41.0705
TRITD3Av1G273310	TraesCS3D02G505200	Protein of unknown function DUF597	PLATZ	243	21.942
TRITD7Av1G061680	TraesCS1B02G283000	SANT/Myb domain	MYB-related	241	10.799
TRITD7Av1G065380	TraesCS7A02G194700	NAC domain	NAC	231	22.1537
TRITD5Av1G150900	TraesCS5A02G245900	NAC domain	NAC	230	26.3732
TRITD4Av1G000100	TraesCS4B02G299000	SANT/Myb domain	MYB-related	226	22.4556
TRITD7Av1G279920	TraesCS7B02G489500	NAC domain	NAC	224	28.1184
TRITD1Av1G171690	TraesCS1D02G275400	SANT/Myb domain	MYB-related	223	22.8288
TRITD7Av1G065380	TraesCS7B02G100300	NAC domain	NAC	223	25.4402
TRITD7Av1G047760	TraesCS7B02G056300	NAC domain	NAC	220	22.6904
TRITD1Av1G171690	TraesCS1A02G275800	SANT/Myb domain	MYB-related	218	20.9884
TRITD7Av1G279920	TraesCS7A02G569100	NAC domain	NAC	217	24.4358
TRITD4Bv1G199040	TraesCS5A02G529300	Lateral organ boundaries, LOB	AS2/LOB	214	4.52355
TRITD7Av1G279920	TraesCS7D02G543500	NAC domain	NAC	212	25.6928
TRITD5Bv1G140360	TraesCS5B02G243300	NAC domain	NAC	211	30.1922
TRITD7Av1G065380	TraesCS7D02G196300	NAC domain	NAC	205	24.5471
TRITD7Av1G047760	TraesCS7D02G154200	NAC domain	NAC	196	19.3059
TRITD7Av1G047760	TraesCS7A02G152500	NAC domain	NAC	193	22.359
TRITD3Av1G273310	TraesCS3B02G560400	Protein of unknown function DUF597	PLATZ	188	11.315
TRITD3Av1G022150	TraesCS3B02G092800	NAC domain	NAC	184	16.831
TRITD3Av1G022150	TraesCS3A02G077900	NAC domain	NAC	178	26.8336
TRITD4Bv1G199040	TraesCS4B02G361100	Lateral organ boundaries, LOB	AS2/LOB	151	3.85122
TRITD2Av1G098880	TraesCS2D02G234000	SANT/Myb domain	MYB-related	146	7.90227
TRITD3Av1G022150	TraesCS3D02G078500	NAC domain	NAC	145	15.6745
TRITD7Bv1G170420	TraesCS7D02G404000	Signal transduction response regulator, receiver domain	GARP_G2-like	123	4.75683
TRITD2Av1G098880	TraesCS2A02G230400	SANT/Myb domain	MYB-related	119	4.77256
TRITD4Bv1G199040	TraesCS4D02G354100	Lateral organ boundaries, LOB	AS2/LOB	112	2.18668
TRITD7Av1G038860	TraesCS7D02G130100	SANT/Myb domain	MYB-related	89	4.62137
TRITD6Av1G152410	TraesCS6D02G219300	SANT/Myb domain	MYB-related	78	2.38524
TRITD7Av1G038860	TraesCS7A02G130700	SANT/Myb domain	MYB-related	74	4.15457
TRITD7Av1G222260	TraesCS7A02G411100	Signal transduction response regulator, receiver domain	GARP_G2-like	70	1.59174
TRITD6Av1G152410	TraesCS6B02G265200	SANT/Myb domain	MYB-related	68	1.64348
TRITD7Av1G038860	TraesCS7B02G031000	SANT/Myb domain	MYB-related	60	1.94558
TRITD5Av1G046770	TraesCS5D02G099100	SANT/Myb domain	MYB-related	51	2.11421
TRITD5Av1G046770	TraesCS5A02G087100	SANT/Myb domain	MYB-related	49	1.54111
TRITD2Av1G255570	TraesCS2B02G469000	Protein of unknown function DUF597	PLATZ	46	1.56849
TRITD5Av1G046770	TraesCS5B02G093000	SANT/Myb domain	MYB-related	44	1.70827
TRITD4Bv1G204780	TraesCS4D02G359600	Homeobox domain	HD	42	1.26041
TRITD4Bv1G204780	TraesCS5A02G549700	Homeobox domain	HD	42	1.4781
TRITD4Av1G002020	TraesCS4B02G296900	Tify domain	tify	39	1.60018
TRITD4Av1G002030	TraesCS4B02G297000	Tify domain	tify	39	1.91974
TRITD4Av1G002030	TraesCS4A02G007900	Tify domain	tify	38	2.04183
TRITD4Bv1G204780	TraesCS4B02G385200	Homeobox domain	HD	38	1.29412
TRITD4Av1G002030	TraesCS4D02G295900	Tify domain	tify	38	1.8908
TRITD6Av1G201020	TraesCS6B02G366700	WRC domain	GRF	37	1.01328
TRITD2Av1G251570	TraesCS2A02G435100	WRC domain	GRF	36	1.17116
TRITD1Av1G030230	TraesCS1D02G084400	SANT/Myb domain	MYB-related	35	1.22297
TRITD5Av1G199120	TraesCS5B02G378000	Homeobox domain	HD	35	1.29199
TRITD6Av1G152410	TraesCS6A02G236700	SANT/Myb domain	MYB-related	35	1.23314
TRITD5Av1G114330	TraesCS5D02G158300	SANT/Myb domain	GARP_G2-like	34	1.86531
TRITD3Bv1G145360	TraesCS3D02G249100	B3 DNA binding domain	ABI3/VP1	33	1.62322
TRITD4Av1G002020	TraesCS4D02G295800	Tify domain	tify	33	1.89441
TRITD1Av1G030230	TraesCS1B02G100600	SANT/Myb domain	MYB-related	31	1.19607
TRITD3Bv1G145360	TraesCS3A02G249100	B3 DNA binding domain	ABI3/VP1	31	1.42735
TRITD1Av1G030230	TraesCS1A02G083100	SANT/Myb domain	MYB-related	29	1.34647
TRITD5Av1G199120	TraesCS5D02G385300	Homeobox domain	HD	29	2.01859
TRITD2Av1G251570	TraesCS2B02G458400	WRC domain	GRF	28	1.02102
TRITD3Bv1G145360	TraesCS3B02G278000	B3 DNA binding domain	ABI3/VP1	28	1.30102
TRITD6Av1G201020	TraesCS6D02G315700	WRC domain	GRF	28	1.01059
TRITD4Av1G142240	TraesCS4D02G131500	SANT/Myb domain	GARP_G2-like	27	1.66677
TRITD5Av1G199120	TraesCS5A02G375800	Homeobox domain	HD	27	1.29994
TRITD3Av1G217650	TraesCS3A02G379900	AP2/ERF domain	AP2/EREBP	26	1.00665
TRITD7Av1G035990	TraesCS7A02G122000	Transcription factor, MADS-box	MADS_II	26	1.01731
TRITD6Av1G146340	TraesCS6A02G227900	Signal transduction response regulator, receiver domain	Pseudo ARR-B	25	1.00443
TRITD4Av1G002020	TraesCS4A02G008000	Tify domain	tify	24	2.2376
TRITD4Av1G142240	TraesCS4A02G180900	SANT/Myb domain	GARP_G2-like	24	1.21788
TRITD5Av1G204680	TraesCS5B02G396600	Transcription factor, MADS-box	MADS_II	24	1.11722
TRITD7Av1G036010	TraesCS7B02G020800	Transcription factor, MADS-box	MADS_II	24	1.01003
TRITD6Av1G146340	TraesCS6B02G253900	Signal transduction response regulator, receiver domain	Pseudo ARR-B	23	1.0081
TRITD7Av1G103100	TraesCS7A02G260500	SBP domain	SBP	23	1.00823
TRITD4Bv1G194510	TraesCS4D02G341700	Transcription factor, MADS-box	MADS_II	22	1.02451
TRITD4Bv1G194510	TraesCS5A02G515500	Transcription factor, MADS-box	MADS_II	22	1.0566
TRITD7Av1G035990	TraesCS7D02G120500	Transcription factor, MADS-box	MADS_II	22	1.03507
TRITD5Av1G190940	TraesCS5A02G349500	PB1 domain	RWP-RK	21	1.00554
TRITD1Av1G211520	TraesCS1D02G404400	B3 DNA binding domain	ARF	20	1.1031
TRITD2Av1G255570	TraesCS2D02G447400	Protein of unknown function DUF597	PLATZ	19	1.07159
TRITD6Av1G201020	TraesCS6A02G335900	WRC domain	GRF	19	1.00602
TRITD6Av1G170910	TraesCS6B02G296900	WRC domain	GRF	19	1.03034
TRITD1Av1G211520	TraesCS1A02G396400	B3 DNA binding domain	ARF	18	1.16832
TRITD1Av1G211520	TraesCS1B02G424700	B3 DNA binding domain	ARF	18	1.00966
TRITD3Bv1G239180	TraesCS3A02G434400	Transcription factor, MADS-box	MADS_I	18	1.0358
TRITD2Av1G247080	TraesCS2D02G418800	Transcription factor, MADS-box	MADS_II	17	1.00562
TRITD2Av1G251570	TraesCS2D02G435200	WRC domain	GRF	17	1.00757
TRITD3Bv1G239180	TraesCS3D02G427700	Transcription factor, MADS-box	MADS_I	16	1.02667
TRITD5Av1G021830	TraesCS5A02G049100	NAC domain	NAC	16	1.00532
TRITD6Av1G146340	TraesCS6D02G207100	Signal transduction response regulator, receiver domain	Pseudo ARR-B	16	1.00403
TRITD4Bv1G194510	TraesCS4B02G346700	Transcription factor, MADS-box	MADS_II	15	1.09566
TRITD5Av1G114330	TraesCS5A02G153000	SANT/Myb domain	GARP_G2-like	15	1.29698
TRITD7Av1G044200	TraesCS7A02G145800	AP2/ERF domain	AP2/EREBP	15	1.0058
TRITD3Av1G033220	TraesCS3B02G126200	NAC domain	NAC	14	1.0362
TRITD5Av1G021830	TraesCS5D02G059700	NAC domain	NAC	14	1.00486
TRITD5Av1G204680	TraesCS5D02G401500	Transcription factor, MADS-box	MADS_II	14	1.01562
TRITD7Av1G192980	TraesCS7B02G270300	NAC domain	NAC	14	1.00846
TRITD3Av1G217650	TraesCS3B02G412500	AP2/ERF domain	AP2/EREBP	13	1.02268
TRITD7Av1G222260	TraesCS7D02G404100	Signal transduction response regulator, receiver domain	GARP_G2-like	13	1.09601
TRITD2Av1G255570	TraesCS2A02G448300	Protein of unknown function DUF597	PLATZ	12	1.05039
TRITD5Av1G204680	TraesCS5A02G391700	Transcription factor, MADS-box	MADS_II	12	1.01468
TRITD1Av1G218490	TraesCS1B02G392200	AP2/ERF domain	AP2/EREBP	11	1.00153
TRITD2Av1G066050	TraesCS2B02G218800	Helix-turn-helix motif	HD	11	1.00141
TRITD2Av1G066050	TraesCS2D02G199200	Helix-turn-helix motif	HD	11	1.00142
TRITD3Av1G033220	TraesCS3D02G109400	NAC domain	NAC	11	1.00419
TRITD1Av1G218490	TraesCS1D02G378800	AP2/ERF domain	AP2/EREBP	10	1.00144
TRITD2Av1G026660	TraesCS2B02G118400	NAC domain	NAC	10	1.00083
TRITD6Av1G055780	TraesCS6D02G140900	B-box-type zinc finger	C2C2_CO-like	10	1.00065
TRITD7Av1G103100	TraesCS7B02G158500	SBP domain	SBP	10	1.00311
TRITD1Av1G218490	TraesCS1A02G372200	AP2/ERF domain	AP2/EREBP	9	1.0015
TRITD5Av1G190940	TraesCS5D02G355900	PB1 domain	RWP-RK	9	1.00263
TRITD7Av1G103100	TraesCS7D02G261500	SBP domain	SBP	9	1.00301
TRITD2Av1G026660	TraesCS2A02G101100	NAC domain	NAC	8	1.00069
TRITD3Av1G033220	TraesCS3A02G107400	NAC domain	NAC	8	1.00382
TRITD5Av1G114330	TraesCS5B02G151800	SANT/Myb domain	GARP_G2-like	8	1.07271
TRITD7Av1G044200	TraesCS7B02G048100	AP2/ERF domain	AP2/EREBP	8	1.00226
TRITD7Av1G044200	TraesCS7D02G147200	AP2/ERF domain	AP2/EREBP	8	1.00178
N/A	TraesCS1D02G272600	AP2/ERF domain	AP2/EREBP	7	1.00156
TRITD5Av1G190940	TraesCS5B02G350900	PB1 domain	RWP-RK	7	1.00073
TRITD2Av1G247080	TraesCS2A02G422400	Transcription factor, MADS-box	MADS_II	6	1.00344
TRITD5Av1G021830	TraesCS5B02G054200	NAC domain	NAC	6	1.00228
TRITD2Av1G066050	TraesCS2A02G188500	Helix-turn-helix motif	HD	5	1.00155
TRITD3Bv1G239180	TraesCS3B02G469700	Transcription factor, MADS-box	MADS_I	4	1.00368
TRITD6Av1G055780	TraesCS6A02G150900	B-box-type zinc finger	C2C2_CO-like	4	1.00065
TRITD2Av1G205170	TraesCS2B02G355600	NAC domain	NAC	3	1
TRITD6Av1G170910	TraesCS6D02G245300	WRC domain	GRF	3	1.00162
