# Supplementary material for: Transcriptomic and Physiological Response of Durum Wheat Grain to Short-Term Heat Stress during Early Grain Filling
Source: Preprints.org preprint supplement (doi:10.20944/preprints202112.0111.v1), 2021-12-07
Supplement: Supplementary file 13 [file Supplementary Table7.xlsx]

## Sheet: DOF targets
tdurum	taestivum	description	interpro_description
TRITD1Av1G002120	TraesCS1A02G007300		Gliadin/LMW glutenin
TRITD1Av1G011320	TraesCS1A02G045500
TRITD1Av1G018200	TraesCS1A02G059300		Neprosin
TRITD1Av1G019270	TraesCS1A02G062500		Bifunctional inhibitor/plant lipid transfer protein/seed storage helical domain superfamily
TRITD1Av1G021620	TraesCS1A02G066100		11-S seed storage protein, plant
TRITD1Av1G111270	TraesCS1A02G172600		Tetratricopeptide-like helical domain superfamily
TRITD1Av1G141230	TraesCS1A02G219700
TRITD1Av1G161380	TraesCS1A02G253100		Methyl-CpG DNA binding
TRITD1Av1G165140	TraesCS1A02G260800
TRITD1Av1G168330	TraesCS1A02G268300
TRITD1Av1G171690	TraesCS1A02G275800		SANT/Myb domain
TRITD1Av1G200970	TraesCS1A02G348200		Matrin/U1-C-like, C2H2-type zinc finger
TRITD1Av1G205620	TraesCS1A02G365300		Glycoside hydrolase, family 28
TRITD1Av1G210730	TraesCS1A02G398200		Thionin
TRITD1Av1G207070	TraesCS1A02G409900	Glucose-6-phosphate 1-epimerase [Source:UniProtKB/TrEMBL;Acc:A0A1D6DA33]	Aldose 1-/Glucose-6-phosphate 1-epimerase
TRITD1Av1G224720	TraesCS1A02G426600
TRITD1Av1G225900	TraesCS1A02G430600		Neprosin
TRITD1Av1G230760	TraesCS1A02G444400		CCT domain
TRITD1Av1G002120	TraesCS1B02G010400	Gamma-gliadin 3 [Source:UniProtKB/TrEMBL;Acc:M9TE79]	Gliadin/LMW glutenin
TRITD1Av1G002200	TraesCS1B02G010600	Delta gliadin-B1 [Source:UniProtKB/TrEMBL;Acc:A0A1D6RER0]	Gliadin/LMW glutenin
TRITD1Av1G011320	TraesCS1B02G058800
TRITD1Bv1G015760	TraesCS1B02G061300		HPT domain superfamily
TRITD1Av1G019530	TraesCS1B02G080900		Bifunctional inhibitor/plant lipid transfer protein/seed storage helical domain superfamily
TRITD1Av1G019530	TraesCS1B02G081000
TRITD1Av1G019530	TraesCS1B02G081200		Bifunctional inhibitor/plant lipid transfer protein/seed storage helical domain superfamily
TRITD1Av1G019530	TraesCS1B02G081300	Endosperm transfer cell specific PR60 [Source:UniProtKB/TrEMBL;Acc:B2C4K0]	Bifunctional inhibitor/plant lipid transfer protein/seed storage helical domain superfamily
TRITD1Av1G021620	TraesCS1B02G084300		11-S seed storage protein, plant
TRITD1Av1G044620	TraesCS1B02G124600		Pyrophosphate-energised proton pump
TRITD1Av1G050310	TraesCS1B02G134800		Protein kinase domain
TRITD1Av1G141230	TraesCS1B02G233000
TRITD1Av1G161380	TraesCS1B02G265000		Methyl-CpG DNA binding
TRITD1Av1G168330	TraesCS1B02G278900
TRITD1Av1G171690	TraesCS1B02G285000		SANT/Myb domain
TRITD1Av1G184880	TraesCS1B02G318300		Tapetum determinant 1
TRITD1Av1G185240	TraesCS1B02G319600		Leucine-rich repeat-containing N-terminal, plant-type
TRITD1Bv1G177800	TraesCS1B02G330000	Globulin 1 [Source:UniProtKB/TrEMBL;Acc:Q0Q5D9]	Cereal seed allergen/grain softness/trypsin and alpha-amylase inhibitor
TRITD1Av1G193070	TraesCS1B02G343500	Transcriptional activator [Source:UniProtKB/TrEMBL;Acc:O04168]	Basic-leucine zipper domain
TRITD1Bv1G191400	TraesCS1B02G362700		Matrin/U1-C-like, C2H2-type zinc finger
TRITD1Av1G200970	TraesCS1B02G362800		Matrin/U1-C-like, C2H2-type zinc finger
TRITD1Av1G224720	TraesCS1B02G460900
TRITD1Av1G230760	TraesCS1B02G479000		CCT domain
TRITD1Av1G002120	TraesCS1D02G001000	Gamma-gliadin 12 [Source:UniProtKB/TrEMBL;Acc:Q94G92]	Gliadin/LMW glutenin
TRITD1Av1G002120	TraesCS1D02G001100	Gamma-gliadin 11 [Source:UniProtKB/TrEMBL;Acc:A1EHE7]	Gliadin/LMW glutenin
TRITD1Av1G011320	TraesCS1D02G046200
TRITD1Av1G018200	TraesCS1D02G060700		Neprosin
TRITD1Av1G019270	TraesCS1D02G063500		Bifunctional inhibitor/plant lipid transfer protein/seed storage helical domain superfamily
TRITD1Av1G019270	TraesCS1D02G063700		Bifunctional inhibitor/plant lipid transfer protein/seed storage helical domain superfamily
TRITD1Av1G019270	TraesCS1D02G063900		Bifunctional inhibitor/plant lipid transfer protein/seed storage helical domain superfamily
TRITD1Av1G021620	TraesCS1D02G067100		11-S seed storage protein, plant
TRITD1Av1G044620	TraesCS1D02G107600		Pyrophosphate-energised proton pump
TRITD1Av1G050310	TraesCS1D02G116300		Protein kinase domain
TRITD1Av1G141230	TraesCS1D02G221200
TRITD1Av1G161380	TraesCS1D02G252700		Methyl-CpG DNA binding
TRITD1Av1G168330	TraesCS1D02G268200
TRITD1Av1G171690	TraesCS1D02G275400		SANT/Myb domain
TRITD1Av1G185240	TraesCS1D02G308500		Leucine-rich repeat-containing N-terminal, plant-type
TRITD1Bv1G177800	TraesCS1D02G317300	Globulin 1 [Source:UniProtKB/TrEMBL;Acc:Q0Q5D4]	Cereal seed allergen/grain softness/trypsin and alpha-amylase inhibitor
TRITD1Av1G193070	TraesCS1D02G332200	Storage protein activator [Source:UniProtKB/TrEMBL;Acc:C1KV22]	Basic-leucine zipper domain
TRITD1Av1G215340	TraesCS1D02G393900		Purine permease, plant
TRITD1Av1G210730	TraesCS1D02G405700	Alpha-2-purothionin [Source:UniProtKB/Swiss-Prot;Acc:P32032]	Thionin
TRITD1Av1G224720	TraesCS1D02G436000
TRITD2Bv1G027830	TraesCS2A02G008400
TRITD2Av1G006180	TraesCS2A02G024100		Knottin, scorpion toxin-like
TRITD2Av1G017730	TraesCS2A02G076000		Neprosin
TRITD2Av1G028210	TraesCS2A02G105500		PA domain
TRITD2Av1G033170	TraesCS2A02G118100
TRITD2Av1G036290	TraesCS2A02G128600		Neprosin
TRITD2Av1G053920	TraesCS2A02G168200	Sucrose synthase [Source:UniProtKB/TrEMBL;Acc:A0A341Q089]	Sucrose synthase
TRITD2Av1G098880	TraesCS2A02G230400		SANT/Myb domain
TRITD2Av1G147130	TraesCS2A02G260600		Protein kinase domain
TRITD2Av1G183200	TraesCS2A02G300500		Phytocyanin domain
TRITD2Av1G189770	TraesCS2A02G310300		Glycoside hydrolase, family 13, N-terminal
TRITD2Av1G204960	TraesCS2A02G326600		NAC domain
TRITD2Av1G198250	TraesCS2A02G344100
TRITD2Av1G227850	TraesCS2A02G385600	Caleosin [Source:UniProtKB/TrEMBL;Acc:W5AY74]	Caleosin-related
TRITD2Av1G280380	TraesCS2A02G530900		Glycosyltransferase 2-like
TRITD2Av1G280980	TraesCS2A02G534000		Bifunctional inhibitor/plant lipid transfer protein/seed storage helical domain
TRITD2Bv1G003650	TraesCS2B02G005200		CCR4-NOT transcription complex subunit 9
TRITD2Av1G002170	TraesCS2B02G012700
TRITD2Bv1G012450	TraesCS2B02G052000		Myb/SANT-like domain
TRITD2Bv1G027830	TraesCS2B02G101400
TRITD2Av1G028210	TraesCS2B02G122400		PA domain
TRITD2Bv1G038670	TraesCS2B02G127400		Aspartic peptidase A1 family
TRITD2Bv1G039760	TraesCS2B02G131100		Aspartic peptidase A1 family
TRITD2Av1G033170	TraesCS2B02G138100
TRITD2Av1G036290	TraesCS2B02G150700		Neprosin
TRITD2Av1G147130	TraesCS2B02G281400		Protein kinase domain
TRITD2Av1G189770	TraesCS2B02G327300		Glycoside hydrolase, family 13, N-terminal
TRITD2Av1G198250	TraesCS2B02G341600
TRITD2Av1G227850	TraesCS2B02G402500	Caleosin [Source:UniProtKB/TrEMBL;Acc:W5B7W5]	Caleosin-related
TRITD0Uv1G015960	TraesCS2B02G501800	Cysteine proteinase inhibitor [Source:UniProtKB/TrEMBL;Acc:A0A1D5U0I5]	Cystatin domain
TRITD2Av1G280380	TraesCS2B02G560100		Glycosyltransferase 2-like
TRITD2Av1G280980	TraesCS2B02G564300		Bifunctional inhibitor/plant lipid transfer protein/seed storage helical domain
TRITD2Bv1G249150	TraesCS2B02G570800		Oxoglutarate/iron-dependent dioxygenase
TRITD0Uv1G089180	TraesCS2B02G570900	GA3ox-B3 protein [Source:UniProtKB/TrEMBL;Acc:A0A140KPV0]	Oxoglutarate/iron-dependent dioxygenase
TRITD2Av1G291390	TraesCS2B02G609300	Cysteine proteinase inhibitor [Source:UniProtKB/TrEMBL;Acc:A0A1D5TV77]	Cystatin domain
TRITD2Av1G002170	TraesCS2D02G010000
TRITD2Av1G003340	TraesCS2D02G014700		Cytochrome P450
TRITD2Av1G028210	TraesCS2D02G105100		PA domain
TRITD2Av1G033170	TraesCS2D02G116900
TRITD2Bv1G059720	TraesCS2D02G138700		Neprosin
TRITD2Av1G098880	TraesCS2D02G234000		SANT/Myb domain
TRITD2Av1G147130	TraesCS2D02G263100		Protein kinase domain
TRITD2Av1G189770	TraesCS2D02G308600		Glycoside hydrolase, family 13, N-terminal
TRITD2Av1G198250	TraesCS2D02G322400
TRITD2Av1G204960	TraesCS2D02G336300		NAC domain
TRITD2Av1G227850	TraesCS2D02G382300	Caleosin [Source:UniProtKB/TrEMBL;Acc:A0A1B5GE57]	Caleosin-related
TRITD0Uv1G015940	TraesCS2D02G477600	Cysteine proteinase inhibitor [Source:UniProtKB/TrEMBL;Acc:A0A1D5ULM7]	Cystatin domain
TRITD2Av1G265250	TraesCS2D02G480800		Importin-beta, N-terminal domain
TRITD2Av1G280380	TraesCS2D02G532800		Glycosyltransferase 2-like
TRITD2Av1G292190	TraesCS2D02G586300	Cysteine proteinase inhibitor [Source:UniProtKB/TrEMBL;Acc:A0A1D6RPM4]	Cystatin domain
TRITD2Av1G291400	TraesCS2D02G589700	Cysteine proteinase inhibitor [Source:UniProtKB/TrEMBL;Acc:A0A1D5URY4]	Cystatin domain
TRITD3Av1G003520	TraesCS3A02G005700		Pectinesterase inhibitor domain
TRITD3Av1G003400	TraesCS3A02G006000		Pectinesterase inhibitor domain
TRITD1Bv1G026230	TraesCS3A02G009500		Pectinesterase inhibitor domain
TRITD1Bv1G026230	TraesCS3A02G010200		Pectinesterase inhibitor domain
TRITD3Av1G022150	TraesCS3A02G077900		NAC domain
TRITD3Av1G026730	TraesCS3A02G092600
TRITD3Av1G028060	TraesCS3A02G095600		Cereal seed allergen/trypsin and alpha-amylase inhibitor, conserved site
TRITD3Av1G055290	TraesCS3A02G140800		GDSL lipase/esterase
TRITD3Av1G066130	TraesCS3A02G156400		DNA-binding pseudobarrel domain superfamily
TRITD3Av1G161750	TraesCS3A02G240900		SANT/Myb domain
TRITD3Av1G161850	TraesCS3A02G241100		Aspartic peptidase A1 family
TRITD3Av1G191790	TraesCS3A02G305700		Xanthine/uracil/vitamin C permease
TRITD3Av1G220640	TraesCS3A02G372000		Basic-leucine zipper domain
TRITD3Av1G220620	TraesCS3A02G372100		Basic-leucine zipper domain
TRITD3Av1G233210	TraesCS3A02G399800	GA 20-oxidase3, GA metabolis [Source: Projected from Oryza sativa (Os07g0169700)]	Oxoglutarate/iron-dependent dioxygenase
TRITD3Av1G243790	TraesCS3A02G425900		Zinc finger, RING-type
TRITD3Av1G250300	TraesCS3A02G442500		Knottin, scorpion toxin-like
TRITD3Av1G265550	TraesCS3A02G483700		Glycoside hydrolase family 17
TRITD3Av1G273310	TraesCS3A02G497600		Protein of unknown function DUF597
TRITD0Uv1G116690	TraesCS3A02G510800
TRITD1Bv1G026230	TraesCS3B02G012300		Pectinesterase inhibitor domain
TRITD3Bv1G077740	TraesCS3B02G071000
TRITD3Av1G022150	TraesCS3B02G092800		NAC domain
TRITD3Av1G028060	TraesCS3B02G111200	Dimeric alpha-amylase inhibitor [Source:UniProtKB/TrEMBL;Acc:Q4U1A4]	Cereal seed allergen/trypsin and alpha-amylase inhibitor, conserved site
TRITD3Av1G066130	TraesCS3B02G183100		DNA-binding pseudobarrel domain superfamily
TRITD3Av1G161750	TraesCS3B02G269100		SANT/Myb domain
TRITD3Av1G161850	TraesCS3B02G269300		Aspartic peptidase A1 family
TRITD3Av1G187320	TraesCS3B02G323300		Ulp1 protease family, C-terminal catalytic domain
TRITD3Av1G191790	TraesCS3B02G330800		Xanthine/uracil/vitamin C permease
TRITD3Av1G220740	TraesCS3B02G404200		Basic-leucine zipper domain
TRITD3Av1G220740	TraesCS3B02G404300		Basic-leucine zipper domain
TRITD3Av1G220740	TraesCS3B02G404400		Basic-leucine zipper domain
TRITD3Av1G233210	TraesCS3B02G432800	GA 20-oxidase3, GA metabolis [Source: Projected from Oryza sativa (Os07g0169700)]	Oxoglutarate/iron-dependent dioxygenase
TRITD3Av1G251110	TraesCS3B02G480100		Knottin, scorpion toxin-like superfamily
TRITD3Av1G265550	TraesCS3B02G530500		Glycoside hydrolase family 17
TRITD3Bv1G263440	TraesCS3B02G544400	Non-specific serine/threonine protein kinase [Source:UniProtKB/TrEMBL;Acc:A0A341SSL9]	Protein kinase domain
TRITD3Bv1G267850	TraesCS3B02G560100
TRITD3Av1G273310	TraesCS3B02G560400		Protein of unknown function DUF597
TRITD3Av1G276950	TraesCS3B02G575100		UDP-glucuronosyl/UDP-glucosyltransferase
TRITD3Bv1G077740	TraesCS3D02G059000
TRITD3Av1G028060	TraesCS3D02G095700		Cereal seed allergen/trypsin and alpha-amylase inhibitor, conserved site
TRITD3Av1G028060	TraesCS3D02G096000		Cereal seed allergen/trypsin and alpha-amylase inhibitor, conserved site
TRITD3Bv1G059880	TraesCS3D02G144000
TRITD3Av1G161750	TraesCS3D02G241200		SANT/Myb domain
TRITD3Av1G161850	TraesCS3D02G241400		Aspartic peptidase A1 family
TRITD3Av1G191790	TraesCS3D02G296200		Xanthine/uracil/vitamin C permease
TRITD3Av1G220610	TraesCS3D02G365000		Basic-leucine zipper domain
TRITD3Av1G233210	TraesCS3D02G393900		Oxoglutarate/iron-dependent dioxygenase
TRITD3Av1G243570	TraesCS3D02G420500		Zinc finger, RING-type
TRITD3Av1G251110	TraesCS3D02G438300		Knottin, scorpion toxin-like superfamily
TRITD3Av1G265550	TraesCS3D02G478800		Glycoside hydrolase family 17
TRITD3Bv1G263440	TraesCS3D02G491800		Protein kinase domain
TRITD3Av1G273310	TraesCS3D02G505200		Protein of unknown function DUF597
TRITD3Av1G276950	TraesCS3D02G514700		UDP-glucuronosyl/UDP-glucosyltransferase
TRITD4Av1G000100	TraesCS4A02G006100		SANT/Myb domain
TRITD4Av1G009810	TraesCS4A02G030000
TRITD4Av1G020880	TraesCS4A02G056500		SecY/SEC61-alpha family
TRITD4Av1G021180	TraesCS4A02G057700	Purple acid phosphatase [Source:UniProtKB/TrEMBL;Acc:A0A341TJS2]	Calcineurin-like phosphoesterase domain, ApaH type
TRITD4Av1G029160	TraesCS4A02G075100
TRITD4Av1G042380	TraesCS4A02G094000		Hexapeptide repeat
TRITD4Av1G051470	TraesCS4A02G108800	Non-specific serine/threonine protein kinase [Source:UniProtKB/TrEMBL;Acc:A0A1D5XBS7]	Protein kinase domain
TRITD4Av1G054470	TraesCS4A02G112300		Gamma interferon inducible lysosomal thiol reductase GILT
TRITD4Av1G075040	TraesCS4A02G139000		Homeobox-like domain superfamily
TRITD4Av1G163940	TraesCS4A02G219400		Heavy metal-associated domain, HMA
TRITD4Av1G183260	TraesCS4A02G248000		Cereal seed allergen/trypsin and alpha-amylase inhibitor, conserved site
TRITD4Av1G198930	TraesCS4A02G284700	WAT1-related protein [Source:UniProtKB/TrEMBL;Acc:A0A1D5X8L9]	EamA domain
TRITD1Bv1G015760	TraesCS4A02G302300		HPT domain superfamily
TRITD4Bv1G002110	TraesCS4A02G304200		HPT domain superfamily
TRITD4Av1G211180	TraesCS4A02G325400		Flavin monooxygenase FMO
TRITD0Uv1G051540	TraesCS4A02G344200		GAF domain
TRITD4Av1G237900	TraesCS4A02G379700		S-phase kinase-associated protein 1-like
TRITD4Av1G243640	TraesCS4A02G418200	Starch synthase, chloroplastic/amyloplastic [Source:UniProtKB/TrEMBL;Acc:Q9FUU6]	Glycosyl transferase, family 1
TRITD4Av1G244920	TraesCS4A02G422300		Cysteine peptidase, cysteine active site
TRITD0Uv1G033050	TraesCS4A02G453400		Gliadin/LMW glutenin
TRITD0Uv1G033010	TraesCS4A02G453600		Gliadin/LMW glutenin
TRITD0Uv1G032980	TraesCS4A02G453800	Type-b avenin-like protein [Source:UniProtKB/TrEMBL;Acc:A0A173DQZ1]	Gliadin/LMW glutenin
TRITD4Av1G256440	TraesCS4A02G460100		Cytochrome P450
TRITD4Av1G256360	TraesCS4A02G460800		Pectinesterase inhibitor domain
TRITD4Av1G256280	TraesCS4A02G461400		Pectinesterase inhibitor domain
TRITD4Bv1G002110	TraesCS4B02G006500		HPT domain superfamily
TRITD4Av1G202810	TraesCS4B02G010800		HPT domain superfamily
TRITD4Av1G202810	TraesCS4B02G011000		HPT domain superfamily
TRITD4Av1G202760	TraesCS4B02G011500		HPT domain superfamily
TRITD4Av1G075040	TraesCS4B02G155200		Homeobox-like domain superfamily
TRITD4Av1G054470	TraesCS4B02G191700		Gamma interferon inducible lysosomal thiol reductase GILT
TRITD4Av1G029160	TraesCS4B02G231000
TRITD4Av1G020880	TraesCS4B02G248500		SecY/SEC61-alpha family
TRITD4Av1G020340	TraesCS4B02G249400		Cereal seed allergen/grain softness/trypsin and alpha-amylase inhibitor
TRITD4Av1G009810	TraesCS4B02G276100
TRITD4Av1G000100	TraesCS4B02G299000		SANT/Myb domain
TRITD4Bv1G186120	TraesCS4B02G328000	Alpha-amylase/trypsin inhibitor CM16 [Source:UniProtKB/Swiss-Prot;Acc:P16159]	Cereal seed allergen/trypsin and alpha-amylase inhibitor, conserved site
TRITD4Bv1G186130	TraesCS4B02G328100	Alpha amylase inhibitor protein [Source:UniProtKB/TrEMBL;Acc:Q53YX8]	Cereal seed allergen/trypsin and alpha-amylase inhibitor, conserved site
TRITD4Bv1G188300	TraesCS4B02G333500		Neprosin
TRITD4Bv1G199040	TraesCS4B02G361100		Lateral organ boundaries, LOB
TRITD4Bv1G203890	TraesCS4B02G381900		PPM-type phosphatase domain
TRITD4Bv1G002110	TraesCS4D02G008600		HPT domain superfamily
TRITD4Av1G202810	TraesCS4D02G009300		HPT domain superfamily
TRITD1Bv1G015760	TraesCS4D02G009600		HPT domain superfamily
TRITD4Av1G163940	TraesCS4D02G094100		Heavy metal-associated domain, HMA
TRITD4Av1G075040	TraesCS4D02G167100		SANT/Myb domain
TRITD4Av1G054470	TraesCS4D02G192900		Gamma interferon inducible lysosomal thiol reductase GILT
TRITD4Av1G042380	TraesCS4D02G211100		Hexapeptide repeat
TRITD4Av1G020880	TraesCS4D02G247900		SecY/SEC61-alpha family
TRITD4Av1G020340	TraesCS4D02G250000		Cereal seed allergen/grain softness/trypsin and alpha-amylase inhibitor
TRITD4Av1G009810	TraesCS4D02G274600
TRITD4Av1G000100	TraesCS4D02G297900		SANT/Myb domain
TRITD4Bv1G186120	TraesCS4D02G325000		Cereal seed allergen/trypsin and alpha-amylase inhibitor, conserved site
TRITD4Bv1G186130	TraesCS4D02G325100		Cereal seed allergen/trypsin and alpha-amylase inhibitor, conserved site
TRITD4Bv1G199040	TraesCS4D02G354100		Lateral organ boundaries, LOB
TRITD4Bv1G203890	TraesCS4D02G357800		PPM-type phosphatase domain
TRITD5Av1G000200	TraesCS5A02G003300	GSP-1 Grain Softness Protein [Source:UniProtKB/TrEMBL;Acc:Q5BHT9]	Bifunctional inhibitor/plant lipid transfer protein/seed storage helical domain
TRITD5Av1G019880	TraesCS5A02G046300
TRITD5Av1G038640	TraesCS5A02G074500		Neprosin
TRITD5Av1G116250	TraesCS5A02G155900		Zinc finger, Dof-type
TRITD5Av1G132510	TraesCS5A02G182200		Xanthine/uracil/vitamin C permease
TRITD5Av1G137200	TraesCS5A02G195200
TRITD5Av1G150900	TraesCS5A02G245900		NAC domain
TRITD5Av1G166410	TraesCS5A02G282800		Oxoglutarate/iron-dependent dioxygenase
TRITD5Av1G166470	TraesCS5A02G283100		Oxoglutarate/iron-dependent dioxygenase
TRITD5Bv1G171730	TraesCS5A02G320200
TRITD5Av1G214770	TraesCS5A02G423100		Armadillo-like helical
TRITD4Bv1G199040	TraesCS5A02G529300		Lateral organ boundaries, LOB
TRITD5Av1G000200	TraesCS5B02G003500	15kDa grain softness protein [Source:UniProtKB/TrEMBL;Acc:Q43659]	Bifunctional inhibitor/plant lipid transfer protein/seed storage helical domain
TRITD5Bv1G020260	TraesCS5B02G050300		Knottin, scorpion toxin-like superfamily
TRITD5Av1G019880	TraesCS5B02G050800
TRITD5Av1G132510	TraesCS5B02G180200		Xanthine/uracil/vitamin C permease
TRITD5Av1G141180	TraesCS5B02G216000		FAD/NAD(P)-binding domain superfamily
TRITD5Bv1G140360	TraesCS5B02G243300		NAC domain
TRITD5Av1G156210	TraesCS5B02G255200		Peptidase S8/S53 domain
TRITD5Av1G166410	TraesCS5B02G282100		Oxoglutarate/iron-dependent dioxygenase
TRITD5Av1G193930	TraesCS5B02G361600		BTB/POZ domain
TRITD5Av1G214770	TraesCS5B02G425000		Armadillo-like helical
TRITD5Av1G220390	TraesCS5B02G447800	DNA (cytosine-5)-methyltransferase [Source:UniProtKB/TrEMBL;Acc:A0A1D5Z514]	Bromo adjacent homology (BAH) domain
TRITD0Uv1G051540	TraesCS5B02G527300		GAF domain
TRITD4Av1G211180	TraesCS5B02G538300	YUC10.1 [Source:UniProtKB/TrEMBL;Acc:W5F8V8]	Flavin monooxygenase FMO
TRITD5Bv1G250310	TraesCS5B02G556700		Glycoside hydrolase, family 32
TRITD5Av1G000200	TraesCS5D02G004000	GSP-1 Grain Softness Protein [Source:UniProtKB/TrEMBL;Acc:Q84QI5]	Cereal seed allergen/grain softness/trypsin and alpha-amylase inhibitor
TRITD5Bv1G020260	TraesCS5D02G056100
TRITD5Bv1G020260	TraesCS5D02G056200		Knottin, scorpion toxin-like superfamily
TRITD5Av1G116250	TraesCS5D02G161000		Zinc finger, Dof-type
TRITD5Av1G132510	TraesCS5D02G186600		Xanthine/uracil/vitamin C permease
TRITD5Av1G137200	TraesCS5D02G198400
TRITD5Av1G166410	TraesCS5D02G289800		Oxoglutarate/iron-dependent dioxygenase
TRITD5Av1G166380	TraesCS5D02G290400		Oxoglutarate/iron-dependent dioxygenase
TRITD5Bv1G157750	TraesCS5D02G290600		Oxoglutarate/iron-dependent dioxygenase
TRITD5Bv1G171730	TraesCS5D02G326100
TRITD5Av1G193930	TraesCS5D02G368400		BTB/POZ domain
TRITD5Av1G214770	TraesCS5D02G431400		Armadillo-like helical
TRITD5Bv1G243850	TraesCS5D02G529000		Aspartic peptidase A1 family
TRITD5Bv1G250310	TraesCS5D02G553000		Glycoside hydrolase, family 32
TRITD4Av1G211180	TraesCS5D02G556600		Flavin monooxygenase FMO
TRITD7Bv1G000430	TraesCS5D02G561800		Pectinesterase inhibitor domain
TRITD6Bv1G008330	TraesCS6A02G029800	Peroxidase [Source:UniProtKB/TrEMBL;Acc:W5GF29]	Plant peroxidase
TRITD6Bv1G013460	TraesCS6A02G044400		Spen paralogue and orthologue SPOC, C-terminal
TRITD6Bv1G014610	TraesCS6A02G049200	Alpha/beta-gliadin [Source:UniProtKB/TrEMBL;Acc:A0A0K2QJX7]	Gliadin/LMW glutenin
TRITD6Bv1G014610	TraesCS6A02G049700	Alpha/beta-gliadin [Source:UniProtKB/TrEMBL;Acc:I0IT64]	Gliadin/LMW glutenin
TRITD6Bv1G014610	TraesCS6A02G049800	Alpha-gliadin (Fragment) [Source:UniProtKB/TrEMBL;Acc:A0A0E3Z6M6]	Gliadin/LMW glutenin
TRITD6Bv1G015100	TraesCS6A02G050900		Neprosin
TRITD6Av1G025160	TraesCS6A02G093200	Endoglucanase [Source:UniProtKB/TrEMBL;Acc:A0A1D6ADY9]	Glycoside hydrolase family 9
TRITD5Bv1G157750	TraesCS6A02G148800		Oxoglutarate/iron-dependent dioxygenase
TRITD6Av1G076230	TraesCS6A02G175100		Mitochondrial carrier protein
TRITD0Uv1G057150	TraesCS6A02G179900		Cytochrome P450
TRITD6Av1G081570	TraesCS6A02G180400		Cytochrome P450
TRITD6Av1G084670	TraesCS6A02G184200		Neprosin
TRITD6Av1G174960	TraesCS6A02G277900		Knottin, scorpion toxin-like superfamily
TRITD6Av1G183930	TraesCS6A02G295600		Zf-FLZ domain
TRITD6Av1G184020	TraesCS6A02G295900		Zf-FLZ domain
TRITD6Av1G196620	TraesCS6A02G324900
TRITD4Av1G202810	TraesCS6A02G364400		HPT domain superfamily
TRITD6Av1G214650	TraesCS6A02G372500		Aspartic peptidase A1 family
TRITD6Av1G226590	TraesCS6A02G420600		Homeobox domain
TRITD6Av1G226570	TraesCS6A02G420800		Homeobox domain
TRITD6Av1G226530	TraesCS6A02G420900		Homeobox domain
TRITD0Uv1G125390	TraesCS6B02G013800
TRITD6Bv1G004060	TraesCS6B02G023700	Endosperm transfer cell specific PR9 [Source:UniProtKB/TrEMBL;Acc:B2C4J7]
TRITD4Av1G211180	TraesCS6B02G033700		Flavin monooxygenase FMO
TRITD6Av1G005860	TraesCS6B02G042500	Peroxidase [Source:UniProtKB/TrEMBL;Acc:A0A341X249]	Plant peroxidase
TRITD6Bv1G008330	TraesCS6B02G042600	Peroxidase [Source:UniProtKB/TrEMBL;Acc:A0A341WSR8]	Plant peroxidase
TRITD6Bv1G013460	TraesCS6B02G061300		Spen paralogue and orthologue SPOC, C-terminal
TRITD0Uv1G055800	TraesCS6B02G064100		Pectinesterase inhibitor domain
TRITD6Bv1G015100	TraesCS6B02G067300		Neprosin
TRITD6Av1G012500	TraesCS6B02G074900		F-box domain
TRITD6Bv1G020780	TraesCS6B02G086500	Alpha/beta-gliadin [Source:UniProtKB/TrEMBL;Acc:A0A0K2QJY6]	Gliadin/LMW glutenin
TRITD6Av1G053370	TraesCS6B02G176500		Late embryogenesis abundant protein, LEA_2 subgroup
TRITD6Av1G081570	TraesCS6B02G205100		Cytochrome P450
TRITD6Av1G076230	TraesCS6B02G210000		Mitochondrial carrier protein
TRITD6Av1G174960	TraesCS6B02G306200		Knottin, scorpion toxin-like superfamily
TRITD6Av1G183930	TraesCS6B02G325700		Zf-FLZ domain
TRITD6Av1G184020	TraesCS6B02G325800		Zf-FLZ domain
TRITD6Av1G196620	TraesCS6B02G355200
TRITD6Bv1G207720	TraesCS6B02G392100		Neprosin
TRITD6Av1G214120	TraesCS6B02G407700		Aspartic peptidase A1 family
TRITD6Av1G214650	TraesCS6B02G410400		Aspartic peptidase A1 family
TRITD6Av1G226530	TraesCS6B02G467400		Homeobox domain
TRITD6Bv1G000060	TraesCS6D02G000200	Monomeric alpha-amylase inhibitor [Source:UniProtKB/TrEMBL;Acc:X2KYP9]	Cereal seed allergen/trypsin and alpha-amylase inhibitor, conserved site
TRITD6Bv1G008330	TraesCS6D02G034200	Peroxidase [Source:UniProtKB/TrEMBL;Acc:A0A1D6BF22]	Plant peroxidase
TRITD6Av1G025160	TraesCS6D02G089200	Endoglucanase [Source:UniProtKB/TrEMBL;Acc:A0A1D6BEU5]	Glycoside hydrolase family 9
TRITD5Av1G166470	TraesCS6D02G138200		Oxoglutarate/iron-dependent dioxygenase
TRITD6Av1G081570	TraesCS6D02G164800		Cytochrome P450
TRITD6Av1G076230	TraesCS6D02G168200		Mitochondrial carrier protein
TRITD6Av1G152410	TraesCS6D02G219300		SANT/Myb domain
TRITD6Av1G183930	TraesCS6D02G276200		Zf-FLZ domain
TRITD6Av1G183980	TraesCS6D02G276300		Zf-FLZ domain
TRITD6Av1G214650	TraesCS6D02G356600		Aspartic peptidase A1 family
TRITD6Av1G226530	TraesCS6D02G404900		Homeobox domain
TRITD7Av1G005870	TraesCS7A02G028100		Pectinesterase inhibitor domain
TRITD7Av1G006070	TraesCS7A02G028600		Pectinesterase inhibitor domain
TRITD7Av1G006120	TraesCS7A02G028800		Pectinesterase inhibitor domain
TRITD7Av1G006160	TraesCS7A02G029300		Pectinesterase inhibitor domain
TRITD7Av1G008200	TraesCS7A02G035500		Gliadin/LMW glutenin
TRITD7Av1G016820	TraesCS7A02G065700		Cysteine peptidase, cysteine active site
TRITD7Av1G025010	TraesCS7A02G086700
TRITD7Av1G035610	TraesCS7A02G120600		AP2/ERF domain
TRITD7Av1G040190	TraesCS7A02G135000		SANT/Myb domain
TRITD7Av1G047760	TraesCS7A02G152500		NAC domain
TRITD7Av1G052210	TraesCS7A02G163000		F-box domain
TRITD7Av1G055960	TraesCS7A02G175800		Cyanobacterial aminoacyl-tRNA synthetase, CAAD domain
TRITD7Av1G059930	TraesCS7A02G185000		NADP-dependent oxidoreductase domain
TRITD7Av1G061680	TraesCS7A02G188800		SANT/Myb domain
TRITD7Av1G062170	TraesCS7A02G189200		NAC domain
TRITD4Bv1G115790	TraesCS7A02G193100		F-box domain
TRITD7Av1G065150	TraesCS7A02G194500		Amino acid transporter, transmembrane domain
TRITD7Av1G065380	TraesCS7A02G194700		NAC domain
TRITD7Av1G074480	TraesCS7A02G213100		Phosphatidylinositol 3-/4-kinase, catalytic domain
TRITD7Av1G081850	TraesCS7A02G226800		Zinc finger C2H2-type
TRITD7Av1G082960	TraesCS7A02G229400		Phosphatidylethanolamine-binding, conserved site
TRITD7Av1G131980	TraesCS7A02G287400	Glucose-1-phosphate adenylyltransferase [Source:UniProtKB/TrEMBL;Acc:A0A341YCA5]	Nucleotidyl transferase domain
TRITD7Av1G179450	TraesCS7A02G336500	RNAse II-like 1 [Source:Projected from Arabidopsis thaliana (AT4G15417) TAIR;Acc:AT4G15417]	Ribonuclease III domain
TRITD7Av1G179730	TraesCS7A02G336700		Transcription factor CBF/NF-Y/archaeal histone domain
TRITD7Av1G188360	TraesCS7A02G350800		Polyketide cyclase/dehydrase
TRITD7Av1G195770	TraesCS7A02G361100		Protein of unknown function DUF761, plant
TRITD7Av1G195860	TraesCS7A02G361200		Protein of unknown function DUF761, plant
TRITD7Bv1G165540	TraesCS7A02G402400		Non-structural maintenance of chromosome element 4, C-terminal
TRITD7Bv1G193780	TraesCS7A02G460300
TRITD7Av1G252020	TraesCS7A02G477500	WAT1-related protein [Source:UniProtKB/TrEMBL;Acc:A0A1D6BR30]	EamA domain
TRITD7Av1G274610	TraesCS7A02G543800
TRITD7Av1G274690	TraesCS7A02G544500
TRITD7Av1G275440	TraesCS7A02G549200		Glycoside hydrolase, family 13, N-terminal
TRITD0Uv1G066970	TraesCS7A02G565700		S-phase kinase-associated protein 1-like
TRITD0Uv1G066970	TraesCS7A02G565800		S-phase kinase-associated protein 1-like
TRITD7Av1G279920	TraesCS7A02G569100		NAC domain
TRITD7Av1G035610	TraesCS7B02G018700		AP2/ERF domain
TRITD7Av1G040190	TraesCS7B02G036500		SANT/Myb domain
TRITD7Av1G047760	TraesCS7B02G056300		NAC domain
TRITD7Av1G052210	TraesCS7B02G068500		F-box domain
TRITD7Av1G053440	TraesCS7B02G072000	Alpha-amylase/trypsin inhibitor CM2 [Source:UniProtKB/Swiss-Prot;Acc:P16851]	Cereal seed allergen/trypsin and alpha-amylase inhibitor, conserved site
TRITD7Av1G055960	TraesCS7B02G081000		Cyanobacterial aminoacyl-tRNA synthetase, CAAD domain
TRITD7Av1G059930	TraesCS7B02G089600		NADP-dependent oxidoreductase domain
TRITD7Av1G059930	TraesCS7B02G090000		NADP-dependent oxidoreductase domain
TRITD7Av1G062170	TraesCS7B02G094000		NAC domain
TRITD7Av1G064440	TraesCS7B02G098400		F-box domain
TRITD7Av1G065380	TraesCS7B02G100300		NAC domain
TRITD7Av1G074480	TraesCS7B02G119800		Phosphatidylinositol 3-/4-kinase, catalytic domain
TRITD7Av1G114110	TraesCS7B02G170600		ER lumen protein retaining receptor
TRITD7Av1G131980	TraesCS7B02G183300	Glucose-1-phosphate adenylyltransferase [Source:UniProtKB/TrEMBL;Acc:C0KWE8]	Nucleotidyl transferase domain
TRITD7Av1G082960	TraesCS7B02G195200		Phosphatidylethanolamine-binding, conserved site
TRITD7Av1G158600	TraesCS7B02G206800		Invertase/pectin methylesterase inhibitor domain superfamily
TRITD7Av1G188360	TraesCS7B02G232100		Polyketide cyclase/dehydrase
TRITD7Av1G179450	TraesCS7B02G248100	RNAse II-like 1 [Source:Projected from Arabidopsis thaliana (AT4G15417) TAIR;Acc:AT4G15417]	Ribonuclease III domain
TRITD7Av1G179730	TraesCS7B02G248300		Transcription factor CBF/NF-Y/archaeal histone domain
TRITD7Av1G196290	TraesCS7B02G265300		Multicopper oxidase, type 1
TRITD7Av1G195860	TraesCS7B02G266700		Protein of unknown function DUF761, plant
TRITD7Av1G226350	TraesCS7B02G319300		Knottin, scorpion toxin-like superfamily
TRITD7Av1G245140	TraesCS7B02G360500
TRITD7Bv1G193680	TraesCS7B02G361100
TRITD7Bv1G193680	TraesCS7B02G361200
TRITD7Bv1G193780	TraesCS7B02G361700		Bifunctional inhibitor/plant lipid transfer protein/seed storage helical domain
TRITD7Av1G261600	TraesCS7B02G409400		Aspartic peptidase A1 family
TRITD7Av1G261660	TraesCS7B02G409500		Aspartic peptidase A1 family
TRITD7Av1G261750	TraesCS7B02G409800		Aspartic peptidase A1 family
TRITD7Bv1G218860	TraesCS7B02G434000	Purple acid phosphatase [Source:UniProtKB/TrEMBL;Acc:A0A1D6C5Q0]	Calcineurin-like phosphoesterase domain, ApaH type
TRITD7Bv1G219210	TraesCS7B02G434900		FBD domain
TRITD7Bv1G221040	TraesCS7B02G440500
TRITD7Av1G275440	TraesCS7B02G472400		Glycoside hydrolase, family 13, N-terminal
TRITD7Av1G279920	TraesCS7B02G489500		NAC domain
TRITD0Uv1G066970	TraesCS7B02G492200		S-phase kinase-associated protein 1-like
TRITD0Uv1G066970	TraesCS7B02G492400		S-phase kinase-associated protein 1-like
TRITD0Uv1G066970	TraesCS7B02G492500		S-phase kinase-associated protein 1-like
TRITD4Av1G256310	TraesCS7D02G025400		Pectinesterase inhibitor domain
TRITD0Uv1G032980	TraesCS7D02G031700	Avenin-like protein [Source:UniProtKB/TrEMBL;Acc:G9I0U3]	Gliadin/LMW glutenin
TRITD0Uv1G033010	TraesCS7D02G031800		Gliadin/LMW glutenin
TRITD0Uv1G033040	TraesCS7D02G032000	Avenin-like a1 [Source:UniProtKB/Swiss-Prot;Acc:Q2A784]	Gliadin/LMW glutenin
TRITD0Uv1G033050	TraesCS7D02G032100		Gliadin/LMW glutenin
TRITD7Av1G016820	TraesCS7D02G060100		Cysteine peptidase, cysteine active site
TRITD4Av1G243640	TraesCS7D02G064300	Starch synthase, chloroplastic/amyloplastic [Source:UniProtKB/TrEMBL;Acc:Q9S7N5]	Glycosyl transferase, family 1
TRITD7Av1G024910	TraesCS7D02G081100
TRITD7Av1G035610	TraesCS7D02G117600		AP2/ERF domain
N/A	TraesCS7D02G135000		SANT/Myb domain
TRITD7Av1G040190	TraesCS7D02G135300		SANT/Myb domain
TRITD7Av1G047760	TraesCS7D02G154200		NAC domain
TRITD7Av1G053440	TraesCS7D02G168000		Cereal seed allergen/trypsin and alpha-amylase inhibitor, conserved site
TRITD7Av1G059930	TraesCS7D02G186400		NADP-dependent oxidoreductase domain
TRITD7Av1G061680	TraesCS7D02G189800		SANT/Myb domain
TRITD4Bv1G115790	TraesCS7D02G194400		F-box domain
TRITD7Av1G065150	TraesCS7D02G196100		Amino acid transporter, transmembrane domain
TRITD7Av1G065380	TraesCS7D02G196300		NAC domain
TRITD7Av1G074480	TraesCS7D02G215000		Phosphatidylinositol 3-/4-kinase, catalytic domain
TRITD7Av1G081850	TraesCS7D02G227600		Zinc finger C2H2-type
TRITD7Av1G082960	TraesCS7D02G230000		Phosphatidylethanolamine-binding, conserved site
TRITD7Av1G114110	TraesCS7D02G271700		ER lumen protein retaining receptor
TRITD7Av1G131980	TraesCS7D02G284900	Glucose-1-phosphate adenylyltransferase [Source:UniProtKB/TrEMBL;Acc:W5I4Y2]	Nucleotidyl transferase domain
TRITD7Av1G188360	TraesCS7D02G328000		Polyketide cyclase/dehydrase
TRITD7Bv1G140380	TraesCS7D02G344100		Ribonuclease III domain
TRITD7Av1G179450	TraesCS7D02G344200		Ribonuclease III domain
TRITD7Av1G179730	TraesCS7D02G344400		Transcription factor CBF/NF-Y/archaeal histone domain
TRITD7Av1G195860	TraesCS7D02G361900		Protein of unknown function DUF761, plant
TRITD7Av1G195770	TraesCS7D02G362000		Protein of unknown function DUF761, plant
TRITD7Bv1G170420	TraesCS7D02G404000		Signal transduction response regulator, receiver domain
TRITD7Av1G226350	TraesCS7D02G411700		Knottin, scorpion toxin-like superfamily
TRITD7Av1G245140	TraesCS7D02G447800
TRITD7Bv1G193680	TraesCS7D02G448200
TRITD7Bv1G193780	TraesCS7D02G449200		Bifunctional inhibitor/plant lipid transfer protein/seed storage helical domain
TRITD7Bv1G218460	TraesCS7D02G504800	PINB-2v1-3 [Source:UniProtKB/TrEMBL;Acc:H6U7Y8]	Bifunctional inhibitor/plant lipid transfer protein/seed storage helical domain
TRITD7Av1G275440	TraesCS7D02G535500		Glycoside hydrolase, family 13, N-terminal
TRITD7Av1G279920	TraesCS7D02G543500		NAC domain
TRITD0Uv1G066960	TraesCS7D02G544900		S-phase kinase-associated protein 1-like
TRITD6Bv1G014610	TraesCSU02G108100	Alpha-gliadin [Source:UniProtKB/TrEMBL;Acc:K7XRA1]	Gliadin/LMW glutenin
TRITD6Bv1G014610	TraesCSU02G108300	Alpha-gliadin [Source:UniProtKB/TrEMBL;Acc:R9XW94]	Gliadin/LMW glutenin
TRITD6Bv1G014610	TraesCSU02G108400	Alpha/beta-gliadin [Source:UniProtKB/TrEMBL;Acc:A0A0K2QJB4]	Gliadin/LMW glutenin
TRITD6Bv1G014610	TraesCSU02G108500	Alpha-gliadin [Source:UniProtKB/TrEMBL;Acc:J7HT09]	Gliadin/LMW glutenin
TRITD0Uv1G023160	TraesCSU02G175100		Oxoglutarate/iron-dependent dioxygenase
TRITD6Bv1G014610	TraesCSU02G188800	Alpha-gliadin [Source:UniProtKB/TrEMBL;Acc:J7HWD3]	Gliadin/LMW glutenin
TRITD6Bv1G014610	TraesCSU02G220200	Alpha-gliadin [Source:UniProtKB/TrEMBL;Acc:H6VLP5]	Gliadin/LMW glutenin
TRITD6Bv1G014610	TraesCSU02G220600	Alpha-gliadin [Source:UniProtKB/TrEMBL;Acc:A0A1K0K0R0]	Gliadin/LMW glutenin
TRITD6Bv1G014610	TraesCSU02G239000	Alpha-gliadin [Source:UniProtKB/TrEMBL;Acc:A0A1K0JNG6]	Gliadin/LMW glutenin
TRITD7Av1G274610	TraesCSU02G246300
